# Supplementary material for: PHF13 is a molecular reader and transcriptional co-regulator of H3K4me2/3
Source: eLife. 2016 May 25;5:e10607. doi: 10.7554/eLife.10607 (PMC4915813; doi:10.7554/eLife.10607)
Supplement: Figure 6—source data 1. — DOI: http://dx.doi.org/10.7554/eLife.10607.020 [file elife-10607-fig6-data1.xlsx]

## Sheet: ChIP-seq.targets.txt
ENSEMBL Gene ID	Gene Name
ENSMUSG00000104238	Gm37587
ENSMUSG00000025903	Lypla1
ENSMUSG00000104217	Gm37988
ENSMUSG00000033813	Tcea1
ENSMUSG00000033793	Atp6v1h
ENSMUSG00000025907	Rb1cc1
ENSMUSG00000051285	Pcmtd1
ENSMUSG00000061024	Rrs1
ENSMUSG00000025911	Adhfe1
ENSMUSG00000097893	1700034P13Rik
ENSMUSG00000104025	E330040D14Rik
ENSMUSG00000056763	Cspp1
ENSMUSG00000057715	A830018L16Rik
ENSMUSG00000054493	Gm9947
ENSMUSG00000025925	Terf1
ENSMUSG00000025921	Rdh10
ENSMUSG00000102457	Gm38342
ENSMUSG00000097744	D030040B21Rik
ENSMUSG00000025940	Tmem70
ENSMUSG00000099714	Gm20587
ENSMUSG00000041809	Efhc1
ENSMUSG00000025933	Tmem14a
ENSMUSG00000102398	Gm37580
ENSMUSG00000073725	Lmbrd1
ENSMUSG00000104516	Gm9884
ENSMUSG00000026058	Khdrbs2
ENSMUSG00000103746	1700001G17Rik
ENSMUSG00000004768	Rab23
ENSMUSG00000026131	Dst
ENSMUSG00000026127	Imp4
ENSMUSG00000026124	Cfc1
ENSMUSG00000045216	Hs6st1
ENSMUSG00000037447	Arid5a
ENSMUSG00000037408	Cnnm4
ENSMUSG00000001138	Cnnm3
ENSMUSG00000087589	D430040D24Rik
ENSMUSG00000102416	4933424G06Rik
ENSMUSG00000026111	Unc50
ENSMUSG00000097268	Gm26805
ENSMUSG00000026077	Npas2
ENSMUSG00000003135	Cnot11
ENSMUSG00000097083	D930019O06Rik
ENSMUSG00000026074	Map4k4
ENSMUSG00000060679	Mrps9
ENSMUSG00000041878	8430432A02Rik
ENSMUSG00000066877	Nck2
ENSMUSG00000041763	Tpp2
ENSMUSG00000041684	Bivm
ENSMUSG00000026048	Ercc5
ENSMUSG00000056870	Gulp1
ENSMUSG00000025995	Wdr75
ENSMUSG00000026104	Stat1
ENSMUSG00000041426	Hibch
ENSMUSG00000026097	Ormdl1
ENSMUSG00000100679	Gm28778
ENSMUSG00000025981	Coq10b
ENSMUSG00000073676	Hspe1
ENSMUSG00000025979	Mob4
ENSMUSG00000046994	Mars2
ENSMUSG00000038349	Plcl1
ENSMUSG00000104310	Gm4081
ENSMUSG00000038323	1700066M21Rik
ENSMUSG00000025971	9430016H08Rik
ENSMUSG00000038305	Spats2l
ENSMUSG00000026039	Sgol2a
ENSMUSG00000063558	Aox1
ENSMUSG00000085054	Gm15834
ENSMUSG00000026032	Ndufb3
ENSMUSG00000026027	Stradb
ENSMUSG00000097573	G730003C15Rik
ENSMUSG00000041075	Fzd7
ENSMUSG00000026020	Nop58
ENSMUSG00000067336	Bmpr2
ENSMUSG00000041040	Fam117b
ENSMUSG00000026017	Carf
ENSMUSG00000073664	Nbeal1
ENSMUSG00000025969	Nrp2
ENSMUSG00000084799	Ino80dos
ENSMUSG00000101599	Gm20342
ENSMUSG00000025967	Eef1b2
ENSMUSG00000098850	Gm27390
ENSMUSG00000070871	Ccnyl1
ENSMUSG00000102140	Gm38058
ENSMUSG00000025949	Pikfyve
ENSMUSG00000015222	Map2
ENSMUSG00000026192	Atic
ENSMUSG00000073652	Apol7d
ENSMUSG00000097131	D230017M19Rik
ENSMUSG00000094050	Gm23472
ENSMUSG00000093956	Gm24497
ENSMUSG00000093843	Gm25939
ENSMUSG00000039354	Smarcal1
ENSMUSG00000046330	Rpl37a
ENSMUSG00000039323	Igfbp2
ENSMUSG00000061815	Rufy4
ENSMUSG00000026179	Pnkd
ENSMUSG00000073650	Catip
ENSMUSG00000026176	Ctdsp1
ENSMUSG00000026174	Rqcd1
ENSMUSG00000026172	Bcs1l
ENSMUSG00000033276	Stk36
ENSMUSG00000033227	Wnt6
ENSMUSG00000089964	Gm16582
ENSMUSG00000090071	Cdk5r2
ENSMUSG00000049339	Fam134a
ENSMUSG00000026199	Ankzf1
ENSMUSG00000026201	Stk16
ENSMUSG00000026203	Dnajb2
ENSMUSG00000101840	Gm28294
ENSMUSG00000026207	Speg
ENSMUSG00000033007	Asic4
ENSMUSG00000051703	Tmem198
ENSMUSG00000032968	Inha
ENSMUSG00000026213	Stk11ip
ENSMUSG00000101849	Gm28386
ENSMUSG00000032883	Acsl3
ENSMUSG00000079470	Utp14b
ENSMUSG00000104497	Gm10555
ENSMUSG00000026248	Mrpl44
ENSMUSG00000026142	Rhbdd1
ENSMUSG00000093782	Gm22396
ENSMUSG00000026159	Agfg1
ENSMUSG00000093254	Mir5126
ENSMUSG00000073633	Fbxo36
ENSMUSG00000036707	Cab39
ENSMUSG00000026226	Spata3
ENSMUSG00000026227	2810459M11Rik
ENSMUSG00000026229	Psmd1
ENSMUSG00000062590	Armc9
ENSMUSG00000079445	B3gnt7
ENSMUSG00000073627	C130036L24Rik
ENSMUSG00000101328	Rpl30-ps6
ENSMUSG00000026238	Ptma
ENSMUSG00000026240	Cops7b
ENSMUSG00000026254	Eif4e2
ENSMUSG00000026255	Efhd1
ENSMUSG00000048000	Gigyf2
ENSMUSG00000026289	Atg16l1
ENSMUSG00000070738	Dgkd
ENSMUSG00000036251	Trpm8
ENSMUSG00000036206	Sh3bp4
ENSMUSG00000055013	Agap1
ENSMUSG00000092627	D130058E05Rik
ENSMUSG00000034432	Cops8
ENSMUSG00000026305	Lrrfip1
ENSMUSG00000034343	Ube2f
ENSMUSG00000026307	Scly
ENSMUSG00000047443	Fam132b
ENSMUSG00000034292	Traf3ip1
ENSMUSG00000026311	Asb1
ENSMUSG00000034220	Gpc1
ENSMUSG00000047067	Dusp28
ENSMUSG00000026269	Rnpepl1
ENSMUSG00000026270	Capn10
ENSMUSG00000047793	Sned1
ENSMUSG00000098997	Mir6901
ENSMUSG00000101172	Gm28535
ENSMUSG00000026275	Ppp1r7
ENSMUSG00000026276	2002-09-01
ENSMUSG00000100927	Gm28536
ENSMUSG00000026278	Bok
ENSMUSG00000026280	Atg4b
ENSMUSG00000026283	Ing5
ENSMUSG00000097814	Panct2
ENSMUSG00000026333	Gin1
ENSMUSG00000026319	2310035C23Rik
ENSMUSG00000038866	Zcchc2
ENSMUSG00000044340	Phlpp1
ENSMUSG00000026377	Nifk
ENSMUSG00000064302	Clasp1
ENSMUSG00000026380	Tfcp2l1
ENSMUSG00000098273	Mir6346
ENSMUSG00000098923	Tmem185b
ENSMUSG00000107329	NA
ENSMUSG00000104253	Gm37174
ENSMUSG00000026342	Slc35f5
ENSMUSG00000036155	Mgat5
ENSMUSG00000026349	Ccnt2
ENSMUSG00000036104	Rab3gap1
ENSMUSG00000056211	R3hdm1
ENSMUSG00000026353	Ubxn4
ENSMUSG00000085526	Gm16083
ENSMUSG00000046404	Yod1
ENSMUSG00000055184	Fam72a
ENSMUSG00000026433	Rab29
ENSMUSG00000026434	Nucks1
ENSMUSG00000100037	Gm29103
ENSMUSG00000026435	Slc45a3
ENSMUSG00000026436	Elk4
ENSMUSG00000099874	Gm29629
ENSMUSG00000079330	Lemd1
ENSMUSG00000009772	Nuak2
ENSMUSG00000042046	Dstyk
ENSMUSG00000026439	Rbbp5
ENSMUSG00000026443	Lrrn2
ENSMUSG00000100228	Gm29257
ENSMUSG00000026447	Pik3c2b
ENSMUSG00000046062	Ppp1r15b
ENSMUSG00000041757	Plekha6
ENSMUSG00000070644	Etnk2
ENSMUSG00000064246	Chil1
ENSMUSG00000026456	Cyb5r1
ENSMUSG00000026457	Adipor1
ENSMUSG00000042229	Rabif
ENSMUSG00000042207	Kdm5b
ENSMUSG00000026426	Arl8a
ENSMUSG00000026421	Csrp1
ENSMUSG00000041801	Phlda3
ENSMUSG00000026411	Tmem9
ENSMUSG00000041642	Kif21b
ENSMUSG00000097433	Gm26781
ENSMUSG00000097448	Platr22
ENSMUSG00000092912	Gm24086
ENSMUSG00000056268	Dennd1b
ENSMUSG00000033952	Aspm
ENSMUSG00000052726	Kcnt2
ENSMUSG00000018196	Glrx2
ENSMUSG00000018189	Uchl5
ENSMUSG00000100455	Gm29170
ENSMUSG00000088323	Gm25663
ENSMUSG00000006005	Tpr
ENSMUSG00000053286	Trmt1l
ENSMUSG00000026483	Fam129a
ENSMUSG00000043019	Edem3
ENSMUSG00000008475	Arpc5
ENSMUSG00000042751	Nmnat2
ENSMUSG00000042708	Shcbp1l
ENSMUSG00000099227	Mir8114
ENSMUSG00000026473	Glul
ENSMUSG00000033701	Acbd6
ENSMUSG00000102833	Gm9694
ENSMUSG00000050565	Tor1aip2
ENSMUSG00000103705	4930518J20Rik
ENSMUSG00000026596	Abl2
ENSMUSG00000101905	4930439D14Rik
ENSMUSG00000049881	2810025M15Rik
ENSMUSG00000058267	Mrps14
ENSMUSG00000103006	4933417C20Rik
ENSMUSG00000040423	Rc3h1
ENSMUSG00000053332	Gas5
ENSMUSG00000064440	Gm26224
ENSMUSG00000080463	Gm22489
ENSMUSG00000064816	Gm22357
ENSMUSG00000084667	Gm23212
ENSMUSG00000026708	Cenpl
ENSMUSG00000026698	Pigc
ENSMUSG00000103393	Gm38304
ENSMUSG00000026696	Vamp4
ENSMUSG00000026584	Scyl3
ENSMUSG00000026578	Ccdc181
ENSMUSG00000026575	Nme7
ENSMUSG00000026568	Mpc2
ENSMUSG00000040713	Creg1
ENSMUSG00000097196	Gm26665
ENSMUSG00000000544	Gpa33
ENSMUSG00000102909	Gm2453
ENSMUSG00000052428	Tmco1
ENSMUSG00000095752	Gm24182
ENSMUSG00000026687	Aldh9a1
ENSMUSG00000097503	3110045C21Rik
ENSMUSG00000044306	4930500M09Rik
ENSMUSG00000053925	Gm9929
ENSMUSG00000056569	Mpz
ENSMUSG00000013973	Dedd
ENSMUSG00000006412	Pfdn2
ENSMUSG00000026641	Usf1
ENSMUSG00000038235	F11r
ENSMUSG00000060244	Alyref2
ENSMUSG00000026554	Dcaf8
ENSMUSG00000050229	Pigm
ENSMUSG00000026547	Tagln2
ENSMUSG00000028354	Fmn2
ENSMUSG00000039748	Exo1
ENSMUSG00000026504	Sdccag8
ENSMUSG00000091476	Gm16432
ENSMUSG00000026502	Desi2
ENSMUSG00000026500	Cox20
ENSMUSG00000026494	Kif26b
ENSMUSG00000038949	Cnst
ENSMUSG00000038936	Sccpdh
ENSMUSG00000073486	Gm10518
ENSMUSG00000026490	Cdc42bpa
ENSMUSG00000038855	Itpkb
ENSMUSG00000026496	Parp1
ENSMUSG00000073485	H3f3aos
ENSMUSG00000038806	Sde2
ENSMUSG00000026520	Pycr2
ENSMUSG00000038793	Lefty1
ENSMUSG00000026519	Tmem63a
ENSMUSG00000062169	Cnih4
ENSMUSG00000026511	Srp9
ENSMUSG00000038576	Susd4
ENSMUSG00000042901	Aida
ENSMUSG00000039318	Rab3gap2
ENSMUSG00000102526	Gm37785
ENSMUSG00000026615	Eprs
ENSMUSG00000097784	A430105J06Rik
ENSMUSG00000039224	D1Pas1
ENSMUSG00000099404	Gm28172
ENSMUSG00000079045	Prox1os
ENSMUSG00000026634	Angel2
ENSMUSG00000097845	A230020J21Rik
ENSMUSG00000062510	Nsl1
ENSMUSG00000073478	D730003I15Rik
ENSMUSG00000026627	Tmem206
ENSMUSG00000037461	Ints7
ENSMUSG00000026622	Nek2
ENSMUSG00000037434	Slc30a1
ENSMUSG00000097089	Gm26879
ENSMUSG00000094131	Gm22265
ENSMUSG00000079144	A130010J15Rik
ENSMUSG00000026639	Lamb3
ENSMUSG00000096929	A330023F24Rik
ENSMUSG00000025902	Sox17
ENSMUSG00000033845	Mrpl15
ENSMUSG00000033774	Npbwr1
ENSMUSG00000090031	4732440D04Rik
ENSMUSG00000097797	Gm26901
ENSMUSG00000025912	Mybl1
ENSMUSG00000045210	Vcpip1
ENSMUSG00000099032	Tcf24
ENSMUSG00000025917	Cops5
ENSMUSG00000025938	Slco5a1
ENSMUSG00000042414	Prdm14
ENSMUSG00000005886	Ncoa2
ENSMUSG00000025937	Lactb2
ENSMUSG00000025930	Msc
ENSMUSG00000043716	Rpl7
ENSMUSG00000025939	Ube2w
ENSMUSG00000079658	Tceb1
ENSMUSG00000101717	Gm28756
ENSMUSG00000041859	Mcm3
ENSMUSG00000102766	Gm6420
ENSMUSG00000026155	Smap1
ENSMUSG00000026153	Fam135a
ENSMUSG00000033569	Adgrb3
ENSMUSG00000026064	Ptp4a1
ENSMUSG00000026134	Prim2
ENSMUSG00000042197	Zfp451
ENSMUSG00000096992	Gm26788
ENSMUSG00000042111	Ccdc115
ENSMUSG00000101803	Gm28419
ENSMUSG00000102434	Gm38049
ENSMUSG00000037470	Uggt1
ENSMUSG00000010453	Kansl3
ENSMUSG00000067653	Ankrd23
ENSMUSG00000079610	Ankrd39
ENSMUSG00000026121	Sema4c
ENSMUSG00000037351	Actr1b
ENSMUSG00000026116	Tmem131
ENSMUSG00000026112	Coa5
ENSMUSG00000060771	Tsga10
ENSMUSG00000048234	Rnf149
ENSMUSG00000050967	Creg2
ENSMUSG00000070939	Tgfbrap1
ENSMUSG00000057363	Uxs1
ENSMUSG00000026047	Kdelc1
ENSMUSG00000025993	Slc40a1
ENSMUSG00000025986	Slc39a10
ENSMUSG00000026107	Nabp1
ENSMUSG00000018417	Myo1b
ENSMUSG00000043629	1700019D03Rik
ENSMUSG00000026098	Pms1
ENSMUSG00000099913	Gm28551
ENSMUSG00000026095	Asnsd1
ENSMUSG00000096141	Dnah7a
ENSMUSG00000073678	Pgap1
ENSMUSG00000025982	Sf3b1
ENSMUSG00000103030	E330011M16Rik
ENSMUSG00000025980	Hspd1
ENSMUSG00000025977	Boll
ENSMUSG00000038331	Satb2
ENSMUSG00000097519	4930558J18Rik
ENSMUSG00000048495	Tyw5
ENSMUSG00000026034	Clk1
ENSMUSG00000026037	Orc2
ENSMUSG00000038174	Fam126b
ENSMUSG00000026028	Trak2
ENSMUSG00000038079	Tmem237
ENSMUSG00000026024	Als2
ENSMUSG00000097819	Gm26813
ENSMUSG00000026021	Sumo1
ENSMUSG00000026019	Wdr12
ENSMUSG00000026014	Raph1
ENSMUSG00000040865	Ino80d
ENSMUSG00000025968	Ndufs1
ENSMUSG00000025959	Klf7
ENSMUSG00000087213	2810408I11Rik
ENSMUSG00000045005	Fzd5
ENSMUSG00000025950	Idh1
ENSMUSG00000026004	Kansl1l
ENSMUSG00000026196	Bard1
ENSMUSG00000026193	Fn1
ENSMUSG00000039395	Mreg
ENSMUSG00000055322	Tns1
ENSMUSG00000006299	Aamp
ENSMUSG00000006301	Tmbim1
ENSMUSG00000033364	Usp37
ENSMUSG00000026135	Zfp142
ENSMUSG00000093155	Gm25035
ENSMUSG00000026171	Rnf25
ENSMUSG00000055197	Fev
ENSMUSG00000033159	Cnppd1
ENSMUSG00000026198	Abcb6
ENSMUSG00000033124	Atg9a
ENSMUSG00000026200	Glb1l
ENSMUSG00000099204	Gm27943
ENSMUSG00000026202	Tuba4a
ENSMUSG00000026204	Ptprn
ENSMUSG00000026209	Dnpep
ENSMUSG00000032997	Chpf
ENSMUSG00000026211	Obsl1
ENSMUSG00000026235	Epha4
ENSMUSG00000026245	Farsb
ENSMUSG00000073643	Wdfy1
ENSMUSG00000004364	Cul3
ENSMUSG00000055980	Irs1
ENSMUSG00000036766	Dner
ENSMUSG00000026219	Trip12
ENSMUSG00000099644	Gm28626
ENSMUSG00000026234	Ncl
ENSMUSG00000026239	Pde6d
ENSMUSG00000026241	Nppc
ENSMUSG00000026247	Ecel1
ENSMUSG00000089821	Efhd1os
ENSMUSG00000101942	Gm19582
ENSMUSG00000044783	Hjurp
ENSMUSG00000034486	Gbx2
ENSMUSG00000026309	Ilkap
ENSMUSG00000067071	Hes6
ENSMUSG00000055866	Per2
ENSMUSG00000097251	5033417F24Rik
ENSMUSG00000014602	Kif1a
ENSMUSG00000026273	Mterf4
ENSMUSG00000100351	Gm7867
ENSMUSG00000026274	Pask
ENSMUSG00000034088	Hdlbp
ENSMUSG00000026277	Stk25
ENSMUSG00000026279	Thap4
ENSMUSG00000026281	Dtymk
ENSMUSG00000040693	Slco4c1
ENSMUSG00000040648	Ppip5k2
ENSMUSG00000026335	Pam
ENSMUSG00000056536	Pign
ENSMUSG00000099843	Gm7160
ENSMUSG00000101583	Gm20753
ENSMUSG00000009905	Kdsr
ENSMUSG00000009907	Vps4b
ENSMUSG00000107722	2900060B14Rik
ENSMUSG00000080542	Gm22710
ENSMUSG00000048402	Gli2
ENSMUSG00000037035	Inhbb
ENSMUSG00000004451	Ralb
ENSMUSG00000098447	Gm27184
ENSMUSG00000026383	Epb41l5
ENSMUSG00000026384	Ptpn4
ENSMUSG00000026389	Steap3
ENSMUSG00000003721	Insig2
ENSMUSG00000102014	2900009J06Rik
ENSMUSG00000036086	Zranb3
ENSMUSG00000103999	Gm38026
ENSMUSG00000026355	Mcm6
ENSMUSG00000026356	Dars
ENSMUSG00000045382	Cxcr4
ENSMUSG00000026399	Cd55
ENSMUSG00000101904	Gm29427
ENSMUSG00000026409	Pfkfb2
ENSMUSG00000016528	Mapkapk2
ENSMUSG00000016526	Dyrk3
ENSMUSG00000026425	Srgap2
ENSMUSG00000026437	Cdk18
ENSMUSG00000097760	6030442K20Rik
ENSMUSG00000054387	Mdm4
ENSMUSG00000102425	Gm26616
ENSMUSG00000070643	Sox13
ENSMUSG00000102976	Zc3h11a
ENSMUSG00000094410	Gm38394
ENSMUSG00000102049	Zbed6
ENSMUSG00000020423	Btg2
ENSMUSG00000042429	Adora1
ENSMUSG00000026458	Ppfia4
ENSMUSG00000073557	Ppp1r12b
ENSMUSG00000097993	Ptprv
ENSMUSG00000003051	Elf3
ENSMUSG00000041926	Rnpep
ENSMUSG00000041889	Shisa4
ENSMUSG00000009418	Nav1
ENSMUSG00000041605	5730559C18Rik
ENSMUSG00000052759	Gpr25
ENSMUSG00000041570	Camsap2
ENSMUSG00000026398	Nr5a2
ENSMUSG00000026393	Nek7
ENSMUSG00000019230	Lhx9
ENSMUSG00000102365	Gm37045
ENSMUSG00000026361	Cdc73
ENSMUSG00000018199	Trove2
ENSMUSG00000006010	BC003331
ENSMUSG00000052748	Swt1
ENSMUSG00000100594	2810414N06Rik
ENSMUSG00000032666	1700025G04Rik
ENSMUSG00000026482	Rgl1
ENSMUSG00000042772	Smg7
ENSMUSG00000026479	Lamc2
ENSMUSG00000026478	Lamc1
ENSMUSG00000042699	Dhx9
ENSMUSG00000045968	Teddm2
ENSMUSG00000033671	Cep350
ENSMUSG00000026466	Tor1aip1
ENSMUSG00000015484	Fam163a
ENSMUSG00000060985	Tdrd5
ENSMUSG00000026600	Soat1
ENSMUSG00000060519	Tor3a
ENSMUSG00000033557	Fam20b
ENSMUSG00000026594	Ralgps2
ENSMUSG00000070565	Rasal2
ENSMUSG00000004031	Brinp2
ENSMUSG00000014226	Cacybp
ENSMUSG00000043467	Zbtb37
ENSMUSG00000026709	Dars2
ENSMUSG00000026705	Klhl20
ENSMUSG00000026701	Prdx6
ENSMUSG00000040297	Suco
ENSMUSG00000086277	4930558K02Rik
ENSMUSG00000026694	Mettl13
ENSMUSG00000026577	Blzf1
ENSMUSG00000026576	Atp1b1
ENSMUSG00000040843	Tiprl
ENSMUSG00000102302	Gm38190
ENSMUSG00000026571	Dcaf6
ENSMUSG00000026566	Mpzl1
ENSMUSG00000026565	Pou2f1
ENSMUSG00000026564	Dusp27
ENSMUSG00000040629	Mael
ENSMUSG00000026558	Uck2
ENSMUSG00000026688	Mgst3
ENSMUSG00000026683	Nuf2
ENSMUSG00000026675	Hsd17b7
ENSMUSG00000026667	Uhmk1
ENSMUSG00000026663	Atf6
ENSMUSG00000058076	Sdhc
ENSMUSG00000005674	Tomm40l
ENSMUSG00000013593	Ndufs2
ENSMUSG00000062963	Ufc1
ENSMUSG00000013997	Nit1
ENSMUSG00000097045	Gm26641
ENSMUSG00000091993	B930036N10Rik
ENSMUSG00000094668	Gm24871
ENSMUSG00000026544	Dusp23
ENSMUSG00000026527	Rgs7
ENSMUSG00000057335	Cep170
ENSMUSG00000019699	Akt3
ENSMUSG00000015961	Adss
ENSMUSG00000086350	B230369F24Rik
ENSMUSG00000100725	Gm28062
ENSMUSG00000039630	Hnrnpu
ENSMUSG00000026492	Tfb2m
ENSMUSG00000026491	Ahctf1
ENSMUSG00000026489	Adck3
ENSMUSG00000026497	Mixl1
ENSMUSG00000060743	H3f3a
ENSMUSG00000026516	Nvl
ENSMUSG00000038733	Wdr26
ENSMUSG00000004880	Lbr
ENSMUSG00000089429	Gm26004
ENSMUSG00000022995	Enah
ENSMUSG00000038633	Degs1
ENSMUSG00000046836	Brox
ENSMUSG00000056050	Mia3
ENSMUSG00000039377	Hlx
ENSMUSG00000073481	2002-03-01
ENSMUSG00000039349	C130074G19Rik
ENSMUSG00000026618	Iars2
ENSMUSG00000097261	4930532G15Rik
ENSMUSG00000039246	Lyplal1
ENSMUSG00000001305	Rrp15
ENSMUSG00000104312	Gm37912
ENSMUSG00000026608	Kctd3
ENSMUSG00000026605	Cenpf
ENSMUSG00000010175	Prox1
ENSMUSG00000089872	Rps6kc1
ENSMUSG00000037568	Vash2
ENSMUSG00000066595	Mfsd7b
ENSMUSG00000026632	Tatdn3
ENSMUSG00000026628	Atf3
ENSMUSG00000026626	Ppp2r5a
ENSMUSG00000037474	Dtl
ENSMUSG00000102840	Gm38037
ENSMUSG00000055833	1700034H15Rik
ENSMUSG00000026637	Traf5
ENSMUSG00000047384	A730013G03Rik
ENSMUSG00000016181	Diexf
ENSMUSG00000009633	G0s2
ENSMUSG00000097325	Gm16897
ENSMUSG00000040624	Plekhg1
ENSMUSG00000040675	Mthfd1l
ENSMUSG00000038587	Akap12
ENSMUSG00000061759	Armt1
ENSMUSG00000019767	Ccdc170
ENSMUSG00000019796	Lrp11
ENSMUSG00000040034	Nup43
ENSMUSG00000040021	Lats1
ENSMUSG00000019794	Katna1
ENSMUSG00000085211	B430219N15Rik
ENSMUSG00000097597	Gm26674
ENSMUSG00000090112	Shprh
ENSMUSG00000047648	Fbxo30
ENSMUSG00000019817	Plagl1
ENSMUSG00000019808	Adat2
ENSMUSG00000015501	Hivep2
ENSMUSG00000039910	Cited2
ENSMUSG00000019854	Reps1
ENSMUSG00000096977	Gm10827
ENSMUSG00000019851	Perp
ENSMUSG00000071369	Map3k5
ENSMUSG00000019996	Map7
ENSMUSG00000037608	Bclaf1
ENSMUSG00000019970	Sgk1
ENSMUSG00000053219	Raet1e
ENSMUSG00000075297	H60b
ENSMUSG00000019997	Ctgf
ENSMUSG00000019984	Med23
ENSMUSG00000039098	Gm9767
ENSMUSG00000019889	Ptprk
ENSMUSG00000000295	Hddc2
ENSMUSG00000090087	Gm15939
ENSMUSG00000039552	Rsph4a
ENSMUSG00000047514	Tspyl1
ENSMUSG00000039485	Tspyl4
ENSMUSG00000044499	Hs3st5
ENSMUSG00000019777	Hdac2
ENSMUSG00000046463	5930403N24Rik
ENSMUSG00000019846	Lama4
ENSMUSG00000019845	Tube1
ENSMUSG00000019843	Fyn
ENSMUSG00000019841	Rev3l
ENSMUSG00000097890	4930547M16Rik
ENSMUSG00000106147	Rnu3a
ENSMUSG00000065870	Rnu3a
ENSMUSG00000038481	Cdk19
ENSMUSG00000019831	Wasf1
ENSMUSG00000091415	Ak9
ENSMUSG00000019826	Zbtb24
ENSMUSG00000019823	Mical1
ENSMUSG00000078451	Ppil6
ENSMUSG00000019818	Cd164
ENSMUSG00000038332	Sesn1
ENSMUSG00000019804	Snx3
ENSMUSG00000038280	Ostm1
ENSMUSG00000019802	Sec63
ENSMUSG00000099893	Gm29245
ENSMUSG00000102062	Gm29246
ENSMUSG00000045008	9030612E09Rik
ENSMUSG00000038240	Pdss2
ENSMUSG00000047139	Cd24a
ENSMUSG00000038160	Atg5
ENSMUSG00000019849	Prep
ENSMUSG00000019891	Dcbld1
ENSMUSG00000038602	Slc35f1
ENSMUSG00000019857	Asf1a
ENSMUSG00000050953	Gja1
ENSMUSG00000003226	Ranbp2
ENSMUSG00000038010	Ccdc138
ENSMUSG00000037990	Sh3rf3
ENSMUSG00000107372	NA
ENSMUSG00000098188	Sowahc
ENSMUSG00000019916	P4ha1
ENSMUSG00000020109	Dnajb12
ENSMUSG00000044475	Ascc1
ENSMUSG00000037171	Nodal
ENSMUSG00000037151	Lrrc20
ENSMUSG00000020089	Ppa1
ENSMUSG00000020088	Sar1a
ENSMUSG00000020087	Tysnd1
ENSMUSG00000044312	Neurog3
ENSMUSG00000085347	Hk1os
ENSMUSG00000097129	4930507D05Rik
ENSMUSG00000105203	4933428P19Rik
ENSMUSG00000088674	Gm22803
ENSMUSG00000071253	Slc25a16
ENSMUSG00000036875	Dna2
ENSMUSG00000020070	Rufy2
ENSMUSG00000020072	Pbld2
ENSMUSG00000036816	Atoh7
ENSMUSG00000020064	Herc4
ENSMUSG00000037876	Jmjd1c
ENSMUSG00000037868	Egr2
ENSMUSG00000037846	Rtkn2
ENSMUSG00000019944	Rhobtb1
ENSMUSG00000069601	Ank3
ENSMUSG00000048701	Ccdc6
ENSMUSG00000037762	Slc16a9
ENSMUSG00000043259	Fam13c
ENSMUSG00000060733	Ipmk
ENSMUSG00000040009	Gnaz
ENSMUSG00000020175	Rab36
ENSMUSG00000009681	Bcr
ENSMUSG00000020180	Snrpd3
ENSMUSG00000006345	Ggt1
ENSMUSG00000009092	Derl3
ENSMUSG00000049422	Chchd10
ENSMUSG00000049764	Zfp280b
ENSMUSG00000001150	Mcm3ap
ENSMUSG00000033105	Lss
ENSMUSG00000001436	Slc19a1
ENSMUSG00000020260	Pofut2
ENSMUSG00000009291	Pttg1ip
ENSMUSG00000020265	Sumo3
ENSMUSG00000009293	Ube2g2
ENSMUSG00000020284	1810043G02Rik
ENSMUSG00000000730	Dnmt3l
ENSMUSG00000000732	Icosl
ENSMUSG00000005054	Cstb
ENSMUSG00000032763	Ilvbl
ENSMUSG00000020308	Tpgs1
ENSMUSG00000020307	Cdc34
ENSMUSG00000020331	Hcn2
ENSMUSG00000020327	Fgf22
ENSMUSG00000020325	Fstl3
ENSMUSG00000035863	Palm
ENSMUSG00000006498	Ptbp1
ENSMUSG00000098562	Mir6910
ENSMUSG00000019564	Arid3a
ENSMUSG00000035754	Wdr18
ENSMUSG00000095615	Gm26243
ENSMUSG00000035722	Abca7
ENSMUSG00000075706	Gpx4
ENSMUSG00000003068	Stk11
ENSMUSG00000003072	Atp5d
ENSMUSG00000035621	Midn
ENSMUSG00000045193	Cirbp
ENSMUSG00000035595	1600002K03Rik
ENSMUSG00000020156	Mum1
ENSMUSG00000020153	Ndufs7
ENSMUSG00000069565	Dazap1
ENSMUSG00000063457	Rps15
ENSMUSG00000020135	Apc2
ENSMUSG00000035504	Reep6
ENSMUSG00000035486	Plk5
ENSMUSG00000045518	Onecut3
ENSMUSG00000097013	Gm26710
ENSMUSG00000035370	Adat3
ENSMUSG00000078441	Scamp4
ENSMUSG00000003345	Csnk1g2
ENSMUSG00000055862	Izumo4
ENSMUSG00000061589	Dot1l
ENSMUSG00000020211	Sf3a2
ENSMUSG00000035242	Oaz1
ENSMUSG00000087993	Mir1982
ENSMUSG00000035206	Sppl2b
ENSMUSG00000015312	Gadd45b
ENSMUSG00000004929	Thop1
ENSMUSG00000093498	Mir5615-2
ENSMUSG00000035027	Map2k2
ENSMUSG00000035011	Zbtb7a
ENSMUSG00000034994	Eef2
ENSMUSG00000064441	Snord37
ENSMUSG00000034974	Dapk3
ENSMUSG00000085779	Atcayos
ENSMUSG00000004931	Apba3
ENSMUSG00000034902	Pip5k1c
ENSMUSG00000034889	Cactin
ENSMUSG00000034854	Mfsd12
ENSMUSG00000078440	Dohh
ENSMUSG00000098811	Mir6913
ENSMUSG00000085327	Gm16104
ENSMUSG00000034771	Tle2
ENSMUSG00000074862	BC025920
ENSMUSG00000054708	Ankrd24
ENSMUSG00000078435	AU041133
ENSMUSG00000087481	Gm15608
ENSMUSG00000034674	Tdg
ENSMUSG00000020246	Hcfc2
ENSMUSG00000056821	1700028I16Rik
ENSMUSG00000020250	Txnrd1
ENSMUSG00000034612	Chst11
ENSMUSG00000020255	D10Wsu102e
ENSMUSG00000020034	Tcp11l2
ENSMUSG00000034453	Polr3b
ENSMUSG00000020037	Rfx4
ENSMUSG00000035620	Ric8b
ENSMUSG00000060935	Tmem263
ENSMUSG00000020042	Btbd11
ENSMUSG00000001785	Pwp1
ENSMUSG00000085111	Ascl4
ENSMUSG00000001786	Fbxo7
ENSMUSG00000097412	1810014B01Rik
ENSMUSG00000044937	Ttc41
ENSMUSG00000035351	Nup37
ENSMUSG00000020056	Ccdc53
ENSMUSG00000035311	Gnptab
ENSMUSG00000060904	Arl1
ENSMUSG00000097383	1500026H17Rik
ENSMUSG00000019951	Uhrf1bp1l
ENSMUSG00000019975	Ikbip
ENSMUSG00000020015	Cdk17
ENSMUSG00000089214	Mir1931
ENSMUSG00000015889	Lta4h
ENSMUSG00000097407	4933408J17Rik
ENSMUSG00000020021	Fgd6
ENSMUSG00000020022	Ndufa12
ENSMUSG00000020023	Tmcc3
ENSMUSG00000020024	Cep83
ENSMUSG00000097766	5730420D15Rik
ENSMUSG00000074781	Ube2n
ENSMUSG00000036499	Eea1
ENSMUSG00000036478	Btg1
ENSMUSG00000019943	Atp2b1
ENSMUSG00000019952	Poc1b
ENSMUSG00000090035	Galnt4
ENSMUSG00000019960	Dusp6
ENSMUSG00000019966	Kitl
ENSMUSG00000019971	Cep290
ENSMUSG00000019894	Slc6a15
ENSMUSG00000085282	Gm15663
ENSMUSG00000019897	Ccdc59
ENSMUSG00000019907	Ppp1r12a
ENSMUSG00000035873	Pawr
ENSMUSG00000093762	Gm25591
ENSMUSG00000020185	E2f7
ENSMUSG00000020186	Csrp2
ENSMUSG00000020189	Osbpl8
ENSMUSG00000035759	Bbs10
ENSMUSG00000058799	Nap1l1
ENSMUSG00000020205	Phlda1
ENSMUSG00000063334	Krr1
ENSMUSG00000035681	Kcnc2
ENSMUSG00000097185	Gm26596
ENSMUSG00000034163	Zfc3h1
ENSMUSG00000020151	Ptprr
ENSMUSG00000020154	Ptprb
ENSMUSG00000052291	5330438D12Rik
ENSMUSG00000097104	Gm26579
ENSMUSG00000020183	Cpm
ENSMUSG00000034813	Grip1
ENSMUSG00000020225	Tmbim4
ENSMUSG00000020218	Wif1
ENSMUSG00000034707	Gns
ENSMUSG00000047642	D930020B18Rik
ENSMUSG00000053684	BC048403
ENSMUSG00000044071	Fam19a2
ENSMUSG00000020105	Lrig3
ENSMUSG00000078429	Ctdsp2
ENSMUSG00000006732	Mettl1
ENSMUSG00000006724	Cyp27b1
ENSMUSG00000006728	Cdk4
ENSMUSG00000025422	Agap2
ENSMUSG00000006731	B4galnt1
ENSMUSG00000097331	F420014N23Rik
ENSMUSG00000092593	Gm20492
ENSMUSG00000025408	Ddit3
ENSMUSG00000098057	Gm6283
ENSMUSG00000025404	R3hdm2
ENSMUSG00000040287	Stac3
ENSMUSG00000040280	Ndufa4l2
ENSMUSG00000085731	Gm16229
ENSMUSG00000040195	Tmem194
ENSMUSG00000025401	Myo1a
ENSMUSG00000025395	Prim1
ENSMUSG00000061315	Naca
ENSMUSG00000071072	Ptges3
ENSMUSG00000025393	Atp5b
ENSMUSG00000064778	Snord59a
ENSMUSG00000104755	Mir677
ENSMUSG00000093245	Mir677
ENSMUSG00000040054	Baz2a
ENSMUSG00000044005	Gls2
ENSMUSG00000039994	Timeless
ENSMUSG00000040033	Stat2
ENSMUSG00000005682	Pan2
ENSMUSG00000025381	Cnpy2
ENSMUSG00000005683	Cs
ENSMUSG00000014498	Ankrd52
ENSMUSG00000025373	Rnf41
ENSMUSG00000098957	Mir8105
ENSMUSG00000025369	Smarcc2
ENSMUSG00000100548	Gm29585
ENSMUSG00000064030	Pym1
ENSMUSG00000025354	Dnajc14
ENSMUSG00000078427	Sarnp
ENSMUSG00000025348	Itga7
ENSMUSG00000075327	Zbtb2
ENSMUSG00000019763	Rmnd1
ENSMUSG00000096054	Syne1
ENSMUSG00000019773	Fbxo5
ENSMUSG00000019774	Mtrf1l
ENSMUSG00000015202	Cnksr3
ENSMUSG00000019795	Pcmt1
ENSMUSG00000040006	Ginm1
ENSMUSG00000015755	Tab2
ENSMUSG00000015305	Sash1
ENSMUSG00000097007	4930432B10Rik
ENSMUSG00000097378	B230208H11Rik
ENSMUSG00000098635	Gm27741
ENSMUSG00000019814	Ltv1
ENSMUSG00000019809	Pex3
ENSMUSG00000039116	Adgrg6
ENSMUSG00000039879	Heca
ENSMUSG00000059554	Ccdc28a
ENSMUSG00000019850	Tnfaip3
ENSMUSG00000050473	Slc35d3
ENSMUSG00000069713	4933406P04Rik
ENSMUSG00000019982	Myb
ENSMUSG00000097107	Platr6
ENSMUSG00000097327	E030030I06Rik
ENSMUSG00000071359	Tbpl1
ENSMUSG00000061983	Rps12
ENSMUSG00000070063	Snora33
ENSMUSG00000080486	Snord100
ENSMUSG00000077440	Gm23130
ENSMUSG00000087400	Gm15270
ENSMUSG00000019989	Enpp3
ENSMUSG00000049420	Tmem200a
ENSMUSG00000075266	Cenpw
ENSMUSG00000019792	Trmt11
ENSMUSG00000019791	Hint3
ENSMUSG00000039697	Ncoa7
ENSMUSG00000019789	Hey2
ENSMUSG00000000296	Tpd52l1
ENSMUSG00000069670	Nkain2
ENSMUSG00000019785	Clvs2
ENSMUSG00000019782	Rwdd1
ENSMUSG00000039497	Dse
ENSMUSG00000097274	Gm26564
ENSMUSG00000069662	Marcks
ENSMUSG00000051736	Fam229b
ENSMUSG00000087177	E130307A14Rik
ENSMUSG00000096687	AA474331
ENSMUSG00000071335	G630090E17Rik
ENSMUSG00000038510	Rpf2
ENSMUSG00000019837	Gtf3c6
ENSMUSG00000075232	Amd1
ENSMUSG00000038491	Cdk19os
ENSMUSG00000038446	Cdc40
ENSMUSG00000038417	Fig4
ENSMUSG00000019822	Smpd2
ENSMUSG00000019813	Cep57l1
ENSMUSG00000048756	Foxo3
ENSMUSG00000038302	Lace1
ENSMUSG00000019803	Nr2e1
ENSMUSG00000097008	Gm26860
ENSMUSG00000038248	Sobp
ENSMUSG00000019797	1700021F05Rik
ENSMUSG00000058298	Mcm9
ENSMUSG00000019877	Serinc1
ENSMUSG00000075046	Duxf3
ENSMUSG00000055958	Gm9987
ENSMUSG00000019917	2010-09-01
ENSMUSG00000020108	Ddit4
ENSMUSG00000020107	Anapc16
ENSMUSG00000057337	Chst3
ENSMUSG00000012819	Cdh23
ENSMUSG00000020099	Unc5b
ENSMUSG00000020097	Sgpl1
ENSMUSG00000059901	Adamts14
ENSMUSG00000020092	Pald1
ENSMUSG00000020091	Eif4ebp2
ENSMUSG00000043126	D830039M14Rik
ENSMUSG00000020086	H2afy2
ENSMUSG00000020083	2010107G23Rik
ENSMUSG00000037031	Tspan15
ENSMUSG00000037012	Hk1
ENSMUSG00000020079	Supv3l1
ENSMUSG00000020078	Vps26a
ENSMUSG00000036955	Kif1bp
ENSMUSG00000020075	Ddx21
ENSMUSG00000020076	Ddx50
ENSMUSG00000036923	Stox1
ENSMUSG00000020074	Ccar1
ENSMUSG00000047146	Tet1
ENSMUSG00000084569	Gm26479
ENSMUSG00000020069	Hnrnph3
ENSMUSG00000045391	1700120B22Rik
ENSMUSG00000020063	Sirt1
ENSMUSG00000019873	Reep3
ENSMUSG00000075000	Nrbf2
ENSMUSG00000057134	Ado
ENSMUSG00000037855	Zfp365
ENSMUSG00000090622	A930033H14Rik
ENSMUSG00000019942	Cdk1
ENSMUSG00000037747	Phyhipl
ENSMUSG00000014329	Bicc1
ENSMUSG00000003923	Tfam
ENSMUSG00000019927	Ube2d1
ENSMUSG00000037710	Cisd1
ENSMUSG00000033416	Gucd1
ENSMUSG00000046807	Lrrc75b
ENSMUSG00000020196	Cabin1
ENSMUSG00000092360	Gm20441
ENSMUSG00000001665	Gstt3
ENSMUSG00000033307	Mif
ENSMUSG00000000902	Smarcb1
ENSMUSG00000050157	Gm867
ENSMUSG00000085662	Gm16220
ENSMUSG00000020230	Prmt2
ENSMUSG00000001151	Pcnt
ENSMUSG00000033126	Ybey
ENSMUSG00000001435	Col18a1
ENSMUSG00000078444	Gm10941
ENSMUSG00000020262	Adarb1
ENSMUSG00000032977	Fam207a
ENSMUSG00000051652	Lrrc3
ENSMUSG00000020277	Pfkl
ENSMUSG00000032834	Pwp2
ENSMUSG00000000374	Trappc10
ENSMUSG00000001211	Agpat3
ENSMUSG00000061032	Rrp1
ENSMUSG00000032788	Pdxk
ENSMUSG00000052151	Plpp2
ENSMUSG00000045912	C2cd4c
ENSMUSG00000020329	Polrmt
ENSMUSG00000035890	Rnf126
ENSMUSG00000091994	E130317F20Rik
ENSMUSG00000090860	Gm17134
ENSMUSG00000035835	Plppr3
ENSMUSG00000013858	Tmem259
ENSMUSG00000004667	Polr2e
ENSMUSG00000035640	Cbarp
ENSMUSG00000020150	Gamt
ENSMUSG00000020133	2310011J03Rik
ENSMUSG00000020131	Pcsk4
ENSMUSG00000048696	Mex3d
ENSMUSG00000035478	Mbd3
ENSMUSG00000020163	Uqcr11
ENSMUSG00000020167	Tcf3
ENSMUSG00000047417	Rexo1
ENSMUSG00000035397	Klf16
ENSMUSG00000003346	Abhd17a
ENSMUSG00000100201	Gm29093
ENSMUSG00000020190	Mknk2
ENSMUSG00000003348	Mob3a
ENSMUSG00000020198	Ap3d1
ENSMUSG00000035278	Plekhj1
ENSMUSG00000035215	Lsm7
ENSMUSG00000020219	Timm13
ENSMUSG00000062075	Lmnb2
ENSMUSG00000046822	Slc39a3
ENSMUSG00000004937	Sgta
ENSMUSG00000106347	Mir5615-1
ENSMUSG00000004934	Pias4
ENSMUSG00000053603	4930442H23Rik
ENSMUSG00000034932	Mrpl54
ENSMUSG00000034917	Tjp3
ENSMUSG00000020232	Hmg20b
ENSMUSG00000020234	4930404N11Rik
ENSMUSG00000020235	Fzr1
ENSMUSG00000055053	Nfic
ENSMUSG00000105379	Mir1191b
ENSMUSG00000034818	Celf5
ENSMUSG00000020238	Ncln
ENSMUSG00000034792	Gna15
ENSMUSG00000034748	Sirt6
ENSMUSG00000034591	Slc41a2
ENSMUSG00000020256	Aldh1l2
ENSMUSG00000020032	Nuak1
ENSMUSG00000046841	Ckap4
ENSMUSG00000097309	Gm17249
ENSMUSG00000050035	Fhl4
ENSMUSG00000020038	Cry1
ENSMUSG00000035529	Prdm4
ENSMUSG00000001783	Rtcb
ENSMUSG00000097692	A230060F14Rik
ENSMUSG00000020048	Hsp90b1
ENSMUSG00000092686	Gm25745
ENSMUSG00000020052	Ascl1
ENSMUSG00000035365	Parpbp
ENSMUSG00000020057	Dram1
ENSMUSG00000069540	Gm4925
ENSMUSG00000004356	Utp20
ENSMUSG00000074802	Gas2l3
ENSMUSG00000069539	Scyl2
ENSMUSG00000019948	Actr6
ENSMUSG00000019979	Apaf1
ENSMUSG00000061904	Slc25a3
ENSMUSG00000019961	Tmpo
ENSMUSG00000019988	Nedd1
ENSMUSG00000020018	Snrpf
ENSMUSG00000036099	Vezt
ENSMUSG00000097164	Cep83os
ENSMUSG00000074785	Plxnc1
ENSMUSG00000045867	Cradd
ENSMUSG00000020027	Socs2
ENSMUSG00000020029	Nudt4
ENSMUSG00000036676	Tmtc3
ENSMUSG00000036602	Alx1
ENSMUSG00000090638	Gm17028
ENSMUSG00000036019	Tmtc2
ENSMUSG00000036009	Mettl25
ENSMUSG00000035798	Zdhhc17
ENSMUSG00000100113	Gm28592
ENSMUSG00000074748	Atxn7l3b
ENSMUSG00000020130	Tbc1d15
ENSMUSG00000020132	Rab21
ENSMUSG00000020137	Thap2
ENSMUSG00000020140	Lgr5
ENSMUSG00000020166	Cnot2
ENSMUSG00000064181	Rab3ip
ENSMUSG00000020170	Frs2
ENSMUSG00000020171	Yeats4
ENSMUSG00000055531	Cpsf6
ENSMUSG00000020184	Mdm2
ENSMUSG00000052798	Nup107
ENSMUSG00000028630	Dyrk2
ENSMUSG00000020114	Cand1
ENSMUSG00000085454	Grip1os3
ENSMUSG00000020228	Helb
ENSMUSG00000020227	Irak3
ENSMUSG00000056758	Hmga2
ENSMUSG00000048661	Lemd3
ENSMUSG00000025795	Rassf3
ENSMUSG00000020115	Tbk1
ENSMUSG00000034667	Xpot
ENSMUSG00000020121	Srgap1
ENSMUSG00000034602	Mon2
ENSMUSG00000020124	Usp15
ENSMUSG00000099088	Gm27920
ENSMUSG00000025436	Xrcc6bp1
ENSMUSG00000040521	Tsfm
ENSMUSG00000080115	Mettl21b
ENSMUSG00000040502	2009-03-01
ENSMUSG00000040462	Os9
ENSMUSG00000019467	Arhgef25
ENSMUSG00000040415	Dtx3
ENSMUSG00000025417	Pip4k2c
ENSMUSG00000074657	Kif5a
ENSMUSG00000025409	Mbd6
ENSMUSG00000092384	Gm4189
ENSMUSG00000040354	Mars
ENSMUSG00000047492	Inhbe
ENSMUSG00000025403	Shmt2
ENSMUSG00000040249	Lrp1
ENSMUSG00000025402	Nab2
ENSMUSG00000051346	Spryd4
ENSMUSG00000097526	Gm26847
ENSMUSG00000039914	Coq10a
ENSMUSG00000088393	Gm26308
ENSMUSG00000025374	Nabp2
ENSMUSG00000025366	Esyt1
ENSMUSG00000039810	Zc3h10
ENSMUSG00000093674	Rpl41
ENSMUSG00000025364	Pa2g4
ENSMUSG00000018166	Erbb3
ENSMUSG00000025362	Rps26
ENSMUSG00000000711	Rab5b
ENSMUSG00000025357	Dgka
ENSMUSG00000047090	Tmem198b
ENSMUSG00000025353	Ormdl2
ENSMUSG00000025352	Gdf11
ENSMUSG00000090247	Bloc1s1
ENSMUSG00000025350	Rdh5
ENSMUSG00000020453	Patz1
ENSMUSG00000034614	Pik3ip1
ENSMUSG00000034587	8430429K09Rik
ENSMUSG00000084962	Gm11947
ENSMUSG00000034543	Morc2a
ENSMUSG00000020430	Pes1
ENSMUSG00000003581	Rnf215
ENSMUSG00000020424	Gatsl3
ENSMUSG00000020412	Ascc2
ENSMUSG00000009076	Zmat5
ENSMUSG00000034285	Nipsnap1
ENSMUSG00000034274	Thoc5
ENSMUSG00000034175	Rhbdd3
ENSMUSG00000085189	Gm11963
ENSMUSG00000020484	Xbp1
ENSMUSG00000020476	Dbnl
ENSMUSG00000020473	Aebp1
ENSMUSG00000096923	A730071L15Rik
ENSMUSG00000077524	n-R5s67
ENSMUSG00000020456	Ogdh
ENSMUSG00000041164	Zmiz2
ENSMUSG00000071866	Ppia
ENSMUSG00000086839	Gm11973
ENSMUSG00000000378	Ccm2
ENSMUSG00000020407	Upp1
ENSMUSG00000050830	Vwc2
ENSMUSG00000020191	4930415F15Rik
ENSMUSG00000020122	Egfr
ENSMUSG00000033953	Ppp3r1
ENSMUSG00000078970	Wdr92
ENSMUSG00000045671	Spred2
ENSMUSG00000020149	Rab1a
ENSMUSG00000049800	Sertad2
ENSMUSG00000020128	Vps54
ENSMUSG00000087253	Gm12043
ENSMUSG00000020319	Wdpcp
ENSMUSG00000049904	Tmem17
ENSMUSG00000092626	9130230N09Rik
ENSMUSG00000044068	Zrsr1
ENSMUSG00000007739	Cct4
ENSMUSG00000049811	Fam161a
ENSMUSG00000020290	Xpo1
ENSMUSG00000056342	Usp34
ENSMUSG00000020280	Pus10
ENSMUSG00000084769	Gm12061
ENSMUSG00000000861	Bcl11a
ENSMUSG00000020463	Smek2
ENSMUSG00000032740	Ccdc88a
ENSMUSG00000085165	Gm12089
ENSMUSG00000020459	Mtif2
ENSMUSG00000020461	Clhc1
ENSMUSG00000020458	Rtn4
ENSMUSG00000073073	Gm8098
ENSMUSG00000020300	Cpeb4
ENSMUSG00000040767	Snrnp25
ENSMUSG00000020271	Fbxw11
ENSMUSG00000087501	Gm12116
ENSMUSG00000018846	Pank3
ENSMUSG00000020328	Nudcd2
ENSMUSG00000020409	Slu7
ENSMUSG00000044707	Ccnjl
ENSMUSG00000045877	4933415A04Rik
ENSMUSG00000092889	Gm22121
ENSMUSG00000019189	Rnf145
ENSMUSG00000006169	Clint1
ENSMUSG00000040489	Sox30
ENSMUSG00000011256	Adam19
ENSMUSG00000020397	Med7
ENSMUSG00000020372	Gnb2l1
ENSMUSG00000064500	Gm25296
ENSMUSG00000064725	Snord96a
ENSMUSG00000046311	Zfp62
ENSMUSG00000020357	Flt4
ENSMUSG00000020363	Gfpt2
ENSMUSG00000020366	Mapk9
ENSMUSG00000020376	Rnf130
ENSMUSG00000020381	3010026O09Rik
ENSMUSG00000036620	Mgat4b
ENSMUSG00000097887	Gm26542
ENSMUSG00000007850	Hnrnph1
ENSMUSG00000036545	Adamts2
ENSMUSG00000020364	Zfp354a
ENSMUSG00000020385	Clk4
ENSMUSG00000020359	Phykpl
ENSMUSG00000052563	D930048N14Rik
ENSMUSG00000020392	Cdkn2aipnl
ENSMUSG00000086493	Gm12204
ENSMUSG00000020349	Ppp2ca
ENSMUSG00000036309	Skp1a
ENSMUSG00000086920	Gm12207
ENSMUSG00000020402	Vdac1
ENSMUSG00000036275	9530068E07Rik
ENSMUSG00000036264	Fstl4
ENSMUSG00000049470	Aff4
ENSMUSG00000018387	Shroom1
ENSMUSG00000054450	Gm9945
ENSMUSG00000018398	2008-09-01
ENSMUSG00000018899	Irf1
ENSMUSG00000018906	P4ha2
ENSMUSG00000035992	Fnip1
ENSMUSG00000020267	Hint1
ENSMUSG00000020261	Slc36a1
ENSMUSG00000018583	G3bp1
ENSMUSG00000020522	Mfap3
ENSMUSG00000020520	Galnt10
ENSMUSG00000020519	Sap30l
ENSMUSG00000037331	Larp1
ENSMUSG00000020515	Cnot8
ENSMUSG00000020514	Mrpl22
ENSMUSG00000037243	Zfp692
ENSMUSG00000087347	1700047K16Rik
ENSMUSG00000013646	Sh3bp5l
ENSMUSG00000085744	Gm12259
ENSMUSG00000020491	2810021J22Rik
ENSMUSG00000056895	Hist3h2ba
ENSMUSG00000020455	Trim11
ENSMUSG00000020441	2310033P09Rik
ENSMUSG00000036819	Jmjd4
ENSMUSG00000072893	4933439C10Rik
ENSMUSG00000087249	Gm16062
ENSMUSG00000032615	Nt5m
ENSMUSG00000062115	Rai1
ENSMUSG00000056598	Lrrc48
ENSMUSG00000018415	Gid4
ENSMUSG00000020537	Drg2
ENSMUSG00000042650	Alkbh5
ENSMUSG00000020536	Llgl1
ENSMUSG00000018599	Mief2
ENSMUSG00000092734	Mir5100
ENSMUSG00000049323	Smcr8
ENSMUSG00000042569	Dhrs7b
ENSMUSG00000097747	Gm26534
ENSMUSG00000018932	Map2k3
ENSMUSG00000042529	Kcnj12
ENSMUSG00000001039	B9d1
ENSMUSG00000042331	Specc1
ENSMUSG00000018500	Adora2b
ENSMUSG00000042298	Ttc19
ENSMUSG00000014245	Pigl
ENSMUSG00000019505	Ubb
ENSMUSG00000018507	Trpv2
ENSMUSG00000086841	2410006H16Rik
ENSMUSG00000064437	Snord49b
ENSMUSG00000065734	Snord49a
ENSMUSG00000077457	Snord65
ENSMUSG00000048497	Mmgt2
ENSMUSG00000047821	Trim16
ENSMUSG00000090173	Fbxw10
ENSMUSG00000014177	Tvp23b
ENSMUSG00000018217	Pmp22
ENSMUSG00000047759	Hs3st3a1
ENSMUSG00000018347	Zkscan6
ENSMUSG00000084967	Gm12296
ENSMUSG00000069844	Sco1
ENSMUSG00000055134	9130017K11Rik
ENSMUSG00000020900	Myh10
ENSMUSG00000020898	Ctc1
ENSMUSG00000020897	Aurkb
ENSMUSG00000045176	Borcs6
ENSMUSG00000020894	Vamp2
ENSMUSG00000020893	Per1
ENSMUSG00000023781	Hes7
ENSMUSG00000049299	Trappc1
ENSMUSG00000043419	Chd3os
ENSMUSG00000085178	Kdm6bos
ENSMUSG00000059552	Trp53
ENSMUSG00000018765	Fxr2
ENSMUSG00000088752	Mir1934
ENSMUSG00000085890	Tnfsf13os
ENSMUSG00000018750	Zbtb4
ENSMUSG00000070394	Tmem256
ENSMUSG00000047284	Neurl4
ENSMUSG00000023170	Gps2
ENSMUSG00000018569	Cldn7
ENSMUSG00000105100	Gm44349
ENSMUSG00000018559	Ctdnep1
ENSMUSG00000018567	Gabarap
ENSMUSG00000018572	Phf23
ENSMUSG00000020888	Dvl2
ENSMUSG00000060216	Arrb2
ENSMUSG00000046811	Gltpd2
ENSMUSG00000018286	Psmb6
ENSMUSG00000020827	Mink1
ENSMUSG00000020821	Kif1c
ENSMUSG00000043602	Zfp3
ENSMUSG00000020817	Rabep1
ENSMUSG00000018449	Rpain
ENSMUSG00000020803	Txndc17
ENSMUSG00000053574	4930563E22Rik
ENSMUSG00000040463	Mybbp1a
ENSMUSG00000020794	Ube2g1
ENSMUSG00000020790	Ankfy1
ENSMUSG00000055670	Zzef1
ENSMUSG00000020788	Atp2a3
ENSMUSG00000020785	Camkk1
ENSMUSG00000020783	Ncbp3
ENSMUSG00000040158	Tax1bp3
ENSMUSG00000005951	Shpk
ENSMUSG00000069825	Spata22
ENSMUSG00000020741	Cluh
ENSMUSG00000010554	Mettl16
ENSMUSG00000000282	Mnt
ENSMUSG00000038335	Tsr1
ENSMUSG00000038290	Smg6
ENSMUSG00000085609	1700016P03Rik
ENSMUSG00000065590	Mir212
ENSMUSG00000065537	Mir132
ENSMUSG00000045287	Rtn4rl1
ENSMUSG00000018809	Smyd4
ENSMUSG00000085148	Mir22hg
ENSMUSG00000038217	Tlcd2
ENSMUSG00000020850	Prpf8
ENSMUSG00000038195	Rilp
ENSMUSG00000038178	Slc43a2
ENSMUSG00000017781	Pitpna
ENSMUSG00000017774	Myo1c
ENSMUSG00000017776	Crk
ENSMUSG00000020849	Ywhae
ENSMUSG00000069808	Fam57a
ENSMUSG00000038057	Dbil5
ENSMUSG00000038046	Rnmtl1
ENSMUSG00000020843	Timm22
ENSMUSG00000044243	Bhlha9
ENSMUSG00000037926	Ssh2
ENSMUSG00000097165	2210008F06Rik
ENSMUSG00000011877	Git1
ENSMUSG00000000686	Abhd15
ENSMUSG00000037857	Nufip2
ENSMUSG00000000631	Myo18a
ENSMUSG00000000632	Sez6
ENSMUSG00000037791	Phf12
ENSMUSG00000061981	Flot2
ENSMUSG00000037750	Fam222b
ENSMUSG00000019437	Tlcd1
ENSMUSG00000099101	Mir7653
ENSMUSG00000002059	Rab34
ENSMUSG00000002064	Sdf2
ENSMUSG00000010277	2610507B11Rik
ENSMUSG00000002055	Spag5
ENSMUSG00000001100	Poldip2
ENSMUSG00000001105	Ift20
ENSMUSG00000020716	Nf1
ENSMUSG00000017548	Suz12
ENSMUSG00000017550	Atad5
ENSMUSG00000017686	Rhot1
ENSMUSG00000017692	Rhbdl3
ENSMUSG00000017421	Zfp207
ENSMUSG00000017428	Psmd11
ENSMUSG00000048895	Cdk5r1
ENSMUSG00000020701	Tmem132e
ENSMUSG00000046010	Zfp830
ENSMUSG00000035152	Ap2b1
ENSMUSG00000035085	1700020L24Rik
ENSMUSG00000020680	Taf15
ENSMUSG00000000976	Heatr6
ENSMUSG00000020532	Acaca
ENSMUSG00000086799	4930502E09Rik
ENSMUSG00000085628	Appbp2os
ENSMUSG00000020525	Ppm1d
ENSMUSG00000059439	Bcas3
ENSMUSG00000000093	Tbx2
ENSMUSG00000020521	Rnft1
ENSMUSG00000020513	Tubd1
ENSMUSG00000072582	Ptrh2
ENSMUSG00000020492	Ska2
ENSMUSG00000018548	Trim37
ENSMUSG00000105025	Rnu3b1
ENSMUSG00000098943	Rnu3b1
ENSMUSG00000018401	Mtmr4
ENSMUSG00000070345	Hsf5
ENSMUSG00000034156	Bzrap1
ENSMUSG00000018379	Srsf1
ENSMUSG00000018377	Vezf1
ENSMUSG00000018378	Cuedc1
ENSMUSG00000023723	Mrps23
ENSMUSG00000081766	2210409E12Rik
ENSMUSG00000033983	Coil
ENSMUSG00000000275	Trim25
ENSMUSG00000063109	Dgkeos
ENSMUSG00000085798	Gm2018
ENSMUSG00000020544	Cox11
ENSMUSG00000059474	Mbtd1
ENSMUSG00000020859	Spag9
ENSMUSG00000037573	Tob1
ENSMUSG00000020864	Ankrd40
ENSMUSG00000020869	Lrrc59
ENSMUSG00000089404	Gm24877
ENSMUSG00000038976	Ppp1r9b
ENSMUSG00000047181	Samd14
ENSMUSG00000001510	Dlx3
ENSMUSG00000085143	Gm11520
ENSMUSG00000038893	Fam117a
ENSMUSG00000020873	Slc35b1
ENSMUSG00000057522	Spop
ENSMUSG00000038845	Phb
ENSMUSG00000075595	Zfp652
ENSMUSG00000050860	Phospho1
ENSMUSG00000086015	4833417C18Rik
ENSMUSG00000099928	Gm29202
ENSMUSG00000006058	Snf8
ENSMUSG00000078706	Gm53
ENSMUSG00000000690	Hoxb6
ENSMUSG00000038700	Hoxb5
ENSMUSG00000048763	Hoxb3
ENSMUSG00000018666	Cbx1
ENSMUSG00000018672	Copz2
ENSMUSG00000065515	Mir152
ENSMUSG00000078700	D030028A08Rik
ENSMUSG00000047040	Prr15l
ENSMUSG00000038560	Sp6
ENSMUSG00000020877	Scrn2
ENSMUSG00000038534	Osbpl7
ENSMUSG00000086680	Gm11592
ENSMUSG00000038485	Socs7
ENSMUSG00000049807	Arhgap23
ENSMUSG00000085860	2410003L11Rik
ENSMUSG00000038437	Mllt6
ENSMUSG00000078695	Cisd3
ENSMUSG00000069744	Psmb3
ENSMUSG00000098919	Mir8102
ENSMUSG00000084168	Atp5l2-ps
ENSMUSG00000038366	Lasp1
ENSMUSG00000050538	B230217C12Rik
ENSMUSG00000086917	Gm11630
ENSMUSG00000086716	Gm11629
ENSMUSG00000017404	Rpl19
ENSMUSG00000003119	Cdk12
ENSMUSG00000061718	Ppp1r1b
ENSMUSG00000018167	Stard3
ENSMUSG00000038216	Pnmt
ENSMUSG00000062312	Erbb2
ENSMUSG00000019312	Grb7
ENSMUSG00000017195	Zpbp2
ENSMUSG00000017221	Psmd3
ENSMUSG00000052915	Msl1
ENSMUSG00000078676	Casc3
ENSMUSG00000038020	Rapgefl1
ENSMUSG00000038013	Wipf2
ENSMUSG00000017499	Cdc6
ENSMUSG00000037992	Rara
ENSMUSG00000087692	Gm11940
ENSMUSG00000017837	Nkiras2
ENSMUSG00000017832	Hspb9
ENSMUSG00000019302	Atp6v0a1
ENSMUSG00000001751	Naglu
ENSMUSG00000019301	Hsd17b1
ENSMUSG00000001755	Coasy
ENSMUSG00000017801	Mlx
ENSMUSG00000035198	Tubg1
ENSMUSG00000017167	Cntnap1
ENSMUSG00000078656	Vps25
ENSMUSG00000078652	Psme3
ENSMUSG00000035007	Rundc1
ENSMUSG00000063316	Rpl27
ENSMUSG00000001313	Rnd2
ENSMUSG00000017119	Nbr1
ENSMUSG00000065820	Gm26316
ENSMUSG00000065944	Rnu2-10
ENSMUSG00000034931	Dhx8
ENSMUSG00000010841	1700006E09Rik
ENSMUSG00000048217	Nags
ENSMUSG00000034773	BC030867
ENSMUSG00000034757	Tmub2
ENSMUSG00000006575	Rundc3a
ENSMUSG00000034708	Grn
ENSMUSG00000050288	Fzd2
ENSMUSG00000051455	Meioc
ENSMUSG00000020926	Adam11
ENSMUSG00000020936	Nmt1
ENSMUSG00000056938	Acbd4
ENSMUSG00000048878	Hexim1
ENSMUSG00000043372	Hexim2
ENSMUSG00000085733	Arhgap27os1
ENSMUSG00000046215	Rprml
ENSMUSG00000085154	C130046K22Rik
ENSMUSG00000000125	Wnt3
ENSMUSG00000062421	Arf2
ENSMUSG00000018411	Mapt
ENSMUSG00000061086	Myl4
ENSMUSG00000020689	Itgb3
ENSMUSG00000020691	Mettl2
ENSMUSG00000053580	Tanc2
ENSMUSG00000103469	Gm9910
ENSMUSG00000020681	Ace
ENSMUSG00000001901	Kcnh6
ENSMUSG00000049354	Dcaf7
ENSMUSG00000020700	Map3k3
ENSMUSG00000075480	Gm10840
ENSMUSG00000020705	Ddx42
ENSMUSG00000020708	Psmc5
ENSMUSG00000065126	Snord104
ENSMUSG00000105884	Gm22711
ENSMUSG00000080540	Gm22711
ENSMUSG00000018372	Cep95
ENSMUSG00000020720	Psmd12
ENSMUSG00000020721	Helz
ENSMUSG00000000049	Apoh
ENSMUSG00000000142	Axin2
ENSMUSG00000020611	Gna13
ENSMUSG00000020610	Amz2
ENSMUSG00000020604	Arsg
ENSMUSG00000020612	Prkar1a
ENSMUSG00000041695	Kcnj2
ENSMUSG00000018661	Cog1
ENSMUSG00000041623	D11Wsu47e
ENSMUSG00000057322	Rpl38
ENSMUSG00000034706	Dnaic2
ENSMUSG00000010021	Kif19a
ENSMUSG00000051043	Gprc5c
ENSMUSG00000020732	Rab37
ENSMUSG00000020733	Slc9a3r1
ENSMUSG00000045980	Tmem104
ENSMUSG00000050910	Cdr2l
ENSMUSG00000018858	Ict1
ENSMUSG00000016940	Kctd2
ENSMUSG00000081376	Gm11694
ENSMUSG00000020739	Nup85
ENSMUSG00000046756	Mrps7
ENSMUSG00000097020	Gm26613
ENSMUSG00000020781	Tsen54
ENSMUSG00000020782	Llgl2
ENSMUSG00000034427	Myo15b
ENSMUSG00000020755	Sap30bp
ENSMUSG00000020758	Itgb4
ENSMUSG00000020770	Unk
ENSMUSG00000020778	Ten1
ENSMUSG00000050628	Ubald2
ENSMUSG00000061878	Sphk1
ENSMUSG00000020804	Aanat
ENSMUSG00000075410	Gm11744
ENSMUSG00000020812	1810032O08Rik
ENSMUSG00000065640	Snord1c
ENSMUSG00000090266	Mettl23
ENSMUSG00000020818	Mfsd11
ENSMUSG00000043857	Mgat5b
ENSMUSG00000086859	Snhg20
ENSMUSG00000088529	Gm26083
ENSMUSG00000104740	Mir6516
ENSMUSG00000059248	2009-09-01
ENSMUSG00000054418	2900041M22Rik
ENSMUSG00000025571	Tnrc6c
ENSMUSG00000050106	Tmc8
ENSMUSG00000048277	Syngr2
ENSMUSG00000093485	Gm20708
ENSMUSG00000017718	Afmid
ENSMUSG00000017716	Birc5
ENSMUSG00000017715	Pgs1
ENSMUSG00000033857	Engase
ENSMUSG00000025577	Cbx2
ENSMUSG00000039963	Ccdc40
ENSMUSG00000025579	Gaa
ENSMUSG00000088015	Mir1932
ENSMUSG00000070327	Rnf213
ENSMUSG00000039850	Endov
ENSMUSG00000087675	Gm11762
ENSMUSG00000025371	Chmp6
ENSMUSG00000086924	Gm11766
ENSMUSG00000025372	Baiap2
ENSMUSG00000078572	1810043H04Rik
ENSMUSG00000085636	Gm11769
ENSMUSG00000039741	Bahcc1
ENSMUSG00000043644	0610009L18Rik
ENSMUSG00000025380	Fscn2
ENSMUSG00000049957	Ccdc137
ENSMUSG00000039640	Mrpl12
ENSMUSG00000025792	Slc25a10
ENSMUSG00000025127	Gcgr
ENSMUSG00000102881	Gm3807
ENSMUSG00000025135	Anapc11
ENSMUSG00000044034	Npb
ENSMUSG00000097062	Gm17586
ENSMUSG00000084822	Myadml2os
ENSMUSG00000053613	Notumos
ENSMUSG00000025142	Aspscr1
ENSMUSG00000025145	Lrrc45
ENSMUSG00000018012	Rac3
ENSMUSG00000025156	Gps1
ENSMUSG00000025161	Slc16a3
ENSMUSG00000039329	Tex19.1
ENSMUSG00000039307	Hexdc
ENSMUSG00000000056	Narf
ENSMUSG00000039275	Foxk2
ENSMUSG00000039253	Fn3krp
ENSMUSG00000039230	Tbcd
ENSMUSG00000023764	Sfi1
ENSMUSG00000086049	Gm12735
ENSMUSG00000020451	Limk2
ENSMUSG00000020448	Rnf185
ENSMUSG00000020439	Smtn
ENSMUSG00000056579	Tug1
ENSMUSG00000048807	Slc35e4
ENSMUSG00000020419	Hormad2
ENSMUSG00000034354	Mtmr3
ENSMUSG00000059534	Uqcr10
ENSMUSG00000009075	Cabp7
ENSMUSG00000009073	Nf2
ENSMUSG00000020396	Nefh
ENSMUSG00000034201	Gas2l1
ENSMUSG00000009079	Ewsr1
ENSMUSG00000085232	Gm11962
ENSMUSG00000020482	Ccdc117
ENSMUSG00000020477	Mrps24
ENSMUSG00000020474	Polm
ENSMUSG00000057897	Camk2b
ENSMUSG00000053838	Nudcd3
ENSMUSG00000004394	Tmed4
ENSMUSG00000094483	Purb
ENSMUSG00000085156	Gm11974
ENSMUSG00000064513	Gm22457
ENSMUSG00000088688	Gm24000
ENSMUSG00000000384	Tbrg4
ENSMUSG00000020427	Igfbp3
ENSMUSG00000020413	Hus1
ENSMUSG00000020193	Zpbp
ENSMUSG00000035455	Fignl1
ENSMUSG00000020182	Ddc
ENSMUSG00000020176	Grb10
ENSMUSG00000020173	Cobl
ENSMUSG00000020116	Pno1
ENSMUSG00000020160	Meis1
ENSMUSG00000020152	Actr2
ENSMUSG00000044066	Cep68
ENSMUSG00000020142	Slc1a4
ENSMUSG00000049659	Aftph
ENSMUSG00000042363	Lgalsl
ENSMUSG00000086749	Gm12037
ENSMUSG00000001891	Ugp2
ENSMUSG00000020321	Mdh1
ENSMUSG00000005917	Otx1
ENSMUSG00000101716	Gm12057
ENSMUSG00000051650	B3gnt2
ENSMUSG00000051355	Commd1
ENSMUSG00000020283	Pex13
ENSMUSG00000020275	Rel
ENSMUSG00000020273	Papolg
ENSMUSG00000032985	5730522E02Rik
ENSMUSG00000032878	Ccdc85a
ENSMUSG00000086725	A630052C17Rik
ENSMUSG00000032673	Prorsd1
ENSMUSG00000020460	Rps27a
ENSMUSG00000044072	Eml6
ENSMUSG00000020315	Sptbn1
ENSMUSG00000060923	Acyp2
ENSMUSG00000020303	Stc2
ENSMUSG00000020289	Nprl3
ENSMUSG00000057967	Fgf18
ENSMUSG00000057113	Npm1
ENSMUSG00000040610	Tlx3
ENSMUSG00000040594	Ranbp17
ENSMUSG00000018849	Wwc1
ENSMUSG00000042032	Mat2b
ENSMUSG00000020330	Hmmr
ENSMUSG00000020326	Ccng1
ENSMUSG00000041231	Ublcp1
ENSMUSG00000020340	Cyfip2
ENSMUSG00000040365	Trim41
ENSMUSG00000086245	Gm16170
ENSMUSG00000040283	Btnl9
ENSMUSG00000020362	Cnot6
ENSMUSG00000020377	Ltc4s
ENSMUSG00000050567	Maml1
ENSMUSG00000020368	Canx
ENSMUSG00000020375	Rufy1
ENSMUSG00000085564	Gm12198
ENSMUSG00000049321	Zfp2
ENSMUSG00000086646	Platr20
ENSMUSG00000045942	BC049762
ENSMUSG00000020358	Hnrnpab
ENSMUSG00000001054	Rmnd5b
ENSMUSG00000001053	N4bp3
ENSMUSG00000007777	0610009B22Rik
ENSMUSG00000036391	Sec24a
ENSMUSG00000020387	Jade2
ENSMUSG00000020390	Ube2b
ENSMUSG00000093006	Gm24157
ENSMUSG00000000782	Tcf7
ENSMUSG00000020361	Hspa4
ENSMUSG00000044352	Sowaha
ENSMUSG00000020380	Rad50
ENSMUSG00000063652	Slc22a21
ENSMUSG00000020334	Slc22a4
ENSMUSG00000052298	Cdc42se2
ENSMUSG00000020268	Lyrm7
ENSMUSG00000018340	Anxa6
ENSMUSG00000018585	Atox1
ENSMUSG00000000263	Glra1
ENSMUSG00000020523	Fam114a2
ENSMUSG00000087165	2010001A14Rik
ENSMUSG00000037275	Gemin5
ENSMUSG00000049755	Zfp672
ENSMUSG00000020496	Rnf187
ENSMUSG00000085379	2310058D17Rik
ENSMUSG00000061462	Obscn
ENSMUSG00000020444	Guk1
ENSMUSG00000072898	Gm10434
ENSMUSG00000048076	Arf1
ENSMUSG00000009894	Snap47
ENSMUSG00000054519	Zfp867
ENSMUSG00000020472	Zkscan17
ENSMUSG00000043648	Pld6
ENSMUSG00000032633	Flcn
ENSMUSG00000019373	Cops3
ENSMUSG00000049892	Rasd1
ENSMUSG00000000301	Pemt
ENSMUSG00000020538	Srebf1
ENSMUSG00000098547	Mir6921
ENSMUSG00000000538	Tom1l2
ENSMUSG00000042709	Atpaf2
ENSMUSG00000002812	Flii
ENSMUSG00000002814	Top3a
ENSMUSG00000020534	Shmt1
ENSMUSG00000043284	Tmem11
ENSMUSG00000018931	Natd1
ENSMUSG00000042549	Map2k3os
ENSMUSG00000042506	Usp22
ENSMUSG00000010025	Aldh3a2
ENSMUSG00000001034	Mapk7
ENSMUSG00000060808	B9d1os
ENSMUSG00000001036	Epn2
ENSMUSG00000004798	Ulk2
ENSMUSG00000047804	Akap10
ENSMUSG00000014243	Zswim7
ENSMUSG00000018501	Ncor1
ENSMUSG00000018509	Cenpv
ENSMUSG00000087120	Gm12279
ENSMUSG00000046417	Lrrc75a
ENSMUSG00000070407	Hs3st3b1
ENSMUSG00000095224	F930015N05Rik
ENSMUSG00000056752	Dnah9
ENSMUSG00000020910	Adprm
ENSMUSG00000020905	Usp43
ENSMUSG00000020902	Ntn1
ENSMUSG00000018736	Ndel1
ENSMUSG00000052921	Arhgef15
ENSMUSG00000032892	Rangrf
ENSMUSG00000020899	Pfas
ENSMUSG00000072809	9330160F10Rik
ENSMUSG00000097386	9130213A22Rik
ENSMUSG00000020890	Gucy2e
ENSMUSG00000032782	Cntrob
ENSMUSG00000003934	Efnb3
ENSMUSG00000041346	Wrap53
ENSMUSG00000041329	Atp1b2
ENSMUSG00000083485	Gm12308
ENSMUSG00000083300	Gm12309
ENSMUSG00000018761	Mpdu1
ENSMUSG00000018774	Cd68
ENSMUSG00000059796	Eif4a1
ENSMUSG00000065862	Gm24029
ENSMUSG00000084708	Gm22988
ENSMUSG00000005204	Senp3
ENSMUSG00000005198	Polr2a
ENSMUSG00000042826	Fgf11
ENSMUSG00000089876	Tmem102
ENSMUSG00000051790	Nlgn2
ENSMUSG00000001588	Acap1
ENSMUSG00000018570	2810408A11Rik
ENSMUSG00000078812	Eif5a
ENSMUSG00000018565	Elp5
ENSMUSG00000020831	0610010K14Rik
ENSMUSG00000040904	Gm21988
ENSMUSG00000093989	Rnasek
ENSMUSG00000018921	Pelp1
ENSMUSG00000018293	Pfn1
ENSMUSG00000087523	Gm12319
ENSMUSG00000018287	Spag7
ENSMUSG00000040712	Camta2
ENSMUSG00000057054	Inca1
ENSMUSG00000082983	Gm12318
ENSMUSG00000076232	Gm22760
ENSMUSG00000040667	Nup88
ENSMUSG00000018446	C1qbp
ENSMUSG00000040620	Dhx33
ENSMUSG00000020807	4933427D14Rik
ENSMUSG00000107877	Gm43951
ENSMUSG00000020801	Med31
ENSMUSG00000045667	Smtnl2
ENSMUSG00000040447	Spns2
ENSMUSG00000057778	Cyb5d2
ENSMUSG00000086943	4732414G09Rik
ENSMUSG00000047260	Emc6
ENSMUSG00000005949	Ctns
ENSMUSG00000020774	Aspa
ENSMUSG00000038807	Rap1gap2
ENSMUSG00000020745	Pafah1b1
ENSMUSG00000038351	Sgsm2
ENSMUSG00000001323	Srr
ENSMUSG00000043099	Hic1
ENSMUSG00000078789	Dph1
ENSMUSG00000000751	Rpa1
ENSMUSG00000045374	Wdr81
ENSMUSG00000017288	Vps53
ENSMUSG00000017286	Glod4
ENSMUSG00000049396	Gemin4
ENSMUSG00000017631	Abr
ENSMUSG00000010392	Gosr1
ENSMUSG00000020841	Cpd
ENSMUSG00000037958	Nsrp1
ENSMUSG00000065518	Mir423
ENSMUSG00000037907	Ankrd13b
ENSMUSG00000044328	Trp53i13
ENSMUSG00000017291	Taok1
ENSMUSG00000017453	Pipox
ENSMUSG00000055045	Gm11190
ENSMUSG00000020832	Eral1
ENSMUSG00000017386	Traf4
ENSMUSG00000017405	Nek8
ENSMUSG00000058546	Rpl23a
ENSMUSG00000077625	Snord4a
ENSMUSG00000065676	Snord42b
ENSMUSG00000002052	Supt6
ENSMUSG00000051232	Tmem199
ENSMUSG00000017615	Tnfaip1
ENSMUSG00000037278	Tmem97
ENSMUSG00000049489	Fam58b
ENSMUSG00000018334	Ksr1
ENSMUSG00000017677	Wsb1
ENSMUSG00000035575	Utp6
ENSMUSG00000046909	Tefm
ENSMUSG00000057181	5730455P16Rik
ENSMUSG00000035441	Myo1d
ENSMUSG00000020704	Asic2
ENSMUSG00000020698	Cct6b
ENSMUSG00000020696	Rffl
ENSMUSG00000020692	Nle1
ENSMUSG00000018733	Pex12
ENSMUSG00000020682	Mmp28
ENSMUSG00000018651	Tada2a
ENSMUSG00000018405	Mrm1
ENSMUSG00000034449	Dhrs11
ENSMUSG00000020530	Ggnbp2
ENSMUSG00000020526	Znhit3
ENSMUSG00000018481	Appbp2
ENSMUSG00000087013	2610027K06Rik
ENSMUSG00000034297	Med13
ENSMUSG00000020516	Rps6kb1
ENSMUSG00000018171	Vmp1
ENSMUSG00000047126	Cltc
ENSMUSG00000018425	Dhx40
ENSMUSG00000018427	Ypel2
ENSMUSG00000061666	Gdpd1
ENSMUSG00000085991	Gm11479
ENSMUSG00000020495	Smg8
ENSMUSG00000020493	Prr11
ENSMUSG00000085310	Gm11491
ENSMUSG00000046442	Ppm1e
ENSMUSG00000088184	Gm23137
ENSMUSG00000020483	Dynll2
ENSMUSG00000086193	Gm11508
ENSMUSG00000096983	2010015M23Rik
ENSMUSG00000018428	Akap1
ENSMUSG00000000276	Dgke
ENSMUSG00000048616	Nog
ENSMUSG00000003949	Hlf
ENSMUSG00000020546	Stxbp4
ENSMUSG00000020541	Tom1l1
ENSMUSG00000054079	Utp18
ENSMUSG00000020857	Nme2
ENSMUSG00000091228	Gm20390
ENSMUSG00000037601	Nme1
ENSMUSG00000020863	Luc7l3
ENSMUSG00000020865	Abcc3
ENSMUSG00000020866	Cacna1g
ENSMUSG00000039110	Mycbpap
ENSMUSG00000039096	Rsad1
ENSMUSG00000001507	Itga3
ENSMUSG00000038909	Kat7
ENSMUSG00000085509	Gm11521
ENSMUSG00000101258	Gm29477
ENSMUSG00000046719	Nxph3
ENSMUSG00000000120	Ngfr
ENSMUSG00000086191	Zfp652os
ENSMUSG00000085578	Gm11527
ENSMUSG00000013415	Igf2bp1
ENSMUSG00000103376	Gm37179
ENSMUSG00000006057	Atp5g1
ENSMUSG00000075589	Gm11536
ENSMUSG00000020876	Snx11
ENSMUSG00000038615	Nfe2l1
ENSMUSG00000018669	Cdk5rap3
ENSMUSG00000018659	Pnpo
ENSMUSG00000018678	Sp2
ENSMUSG00000085262	Gm11574
ENSMUSG00000038517	Tbkbp1
ENSMUSG00000001440	Kpnb1
ENSMUSG00000001441	Npepps
ENSMUSG00000038453	Srcin1
ENSMUSG00000043439	E130012A19Rik
ENSMUSG00000085586	Gm11613
ENSMUSG00000093004	Gm24158
ENSMUSG00000018537	Pcgf2
ENSMUSG00000018547	Pip4k2b
ENSMUSG00000018541	Cwc25
ENSMUSG00000018543	1700001P01Rik
ENSMUSG00000071415	Rpl23
ENSMUSG00000098813	Gm27326
ENSMUSG00000064901	Snora21
ENSMUSG00000070336	Fbxo47
ENSMUSG00000017417	Plxdc1
ENSMUSG00000038352	Arl5c
ENSMUSG00000020882	Cacnb1
ENSMUSG00000017400	Stac2
ENSMUSG00000020883	Fbxl20
ENSMUSG00000018160	Med1
ENSMUSG00000085944	1700003D09Rik
ENSMUSG00000038208	Pgap3
ENSMUSG00000018168	Ikzf3
ENSMUSG00000038150	Ormdl3
ENSMUSG00000085955	Gm12356
ENSMUSG00000017210	Med24
ENSMUSG00000020889	Nr1d1
ENSMUSG00000075576	Gm12359
ENSMUSG00000047197	Gjd3
ENSMUSG00000020914	Top2a
ENSMUSG00000037935	Smarce1
ENSMUSG00000006930	Hap1
ENSMUSG00000091478	Gm10039
ENSMUSG00000001552	Jup
ENSMUSG00000048732	Klhl11
ENSMUSG00000020917	Acly
ENSMUSG00000014195	Dnajc7
ENSMUSG00000014198	Zfp385c
ENSMUSG00000020918	Kat2a
ENSMUSG00000035355	Kcnh4
ENSMUSG00000045471	Hcrt
ENSMUSG00000004040	Stat3
ENSMUSG00000004044	Ptrf
ENSMUSG00000019303	Psmc3ip
ENSMUSG00000017802	Fam134c
ENSMUSG00000035172	Plekhh3
ENSMUSG00000044052	Ccr10
ENSMUSG00000097239	Gm27029
ENSMUSG00000097487	Ptges3l
ENSMUSG00000034993	Vat1
ENSMUSG00000017146	Brca1
ENSMUSG00000017724	Etv4
ENSMUSG00000003518	Dusp3
ENSMUSG00000087339	Gm11586
ENSMUSG00000020921	Tmem101
ENSMUSG00000008855	Hdac5
ENSMUSG00000020923	Ubtf
ENSMUSG00000087330	Bloodlinc
ENSMUSG00000018677	Slc25a39
ENSMUSG00000034685	Fam171a2
ENSMUSG00000034520	Gjc1
ENSMUSG00000051378	Kif18b
ENSMUSG00000020935	Dcakd
ENSMUSG00000020937	Plcd3
ENSMUSG00000020941	Map3k14
ENSMUSG00000078635	1700028N14Rik
[truncated: 8,827 more rows]
