# Supplementary material for: PHF13 is a molecular reader and transcriptional co-regulator of H3K4me2/3
Source: eLife. 2016 May 25;5:e10607. doi: 10.7554/eLife.10607 (PMC4915813; doi:10.7554/eLife.10607)
Supplement: Figure 6—source data 2. — DOI: http://dx.doi.org/10.7554/eLife.10607.021 [file elife-10607-fig6-data2.xlsx]

## Sheet: ChIP-seq.targets.BP_FAT.txt
Category	Term	Count	%	PValue	Genes	List Total	Pop Hits	Pop Total	Fold Enrichment	Bonferroni	Benjamini	FDR
GOTERM_BP_FAT	GO:0006350~transcription	1072	11.8309	6.57605e-55	ENSMUSG00000002658, ENSMUSG00000038518, ENSMUSG00000030543, ENSMUSG00000038797, ENSMUSG00000032777, ENSMUSG00000056476, ENSMUSG00000025616, ENSMUSG00000023781, ENSMUSG00000019777, ENSMUSG00000018501, ENSMUSG00000046179, ENSMUSG00000006058, ENSMUSG00000061517, ENSMUSG00000019564, ENSMUSG00000024369, ENSMUSG00000040033, ENSMUSG00000026058, ENSMUSG00000029687, ENSMUSG00000042448, ENSMUSG00000029684,…	5884	1772	13588	1.39706	3.47741e-51	3.47741e-51	1.25884e-51
GOTERM_BP_FAT	GO:0045449~regulation of transcription	1275	14.0713	1.25642e-47	ENSMUSG00000009248, ENSMUSG00000002658, ENSMUSG00000030543, ENSMUSG00000038518, ENSMUSG00000038797, ENSMUSG00000048756, ENSMUSG00000035187, ENSMUSG00000033276, ENSMUSG00000056476, ENSMUSG00000025616, ENSMUSG00000023781, ENSMUSG00000019777, ENSMUSG00000018501, ENSMUSG00000046179, ENSMUSG00000019564, ENSMUSG00000006058, ENSMUSG00000061517, ENSMUSG00000024369, ENSMUSG00000040033, ENSMUSG00000026058,…	5884	2227	13588	1.32213	6.64395e-44	3.32198e-44	2.40514e-44
GOTERM_BP_FAT	GO:0007049~cell cycle	422	4.65732	3.13644e-39	ENSMUSG00000019773, ENSMUSG00000027510, ENSMUSG00000027654, ENSMUSG00000025616, ENSMUSG00000030641, ENSMUSG00000046179, ENSMUSG00000019370, ENSMUSG00000025480, ENSMUSG00000018509, ENSMUSG00000040034, ENSMUSG00000029586, ENSMUSG00000025487, ENSMUSG00000006398, ENSMUSG00000042303, ENSMUSG00000003068, ENSMUSG00000035198, ENSMUSG00000053398, ENSMUSG00000027641, ENSMUSG00000020900, ENSMUSG00000079562,…	5884	611	13588	1.59498	1.65855e-35	5.52849e-36	6.00401e-36
GOTERM_BP_FAT	GO:0006396~RNA processing	309	3.41022	1.17635e-31	ENSMUSG00000024266, ENSMUSG00000027510, ENSMUSG00000053286, ENSMUSG00000028907, ENSMUSG00000020262, ENSMUSG00000040824, ENSMUSG00000035575, ENSMUSG00000034820, ENSMUSG00000028902, ENSMUSG00000001909, ENSMUSG00000027763, ENSMUSG00000020409, ENSMUSG00000029169, ENSMUSG00000056209, ENSMUSG00000034442, ENSMUSG00000036698, ENSMUSG00000006651, ENSMUSG00000025785, ENSMUSG00000037805, ENSMUSG00000002524,…	5884	437	13588	1.6329	6.22052e-28	1.55513e-28	2.25185e-28
GOTERM_BP_FAT	GO:0008104~protein localization	473	5.22017	1.68668e-28	ENSMUSG00000035284, ENSMUSG00000020128, ENSMUSG00000053799, ENSMUSG00000039367, ENSMUSG00000030643, ENSMUSG00000006058, ENSMUSG00000052707, ENSMUSG00000040034, ENSMUSG00000050192, ENSMUSG00000025484, ENSMUSG00000033475, ENSMUSG00000027519, ENSMUSG00000019971, ENSMUSG00000025786, ENSMUSG00000053291, ENSMUSG00000074030, ENSMUSG00000034813, ENSMUSG00000024359, ENSMUSG00000053293, ENSMUSG00000024357,…	5884	753	13588	1.4506	8.91918e-25	1.78384e-25	3.22878e-25
GOTERM_BP_FAT	GO:0015031~protein transport	417	4.60214	1.12093e-27	ENSMUSG00000020128, ENSMUSG00000053799, ENSMUSG00000039367, ENSMUSG00000030643, ENSMUSG00000006058, ENSMUSG00000040034, ENSMUSG00000050192, ENSMUSG00000025484, ENSMUSG00000033475, ENSMUSG00000027519, ENSMUSG00000019971, ENSMUSG00000025786, ENSMUSG00000053291, ENSMUSG00000074030, ENSMUSG00000024359, ENSMUSG00000053293, ENSMUSG00000024357, ENSMUSG00000019969, ENSMUSG00000051853, ENSMUSG00000033365,…	5884	651	13588	1.47924	5.92749e-24	9.87914e-25	2.14577e-24
GOTERM_BP_FAT	GO:0045184~establishment of protein localization	418	4.61318	4.74834e-27	ENSMUSG00000020128, ENSMUSG00000053799, ENSMUSG00000039367, ENSMUSG00000030643, ENSMUSG00000006058, ENSMUSG00000040034, ENSMUSG00000050192, ENSMUSG00000025484, ENSMUSG00000033475, ENSMUSG00000027519, ENSMUSG00000019971, ENSMUSG00000025786, ENSMUSG00000053291, ENSMUSG00000074030, ENSMUSG00000024359, ENSMUSG00000053293, ENSMUSG00000024357, ENSMUSG00000019969, ENSMUSG00000051853, ENSMUSG00000033365,…	5884	656	13588	1.47148	2.51092e-23	3.58703e-24	9.08964e-24
GOTERM_BP_FAT	GO:0009057~macromolecule catabolic process	411	4.53592	7.34012e-25	ENSMUSG00000066892, ENSMUSG00000019773, ENSMUSG00000034413, ENSMUSG00000025616, ENSMUSG00000032507, ENSMUSG00000025103, ENSMUSG00000028703, ENSMUSG00000026196, ENSMUSG00000020265, ENSMUSG00000019979, ENSMUSG00000025512, ENSMUSG00000006398, ENSMUSG00000029686, ENSMUSG00000020124, ENSMUSG00000029685, ENSMUSG00000052981, ENSMUSG00000006392, ENSMUSG00000022269, ENSMUSG00000020905, ENSMUSG00000041477,…	5884	654	13588	1.45127	3.88146e-21	4.85182e-22	1.4051e-21
GOTERM_BP_FAT	GO:0044265~cellular macromolecule catabolic process	387	4.27105	9.46424e-25	ENSMUSG00000066892, ENSMUSG00000019773, ENSMUSG00000034413, ENSMUSG00000025616, ENSMUSG00000032507, ENSMUSG00000025103, ENSMUSG00000028703, ENSMUSG00000026196, ENSMUSG00000020265, ENSMUSG00000019979, ENSMUSG00000006398, ENSMUSG00000029686, ENSMUSG00000020124, ENSMUSG00000029685, ENSMUSG00000052981, ENSMUSG00000006392, ENSMUSG00000022269, ENSMUSG00000020905, ENSMUSG00000041477, ENSMUSG00000019578,…	5884	609	13588	1.46749	5.00469e-21	5.56077e-22	1.81172e-21
GOTERM_BP_FAT	GO:0022402~cell cycle process	269	2.96877	3.24499e-24	ENSMUSG00000032397, ENSMUSG00000019773, ENSMUSG00000027654, ENSMUSG00000025616, ENSMUSG00000034575, ENSMUSG00000030641, ENSMUSG00000025480, ENSMUSG00000018509, ENSMUSG00000040034, ENSMUSG00000062248, ENSMUSG00000025487, ENSMUSG00000006398, ENSMUSG00000031787, ENSMUSG00000042303, ENSMUSG00000062380, ENSMUSG00000035439, ENSMUSG00000001525, ENSMUSG00000003068, ENSMUSG00000035198, ENSMUSG00000053398,…	5884	393	13588	1.58068	1.71595e-20	1.71595e-21	6.21181e-21
GOTERM_BP_FAT	GO:0030163~protein catabolic process	354	3.90685	6.65219e-23	ENSMUSG00000066892, ENSMUSG00000083325, ENSMUSG00000030254, ENSMUSG00000019773, ENSMUSG00000034413, ENSMUSG00000025616, ENSMUSG00000032507, ENSMUSG00000025103, ENSMUSG00000051234, ENSMUSG00000036432, ENSMUSG00000028703, ENSMUSG00000026196, ENSMUSG00000020265, ENSMUSG00000006398, ENSMUSG00000029686, ENSMUSG00000020124, ENSMUSG00000029685, ENSMUSG00000052981, ENSMUSG00000006392, ENSMUSG00000022269,…	5884	556	13588	1.47032	3.51768e-19	3.19789e-20	1.27341e-19
GOTERM_BP_FAT	GO:0016071~mRNA metabolic process	215	2.37281	7.99855e-23	ENSMUSG00000021127, ENSMUSG00000045817, ENSMUSG00000027510, ENSMUSG00000064030, ENSMUSG00000020262, ENSMUSG00000040824, ENSMUSG00000034820, ENSMUSG00000028902, ENSMUSG00000027763, ENSMUSG00000020409, ENSMUSG00000041477, ENSMUSG00000029169, ENSMUSG00000036698, ENSMUSG00000006651, ENSMUSG00000002524, ENSMUSG00000022774, ENSMUSG00000024604, ENSMUSG00000021500, ENSMUSG00000037275, ENSMUSG00000033760,…	5884	302	13588	1.64405	4.22963e-19	3.52469e-20	1.53114e-19
GOTERM_BP_FAT	GO:0006974~response to DNA damage stimulus	204	2.25141	1.44167e-21	ENSMUSG00000032397, ENSMUSG00000030254, ENSMUSG00000070425, ENSMUSG00000048756, ENSMUSG00000026196, ENSMUSG00000025384, ENSMUSG00000019970, ENSMUSG00000001524, ENSMUSG00000030538, ENSMUSG00000029591, ENSMUSG00000019969, ENSMUSG00000073436, ENSMUSG00000006599, ENSMUSG00000037032, ENSMUSG00000020413, ENSMUSG00000030528, ENSMUSG00000049300, ENSMUSG00000056394, ENSMUSG00000027433, ENSMUSG00000024906,…	5884	287	13588	1.64146	7.62356e-18	5.86428e-19	2.75976e-18
GOTERM_BP_FAT	GO:0033554~cellular response to stress	268	2.95773	4.02453e-21	ENSMUSG00000032397, ENSMUSG00000070425, ENSMUSG00000030254, ENSMUSG00000048756, ENSMUSG00000021109, ENSMUSG00000052707, ENSMUSG00000026196, ENSMUSG00000067847, ENSMUSG00000022788, ENSMUSG00000025384, ENSMUSG00000042699, ENSMUSG00000019970, ENSMUSG00000001524, ENSMUSG00000021116, ENSMUSG00000030538, ENSMUSG00000033629, ENSMUSG00000027244, ENSMUSG00000025889, ENSMUSG00000009772, ENSMUSG00000020250,…	5884	404	13588	1.53192	2.12817e-17	1.52012e-18	7.70407e-18
GOTERM_BP_FAT	GO:0051603~proteolysis involved in cellular protein catabolic process	337	3.71924	6.24913e-21	ENSMUSG00000066892, ENSMUSG00000083325, ENSMUSG00000030254, ENSMUSG00000019773, ENSMUSG00000034413, ENSMUSG00000025616, ENSMUSG00000032507, ENSMUSG00000025103, ENSMUSG00000051234, ENSMUSG00000036432, ENSMUSG00000028703, ENSMUSG00000026196, ENSMUSG00000020265, ENSMUSG00000006398, ENSMUSG00000029686, ENSMUSG00000020124, ENSMUSG00000029685, ENSMUSG00000052981, ENSMUSG00000006392, ENSMUSG00000022269,…	5884	534	13588	1.45738	3.30454e-17	2.20303e-18	1.19626e-17
GOTERM_BP_FAT	GO:0043632~modification-dependent macromolecule catabolic process	323	3.56473	7.87218e-21	ENSMUSG00000066892, ENSMUSG00000083325, ENSMUSG00000030254, ENSMUSG00000019773, ENSMUSG00000034413, ENSMUSG00000025616, ENSMUSG00000032507, ENSMUSG00000025103, ENSMUSG00000051234, ENSMUSG00000036432, ENSMUSG00000028703, ENSMUSG00000026196, ENSMUSG00000020265, ENSMUSG00000006398, ENSMUSG00000029686, ENSMUSG00000020124, ENSMUSG00000029685, ENSMUSG00000052981, ENSMUSG00000006392, ENSMUSG00000022269,…	5884	508	13588	1.46832	4.16281e-17	2.60176e-18	1.50695e-17
GOTERM_BP_FAT	GO:0019941~modification-dependent protein catabolic process	323	3.56473	7.87218e-21	ENSMUSG00000066892, ENSMUSG00000083325, ENSMUSG00000030254, ENSMUSG00000019773, ENSMUSG00000034413, ENSMUSG00000025616, ENSMUSG00000032507, ENSMUSG00000025103, ENSMUSG00000051234, ENSMUSG00000036432, ENSMUSG00000028703, ENSMUSG00000026196, ENSMUSG00000020265, ENSMUSG00000006398, ENSMUSG00000029686, ENSMUSG00000020124, ENSMUSG00000029685, ENSMUSG00000052981, ENSMUSG00000006392, ENSMUSG00000022269,…	5884	508	13588	1.46832	4.16281e-17	2.60176e-18	1.50695e-17
GOTERM_BP_FAT	GO:0044257~cellular protein catabolic process	338	3.73027	1.00833e-20	ENSMUSG00000066892, ENSMUSG00000083325, ENSMUSG00000030254, ENSMUSG00000019773, ENSMUSG00000034413, ENSMUSG00000025616, ENSMUSG00000032507, ENSMUSG00000025103, ENSMUSG00000051234, ENSMUSG00000036432, ENSMUSG00000028703, ENSMUSG00000026196, ENSMUSG00000020265, ENSMUSG00000006398, ENSMUSG00000029686, ENSMUSG00000020124, ENSMUSG00000029685, ENSMUSG00000052981, ENSMUSG00000006392, ENSMUSG00000022269,…	5884	537	13588	1.45353	5.33203e-17	3.13649e-18	1.93022e-17
GOTERM_BP_FAT	GO:0006397~mRNA processing	188	2.07483	1.11828e-20	ENSMUSG00000029817, ENSMUSG00000040767, ENSMUSG00000028382, ENSMUSG00000031311, ENSMUSG00000027510, ENSMUSG00000042389, ENSMUSG00000055760, ENSMUSG00000041777, ENSMUSG00000020262, ENSMUSG00000040824, ENSMUSG00000034931, ENSMUSG00000034820, ENSMUSG00000028902, ENSMUSG00000002455, ENSMUSG00000020781, ENSMUSG00000038611, ENSMUSG00000027763, ENSMUSG00000020409, ENSMUSG00000029169, ENSMUSG00000025580,…	5884	262	13588	1.65706	5.91347e-17	3.28526e-18	2.1407e-17
GOTERM_BP_FAT	GO:0006412~translation	218	2.40592	1.16914e-19	ENSMUSG00000032399, ENSMUSG00000024360, ENSMUSG00000026254, ENSMUSG00000019774, ENSMUSG00000025794, ENSMUSG00000043572, ENSMUSG00000037563, ENSMUSG00000021266, ENSMUSG00000060636, ENSMUSG00000050192, ENSMUSG00000025208, ENSMUSG00000048758, ENSMUSG00000025508, ENSMUSG00000021116, ENSMUSG00000047635, ENSMUSG00000037805, ENSMUSG00000024608, ENSMUSG00000045948, ENSMUSG00000012848, ENSMUSG00000057841,…	5884	319	13588	1.57815	6.18241e-16	3.2539e-17	2.23806e-16
GOTERM_BP_FAT	GO:0043009~chordate embryonic development	272	3.00188	4.78103e-19	ENSMUSG00000009248, ENSMUSG00000030543, ENSMUSG00000029381, ENSMUSG00000021109, ENSMUSG00000023781, ENSMUSG00000026739, ENSMUSG00000000942, ENSMUSG00000027454, ENSMUSG00000027868, ENSMUSG00000023391, ENSMUSG00000042448, ENSMUSG00000066595, ENSMUSG00000019979, ENSMUSG00000000690, ENSMUSG00000020122, ENSMUSG00000025485, ENSMUSG00000027315, ENSMUSG00000027763, ENSMUSG00000048763, ENSMUSG00000035293,…	5884	421	13588	1.492	2.52821e-15	1.2641e-16	9.15221e-16
GOTERM_BP_FAT	GO:0046907~intracellular transport	277	3.05706	6.43506e-19	ENSMUSG00000000131, ENSMUSG00000020128, ENSMUSG00000039367, ENSMUSG00000042590, ENSMUSG00000025792, ENSMUSG00000021262, ENSMUSG00000024772, ENSMUSG00000025786, ENSMUSG00000037573, ENSMUSG00000007458, ENSMUSG00000022774, ENSMUSG00000024359, ENSMUSG00000020900, ENSMUSG00000019969, ENSMUSG00000033365, ENSMUSG00000036955, ENSMUSG00000029198, ENSMUSG00000020149, ENSMUSG00000037032, ENSMUSG00000040463,…	5884	431	13588	1.48418	3.40286e-15	1.62041e-16	1.23185e-15
GOTERM_BP_FAT	GO:0008380~RNA splicing	149	1.64441	1.13447e-18	ENSMUSG00000029817, ENSMUSG00000040767, ENSMUSG00000031311, ENSMUSG00000027510, ENSMUSG00000042389, ENSMUSG00000055760, ENSMUSG00000041777, ENSMUSG00000040824, ENSMUSG00000034931, ENSMUSG00000028902, ENSMUSG00000002455, ENSMUSG00000027763, ENSMUSG00000020409, ENSMUSG00000029169, ENSMUSG00000025580, ENSMUSG00000002524, ENSMUSG00000022774, ENSMUSG00000019432, ENSMUSG00000028639, ENSMUSG00000024604,…	5884	201	13588	1.71188	5.99907e-15	2.72685e-16	2.17169e-15
GOTERM_BP_FAT	GO:0045934~negative regulation of nucleobase, nucleoside, nucleotide and nucleic acid metabolic process	258	2.84737	1.33124e-18	ENSMUSG00000032397, ENSMUSG00000038518, ENSMUSG00000030254, ENSMUSG00000023781, ENSMUSG00000026739, ENSMUSG00000018501, ENSMUSG00000038418, ENSMUSG00000028707, ENSMUSG00000035576, ENSMUSG00000023391, ENSMUSG00000025486, ENSMUSG00000030256, ENSMUSG00000072872, ENSMUSG00000027641, ENSMUSG00000009575, ENSMUSG00000035011, ENSMUSG00000001910, ENSMUSG00000037171, ENSMUSG00000027102, ENSMUSG00000024642,…	5884	397	13588	1.50076	7.03959e-15	3.06069e-16	2.54836e-15
GOTERM_BP_FAT	GO:0010605~negative regulation of macromolecule metabolic process	315	3.47644	2.34334e-18	ENSMUSG00000032397, ENSMUSG00000038518, ENSMUSG00000030254, ENSMUSG00000019773, ENSMUSG00000023781, ENSMUSG00000026739, ENSMUSG00000018501, ENSMUSG00000038418, ENSMUSG00000052707, ENSMUSG00000028707, ENSMUSG00000035576, ENSMUSG00000023391, ENSMUSG00000025486, ENSMUSG00000030256, ENSMUSG00000072872, ENSMUSG00000036698, ENSMUSG00000027641, ENSMUSG00000022774, ENSMUSG00000009575, ENSMUSG00000035011,…	5884	506	13588	1.43762	1.23916e-14	5.16316e-16	4.4858e-15
GOTERM_BP_FAT	GO:0051301~cell division	194	2.14104	2.44153e-18	ENSMUSG00000032397, ENSMUSG00000019773, ENSMUSG00000025616, ENSMUSG00000027654, ENSMUSG00000026739, ENSMUSG00000034575, ENSMUSG00000025480, ENSMUSG00000018509, ENSMUSG00000040034, ENSMUSG00000062248, ENSMUSG00000031787, ENSMUSG00000006398, ENSMUSG00000035439, ENSMUSG00000022772, ENSMUSG00000020900, ENSMUSG00000079562, ENSMUSG00000021276, ENSMUSG00000032782, ENSMUSG00000056201, ENSMUSG00000027306,…	5884	281	13588	1.59433	1.29108e-14	5.16432e-16	4.67376e-15
GOTERM_BP_FAT	GO:0009792~embryonic development ending in birth or egg hatching	272	3.00188	3.08134e-18	ENSMUSG00000009248, ENSMUSG00000030543, ENSMUSG00000029381, ENSMUSG00000021109, ENSMUSG00000023781, ENSMUSG00000026739, ENSMUSG00000000942, ENSMUSG00000027454, ENSMUSG00000027868, ENSMUSG00000023391, ENSMUSG00000042448, ENSMUSG00000066595, ENSMUSG00000019979, ENSMUSG00000000690, ENSMUSG00000020122, ENSMUSG00000025485, ENSMUSG00000027315, ENSMUSG00000027763, ENSMUSG00000048763, ENSMUSG00000035293,…	5884	425	13588	1.47796	1.62941e-14	6.26697e-16	5.89854e-15
GOTERM_BP_FAT	GO:0051172~negative regulation of nitrogen compound metabolic process	259	2.8584	3.69313e-18	ENSMUSG00000032397, ENSMUSG00000038518, ENSMUSG00000030254, ENSMUSG00000023781, ENSMUSG00000026739, ENSMUSG00000018501, ENSMUSG00000038418, ENSMUSG00000028707, ENSMUSG00000035576, ENSMUSG00000023391, ENSMUSG00000025486, ENSMUSG00000030256, ENSMUSG00000072872, ENSMUSG00000027641, ENSMUSG00000009575, ENSMUSG00000035011, ENSMUSG00000001910, ENSMUSG00000037171, ENSMUSG00000027102, ENSMUSG00000024642,…	5884	401	13588	1.49155	1.95292e-14	7.23305e-16	7.06967e-15
GOTERM_BP_FAT	GO:0016568~chromatin modification	168	1.8541	5.01648e-18	ENSMUSG00000028053, ENSMUSG00000022702, ENSMUSG00000005470, ENSMUSG00000025616, ENSMUSG00000038384, ENSMUSG00000026739, ENSMUSG00000019777, ENSMUSG00000018501, ENSMUSG00000031715, ENSMUSG00000018509, ENSMUSG00000035576, ENSMUSG00000029687, ENSMUSG00000031314, ENSMUSG00000025316, ENSMUSG00000054191, ENSMUSG00000027641, ENSMUSG00000020086, ENSMUSG00000020387, ENSMUSG00000029505, ENSMUSG00000036893,…	5884	236	13588	1.64392	2.65272e-14	9.47399e-16	9.60294e-15
GOTERM_BP_FAT	GO:0006259~DNA metabolic process	269	2.96877	6.52842e-18	ENSMUSG00000032397, ENSMUSG00000070425, ENSMUSG00000030254, ENSMUSG00000034575, ENSMUSG00000039176, ENSMUSG00000026196, ENSMUSG00000027454, ENSMUSG00000019979, ENSMUSG00000025209, ENSMUSG00000025384, ENSMUSG00000001524, ENSMUSG00000012483, ENSMUSG00000040044, ENSMUSG00000001911, ENSMUSG00000021276, ENSMUSG00000029591, ENSMUSG00000022779, ENSMUSG00000000934, ENSMUSG00000073436, ENSMUSG00000025395,…	5884	421	13588	1.47555	3.45223e-14	1.19042e-15	1.24972e-14
GOTERM_BP_FAT	GO:0051276~chromosome organization	259	2.8584	1.49493e-17	ENSMUSG00000069272, ENSMUSG00000069274, ENSMUSG00000025616, ENSMUSG00000026739, ENSMUSG00000019777, ENSMUSG00000018501, ENSMUSG00000056895, ENSMUSG00000025480, ENSMUSG00000018509, ENSMUSG00000035576, ENSMUSG00000029687, ENSMUSG00000027641, ENSMUSG00000069268, ENSMUSG00000069266, ENSMUSG00000009575, ENSMUSG00000006456, ENSMUSG00000022394, ENSMUSG00000026646, ENSMUSG00000027304, ENSMUSG00000036940,…	5884	404	13588	1.48048	7.9052e-14	2.63507e-15	2.86172e-14
GOTERM_BP_FAT	GO:0006357~regulation of transcription from RNA polymerase II promoter	369	4.0724	1.81802e-17	ENSMUSG00000003575, ENSMUSG00000038518, ENSMUSG00000000134, ENSMUSG00000030543, ENSMUSG00000001517, ENSMUSG00000048756, ENSMUSG00000035187, ENSMUSG00000026398, ENSMUSG00000021109, ENSMUSG00000056476, ENSMUSG00000023781, ENSMUSG00000026739, ENSMUSG00000018501, ENSMUSG00000038418, ENSMUSG00000006058, ENSMUSG00000028707, ENSMUSG00000023391, ENSMUSG00000030256, ENSMUSG00000006392, ENSMUSG00000072872,…	5884	616	13588	1.38334	9.61368e-14	3.10119e-15	3.48019e-14
GOTERM_BP_FAT	GO:0031327~negative regulation of cellular biosynthetic process	272	3.00188	2.88097e-17	ENSMUSG00000032397, ENSMUSG00000038518, ENSMUSG00000023781, ENSMUSG00000026739, ENSMUSG00000018501, ENSMUSG00000038418, ENSMUSG00000052707, ENSMUSG00000028707, ENSMUSG00000035576, ENSMUSG00000023391, ENSMUSG00000025486, ENSMUSG00000030256, ENSMUSG00000033161, ENSMUSG00000072872, ENSMUSG00000036698, ENSMUSG00000027641, ENSMUSG00000009575, ENSMUSG00000035011, ENSMUSG00000001910, ENSMUSG00000037171,…	5884	430	13588	1.46077	1.52346e-13	4.76081e-15	5.51498e-14
GOTERM_BP_FAT	GO:0009890~negative regulation of biosynthetic process	274	3.02395	3.15336e-17	ENSMUSG00000032397, ENSMUSG00000038518, ENSMUSG00000023781, ENSMUSG00000026739, ENSMUSG00000018501, ENSMUSG00000038418, ENSMUSG00000052707, ENSMUSG00000028707, ENSMUSG00000035576, ENSMUSG00000023391, ENSMUSG00000025486, ENSMUSG00000030256, ENSMUSG00000033161, ENSMUSG00000072872, ENSMUSG00000036698, ENSMUSG00000027641, ENSMUSG00000009575, ENSMUSG00000035011, ENSMUSG00000001910, ENSMUSG00000037171,…	5884	434	13588	1.45795	1.66749e-13	5.05301e-15	6.0364e-14
GOTERM_BP_FAT	GO:0022403~cell cycle phase	217	2.39488	4.32647e-17	ENSMUSG00000032397, ENSMUSG00000019773, ENSMUSG00000027654, ENSMUSG00000025616, ENSMUSG00000034575, ENSMUSG00000025480, ENSMUSG00000018509, ENSMUSG00000040034, ENSMUSG00000062248, ENSMUSG00000025487, ENSMUSG00000006398, ENSMUSG00000031787, ENSMUSG00000062380, ENSMUSG00000035439, ENSMUSG00000001525, ENSMUSG00000035198, ENSMUSG00000026646, ENSMUSG00000027306, ENSMUSG00000026276, ENSMUSG00000019794,…	5884	328	13588	1.52781	2.28784e-13	6.72893e-15	8.28206e-14
GOTERM_BP_FAT	GO:0010558~negative regulation of macromolecule biosynthetic process	265	2.92462	4.99878e-17	ENSMUSG00000032397, ENSMUSG00000038518, ENSMUSG00000023781, ENSMUSG00000026739, ENSMUSG00000018501, ENSMUSG00000038418, ENSMUSG00000052707, ENSMUSG00000028707, ENSMUSG00000035576, ENSMUSG00000023391, ENSMUSG00000025486, ENSMUSG00000030256, ENSMUSG00000072872, ENSMUSG00000036698, ENSMUSG00000027641, ENSMUSG00000009575, ENSMUSG00000035011, ENSMUSG00000001910, ENSMUSG00000037171, ENSMUSG00000027102,…	5884	418	13588	1.46404	2.64335e-13	7.55244e-15	9.56905e-14
GOTERM_BP_FAT	GO:0001701~in utero embryonic development	183	2.01964	7.34295e-17	ENSMUSG00000009248, ENSMUSG00000027381, ENSMUSG00000021109, ENSMUSG00000032446, ENSMUSG00000031714, ENSMUSG00000026739, ENSMUSG00000015053, ENSMUSG00000029020, ENSMUSG00000027454, ENSMUSG00000014773, ENSMUSG00000008976, ENSMUSG00000066595, ENSMUSG00000025921, ENSMUSG00000020122, ENSMUSG00000025485, ENSMUSG00000029231, ENSMUSG00000027315, ENSMUSG00000051510, ENSMUSG00000024151, ENSMUSG00000027763,…	5884	267	13588	1.58279	5.87086e-13	1.63203e-14	2.10942e-13
GOTERM_BP_FAT	GO:0034660~ncRNA metabolic process	146	1.6113	1.04059e-16	ENSMUSG00000022704, ENSMUSG00000074890, ENSMUSG00000053286, ENSMUSG00000043572, ENSMUSG00000042389, ENSMUSG00000028907, ENSMUSG00000026127, ENSMUSG00000021266, ENSMUSG00000029715, ENSMUSG00000035575, ENSMUSG00000037376, ENSMUSG00000035370, ENSMUSG00000020781, ENSMUSG00000001909, ENSMUSG00000021595, ENSMUSG00000035202, ENSMUSG00000003848, ENSMUSG00000056310, ENSMUSG00000060739, ENSMUSG00000034442,…	5884	202	13588	1.66911	5.87086e-13	1.58762e-14	2.10942e-13
GOTERM_BP_FAT	GO:0000279~M phase	191	2.10794	2.84431e-16	ENSMUSG00000032397, ENSMUSG00000019773, ENSMUSG00000025616, ENSMUSG00000027654, ENSMUSG00000034575, ENSMUSG00000025480, ENSMUSG00000018509, ENSMUSG00000040034, ENSMUSG00000062248, ENSMUSG00000025487, ENSMUSG00000031787, ENSMUSG00000006398, ENSMUSG00000062380, ENSMUSG00000035439, ENSMUSG00000001525, ENSMUSG00000035198, ENSMUSG00000026646, ENSMUSG00000027306, ENSMUSG00000026276, ENSMUSG00000019794,…	5884	283	13588	1.55858	1.76126e-12	4.62963e-14	6.32827e-13
GOTERM_BP_FAT	GO:0010629~negative regulation of gene expression	259	2.8584	4.39727e-16	ENSMUSG00000038518, ENSMUSG00000023781, ENSMUSG00000026739, ENSMUSG00000018501, ENSMUSG00000038418, ENSMUSG00000052707, ENSMUSG00000028707, ENSMUSG00000035576, ENSMUSG00000023391, ENSMUSG00000025486, ENSMUSG00000030256, ENSMUSG00000072872, ENSMUSG00000036698, ENSMUSG00000027641, ENSMUSG00000022774, ENSMUSG00000009575, ENSMUSG00000035011, ENSMUSG00000001910, ENSMUSG00000037171, ENSMUSG00000027102,…	5884	410	13588	1.45881	2.34834e-12	6.01741e-14	8.54872e-13
GOTERM_BP_FAT	GO:0006325~chromatin organization	208	2.29555	4.94111e-16	ENSMUSG00000069272, ENSMUSG00000069274, ENSMUSG00000025616, ENSMUSG00000026739, ENSMUSG00000019777, ENSMUSG00000018501, ENSMUSG00000056895, ENSMUSG00000018509, ENSMUSG00000035576, ENSMUSG00000029687, ENSMUSG00000027641, ENSMUSG00000069268, ENSMUSG00000069266, ENSMUSG00000009575, ENSMUSG00000006456, ENSMUSG00000022394, ENSMUSG00000026646, ENSMUSG00000027304, ENSMUSG00000036940, ENSMUSG00000047246,…	5884	315	13588	1.52488	2.34834e-12	5.87308e-14	8.54872e-13
GOTERM_BP_FAT	GO:0006793~phosphorus metabolic process	490	5.40779	5.9508e-16	ENSMUSG00000033278, ENSMUSG00000033276, ENSMUSG00000025204, ENSMUSG00000042724, ENSMUSG00000003072, ENSMUSG00000030647, ENSMUSG00000026393, ENSMUSG00000028909, ENSMUSG00000032501, ENSMUSG00000006057, ENSMUSG00000046947, ENSMUSG00000022956, ENSMUSG00000028708, ENSMUSG00000033379, ENSMUSG00000020122, ENSMUSG00000053693, ENSMUSG00000022263, ENSMUSG00000019970, ENSMUSG00000021115, ENSMUSG00000021116,…	5884	866	13588	1.30666	2.93543e-12	7.16094e-14	1.06581e-12
GOTERM_BP_FAT	GO:0006796~phosphate metabolic process	490	5.40779	5.9508e-16	ENSMUSG00000033278, ENSMUSG00000033276, ENSMUSG00000025204, ENSMUSG00000042724, ENSMUSG00000003072, ENSMUSG00000030647, ENSMUSG00000026393, ENSMUSG00000028909, ENSMUSG00000032501, ENSMUSG00000006057, ENSMUSG00000046947, ENSMUSG00000022956, ENSMUSG00000028708, ENSMUSG00000033379, ENSMUSG00000020122, ENSMUSG00000053693, ENSMUSG00000022263, ENSMUSG00000019970, ENSMUSG00000021115, ENSMUSG00000021116,…	5884	866	13588	1.30666	2.93543e-12	7.16094e-14	1.06581e-12
GOTERM_BP_FAT	GO:0051252~regulation of RNA metabolic process	788	8.69661	2.18293e-15	ENSMUSG00000038518, ENSMUSG00000030543, ENSMUSG00000038797, ENSMUSG00000048756, ENSMUSG00000035187, ENSMUSG00000025616, ENSMUSG00000056476, ENSMUSG00000023781, ENSMUSG00000018501, ENSMUSG00000046179, ENSMUSG00000061517, ENSMUSG00000006058, ENSMUSG00000019564, ENSMUSG00000040033, ENSMUSG00000023391, ENSMUSG00000042448, ENSMUSG00000000690, ENSMUSG00000001016, ENSMUSG00000025486, ENSMUSG00000037169,…	5884	1488	13588	1.22294	1.17417e-11	2.79554e-13	4.25215e-12
GOTERM_BP_FAT	GO:0016481~negative regulation of transcription	236	2.60457	4.3559e-15	ENSMUSG00000038518, ENSMUSG00000023781, ENSMUSG00000026739, ENSMUSG00000018501, ENSMUSG00000038418, ENSMUSG00000028707, ENSMUSG00000035576, ENSMUSG00000023391, ENSMUSG00000025486, ENSMUSG00000030256, ENSMUSG00000072872, ENSMUSG00000027641, ENSMUSG00000009575, ENSMUSG00000035011, ENSMUSG00000001910, ENSMUSG00000037171, ENSMUSG00000027102, ENSMUSG00000024642, ENSMUSG00000037279, ENSMUSG00000020708,…	5884	372	13588	1.46505	2.28964e-11	5.32463e-13	8.29337e-12
GOTERM_BP_FAT	GO:0006281~DNA repair	154	1.69959	7.10579e-15	ENSMUSG00000070425, ENSMUSG00000030254, ENSMUSG00000031311, ENSMUSG00000025060, ENSMUSG00000024824, ENSMUSG00000026196, ENSMUSG00000025384, ENSMUSG00000039748, ENSMUSG00000031446, ENSMUSG00000001707, ENSMUSG00000024151, ENSMUSG00000001524, ENSMUSG00000020380, ENSMUSG00000025077, ENSMUSG00000078773, ENSMUSG00000021635, ENSMUSG00000029591, ENSMUSG00000018449, ENSMUSG00000002835, ENSMUSG00000030051,…	5884	222	13588	1.60196	3.75735e-11	8.53984e-13	1.36002e-11
GOTERM_BP_FAT	GO:0006355~regulation of transcription, DNA-dependent	771	8.50899	2.91841e-14	ENSMUSG00000030543, ENSMUSG00000038518, ENSMUSG00000038797, ENSMUSG00000048756, ENSMUSG00000035187, ENSMUSG00000056476, ENSMUSG00000025616, ENSMUSG00000023781, ENSMUSG00000018501, ENSMUSG00000046179, ENSMUSG00000019564, ENSMUSG00000006058, ENSMUSG00000061517, ENSMUSG00000040033, ENSMUSG00000023391, ENSMUSG00000042448, ENSMUSG00000000690, ENSMUSG00000001016, ENSMUSG00000037169, ENSMUSG00000025486,…	5884	1465	13588	1.21535	1.54404e-10	3.43114e-12	5.58997e-11
GOTERM_BP_FAT	GO:0051253~negative regulation of RNA metabolic process	200	2.20726	5.66671e-14	ENSMUSG00000038518, ENSMUSG00000023781, ENSMUSG00000026739, ENSMUSG00000018501, ENSMUSG00000038418, ENSMUSG00000028707, ENSMUSG00000023391, ENSMUSG00000025486, ENSMUSG00000030256, ENSMUSG00000072872, ENSMUSG00000027641, ENSMUSG00000009575, ENSMUSG00000035011, ENSMUSG00000027102, ENSMUSG00000037171, ENSMUSG00000024642, ENSMUSG00000037279, ENSMUSG00000036940, ENSMUSG00000022255, ENSMUSG00000036036,…	5884	310	13588	1.48988	2.99414e-10	6.50902e-12	1.08391e-10
GOTERM_BP_FAT	GO:0000278~mitotic cell cycle	164	1.80995	7.09009e-14	ENSMUSG00000032397, ENSMUSG00000025925, ENSMUSG00000029430, ENSMUSG00000019773, ENSMUSG00000027654, ENSMUSG00000029516, ENSMUSG00000025616, ENSMUSG00000034575, ENSMUSG00000028059, ENSMUSG00000018509, ENSMUSG00000040034, ENSMUSG00000056919, ENSMUSG00000031787, ENSMUSG00000006398, ENSMUSG00000062380, ENSMUSG00000024056, ENSMUSG00000035439, ENSMUSG00000025077, ENSMUSG00000020687, ENSMUSG00000053819,…	5884	244	13588	1.55216	3.75148e-10	7.98184e-12	1.35802e-10
GOTERM_BP_FAT	GO:0045892~negative regulation of transcription, DNA-dependent	198	2.18519	1.28023e-13	ENSMUSG00000038518, ENSMUSG00000023781, ENSMUSG00000026739, ENSMUSG00000018501, ENSMUSG00000038418, ENSMUSG00000028707, ENSMUSG00000023391, ENSMUSG00000025486, ENSMUSG00000030256, ENSMUSG00000072872, ENSMUSG00000027641, ENSMUSG00000009575, ENSMUSG00000035011, ENSMUSG00000027102, ENSMUSG00000037171, ENSMUSG00000024642, ENSMUSG00000037279, ENSMUSG00000036940, ENSMUSG00000022255, ENSMUSG00000036036,…	5884	308	13588	1.48456	6.7691e-10	1.41023e-11	2.45048e-10
GOTERM_BP_FAT	GO:0016310~phosphorylation	407	4.49178	1.6272e-13	ENSMUSG00000033276, ENSMUSG00000025204, ENSMUSG00000042724, ENSMUSG00000003072, ENSMUSG00000030647, ENSMUSG00000026393, ENSMUSG00000032501, ENSMUSG00000006057, ENSMUSG00000046947, ENSMUSG00000022956, ENSMUSG00000028708, ENSMUSG00000033379, ENSMUSG00000020122, ENSMUSG00000053693, ENSMUSG00000022263, ENSMUSG00000019970, ENSMUSG00000021115, ENSMUSG00000021116, ENSMUSG00000003068, ENSMUSG00000020115,…	5884	718	13588	1.30904	8.60668e-10	1.75646e-11	3.11562e-10
GOTERM_BP_FAT	GO:0000087~M phase of mitotic cell cycle	135	1.4899	2.61117e-13	ENSMUSG00000032397, ENSMUSG00000025925, ENSMUSG00000029430, ENSMUSG00000019773, ENSMUSG00000027654, ENSMUSG00000029516, ENSMUSG00000025616, ENSMUSG00000034575, ENSMUSG00000028059, ENSMUSG00000018509, ENSMUSG00000040034, ENSMUSG00000056919, ENSMUSG00000031787, ENSMUSG00000006398, ENSMUSG00000062380, ENSMUSG00000024056, ENSMUSG00000035439, ENSMUSG00000025077, ENSMUSG00000020687, ENSMUSG00000079553,…	5884	194	13588	1.607	1.38083e-09	2.76166e-11	4.99867e-10
GOTERM_BP_FAT	GO:0051726~regulation of cell cycle	146	1.6113	3.08431e-13	ENSMUSG00000032397, ENSMUSG00000026842, ENSMUSG00000019773, ENSMUSG00000015656, ENSMUSG00000000282, ENSMUSG00000021453, ENSMUSG00000024824, ENSMUSG00000035576, ENSMUSG00000006715, ENSMUSG00000029586, ENSMUSG00000048904, ENSMUSG00000056917, ENSMUSG00000024151, ENSMUSG00000055670, ENSMUSG00000035198, ENSMUSG00000030265, ENSMUSG00000025217, ENSMUSG00000006728, ENSMUSG00000001855, ENSMUSG00000022770,…	5884	214	13588	1.57551	1.63092e-09	3.19789e-11	5.90406e-10
GOTERM_BP_FAT	GO:0000280~nuclear division	132	1.45679	5.96136e-13	ENSMUSG00000032397, ENSMUSG00000025925, ENSMUSG00000029430, ENSMUSG00000019773, ENSMUSG00000027654, ENSMUSG00000029516, ENSMUSG00000025616, ENSMUSG00000034575, ENSMUSG00000028059, ENSMUSG00000018509, ENSMUSG00000040034, ENSMUSG00000056919, ENSMUSG00000031787, ENSMUSG00000006398, ENSMUSG00000062380, ENSMUSG00000024056, ENSMUSG00000035439, ENSMUSG00000025077, ENSMUSG00000020687, ENSMUSG00000079553,…	5884	190	13588	1.60437	3.15265e-09	6.06279e-11	1.14128e-09
GOTERM_BP_FAT	GO:0007067~mitosis	132	1.45679	5.96136e-13	ENSMUSG00000032397, ENSMUSG00000025925, ENSMUSG00000029430, ENSMUSG00000019773, ENSMUSG00000027654, ENSMUSG00000029516, ENSMUSG00000025616, ENSMUSG00000034575, ENSMUSG00000028059, ENSMUSG00000018509, ENSMUSG00000040034, ENSMUSG00000056919, ENSMUSG00000031787, ENSMUSG00000006398, ENSMUSG00000062380, ENSMUSG00000024056, ENSMUSG00000035439, ENSMUSG00000025077, ENSMUSG00000020687, ENSMUSG00000079553,…	5884	190	13588	1.60437	3.15265e-09	6.06279e-11	1.14128e-09
GOTERM_BP_FAT	GO:0048285~organelle fission	135	1.4899	1.57264e-12	ENSMUSG00000032397, ENSMUSG00000030545, ENSMUSG00000025925, ENSMUSG00000029430, ENSMUSG00000019773, ENSMUSG00000027654, ENSMUSG00000029516, ENSMUSG00000025616, ENSMUSG00000034575, ENSMUSG00000028059, ENSMUSG00000018509, ENSMUSG00000040034, ENSMUSG00000056919, ENSMUSG00000031787, ENSMUSG00000006398, ENSMUSG00000062380, ENSMUSG00000024056, ENSMUSG00000035439, ENSMUSG00000025077, ENSMUSG00000020687,…	5884	197	13588	1.58252	8.31607e-09	1.56907e-10	3.01045e-09
GOTERM_BP_FAT	GO:0016569~covalent chromatin modification	76	0.83876	3.02773e-12	ENSMUSG00000020171, ENSMUSG00000028886, ENSMUSG00000025616, ENSMUSG00000035478, ENSMUSG00000000708, ENSMUSG00000027018, ENSMUSG00000019777, ENSMUSG00000026739, ENSMUSG00000024019, ENSMUSG00000028800, ENSMUSG00000018537, ENSMUSG00000024325, ENSMUSG00000031540, ENSMUSG00000060098, ENSMUSG00000044791, ENSMUSG00000029687, ENSMUSG00000031314, ENSMUSG00000021767, ENSMUSG00000030350, ENSMUSG00000032185,…	5884	96	13588	1.82821	1.60104e-08	2.96489e-10	5.79584e-09
GOTERM_BP_FAT	GO:0006399~tRNA metabolic process	86	0.949123	4.47396e-12	ENSMUSG00000060152, ENSMUSG00000007610, ENSMUSG00000022704, ENSMUSG00000074890, ENSMUSG00000053286, ENSMUSG00000043572, ENSMUSG00000042389, ENSMUSG00000028292, ENSMUSG00000032604, ENSMUSG00000027487, ENSMUSG00000021266, ENSMUSG00000032342, ENSMUSG00000029715, ENSMUSG00000031683, ENSMUSG00000051557, ENSMUSG00000068739, ENSMUSG00000023938, ENSMUSG00000037376, ENSMUSG00000069020, ENSMUSG00000035370,…	5884	113	13588	1.75753	2.36584e-08	4.30153e-10	8.56443e-09
GOTERM_BP_FAT	GO:0034470~ncRNA processing	112	1.23607	5.24861e-12	ENSMUSG00000022704, ENSMUSG00000074890, ENSMUSG00000053286, ENSMUSG00000042389, ENSMUSG00000028907, ENSMUSG00000026127, ENSMUSG00000029715, ENSMUSG00000035575, ENSMUSG00000037376, ENSMUSG00000035370, ENSMUSG00000020781, ENSMUSG00000001909, ENSMUSG00000021595, ENSMUSG00000003848, ENSMUSG00000056310, ENSMUSG00000060739, ENSMUSG00000056209, ENSMUSG00000025580, ENSMUSG00000034442, ENSMUSG00000036698,…	5884	158	13588	1.63698	2.77545e-08	4.95616e-10	1.00472e-08
GOTERM_BP_FAT	GO:0016570~histone modification	73	0.805651	7.09311e-12	ENSMUSG00000020171, ENSMUSG00000028886, ENSMUSG00000025616, ENSMUSG00000035478, ENSMUSG00000000708, ENSMUSG00000027018, ENSMUSG00000019777, ENSMUSG00000026739, ENSMUSG00000024019, ENSMUSG00000028800, ENSMUSG00000018537, ENSMUSG00000024325, ENSMUSG00000031540, ENSMUSG00000060098, ENSMUSG00000044791, ENSMUSG00000029687, ENSMUSG00000031314, ENSMUSG00000021767, ENSMUSG00000030350, ENSMUSG00000032185,…	5884	92	13588	1.83239	3.75083e-08	6.58041e-10	1.35782e-08
GOTERM_BP_FAT	GO:0007017~microtubule-based process	140	1.54508	2.33132e-11	ENSMUSG00000036768, ENSMUSG00000019773, ENSMUSG00000018707, ENSMUSG00000032254, ENSMUSG00000019261, ENSMUSG00000027581, ENSMUSG00000031788, ENSMUSG00000062380, ENSMUSG00000035439, ENSMUSG00000024056, ENSMUSG00000020483, ENSMUSG00000001525, ENSMUSG00000027394, ENSMUSG00000033826, ENSMUSG00000020308, ENSMUSG00000035198, ENSMUSG00000022443, ENSMUSG00000051786, ENSMUSG00000032435, ENSMUSG00000047193,…	5884	211	13588	1.53225	1.2328e-07	2.12552e-09	4.4628e-08
GOTERM_BP_FAT	GO:0010608~posttranscriptional regulation of gene expression	105	1.15881	2.3956e-11	ENSMUSG00000033581, ENSMUSG00000021127, ENSMUSG00000029613, ENSMUSG00000045817, ENSMUSG00000026254, ENSMUSG00000064030, ENSMUSG00000045896, ENSMUSG00000028156, ENSMUSG00000028842, ENSMUSG00000052707, ENSMUSG00000028708, ENSMUSG00000050192, ENSMUSG00000034384, ENSMUSG00000037376, ENSMUSG00000028580, ENSMUSG00000029814, ENSMUSG00000025977, ENSMUSG00000021116, ENSMUSG00000025580, ENSMUSG00000036698,…	5884	148	13588	1.63836	1.26679e-07	2.1471e-09	4.58583e-08
GOTERM_BP_FAT	GO:0070727~cellular macromolecule localization	188	2.07483	2.40145e-11	ENSMUSG00000078970, ENSMUSG00000000131, ENSMUSG00000029430, ENSMUSG00000069631, ENSMUSG00000039367, ENSMUSG00000042590, ENSMUSG00000021079, ENSMUSG00000047187, ENSMUSG00000028649, ENSMUSG00000029020, ENSMUSG00000021824, ENSMUSG00000022841, ENSMUSG00000030082, ENSMUSG00000020882, ENSMUSG00000032042, ENSMUSG00000030316, ENSMUSG00000005069, ENSMUSG00000025786, ENSMUSG00000037573, ENSMUSG00000034893,…	5884	301	13588	1.44236	1.26988e-07	2.11647e-09	4.59703e-08
GOTERM_BP_FAT	GO:0034613~cellular protein localization	186	2.05275	5.07677e-11	ENSMUSG00000078970, ENSMUSG00000000131, ENSMUSG00000029430, ENSMUSG00000069631, ENSMUSG00000039367, ENSMUSG00000042590, ENSMUSG00000021079, ENSMUSG00000047187, ENSMUSG00000028649, ENSMUSG00000029020, ENSMUSG00000021824, ENSMUSG00000022841, ENSMUSG00000030082, ENSMUSG00000020882, ENSMUSG00000032042, ENSMUSG00000030316, ENSMUSG00000005069, ENSMUSG00000025786, ENSMUSG00000037573, ENSMUSG00000034893,…	5884	299	13588	1.43656	2.6846e-07	4.40098e-09	9.71835e-08
GOTERM_BP_FAT	GO:0006468~protein amino acid phosphorylation	358	3.951	5.45981e-11	ENSMUSG00000033276, ENSMUSG00000042724, ENSMUSG00000030110, ENSMUSG00000026393, ENSMUSG00000022781, ENSMUSG00000032501, ENSMUSG00000046947, ENSMUSG00000028708, ENSMUSG00000022788, ENSMUSG00000020122, ENSMUSG00000053693, ENSMUSG00000022263, ENSMUSG00000019970, ENSMUSG00000021115, ENSMUSG00000021116, ENSMUSG00000003068, ENSMUSG00000061393, ENSMUSG00000020115, ENSMUSG00000025880, ENSMUSG00000041187,…	5884	640	13588	1.29177	2.88715e-07	4.65669e-09	1.04516e-07
GOTERM_BP_FAT	GO:0006886~intracellular protein transport	173	1.90928	1.06132e-10	ENSMUSG00000000131, ENSMUSG00000029430, ENSMUSG00000069631, ENSMUSG00000039367, ENSMUSG00000042590, ENSMUSG00000021079, ENSMUSG00000047187, ENSMUSG00000028649, ENSMUSG00000029020, ENSMUSG00000021824, ENSMUSG00000022841, ENSMUSG00000030082, ENSMUSG00000020882, ENSMUSG00000032042, ENSMUSG00000030316, ENSMUSG00000005069, ENSMUSG00000025786, ENSMUSG00000037573, ENSMUSG00000034893, ENSMUSG00000007458,…	5884	276	13588	1.4475	5.61228e-07	8.90838e-09	2.03167e-07
GOTERM_BP_FAT	GO:0006605~protein targeting	94	1.03741	4.13508e-10	ENSMUSG00000030882, ENSMUSG00000055334, ENSMUSG00000000131, ENSMUSG00000029430, ENSMUSG00000048277, ENSMUSG00000002603, ENSMUSG00000069631, ENSMUSG00000042590, ENSMUSG00000020849, ENSMUSG00000021079, ENSMUSG00000028649, ENSMUSG00000029020, ENSMUSG00000027828, ENSMUSG00000027099, ENSMUSG00000067150, ENSMUSG00000020882, ENSMUSG00000032042, ENSMUSG00000030316, ENSMUSG00000002496, ENSMUSG00000037339,…	5884	133	13588	1.63215	2.18663e-06	3.41661e-08	7.91569e-07
GOTERM_BP_FAT	GO:0000122~negative regulation of transcription from RNA polymerase II promoter	147	1.62234	6.59734e-10	ENSMUSG00000033837, ENSMUSG00000038518, ENSMUSG00000001988, ENSMUSG00000020472, ENSMUSG00000023781, ENSMUSG00000026739, ENSMUSG00000018501, ENSMUSG00000038418, ENSMUSG00000041777, ENSMUSG00000028707, ENSMUSG00000049577, ENSMUSG00000008976, ENSMUSG00000023391, ENSMUSG00000037373, ENSMUSG00000030256, ENSMUSG00000071757, ENSMUSG00000030067, ENSMUSG00000055053, ENSMUSG00000072872, ENSMUSG00000027641,…	5884	231	13588	1.46956	3.48867e-06	5.36719e-08	1.26291e-06
GOTERM_BP_FAT	GO:0006417~regulation of translation	74	0.816687	1.48603e-09	ENSMUSG00000033581, ENSMUSG00000021127, ENSMUSG00000029613, ENSMUSG00000024423, ENSMUSG00000026254, ENSMUSG00000040385, ENSMUSG00000064030, ENSMUSG00000045896, ENSMUSG00000028842, ENSMUSG00000028156, ENSMUSG00000005610, ENSMUSG00000032293, ENSMUSG00000020743, ENSMUSG00000052707, ENSMUSG00000058301, ENSMUSG00000028708, ENSMUSG00000034384, ENSMUSG00000050192, ENSMUSG00000037376, ENSMUSG00000039782,…	5884	100	13588	1.70889	7.85811e-06	1.19063e-07	2.84468e-06
GOTERM_BP_FAT	GO:0048598~embryonic morphogenesis	212	2.3397	1.69263e-09	ENSMUSG00000010721, ENSMUSG00000029381, ENSMUSG00000026739, ENSMUSG00000030110, ENSMUSG00000038793, ENSMUSG00000027253, ENSMUSG00000000942, ENSMUSG00000002799, ENSMUSG00000027868, ENSMUSG00000023391, ENSMUSG00000066595, ENSMUSG00000019979, ENSMUSG00000000690, ENSMUSG00000027315, ENSMUSG00000027763, ENSMUSG00000019971, ENSMUSG00000048763, ENSMUSG00000039377, ENSMUSG00000061393, ENSMUSG00000051596,…	5884	359	13588	1.36372	8.95058e-06	1.33591e-07	3.24016e-06
GOTERM_BP_FAT	GO:0035295~tube development	163	1.79892	1.92534e-09	ENSMUSG00000078970, ENSMUSG00000033837, ENSMUSG00000029381, ENSMUSG00000027381, ENSMUSG00000046714, ENSMUSG00000021109, ENSMUSG00000030110, ENSMUSG00000026124, ENSMUSG00000022843, ENSMUSG00000050199, ENSMUSG00000020888, ENSMUSG00000031870, ENSMUSG00000023972, ENSMUSG00000017724, ENSMUSG00000019979, ENSMUSG00000025921, ENSMUSG00000037169, ENSMUSG00000029231, ENSMUSG00000017386, ENSMUSG00000030067,…	5884	264	13588	1.42583	1.01812e-05	1.49724e-07	3.68564e-06
GOTERM_BP_FAT	GO:0007242~intracellular signaling cascade	483	5.33054	2.2518e-09	ENSMUSG00000033170, ENSMUSG00000018500, ENSMUSG00000030643, ENSMUSG00000059866, ENSMUSG00000022957, ENSMUSG00000039943, ENSMUSG00000028708, ENSMUSG00000054136, ENSMUSG00000039942, ENSMUSG00000020121, ENSMUSG00000053693, ENSMUSG00000022263, ENSMUSG00000029685, ENSMUSG00000042303, ENSMUSG00000027519, ENSMUSG00000053291, ENSMUSG00000027500, ENSMUSG00000033629, ENSMUSG00000020700, ENSMUSG00000019969,…	5884	915	13588	1.21901	1.19074e-05	1.72573e-07	4.31057e-06
GOTERM_BP_FAT	GO:0035239~tube morphogenesis	113	1.2471	3.33035e-09	ENSMUSG00000029381, ENSMUSG00000027381, ENSMUSG00000046714, ENSMUSG00000021109, ENSMUSG00000026124, ENSMUSG00000030110, ENSMUSG00000050199, ENSMUSG00000020888, ENSMUSG00000031870, ENSMUSG00000023972, ENSMUSG00000019979, ENSMUSG00000017724, ENSMUSG00000025921, ENSMUSG00000037169, ENSMUSG00000031965, ENSMUSG00000038593, ENSMUSG00000025216, ENSMUSG00000025217, ENSMUSG00000015647, ENSMUSG00000030849,…	5884	171	13588	1.52604	1.76107e-05	2.51584e-07	6.37521e-06
GOTERM_BP_FAT	GO:0045941~positive regulation of transcription	268	2.95773	5.87102e-09	ENSMUSG00000003575, ENSMUSG00000002658, ENSMUSG00000034430, ENSMUSG00000000134, ENSMUSG00000030543, ENSMUSG00000001517, ENSMUSG00000048756, ENSMUSG00000026398, ENSMUSG00000021109, ENSMUSG00000025616, ENSMUSG00000038418, ENSMUSG00000033373, ENSMUSG00000023391, ENSMUSG00000017724, ENSMUSG00000026735, ENSMUSG00000001016, ENSMUSG00000020114, ENSMUSG00000013089, ENSMUSG00000001911, ENSMUSG00000006456,…	5884	475	13588	1.30294	3.10455e-05	4.37267e-07	1.12388e-05
GOTERM_BP_FAT	GO:0032774~RNA biosynthetic process	87	0.960159	1.19306e-08	ENSMUSG00000002658, ENSMUSG00000036376, ENSMUSG00000019738, ENSMUSG00000020228, ENSMUSG00000030291, ENSMUSG00000033543, ENSMUSG00000031487, ENSMUSG00000031585, ENSMUSG00000025408, ENSMUSG00000032402, ENSMUSG00000022682, ENSMUSG00000033020, ENSMUSG00000031314, ENSMUSG00000052293, ENSMUSG00000001604, ENSMUSG00000038611, ENSMUSG00000003847, ENSMUSG00000004667, ENSMUSG00000001524, ENSMUSG00000071359,…	5884	126	13588	1.59453	6.30869e-05	8.76235e-07	2.28384e-05
GOTERM_BP_FAT	GO:0006913~nucleocytoplasmic transport	70	0.772542	1.22244e-08	ENSMUSG00000055334, ENSMUSG00000000131, ENSMUSG00000029430, ENSMUSG00000002603, ENSMUSG00000069631, ENSMUSG00000042590, ENSMUSG00000028676, ENSMUSG00000067150, ENSMUSG00000002496, ENSMUSG00000037339, ENSMUSG00000031922, ENSMUSG00000057113, ENSMUSG00000037573, ENSMUSG00000022538, ENSMUSG00000021025, ENSMUSG00000008450, ENSMUSG00000028161, ENSMUSG00000022774, ENSMUSG00000028330, ENSMUSG00000009470,…	5884	96	13588	1.68387	6.46404e-05	8.85514e-07	2.34008e-05
GOTERM_BP_FAT	GO:0022613~ribonucleoprotein complex biogenesis	93	1.02638	1.314e-08	ENSMUSG00000061286, ENSMUSG00000062647, ENSMUSG00000060152, ENSMUSG00000079470, ENSMUSG00000030216, ENSMUSG00000040688, ENSMUSG00000028676, ENSMUSG00000028907, ENSMUSG00000020430, ENSMUSG00000055760, ENSMUSG00000026127, ENSMUSG00000004268, ENSMUSG00000032215, ENSMUSG00000028741, ENSMUSG00000031683, ENSMUSG00000035575, ENSMUSG00000022682, ENSMUSG00000027613, ENSMUSG00000062604, ENSMUSG00000060098,…	5884	137	13588	1.56764	6.94821e-05	9.38979e-07	2.51537e-05
GOTERM_BP_FAT	GO:0016192~vesicle-mediated transport	262	2.89151	1.36947e-08	ENSMUSG00000039361, ENSMUSG00000070425, ENSMUSG00000001018, ENSMUSG00000020128, ENSMUSG00000053799, ENSMUSG00000039367, ENSMUSG00000027253, ENSMUSG00000027255, ENSMUSG00000022957, ENSMUSG00000023393, ENSMUSG00000024772, ENSMUSG00000027257, ENSMUSG00000074030, ENSMUSG00000075415, ENSMUSG00000006651, ENSMUSG00000037902, ENSMUSG00000033769, ENSMUSG00000039959, ENSMUSG00000027646, ENSMUSG00000020900,…	5884	466	13588	1.29837	7.24148e-05	9.65565e-07	2.62154e-05
GOTERM_BP_FAT	GO:0042254~ribosome biogenesis	79	0.871868	1.40893e-08	ENSMUSG00000062647, ENSMUSG00000061286, ENSMUSG00000060152, ENSMUSG00000079470, ENSMUSG00000030216, ENSMUSG00000040688, ENSMUSG00000020430, ENSMUSG00000028907, ENSMUSG00000026127, ENSMUSG00000004268, ENSMUSG00000032215, ENSMUSG00000028741, ENSMUSG00000031683, ENSMUSG00000035575, ENSMUSG00000022682, ENSMUSG00000027613, ENSMUSG00000038335, ENSMUSG00000022601, ENSMUSG00000026019, ENSMUSG00000028010,…	5884	112	13588	1.62889	7.45015e-05	9.80319e-07	2.69708e-05
GOTERM_BP_FAT	GO:0051169~nuclear transport	71	0.783578	1.46719e-08	ENSMUSG00000055334, ENSMUSG00000000131, ENSMUSG00000029430, ENSMUSG00000002603, ENSMUSG00000069631, ENSMUSG00000042590, ENSMUSG00000028676, ENSMUSG00000067150, ENSMUSG00000002496, ENSMUSG00000037339, ENSMUSG00000031922, ENSMUSG00000057113, ENSMUSG00000037573, ENSMUSG00000022538, ENSMUSG00000021025, ENSMUSG00000008450, ENSMUSG00000028161, ENSMUSG00000022774, ENSMUSG00000028330, ENSMUSG00000009470,…	5884	98	13588	1.67307	7.75819e-05	1.0076e-06	2.8086e-05
GOTERM_BP_FAT	GO:0012501~programmed cell death	265	2.92462	1.74625e-08	ENSMUSG00000026637, ENSMUSG00000031781, ENSMUSG00000030641, ENSMUSG00000051234, ENSMUSG00000036432, ENSMUSG00000022781, ENSMUSG00000017721, ENSMUSG00000002797, ENSMUSG00000022500, ENSMUSG00000019979, ENSMUSG00000029686, ENSMUSG00000019970, ENSMUSG00000044813, ENSMUSG00000072872, ENSMUSG00000030538, ENSMUSG00000006651, ENSMUSG00000035293, ENSMUSG00000025507, ENSMUSG00000039164, ENSMUSG00000002524,…	5884	473	13588	1.2938	9.23374e-05	1.18387e-06	3.3428e-05
GOTERM_BP_FAT	GO:0045935~positive regulation of nucleobase, nucleoside, nucleotide and nucleic acid metabolic process	283	3.12328	1.91842e-08	ENSMUSG00000003575, ENSMUSG00000002658, ENSMUSG00000034430, ENSMUSG00000000134, ENSMUSG00000030543, ENSMUSG00000001517, ENSMUSG00000048756, ENSMUSG00000026398, ENSMUSG00000021109, ENSMUSG00000025616, ENSMUSG00000018500, ENSMUSG00000038418, ENSMUSG00000033373, ENSMUSG00000023391, ENSMUSG00000017724, ENSMUSG00000026735, ENSMUSG00000001016, ENSMUSG00000020114, ENSMUSG00000013089, ENSMUSG00000001911,…	5884	510	13588	1.28144	0.000101441	1.28413e-06	3.67239e-05
GOTERM_BP_FAT	GO:0051254~positive regulation of RNA metabolic process	238	2.62664	2.05013e-08	ENSMUSG00000003575, ENSMUSG00000000134, ENSMUSG00000030543, ENSMUSG00000001517, ENSMUSG00000048756, ENSMUSG00000026398, ENSMUSG00000021109, ENSMUSG00000025616, ENSMUSG00000038418, ENSMUSG00000023391, ENSMUSG00000001016, ENSMUSG00000020114, ENSMUSG00000001911, ENSMUSG00000006456, ENSMUSG00000037171, ENSMUSG00000037279, ENSMUSG00000015839, ENSMUSG00000036940, ENSMUSG00000040433, ENSMUSG00000016477,…	5884	419	13588	1.31173	0.000108405	1.35514e-06	3.92452e-05
GOTERM_BP_FAT	GO:0006351~transcription, DNA-dependent	84	0.92705	2.6951e-08	ENSMUSG00000002658, ENSMUSG00000036376, ENSMUSG00000019738, ENSMUSG00000030291, ENSMUSG00000033543, ENSMUSG00000031487, ENSMUSG00000031585, ENSMUSG00000025408, ENSMUSG00000022682, ENSMUSG00000032402, ENSMUSG00000033020, ENSMUSG00000031314, ENSMUSG00000052293, ENSMUSG00000001604, ENSMUSG00000038611, ENSMUSG00000003847, ENSMUSG00000004667, ENSMUSG00000001524, ENSMUSG00000071359, ENSMUSG00000003923,…	5884	122	13588	1.59002	0.000142507	1.75946e-06	5.15916e-05
GOTERM_BP_FAT	GO:0006915~apoptosis	260	2.86944	3.06679e-08	ENSMUSG00000026637, ENSMUSG00000031781, ENSMUSG00000030641, ENSMUSG00000051234, ENSMUSG00000036432, ENSMUSG00000022781, ENSMUSG00000017721, ENSMUSG00000002797, ENSMUSG00000022500, ENSMUSG00000019979, ENSMUSG00000029686, ENSMUSG00000019970, ENSMUSG00000044813, ENSMUSG00000072872, ENSMUSG00000030538, ENSMUSG00000006651, ENSMUSG00000035293, ENSMUSG00000025507, ENSMUSG00000039164, ENSMUSG00000002524,…	5884	465	13588	1.29123	0.000162159	1.9777e-06	5.87069e-05
GOTERM_BP_FAT	GO:0032268~regulation of cellular protein metabolic process	167	1.84306	4.02679e-08	ENSMUSG00000033581, ENSMUSG00000021127, ENSMUSG00000029613, ENSMUSG00000026254, ENSMUSG00000019773, ENSMUSG00000064030, ENSMUSG00000045896, ENSMUSG00000031714, ENSMUSG00000018501, ENSMUSG00000028156, ENSMUSG00000028842, ENSMUSG00000000489, ENSMUSG00000052707, ENSMUSG00000028708, ENSMUSG00000034384, ENSMUSG00000050192, ENSMUSG00000037376, ENSMUSG00000022788, ENSMUSG00000029026, ENSMUSG00000052155,…	5884	280	13588	1.37734	0.000212914	2.5655e-06	7.70839e-05
GOTERM_BP_FAT	GO:0045893~positive regulation of transcription, DNA-dependent	235	2.59353	4.7591e-08	ENSMUSG00000003575, ENSMUSG00000000134, ENSMUSG00000030543, ENSMUSG00000001517, ENSMUSG00000048756, ENSMUSG00000026398, ENSMUSG00000021109, ENSMUSG00000025616, ENSMUSG00000038418, ENSMUSG00000023391, ENSMUSG00000001016, ENSMUSG00000020114, ENSMUSG00000001911, ENSMUSG00000006456, ENSMUSG00000037171, ENSMUSG00000037279, ENSMUSG00000015839, ENSMUSG00000036940, ENSMUSG00000040433, ENSMUSG00000016477,…	5884	416	13588	1.30454	0.00025163	2.99596e-06	9.11024e-05
GOTERM_BP_FAT	GO:0032446~protein modification by small protein conjugation	59	0.651142	5.11941e-08	ENSMUSG00000033933, ENSMUSG00000026988, ENSMUSG00000035247, ENSMUSG00000026739, ENSMUSG00000045210, ENSMUSG00000036432, ENSMUSG00000051234, ENSMUSG00000024019, ENSMUSG00000032216, ENSMUSG00000055239, ENSMUSG00000024325, ENSMUSG00000020265, ENSMUSG00000019927, ENSMUSG00000034343, ENSMUSG00000024294, ENSMUSG00000035293, ENSMUSG00000020738, ENSMUSG00000020114, ENSMUSG00000062203, ENSMUSG00000022771,…	5884	79	13588	1.72468	0.000270678	3.18487e-06	9.79996e-05
GOTERM_BP_FAT	GO:0010628~positive regulation of gene expression	270	2.9798	5.96342e-08	ENSMUSG00000003575, ENSMUSG00000002658, ENSMUSG00000034430, ENSMUSG00000000134, ENSMUSG00000030543, ENSMUSG00000001517, ENSMUSG00000048756, ENSMUSG00000026398, ENSMUSG00000021109, ENSMUSG00000025616, ENSMUSG00000038418, ENSMUSG00000033373, ENSMUSG00000023391, ENSMUSG00000017724, ENSMUSG00000026735, ENSMUSG00000001016, ENSMUSG00000020114, ENSMUSG00000013089, ENSMUSG00000001911, ENSMUSG00000006456,…	5884	488	13588	1.27769	0.000315296	3.6668e-06	0.000114156
GOTERM_BP_FAT	GO:0070647~protein modification by small protein conjugation or removal	73	0.805651	7.41678e-08	ENSMUSG00000033933, ENSMUSG00000026988, ENSMUSG00000035247, ENSMUSG00000025616, ENSMUSG00000026739, ENSMUSG00000045210, ENSMUSG00000036432, ENSMUSG00000051234, ENSMUSG00000024019, ENSMUSG00000031010, ENSMUSG00000054814, ENSMUSG00000032216, ENSMUSG00000055239, ENSMUSG00000024325, ENSMUSG00000020265, ENSMUSG00000019927, ENSMUSG00000031820, ENSMUSG00000034343, ENSMUSG00000024294, ENSMUSG00000035293,…	5884	104	13588	1.62096	0.000392122	4.50803e-06	0.000141978
GOTERM_BP_FAT	GO:0051173~positive regulation of nitrogen compound metabolic process	288	3.17846	7.78012e-08	ENSMUSG00000003575, ENSMUSG00000002658, ENSMUSG00000034430, ENSMUSG00000000134, ENSMUSG00000030543, ENSMUSG00000001517, ENSMUSG00000048756, ENSMUSG00000026398, ENSMUSG00000021109, ENSMUSG00000025616, ENSMUSG00000018500, ENSMUSG00000038418, ENSMUSG00000033373, ENSMUSG00000023391, ENSMUSG00000017724, ENSMUSG00000026735, ENSMUSG00000001016, ENSMUSG00000020114, ENSMUSG00000013089, ENSMUSG00000001911,…	5884	526	13588	1.26441	0.000411328	4.67513e-06	0.000148933
GOTERM_BP_FAT	GO:0033365~protein localization in organelle	69	0.761505	7.84887e-08	ENSMUSG00000078970, ENSMUSG00000030882, ENSMUSG00000055334, ENSMUSG00000000131, ENSMUSG00000029430, ENSMUSG00000002603, ENSMUSG00000042590, ENSMUSG00000021079, ENSMUSG00000028649, ENSMUSG00000029020, ENSMUSG00000027099, ENSMUSG00000032042, ENSMUSG00000030316, ENSMUSG00000002496, ENSMUSG00000037339, ENSMUSG00000031922, ENSMUSG00000037573, ENSMUSG00000021025, ENSMUSG00000008450, ENSMUSG00000020219,…	5884	97	13588	1.64271	0.000414962	4.66345e-06	0.000150249
GOTERM_BP_FAT	GO:0007389~pattern specification process	168	1.8541	8.01029e-08	ENSMUSG00000033837, ENSMUSG00000019428, ENSMUSG00000030543, ENSMUSG00000029381, ENSMUSG00000046714, ENSMUSG00000035187, ENSMUSG00000023781, ENSMUSG00000026739, ENSMUSG00000026124, ENSMUSG00000020888, ENSMUSG00000038793, ENSMUSG00000027253, ENSMUSG00000000942, ENSMUSG00000037868, ENSMUSG00000014773, ENSMUSG00000023391, ENSMUSG00000021264, ENSMUSG00000052155, ENSMUSG00000000690, ENSMUSG00000074622,…	5884	284	13588	1.36607	0.000423494	4.70648e-06	0.000153339
GOTERM_BP_FAT	GO:0006260~DNA replication	99	1.09259	1.01515e-07	ENSMUSG00000032397, ENSMUSG00000020474, ENSMUSG00000025925, ENSMUSG00000034575, ENSMUSG00000039176, ENSMUSG00000000489, ENSMUSG00000027454, ENSMUSG00000028587, ENSMUSG00000037474, ENSMUSG00000025209, ENSMUSG00000055053, ENSMUSG00000012483, ENSMUSG00000040044, ENSMUSG00000001911, ENSMUSG00000021276, ENSMUSG00000018449, ENSMUSG00000022779, ENSMUSG00000070544, ENSMUSG00000000934, ENSMUSG00000002835,…	5884	152	13588	1.50409	0.000536665	5.89898e-06	0.000194327
GOTERM_BP_FAT	GO:0043933~macromolecular complex subunit organization	209	2.30659	1.22229e-07	ENSMUSG00000002658, ENSMUSG00000039361, ENSMUSG00000000131, ENSMUSG00000024360, ENSMUSG00000019774, ENSMUSG00000069272, ENSMUSG00000019773, ENSMUSG00000069274, ENSMUSG00000025616, ENSMUSG00000042590, ENSMUSG00000056895, ENSMUSG00000027253, ENSMUSG00000018509, ENSMUSG00000021262, ENSMUSG00000029684, ENSMUSG00000062380, ENSMUSG00000027763, ENSMUSG00000020409, ENSMUSG00000001525, ENSMUSG00000035198,…	5884	367	13588	1.31511	0.000646136	7.02546e-06	0.000233979
GOTERM_BP_FAT	GO:0006473~protein amino acid acetylation	32	0.353162	1.29601e-07	ENSMUSG00000020171, ENSMUSG00000030330, ENSMUSG00000037032, ENSMUSG00000035478, ENSMUSG00000027018, ENSMUSG00000055024, ENSMUSG00000000708, ENSMUSG00000020918, ENSMUSG00000026739, ENSMUSG00000027671, ENSMUSG00000009640, ENSMUSG00000028863, ENSMUSG00000003868, ENSMUSG00000018537, ENSMUSG00000031540, ENSMUSG00000022521, ENSMUSG00000022698, ENSMUSG00000031314, ENSMUSG00000021767, ENSMUSG00000003778,…	5884	36	13588	2.05272	0.000685095	7.36911e-06	0.000248092
GOTERM_BP_FAT	GO:0042981~regulation of apoptosis	300	3.31089	1.30967e-07	ENSMUSG00000033170, ENSMUSG00000048756, ENSMUSG00000026637, ENSMUSG00000031781, ENSMUSG00000021109, ENSMUSG00000026739, ENSMUSG00000037815, ENSMUSG00000028907, ENSMUSG00000051234, ENSMUSG00000000282, ENSMUSG00000026196, ENSMUSG00000022957, ENSMUSG00000002799, ENSMUSG00000019975, ENSMUSG00000019979, ENSMUSG00000036931, ENSMUSG00000031511, ENSMUSG00000035293, ENSMUSG00000030265, ENSMUSG00000039164,…	5884	553	13588	1.25279	0.000692313	7.36756e-06	0.000250707
GOTERM_BP_FAT	GO:0043067~regulation of programmed cell death	303	3.344	1.56416e-07	ENSMUSG00000033170, ENSMUSG00000048756, ENSMUSG00000026637, ENSMUSG00000031781, ENSMUSG00000021109, ENSMUSG00000026739, ENSMUSG00000037815, ENSMUSG00000028907, ENSMUSG00000051234, ENSMUSG00000000282, ENSMUSG00000026196, ENSMUSG00000022957, ENSMUSG00000002799, ENSMUSG00000019975, ENSMUSG00000019979, ENSMUSG00000036931, ENSMUSG00000031511, ENSMUSG00000035293, ENSMUSG00000030265, ENSMUSG00000039164,…	5884	560	13588	1.2495	0.000826788	8.70659e-06	0.000299424
GOTERM_BP_FAT	GO:0010604~positive regulation of macromolecule metabolic process	338	3.73027	1.66879e-07	ENSMUSG00000003575, ENSMUSG00000002658, ENSMUSG00000034430, ENSMUSG00000000134, ENSMUSG00000030543, ENSMUSG00000001517, ENSMUSG00000048756, ENSMUSG00000026398, ENSMUSG00000021109, ENSMUSG00000025616, ENSMUSG00000064030, ENSMUSG00000018501, ENSMUSG00000038418, ENSMUSG00000033373, ENSMUSG00000050192, ENSMUSG00000023391, ENSMUSG00000017724, ENSMUSG00000026735, ENSMUSG00000001016, ENSMUSG00000042303,…	5884	633	13588	1.23309	0.000882068	9.19222e-06	0.000319453
GOTERM_BP_FAT	GO:0010941~regulation of cell death	304	3.35504	1.91939e-07	ENSMUSG00000033170, ENSMUSG00000048756, ENSMUSG00000026637, ENSMUSG00000031781, ENSMUSG00000021109, ENSMUSG00000026739, ENSMUSG00000037815, ENSMUSG00000028907, ENSMUSG00000051234, ENSMUSG00000000282, ENSMUSG00000026196, ENSMUSG00000022957, ENSMUSG00000002799, ENSMUSG00000019975, ENSMUSG00000019979, ENSMUSG00000036931, ENSMUSG00000031511, ENSMUSG00000035293, ENSMUSG00000030265, ENSMUSG00000039164,…	5884	563	13588	1.24695	0.00101446	1.04636e-05	0.000367425
GOTERM_BP_FAT	GO:0060562~epithelial tube morphogenesis	76	0.83876	1.93537e-07	ENSMUSG00000029381, ENSMUSG00000004264, ENSMUSG00000018293, ENSMUSG00000035247, ENSMUSG00000002603, ENSMUSG00000030110, ENSMUSG00000020173, ENSMUSG00000020888, ENSMUSG00000022995, ENSMUSG00000018604, ENSMUSG00000021359, ENSMUSG00000031870, ENSMUSG00000023972, ENSMUSG00000019979, ENSMUSG00000017724, ENSMUSG00000025921, ENSMUSG00000002496, ENSMUSG00000003534, ENSMUSG00000048402, ENSMUSG00000027002,…	5884	111	13588	1.58115	0.0010229	1.04431e-05	0.000370483
GOTERM_BP_FAT	GO:0051056~regulation of small GTPase mediated signal transduction	138	1.52301	2.03097e-07	ENSMUSG00000031442, ENSMUSG00000029174, ENSMUSG00000027652, ENSMUSG00000028059, ENSMUSG00000039178, ENSMUSG00000009621, ENSMUSG00000027255, ENSMUSG00000022957, ENSMUSG00000022788, ENSMUSG00000051517, ENSMUSG00000040964, ENSMUSG00000056917, ENSMUSG00000027581, ENSMUSG00000022263, ENSMUSG00000035437, ENSMUSG00000042303, ENSMUSG00000029602, ENSMUSG00000031511, ENSMUSG00000031453, ENSMUSG00000028068,…	5884	228	13588	1.39774	0.0010734	1.08482e-05	0.000388784
GOTERM_BP_FAT	GO:0016573~histone acetylation	31	0.342126	2.59479e-07	ENSMUSG00000020171, ENSMUSG00000030330, ENSMUSG00000037032, ENSMUSG00000035478, ENSMUSG00000027018, ENSMUSG00000055024, ENSMUSG00000000708, ENSMUSG00000020918, ENSMUSG00000026739, ENSMUSG00000027671, ENSMUSG00000009640, ENSMUSG00000028863, ENSMUSG00000003868, ENSMUSG00000018537, ENSMUSG00000031540, ENSMUSG00000022521, ENSMUSG00000031314, ENSMUSG00000021767, ENSMUSG00000003778, ENSMUSG00000062270,…	5884	35	13588	2.04539	0.00137118	1.37211e-05	0.000496713
GOTERM_BP_FAT	GO:0021915~neural tube development	60	0.662179	2.61566e-07	ENSMUSG00000019428, ENSMUSG00000029381, ENSMUSG00000018293, ENSMUSG00000035247, ENSMUSG00000000782, ENSMUSG00000026739, ENSMUSG00000020173, ENSMUSG00000020888, ENSMUSG00000022995, ENSMUSG00000021359, ENSMUSG00000023972, ENSMUSG00000019979, ENSMUSG00000002496, ENSMUSG00000048402, ENSMUSG00000028946, ENSMUSG00000027002, ENSMUSG00000026923, ENSMUSG00000022297, ENSMUSG00000058230, ENSMUSG00000038593,…	5884	83	13588	1.66938	0.0013822	1.36945e-05	0.000500708
GOTERM_BP_FAT	GO:0043039~tRNA aminoacylation	38	0.41938	2.74395e-07	ENSMUSG00000026615, ENSMUSG00000024587, ENSMUSG00000037845, ENSMUSG00000026618, ENSMUSG00000043572, ENSMUSG00000028292, ENSMUSG00000032604, ENSMUSG00000021266, ENSMUSG00000001380, ENSMUSG00000019039, ENSMUSG00000026245, ENSMUSG00000031948, ENSMUSG00000068739, ENSMUSG00000023938, ENSMUSG00000022241, ENSMUSG00000070699, ENSMUSG00000035202, ENSMUSG00000020718, ENSMUSG00000030871, ENSMUSG00000030515,…	5884	46	13588	1.90769	0.00144995	1.42254e-05	0.000525267
GOTERM_BP_FAT	GO:0006418~tRNA aminoacylation for protein translation	38	0.41938	2.74395e-07	ENSMUSG00000026615, ENSMUSG00000024587, ENSMUSG00000037845, ENSMUSG00000026618, ENSMUSG00000043572, ENSMUSG00000028292, ENSMUSG00000032604, ENSMUSG00000021266, ENSMUSG00000001380, ENSMUSG00000019039, ENSMUSG00000026245, ENSMUSG00000031948, ENSMUSG00000068739, ENSMUSG00000023938, ENSMUSG00000022241, ENSMUSG00000070699, ENSMUSG00000035202, ENSMUSG00000020718, ENSMUSG00000030871, ENSMUSG00000030515,…	5884	46	13588	1.90769	0.00144995	1.42254e-05	0.000525267
GOTERM_BP_FAT	GO:0043038~amino acid activation	38	0.41938	2.74395e-07	ENSMUSG00000026615, ENSMUSG00000024587, ENSMUSG00000037845, ENSMUSG00000026618, ENSMUSG00000043572, ENSMUSG00000028292, ENSMUSG00000032604, ENSMUSG00000021266, ENSMUSG00000001380, ENSMUSG00000019039, ENSMUSG00000026245, ENSMUSG00000031948, ENSMUSG00000068739, ENSMUSG00000023938, ENSMUSG00000022241, ENSMUSG00000070699, ENSMUSG00000035202, ENSMUSG00000020718, ENSMUSG00000030871, ENSMUSG00000030515,…	5884	46	13588	1.90769	0.00144995	1.42254e-05	0.000525267
GOTERM_BP_FAT	GO:0010557~positive regulation of macromolecule biosynthetic process	287	3.16742	3.10804e-07	ENSMUSG00000003575, ENSMUSG00000002658, ENSMUSG00000034430, ENSMUSG00000000134, ENSMUSG00000030543, ENSMUSG00000001517, ENSMUSG00000048756, ENSMUSG00000026398, ENSMUSG00000021109, ENSMUSG00000025616, ENSMUSG00000064030, ENSMUSG00000038418, ENSMUSG00000033373, ENSMUSG00000050192, ENSMUSG00000023391, ENSMUSG00000017724, ENSMUSG00000026735, ENSMUSG00000001016, ENSMUSG00000020115, ENSMUSG00000020114,…	5884	530	13588	1.25051	0.00164218	1.59565e-05	0.000594962
GOTERM_BP_FAT	GO:0016567~protein ubiquitination	50	0.551815	3.14546e-07	ENSMUSG00000033933, ENSMUSG00000026988, ENSMUSG00000035247, ENSMUSG00000026739, ENSMUSG00000045210, ENSMUSG00000036432, ENSMUSG00000024019, ENSMUSG00000032216, ENSMUSG00000055239, ENSMUSG00000024325, ENSMUSG00000019927, ENSMUSG00000024294, ENSMUSG00000035293, ENSMUSG00000020114, ENSMUSG00000062203, ENSMUSG00000022771, ENSMUSG00000020184, ENSMUSG00000027598, ENSMUSG00000030779, ENSMUSG00000027300,…	5884	66	13588	1.74948	0.00166194	1.59933e-05	0.000602127
GOTERM_BP_FAT	GO:0032318~regulation of Ras GTPase activity	58	0.640106	3.66931e-07	ENSMUSG00000023353, ENSMUSG00000039678, ENSMUSG00000029174, ENSMUSG00000020745, ENSMUSG00000032870, ENSMUSG00000039178, ENSMUSG00000021368, ENSMUSG00000027255, ENSMUSG00000026159, ENSMUSG00000026155, ENSMUSG00000036473, ENSMUSG00000027581, ENSMUSG00000022749, ENSMUSG00000035437, ENSMUSG00000042303, ENSMUSG00000022364, ENSMUSG00000031709, ENSMUSG00000038665, ENSMUSG00000040247, ENSMUSG00000056413,…	5884	80	13588	1.67425	0.00193845	1.84792e-05	0.000702406
GOTERM_BP_FAT	GO:0006457~protein folding	84	0.92705	4.03923e-07	ENSMUSG00000019428, ENSMUSG00000071866, ENSMUSG00000021037, ENSMUSG00000003226, ENSMUSG00000019732, ENSMUSG00000030357, ENSMUSG00000007944, ENSMUSG00000015656, ENSMUSG00000078451, ENSMUSG00000009563, ENSMUSG00000028343, ENSMUSG00000056629, ENSMUSG00000005981, ENSMUSG00000066151, ENSMUSG00000025613, ENSMUSG00000074212, ENSMUSG00000025757, ENSMUSG00000024963, ENSMUSG00000015357, ENSMUSG00000021868,…	5884	127	13588	1.52742	0.00213366	2.01502e-05	0.000773217
GOTERM_BP_FAT	GO:0017038~protein import	59	0.651142	4.34118e-07	ENSMUSG00000030882, ENSMUSG00000055334, ENSMUSG00000000131, ENSMUSG00000029430, ENSMUSG00000002603, ENSMUSG00000042590, ENSMUSG00000021079, ENSMUSG00000029020, ENSMUSG00000027099, ENSMUSG00000030316, ENSMUSG00000002496, ENSMUSG00000037339, ENSMUSG00000031922, ENSMUSG00000037573, ENSMUSG00000021025, ENSMUSG00000008450, ENSMUSG00000020219, ENSMUSG00000028161, ENSMUSG00000009470, ENSMUSG00000001855,…	5884	82	13588	1.66158	0.00229298	2.14541e-05	0.000831018
GOTERM_BP_FAT	GO:0048729~tissue morphogenesis	142	1.56716	4.40715e-07	ENSMUSG00000042821, ENSMUSG00000029381, ENSMUSG00000046714, ENSMUSG00000032446, ENSMUSG00000030110, ENSMUSG00000020888, ENSMUSG00000027198, ENSMUSG00000028649, ENSMUSG00000038415, ENSMUSG00000002799, ENSMUSG00000031870, ENSMUSG00000023972, ENSMUSG00000017724, ENSMUSG00000019979, ENSMUSG00000025921, ENSMUSG00000020122, ENSMUSG00000025199, ENSMUSG00000038593, ENSMUSG00000025217, ENSMUSG00000025880,…	5884	238	13588	1.37783	0.00232779	2.15785e-05	0.000843647
GOTERM_BP_FAT	GO:0006403~RNA localization	50	0.551815	6.78924e-07	ENSMUSG00000003226, ENSMUSG00000039536, ENSMUSG00000028676, ENSMUSG00000032939, ENSMUSG00000040034, ENSMUSG00000050192, ENSMUSG00000057113, ENSMUSG00000034274, ENSMUSG00000025580, ENSMUSG00000020739, ENSMUSG00000022774, ENSMUSG00000028330, ENSMUSG00000019432, ENSMUSG00000001855, ENSMUSG00000053293, ENSMUSG00000075600, ENSMUSG00000036992, ENSMUSG00000024120, ENSMUSG00000040549, ENSMUSG00000017774,…	5884	67	13588	1.72337	0.00358372	3.29366e-05	0.00129964
GOTERM_BP_FAT	GO:0007005~mitochondrion organization	67	0.739433	7.01033e-07	ENSMUSG00000030882, ENSMUSG00000038084, ENSMUSG00000035505, ENSMUSG00000003438, ENSMUSG00000074210, ENSMUSG00000021079, ENSMUSG00000039176, ENSMUSG00000051234, ENSMUSG00000021669, ENSMUSG00000002797, ENSMUSG00000029020, ENSMUSG00000027099, ENSMUSG00000022889, ENSMUSG00000021666, ENSMUSG00000029026, ENSMUSG00000030316, ENSMUSG00000025209, ENSMUSG00000005069, ENSMUSG00000003923, ENSMUSG00000025076,…	5884	97	13588	1.59509	0.0037002	3.37e-05	0.00134196
GOTERM_BP_FAT	GO:0003002~regionalization	129	1.42368	7.1875e-07	ENSMUSG00000033837, ENSMUSG00000019428, ENSMUSG00000030543, ENSMUSG00000046714, ENSMUSG00000035187, ENSMUSG00000023781, ENSMUSG00000026739, ENSMUSG00000026124, ENSMUSG00000020888, ENSMUSG00000038793, ENSMUSG00000027253, ENSMUSG00000037868, ENSMUSG00000000942, ENSMUSG00000014773, ENSMUSG00000023391, ENSMUSG00000021264, ENSMUSG00000052155, ENSMUSG00000000690, ENSMUSG00000074622, ENSMUSG00000031965,…	5884	214	13588	1.39206	0.00379354	3.42404e-05	0.00137588
GOTERM_BP_FAT	GO:0065003~macromolecular complex assembly	191	2.10794	9.15447e-07	ENSMUSG00000002658, ENSMUSG00000039361, ENSMUSG00000000131, ENSMUSG00000069272, ENSMUSG00000019773, ENSMUSG00000069274, ENSMUSG00000025616, ENSMUSG00000042590, ENSMUSG00000056895, ENSMUSG00000027253, ENSMUSG00000018509, ENSMUSG00000029684, ENSMUSG00000062380, ENSMUSG00000027763, ENSMUSG00000020409, ENSMUSG00000001525, ENSMUSG00000035198, ENSMUSG00000069268, ENSMUSG00000069266, ENSMUSG00000024608,…	5884	338	13588	1.30497	0.00482919	4.32213e-05	0.00175241
GOTERM_BP_FAT	GO:0001838~embryonic epithelial tube formation	42	0.463525	1.06952e-06	ENSMUSG00000029381, ENSMUSG00000047407, ENSMUSG00000041703, ENSMUSG00000022623, ENSMUSG00000018293, ENSMUSG00000035247, ENSMUSG00000020918, ENSMUSG00000028266, ENSMUSG00000030110, ENSMUSG00000020173, ENSMUSG00000020888, ENSMUSG00000031523, ENSMUSG00000022995, ENSMUSG00000021359, ENSMUSG00000023972, ENSMUSG00000036602, ENSMUSG00000019979, ENSMUSG00000002496, ENSMUSG00000027002, ENSMUSG00000022297,…	5884	54	13588	1.79613	0.00563968	5.00487e-05	0.00204734
GOTERM_BP_FAT	GO:0001824~blastocyst development	42	0.463525	1.06952e-06	ENSMUSG00000046010, ENSMUSG00000007613, ENSMUSG00000028693, ENSMUSG00000030291, ENSMUSG00000002102, ENSMUSG00000032446, ENSMUSG00000034708, ENSMUSG00000019470, ENSMUSG00000028224, ENSMUSG00000004364, ENSMUSG00000029020, ENSMUSG00000029547, ENSMUSG00000027454, ENSMUSG00000024486, ENSMUSG00000024406, ENSMUSG00000030353, ENSMUSG00000000902, ENSMUSG00000017697, ENSMUSG00000020692, ENSMUSG00000029646,…	5884	54	13588	1.79613	0.00563968	5.00487e-05	0.00204734
GOTERM_BP_FAT	GO:0008219~cell death	273	3.01291	1.15198e-06	ENSMUSG00000026637, ENSMUSG00000031781, ENSMUSG00000030641, ENSMUSG00000051234, ENSMUSG00000036432, ENSMUSG00000022781, ENSMUSG00000017721, ENSMUSG00000002797, ENSMUSG00000038417, ENSMUSG00000022500, ENSMUSG00000019979, ENSMUSG00000029686, ENSMUSG00000019970, ENSMUSG00000044813, ENSMUSG00000072872, ENSMUSG00000030538, ENSMUSG00000006651, ENSMUSG00000035293, ENSMUSG00000025507, ENSMUSG00000002524,…	5884	507	13588	1.24348	0.00607315	5.34342e-05	0.00220518
GOTERM_BP_FAT	GO:0050658~RNA transport	49	0.540779	1.15895e-06	ENSMUSG00000062078, ENSMUSG00000003226, ENSMUSG00000022142, ENSMUSG00000025872, ENSMUSG00000008301, ENSMUSG00000052798, ENSMUSG00000060244, ENSMUSG00000024287, ENSMUSG00000028676, ENSMUSG00000035351, ENSMUSG00000032939, ENSMUSG00000040034, ENSMUSG00000050192, ENSMUSG00000004980, ENSMUSG00000057113, ENSMUSG00000025134, ENSMUSG00000034274, ENSMUSG00000015023, ENSMUSG00000026999, ENSMUSG00000022338,…	5884	66	13588	1.71449	0.00610981	5.32904e-05	0.00221854
GOTERM_BP_FAT	GO:0051236~establishment of RNA localization	49	0.540779	1.15895e-06	ENSMUSG00000062078, ENSMUSG00000003226, ENSMUSG00000022142, ENSMUSG00000025872, ENSMUSG00000008301, ENSMUSG00000052798, ENSMUSG00000060244, ENSMUSG00000024287, ENSMUSG00000028676, ENSMUSG00000035351, ENSMUSG00000032939, ENSMUSG00000040034, ENSMUSG00000050192, ENSMUSG00000004980, ENSMUSG00000057113, ENSMUSG00000025134, ENSMUSG00000034274, ENSMUSG00000015023, ENSMUSG00000026999, ENSMUSG00000022338,…	5884	66	13588	1.71449	0.00610981	5.32904e-05	0.00221854
GOTERM_BP_FAT	GO:0050657~nucleic acid transport	49	0.540779	1.15895e-06	ENSMUSG00000062078, ENSMUSG00000003226, ENSMUSG00000022142, ENSMUSG00000025872, ENSMUSG00000008301, ENSMUSG00000052798, ENSMUSG00000060244, ENSMUSG00000024287, ENSMUSG00000028676, ENSMUSG00000035351, ENSMUSG00000032939, ENSMUSG00000040034, ENSMUSG00000050192, ENSMUSG00000004980, ENSMUSG00000057113, ENSMUSG00000025134, ENSMUSG00000034274, ENSMUSG00000015023, ENSMUSG00000026999, ENSMUSG00000022338,…	5884	66	13588	1.71449	0.00610981	5.32904e-05	0.00221854
GOTERM_BP_FAT	GO:0030030~cell projection organization	181	1.99757	1.26298e-06	ENSMUSG00000075271, ENSMUSG00000075273, ENSMUSG00000033585, ENSMUSG00000029516, ENSMUSG00000030733, ENSMUSG00000026255, ENSMUSG00000029512, ENSMUSG00000000489, ENSMUSG00000025401, ENSMUSG00000032259, ENSMUSG00000019261, ENSMUSG00000037868, ENSMUSG00000023022, ENSMUSG00000009621, ENSMUSG00000021823, ENSMUSG00000027967, ENSMUSG00000051650, ENSMUSG00000021262, ENSMUSG00000022788, ENSMUSG00000017724,…	5884	319	13588	1.3103	0.00665639	5.75728e-05	0.00241766
GOTERM_BP_FAT	GO:0034504~protein localization in nucleus	46	0.50767	1.29528e-06	ENSMUSG00000078970, ENSMUSG00000055334, ENSMUSG00000000131, ENSMUSG00000029430, ENSMUSG00000001440, ENSMUSG00000002603, ENSMUSG00000055116, ENSMUSG00000042590, ENSMUSG00000036986, ENSMUSG00000033953, ENSMUSG00000026751, ENSMUSG00000030662, ENSMUSG00000032812, ENSMUSG00000018362, ENSMUSG00000020315, ENSMUSG00000059552, ENSMUSG00000038805, ENSMUSG00000002496, ENSMUSG00000037339, ENSMUSG00000031922,…	5884	61	13588	1.74145	0.00682603	5.85405e-05	0.00247949
GOTERM_BP_FAT	GO:0001841~neural tube formation	40	0.441452	1.43322e-06	ENSMUSG00000029381, ENSMUSG00000047407, ENSMUSG00000041703, ENSMUSG00000018293, ENSMUSG00000035247, ENSMUSG00000020918, ENSMUSG00000028266, ENSMUSG00000020173, ENSMUSG00000020888, ENSMUSG00000031523, ENSMUSG00000022995, ENSMUSG00000021359, ENSMUSG00000023972, ENSMUSG00000036602, ENSMUSG00000019979, ENSMUSG00000002496, ENSMUSG00000027002, ENSMUSG00000022297, ENSMUSG00000058230, ENSMUSG00000024294,…	5884	51	13588	1.81123	0.00755024	6.42258e-05	0.00274355
GOTERM_BP_FAT	GO:0046578~regulation of Ras protein signal transduction	111	1.22503	1.45156e-06	ENSMUSG00000031442, ENSMUSG00000029174, ENSMUSG00000028059, ENSMUSG00000039178, ENSMUSG00000009621, ENSMUSG00000027255, ENSMUSG00000022957, ENSMUSG00000022788, ENSMUSG00000051517, ENSMUSG00000040964, ENSMUSG00000027581, ENSMUSG00000022263, ENSMUSG00000035437, ENSMUSG00000042303, ENSMUSG00000031709, ENSMUSG00000031511, ENSMUSG00000017631, ENSMUSG00000030265, ENSMUSG00000040247, ENSMUSG00000056413,…	5884	181	13588	1.41621	0.00764645	6.45008e-05	0.00277865
GOTERM_BP_FAT	GO:0031328~positive regulation of cellular biosynthetic process	294	3.24467	1.51406e-06	ENSMUSG00000003575, ENSMUSG00000002658, ENSMUSG00000034430, ENSMUSG00000000134, ENSMUSG00000030543, ENSMUSG00000001517, ENSMUSG00000048756, ENSMUSG00000026398, ENSMUSG00000021109, ENSMUSG00000025616, ENSMUSG00000064030, ENSMUSG00000018500, ENSMUSG00000038418, ENSMUSG00000033373, ENSMUSG00000050192, ENSMUSG00000023391, ENSMUSG00000017724, ENSMUSG00000026735, ENSMUSG00000001016, ENSMUSG00000020115,…	5884	552	13588	1.22996	0.00797439	6.67174e-05	0.00289829
GOTERM_BP_FAT	GO:0016265~death	278	3.06809	1.6222e-06	ENSMUSG00000026637, ENSMUSG00000031781, ENSMUSG00000030641, ENSMUSG00000051234, ENSMUSG00000036432, ENSMUSG00000022781, ENSMUSG00000017721, ENSMUSG00000002797, ENSMUSG00000038417, ENSMUSG00000022500, ENSMUSG00000019979, ENSMUSG00000029686, ENSMUSG00000019970, ENSMUSG00000044813, ENSMUSG00000072872, ENSMUSG00000030538, ENSMUSG00000006651, ENSMUSG00000035293, ENSMUSG00000025507, ENSMUSG00000002524,…	5884	519	13588	1.23697	0.0085415	7.08916e-05	0.00310529
GOTERM_BP_FAT	GO:0009891~positive regulation of biosynthetic process	296	3.26675	1.7879e-06	ENSMUSG00000003575, ENSMUSG00000002658, ENSMUSG00000034430, ENSMUSG00000000134, ENSMUSG00000030543, ENSMUSG00000001517, ENSMUSG00000048756, ENSMUSG00000026398, ENSMUSG00000021109, ENSMUSG00000025616, ENSMUSG00000064030, ENSMUSG00000018500, ENSMUSG00000038418, ENSMUSG00000033373, ENSMUSG00000050192, ENSMUSG00000023391, ENSMUSG00000017724, ENSMUSG00000026735, ENSMUSG00000001016, ENSMUSG00000020115,…	5884	557	13588	1.22721	0.00940988	7.74924e-05	0.00342248
GOTERM_BP_FAT	GO:0007018~microtubule-based movement	68	0.750469	2.36435e-06	ENSMUSG00000032489, ENSMUSG00000036768, ENSMUSG00000024862, ENSMUSG00000051378, ENSMUSG00000020745, ENSMUSG00000028678, ENSMUSG00000018707, ENSMUSG00000032254, ENSMUSG00000074657, ENSMUSG00000056752, ENSMUSG00000029757, ENSMUSG00000031788, ENSMUSG00000062380, ENSMUSG00000043091, ENSMUSG00000001525, ENSMUSG00000033826, ENSMUSG00000030677, ENSMUSG00000006930, ENSMUSG00000012443, ENSMUSG00000040714,…	5884	101	13588	1.55479	0.0124249	0.000101643	0.00452592
GOTERM_BP_FAT	GO:0045944~positive regulation of transcription from RNA polymerase II promoter	199	2.19623	2.44871e-06	ENSMUSG00000003575, ENSMUSG00000030543, ENSMUSG00000000134, ENSMUSG00000001517, ENSMUSG00000048756, ENSMUSG00000021109, ENSMUSG00000026398, ENSMUSG00000038418, ENSMUSG00000023391, ENSMUSG00000020114, ENSMUSG00000001911, ENSMUSG00000006456, ENSMUSG00000037171, ENSMUSG00000036940, ENSMUSG00000040433, ENSMUSG00000026641, ENSMUSG00000043962, ENSMUSG00000037032, ENSMUSG00000037034, ENSMUSG00000055116,…	5884	358	13588	1.28367	0.0128653	0.00010442	0.0046874
GOTERM_BP_FAT	GO:0007010~cytoskeleton organization	183	2.01964	2.80315e-06	ENSMUSG00000029381, ENSMUSG00000026842, ENSMUSG00000020476, ENSMUSG00000019773, ENSMUSG00000020128, ENSMUSG00000028906, ENSMUSG00000034574, ENSMUSG00000000489, ENSMUSG00000028059, ENSMUSG00000014778, ENSMUSG00000019261, ENSMUSG00000023022, ENSMUSG00000021262, ENSMUSG00000041112, ENSMUSG00000029684, ENSMUSG00000027581, ENSMUSG00000053693, ENSMUSG00000018387, ENSMUSG00000024056, ENSMUSG00000035439,…	5884	326	13588	1.29633	0.0147138	0.000118578	0.00536588
GOTERM_BP_FAT	GO:0007050~cell cycle arrest	43	0.474561	3.08346e-06	ENSMUSG00000044303, ENSMUSG00000003031, ENSMUSG00000037032, ENSMUSG00000022369, ENSMUSG00000030641, ENSMUSG00000010067, ENSMUSG00000036986, ENSMUSG00000075334, ENSMUSG00000036390, ENSMUSG00000024947, ENSMUSG00000028649, ENSMUSG00000029020, ENSMUSG00000029004, ENSMUSG00000025408, ENSMUSG00000034201, ENSMUSG00000032855, ENSMUSG00000005871, ENSMUSG00000029026, ENSMUSG00000038332, ENSMUSG00000023067,…	5884	57	13588	1.74211	0.0161732	0.000129399	0.00590244
GOTERM_BP_FAT	GO:0043065~positive regulation of apoptosis	144	1.58923	3.12211e-06	ENSMUSG00000027381, ENSMUSG00000027387, ENSMUSG00000048756, ENSMUSG00000029433, ENSMUSG00000020074, ENSMUSG00000028907, ENSMUSG00000051234, ENSMUSG00000024824, ENSMUSG00000026196, ENSMUSG00000019975, ENSMUSG00000025408, ENSMUSG00000028443, ENSMUSG00000019979, ENSMUSG00000036931, ENSMUSG00000001707, ENSMUSG00000024959, ENSMUSG00000031511, ENSMUSG00000028974, ENSMUSG00000025076, ENSMUSG00000039164,…	5884	248	13588	1.34089	0.0163742	0.00012999	0.00597642
GOTERM_BP_FAT	GO:0043068~positive regulation of programmed cell death	145	1.60026	3.13097e-06	ENSMUSG00000027381, ENSMUSG00000027387, ENSMUSG00000048756, ENSMUSG00000029433, ENSMUSG00000020074, ENSMUSG00000028907, ENSMUSG00000051234, ENSMUSG00000024824, ENSMUSG00000026196, ENSMUSG00000019975, ENSMUSG00000025408, ENSMUSG00000028443, ENSMUSG00000019979, ENSMUSG00000036931, ENSMUSG00000001707, ENSMUSG00000024959, ENSMUSG00000031511, ENSMUSG00000028974, ENSMUSG00000025076, ENSMUSG00000039164,…	5884	250	13588	1.3394	0.0164203	0.00012934	0.00599338
GOTERM_BP_FAT	GO:0016331~morphogenesis of embryonic epithelium	55	0.606997	3.13555e-06	ENSMUSG00000029381, ENSMUSG00000018293, ENSMUSG00000035247, ENSMUSG00000030110, ENSMUSG00000020173, ENSMUSG00000020888, ENSMUSG00000022995, ENSMUSG00000002799, ENSMUSG00000021359, ENSMUSG00000023972, ENSMUSG00000019979, ENSMUSG00000025921, ENSMUSG00000002496, ENSMUSG00000048402, ENSMUSG00000048616, ENSMUSG00000027002, ENSMUSG00000022297, ENSMUSG00000058230, ENSMUSG00000038593, ENSMUSG00000024294,…	5884	78	13588	1.62836	0.0164441	0.000128525	0.00600214
GOTERM_BP_FAT	GO:0010942~positive regulation of cell death	146	1.6113	3.13867e-06	ENSMUSG00000027381, ENSMUSG00000027387, ENSMUSG00000048756, ENSMUSG00000029433, ENSMUSG00000020074, ENSMUSG00000028907, ENSMUSG00000051234, ENSMUSG00000024824, ENSMUSG00000026196, ENSMUSG00000019975, ENSMUSG00000025408, ENSMUSG00000028443, ENSMUSG00000019979, ENSMUSG00000036931, ENSMUSG00000001707, ENSMUSG00000024959, ENSMUSG00000031511, ENSMUSG00000028974, ENSMUSG00000025076, ENSMUSG00000039164,…	5884	252	13588	1.33794	0.0164603	0.000127663	0.0060081
GOTERM_BP_FAT	GO:0014020~primary neural tube formation	34	0.375235	3.27339e-06	ENSMUSG00000029381, ENSMUSG00000047407, ENSMUSG00000041703, ENSMUSG00000018293, ENSMUSG00000035247, ENSMUSG00000020918, ENSMUSG00000028266, ENSMUSG00000020173, ENSMUSG00000020888, ENSMUSG00000031523, ENSMUSG00000022995, ENSMUSG00000021359, ENSMUSG00000023972, ENSMUSG00000036602, ENSMUSG00000019979, ENSMUSG00000002496, ENSMUSG00000027002, ENSMUSG00000022297, ENSMUSG00000058230, ENSMUSG00000030790,…	5884	42	13588	1.86944	0.0171608	0.000132127	0.006266
GOTERM_BP_FAT	GO:0006511~ubiquitin-dependent protein catabolic process	89	0.982232	3.42731e-06	ENSMUSG00000039703, ENSMUSG00000039701, ENSMUSG00000018189, ENSMUSG00000066892, ENSMUSG00000025616, ENSMUSG00000023977, ENSMUSG00000036432, ENSMUSG00000004364, ENSMUSG00000031010, ENSMUSG00000009293, ENSMUSG00000054814, ENSMUSG00000005682, ENSMUSG00000041264, ENSMUSG00000019927, ENSMUSG00000029686, ENSMUSG00000020124, ENSMUSG00000022365, ENSMUSG00000032301, ENSMUSG00000031826, ENSMUSG00000031446,…	5884	141	13588	1.45765	0.0179604	0.000137291	0.00656061
GOTERM_BP_FAT	GO:0000226~microtubule cytoskeleton organization	73	0.805651	3.5264e-06	ENSMUSG00000040860, ENSMUSG00000019773, ENSMUSG00000020745, ENSMUSG00000037234, ENSMUSG00000017146, ENSMUSG00000056752, ENSMUSG00000019261, ENSMUSG00000005233, ENSMUSG00000000416, ENSMUSG00000027581, ENSMUSG00000022607, ENSMUSG00000048799, ENSMUSG00000035439, ENSMUSG00000032498, ENSMUSG00000024056, ENSMUSG00000057113, ENSMUSG00000001525, ENSMUSG00000027394, ENSMUSG00000020308, ENSMUSG00000022443,…	5884	111	13588	1.51874	0.0184749	0.000140198	0.0067503
GOTERM_BP_FAT	GO:0035148~tube lumen formation	44	0.485598	3.8188e-06	ENSMUSG00000029381, ENSMUSG00000047407, ENSMUSG00000027381, ENSMUSG00000041703, ENSMUSG00000022623, ENSMUSG00000018293, ENSMUSG00000035247, ENSMUSG00000020918, ENSMUSG00000028266, ENSMUSG00000030110, ENSMUSG00000020173, ENSMUSG00000020888, ENSMUSG00000031523, ENSMUSG00000022995, ENSMUSG00000021359, ENSMUSG00000023972, ENSMUSG00000036602, ENSMUSG00000019979, ENSMUSG00000002496, ENSMUSG00000027002,…	5884	59	13588	1.7222	0.0199913	0.000150689	0.00731
GOTERM_BP_FAT	GO:0006461~protein complex assembly	133	1.46783	4.05193e-06	ENSMUSG00000002658, ENSMUSG00000038240, ENSMUSG00000039361, ENSMUSG00000001323, ENSMUSG00000000131, ENSMUSG00000019773, ENSMUSG00000025616, ENSMUSG00000074210, ENSMUSG00000042590, ENSMUSG00000031585, ENSMUSG00000027253, ENSMUSG00000029684, ENSMUSG00000031314, ENSMUSG00000062380, ENSMUSG00000001525, ENSMUSG00000071359, ENSMUSG00000035198, ENSMUSG00000024456, ENSMUSG00000039959, ENSMUSG00000038371,…	5884	227	13588	1.35303	0.0211987	0.000158703	0.00775624
GOTERM_BP_FAT	GO:0070271~protein complex biogenesis	133	1.46783	4.05193e-06	ENSMUSG00000002658, ENSMUSG00000038240, ENSMUSG00000039361, ENSMUSG00000001323, ENSMUSG00000000131, ENSMUSG00000019773, ENSMUSG00000025616, ENSMUSG00000074210, ENSMUSG00000042590, ENSMUSG00000031585, ENSMUSG00000027253, ENSMUSG00000029684, ENSMUSG00000031314, ENSMUSG00000062380, ENSMUSG00000001525, ENSMUSG00000071359, ENSMUSG00000035198, ENSMUSG00000024456, ENSMUSG00000039959, ENSMUSG00000038371,…	5884	227	13588	1.35303	0.0211987	0.000158703	0.00775624
GOTERM_BP_FAT	GO:0051640~organelle localization	41	0.452489	4.25072e-06	ENSMUSG00000022568, ENSMUSG00000034593, ENSMUSG00000021248, ENSMUSG00000025733, ENSMUSG00000025401, ENSMUSG00000005907, ENSMUSG00000041794, ENSMUSG00000033952, ENSMUSG00000024948, ENSMUSG00000041241, ENSMUSG00000027787, ENSMUSG00000029020, ENSMUSG00000019647, ENSMUSG00000020283, ENSMUSG00000063887, ENSMUSG00000037313, ENSMUSG00000024791, ENSMUSG00000024986, ENSMUSG00000022607, ENSMUSG00000048799,…	5884	54	13588	1.75337	0.0222271	0.000165265	0.00813675
GOTERM_BP_FAT	GO:0043087~regulation of GTPase activity	63	0.695287	4.35417e-06	ENSMUSG00000023353, ENSMUSG00000039678, ENSMUSG00000029174, ENSMUSG00000020745, ENSMUSG00000032870, ENSMUSG00000039178, ENSMUSG00000021368, ENSMUSG00000027255, ENSMUSG00000026159, ENSMUSG00000026155, ENSMUSG00000036473, ENSMUSG00000021218, ENSMUSG00000027581, ENSMUSG00000022749, ENSMUSG00000002496, ENSMUSG00000035437, ENSMUSG00000042303, ENSMUSG00000022364, ENSMUSG00000031709, ENSMUSG00000038665,…	5884	93	13588	1.56437	0.0227618	0.000168051	0.00833475
GOTERM_BP_FAT	GO:0016072~rRNA metabolic process	53	0.584924	4.44435e-06	ENSMUSG00000061286, ENSMUSG00000060152, ENSMUSG00000079470, ENSMUSG00000030216, ENSMUSG00000040688, ENSMUSG00000020430, ENSMUSG00000028907, ENSMUSG00000026127, ENSMUSG00000004268, ENSMUSG00000035575, ENSMUSG00000031683, ENSMUSG00000026019, ENSMUSG00000028010, ENSMUSG00000003848, ENSMUSG00000060739, ENSMUSG00000025580, ENSMUSG00000038279, ENSMUSG00000056209, ENSMUSG00000025785, ENSMUSG00000033166,…	5884	75	13588	1.63191	0.0232277	0.000170288	0.00850737
GOTERM_BP_FAT	GO:0008033~tRNA processing	50	0.551815	5.45866e-06	ENSMUSG00000060152, ENSMUSG00000007610, ENSMUSG00000022704, ENSMUSG00000074890, ENSMUSG00000053286, ENSMUSG00000042389, ENSMUSG00000027487, ENSMUSG00000032342, ENSMUSG00000029715, ENSMUSG00000031683, ENSMUSG00000051557, ENSMUSG00000037376, ENSMUSG00000035370, ENSMUSG00000069020, ENSMUSG00000020781, ENSMUSG00000001909, ENSMUSG00000021595, ENSMUSG00000056310, ENSMUSG00000021023, ENSMUSG00000034442,…	5884	70	13588	1.64951	0.0284528	0.000207644	0.0104489
GOTERM_BP_FAT	GO:0006364~rRNA processing	52	0.573888	7.20315e-06	ENSMUSG00000061286, ENSMUSG00000060152, ENSMUSG00000079470, ENSMUSG00000030216, ENSMUSG00000040688, ENSMUSG00000020430, ENSMUSG00000028907, ENSMUSG00000026127, ENSMUSG00000004268, ENSMUSG00000035575, ENSMUSG00000031683, ENSMUSG00000026019, ENSMUSG00000028010, ENSMUSG00000003848, ENSMUSG00000060739, ENSMUSG00000025580, ENSMUSG00000038279, ENSMUSG00000056209, ENSMUSG00000025785, ENSMUSG00000033166,…	5884	74	13588	1.62276	0.0373741	0.000272037	0.0137879
GOTERM_BP_FAT	GO:0034621~cellular macromolecular complex subunit organization	141	1.55612	7.62853e-06	ENSMUSG00000039361, ENSMUSG00000000131, ENSMUSG00000024360, ENSMUSG00000018858, ENSMUSG00000019774, ENSMUSG00000069272, ENSMUSG00000019773, ENSMUSG00000069274, ENSMUSG00000005470, ENSMUSG00000060743, ENSMUSG00000074210, ENSMUSG00000042590, ENSMUSG00000056895, ENSMUSG00000055760, ENSMUSG00000027253, ENSMUSG00000018509, ENSMUSG00000021262, ENSMUSG00000029684, ENSMUSG00000062380, ENSMUSG00000027763,…	5884	245	13588	1.32903	0.039537	0.000286057	0.0146021
GOTERM_BP_FAT	GO:0043543~protein amino acid acylation	37	0.408343	7.99001e-06	ENSMUSG00000020171, ENSMUSG00000030330, ENSMUSG00000037032, ENSMUSG00000035478, ENSMUSG00000020918, ENSMUSG00000020936, ENSMUSG00000027018, ENSMUSG00000055024, ENSMUSG00000000708, ENSMUSG00000026739, ENSMUSG00000027671, ENSMUSG00000009640, ENSMUSG00000028863, ENSMUSG00000031823, ENSMUSG00000003868, ENSMUSG00000018537, ENSMUSG00000031540, ENSMUSG00000022521, ENSMUSG00000022698, ENSMUSG00000031314,…	5884	48	13588	1.7801	0.0413712	0.0002975	0.015294
GOTERM_BP_FAT	GO:0045859~regulation of protein kinase activity	111	1.22503	8.80911e-06	ENSMUSG00000033170, ENSMUSG00000069631, ENSMUSG00000031714, ENSMUSG00000032501, ENSMUSG00000021453, ENSMUSG00000022788, ENSMUSG00000029026, ENSMUSG00000029586, ENSMUSG00000027582, ENSMUSG00000000276, ENSMUSG00000061393, ENSMUSG00000028062, ENSMUSG00000061878, ENSMUSG00000042626, ENSMUSG00000022114, ENSMUSG00000022770, ENSMUSG00000057342, ENSMUSG00000020601, ENSMUSG00000019966, ENSMUSG00000031861,…	5884	186	13588	1.37814	0.0455145	0.000325701	0.0168617
GOTERM_BP_FAT	GO:0051028~mRNA transport	45	0.496634	9.31204e-06	ENSMUSG00000062078, ENSMUSG00000003226, ENSMUSG00000022142, ENSMUSG00000025872, ENSMUSG00000052798, ENSMUSG00000024287, ENSMUSG00000060244, ENSMUSG00000028676, ENSMUSG00000035351, ENSMUSG00000032939, ENSMUSG00000040034, ENSMUSG00000050192, ENSMUSG00000025134, ENSMUSG00000034274, ENSMUSG00000015023, ENSMUSG00000026999, ENSMUSG00000022338, ENSMUSG00000025580, ENSMUSG00000016619, ENSMUSG00000020739,…	5884	62	13588	1.67611	0.0480495	0.000341902	0.0178243
GOTERM_BP_FAT	GO:0042770~DNA damage response, signal transduction	42	0.463525	1.09972e-05	ENSMUSG00000032397, ENSMUSG00000005370, ENSMUSG00000032113, ENSMUSG00000030717, ENSMUSG00000030330, ENSMUSG00000070348, ENSMUSG00000052139, ENSMUSG00000008730, ENSMUSG00000024926, ENSMUSG00000019942, ENSMUSG00000041133, ENSMUSG00000020413, ENSMUSG00000033307, ENSMUSG00000028224, ENSMUSG00000036986, ENSMUSG00000017146, ENSMUSG00000043733, ENSMUSG00000024824, ENSMUSG00000053175, ENSMUSG00000031820,…	5884	57	13588	1.7016	0.0564952	0.00040098	0.0210497
GOTERM_BP_FAT	GO:0051338~regulation of transferase activity	117	1.29125	1.30259e-05	ENSMUSG00000033170, ENSMUSG00000069631, ENSMUSG00000031714, ENSMUSG00000032501, ENSMUSG00000009621, ENSMUSG00000021453, ENSMUSG00000022788, ENSMUSG00000029026, ENSMUSG00000029586, ENSMUSG00000027582, ENSMUSG00000000276, ENSMUSG00000055980, ENSMUSG00000061393, ENSMUSG00000028062, ENSMUSG00000061878, ENSMUSG00000042626, ENSMUSG00000022114, ENSMUSG00000022770, ENSMUSG00000057342, ENSMUSG00000020601,…	5884	199	13588	1.35774	0.0665625	0.000471678	0.0249322
GOTERM_BP_FAT	GO:0006650~glycerophospholipid metabolic process	59	0.651142	1.49781e-05	ENSMUSG00000036833, ENSMUSG00000050229, ENSMUSG00000029330, ENSMUSG00000026737, ENSMUSG00000032540, ENSMUSG00000027695, ENSMUSG00000019877, ENSMUSG00000038861, ENSMUSG00000038383, ENSMUSG00000017721, ENSMUSG00000038417, ENSMUSG00000021518, ENSMUSG00000024867, ENSMUSG00000013663, ENSMUSG00000040430, ENSMUSG00000026925, ENSMUSG00000029263, ENSMUSG00000023791, ENSMUSG00000079469, ENSMUSG00000060733,…	5884	88	13588	1.54829	0.0761494	0.000538664	0.0286684
GOTERM_BP_FAT	GO:0043549~regulation of kinase activity	113	1.2471	1.7442e-05	ENSMUSG00000033170, ENSMUSG00000069631, ENSMUSG00000031714, ENSMUSG00000032501, ENSMUSG00000009621, ENSMUSG00000021453, ENSMUSG00000022788, ENSMUSG00000029026, ENSMUSG00000029586, ENSMUSG00000027582, ENSMUSG00000000276, ENSMUSG00000055980, ENSMUSG00000061393, ENSMUSG00000028062, ENSMUSG00000061878, ENSMUSG00000042626, ENSMUSG00000022114, ENSMUSG00000022770, ENSMUSG00000057342, ENSMUSG00000020601,…	5884	192	13588	1.35913	0.0881084	0.00062301	0.0333836
GOTERM_BP_FAT	GO:0006606~protein import into nucleus	41	0.452489	1.8488e-05	ENSMUSG00000055334, ENSMUSG00000000131, ENSMUSG00000029430, ENSMUSG00000001440, ENSMUSG00000002603, ENSMUSG00000055116, ENSMUSG00000042590, ENSMUSG00000036986, ENSMUSG00000030662, ENSMUSG00000018362, ENSMUSG00000032812, ENSMUSG00000020315, ENSMUSG00000059552, ENSMUSG00000002496, ENSMUSG00000037339, ENSMUSG00000038805, ENSMUSG00000031922, ENSMUSG00000038393, ENSMUSG00000057322, ENSMUSG00000037573,…	5884	56	13588	1.69075	0.0931386	0.00065593	0.0353853
GOTERM_BP_FAT	GO:0008654~phospholipid biosynthetic process	56	0.618033	1.95549e-05	ENSMUSG00000023452, ENSMUSG00000050229, ENSMUSG00000029330, ENSMUSG00000032540, ENSMUSG00000031545, ENSMUSG00000019877, ENSMUSG00000027695, ENSMUSG00000038383, ENSMUSG00000017721, ENSMUSG00000021518, ENSMUSG00000021665, ENSMUSG00000030682, ENSMUSG00000027357, ENSMUSG00000029263, ENSMUSG00000023791, ENSMUSG00000079469, ENSMUSG00000035845, ENSMUSG00000075703, ENSMUSG00000057342, ENSMUSG00000014245,…	5884	83	13588	1.55809	0.0982403	0.000689144	0.0374268
GOTERM_BP_FAT	GO:0001843~neural tube closure	31	0.342126	1.9747e-05	ENSMUSG00000029381, ENSMUSG00000047407, ENSMUSG00000041703, ENSMUSG00000018293, ENSMUSG00000035247, ENSMUSG00000020918, ENSMUSG00000028266, ENSMUSG00000020173, ENSMUSG00000020888, ENSMUSG00000031523, ENSMUSG00000022995, ENSMUSG00000021359, ENSMUSG00000023972, ENSMUSG00000036602, ENSMUSG00000019979, ENSMUSG00000002496, ENSMUSG00000027002, ENSMUSG00000022297, ENSMUSG00000058230, ENSMUSG00000030790,…	5884	39	13588	1.83561	0.0991559	0.000691305	0.0377944
GOTERM_BP_FAT	GO:0060606~tube closure	31	0.342126	1.9747e-05	ENSMUSG00000029381, ENSMUSG00000047407, ENSMUSG00000041703, ENSMUSG00000018293, ENSMUSG00000035247, ENSMUSG00000020918, ENSMUSG00000028266, ENSMUSG00000020173, ENSMUSG00000020888, ENSMUSG00000031523, ENSMUSG00000022995, ENSMUSG00000021359, ENSMUSG00000023972, ENSMUSG00000036602, ENSMUSG00000019979, ENSMUSG00000002496, ENSMUSG00000027002, ENSMUSG00000022297, ENSMUSG00000058230, ENSMUSG00000030790,…	5884	39	13588	1.83561	0.0991559	0.000691305	0.0377944
GOTERM_BP_FAT	GO:0015931~nucleobase, nucleoside, nucleotide and nucleic acid transport	51	0.562852	2.07854e-05	ENSMUSG00000003226, ENSMUSG00000028676, ENSMUSG00000032939, ENSMUSG00000040034, ENSMUSG00000050192, ENSMUSG00000057113, ENSMUSG00000034274, ENSMUSG00000025580, ENSMUSG00000020739, ENSMUSG00000022774, ENSMUSG00000028330, ENSMUSG00000019432, ENSMUSG00000001855, ENSMUSG00000053293, ENSMUSG00000075600, ENSMUSG00000036992, ENSMUSG00000024120, ENSMUSG00000040549, ENSMUSG00000017774, ENSMUSG00000078676,…	5884	74	13588	1.59155	0.104089	0.000722858	0.0397815
GOTERM_BP_FAT	GO:0051170~nuclear import	42	0.463525	2.1843e-05	ENSMUSG00000055334, ENSMUSG00000000131, ENSMUSG00000029430, ENSMUSG00000001440, ENSMUSG00000002603, ENSMUSG00000055116, ENSMUSG00000042590, ENSMUSG00000036986, ENSMUSG00000030662, ENSMUSG00000018362, ENSMUSG00000032812, ENSMUSG00000020315, ENSMUSG00000059552, ENSMUSG00000002496, ENSMUSG00000037339, ENSMUSG00000038805, ENSMUSG00000031922, ENSMUSG00000038393, ENSMUSG00000057322, ENSMUSG00000037573,…	5884	58	13588	1.67226	0.109086	0.000754663	0.0418053
GOTERM_BP_FAT	GO:0046474~glycerophospholipid biosynthetic process	35	0.386271	2.43405e-05	ENSMUSG00000027533, ENSMUSG00000024843, ENSMUSG00000029330, ENSMUSG00000050229, ENSMUSG00000032540, ENSMUSG00000026698, ENSMUSG00000027695, ENSMUSG00000038383, ENSMUSG00000017721, ENSMUSG00000037706, ENSMUSG00000021518, ENSMUSG00000030990, ENSMUSG00000022561, ENSMUSG00000078919, ENSMUSG00000022617, ENSMUSG00000029263, ENSMUSG00000037062, ENSMUSG00000023791, ENSMUSG00000079469, ENSMUSG00000045625,…	5884	46	13588	1.75709	0.120775	0.000835456	0.0465841
GOTERM_BP_FAT	GO:0044271~nitrogen compound biosynthetic process	167	1.84306	2.46535e-05	ENSMUSG00000031441, ENSMUSG00000022704, ENSMUSG00000001323, ENSMUSG00000038690, ENSMUSG00000050856, ENSMUSG00000020788, ENSMUSG00000038717, ENSMUSG00000005553, ENSMUSG00000003072, ENSMUSG00000053907, ENSMUSG00000018770, ENSMUSG00000006057, ENSMUSG00000015961, ENSMUSG00000022956, ENSMUSG00000036622, ENSMUSG00000022840, ENSMUSG00000026192, ENSMUSG00000033379, ENSMUSG00000042032, ENSMUSG00000027259,…	5884	302	13588	1.277	0.122229	0.000840739	0.0471831
GOTERM_BP_FAT	GO:0006401~RNA catabolic process	36	0.397307	3.01526e-05	ENSMUSG00000042772, ENSMUSG00000021127, ENSMUSG00000020495, ENSMUSG00000045817, ENSMUSG00000064030, ENSMUSG00000028675, ENSMUSG00000028842, ENSMUSG00000058301, ENSMUSG00000031683, ENSMUSG00000022685, ENSMUSG00000048696, ENSMUSG00000005682, ENSMUSG00000038290, ENSMUSG00000052928, ENSMUSG00000029647, ENSMUSG00000050966, ENSMUSG00000071757, ENSMUSG00000032498, ENSMUSG00000041477, ENSMUSG00000036875,…	5884	48	13588	1.73199	0.147387	0.00102159	0.0577046
GOTERM_BP_FAT	GO:0006479~protein amino acid methylation	33	0.364198	3.36188e-05	ENSMUSG00000052429, ENSMUSG00000013787, ENSMUSG00000019795, ENSMUSG00000003411, ENSMUSG00000024360, ENSMUSG00000074890, ENSMUSG00000021488, ENSMUSG00000049300, ENSMUSG00000024947, ENSMUSG00000029004, ENSMUSG00000036478, ENSMUSG00000060098, ENSMUSG00000044791, ENSMUSG00000029687, ENSMUSG00000019066, ENSMUSG00000030350, ENSMUSG00000032185, ENSMUSG00000030619, ENSMUSG00000045098, ENSMUSG00000036893,…	5884	43	13588	1.77226	0.162873	0.00113171	0.064336
GOTERM_BP_FAT	GO:0008213~protein amino acid alkylation	33	0.364198	3.36188e-05	ENSMUSG00000052429, ENSMUSG00000013787, ENSMUSG00000019795, ENSMUSG00000003411, ENSMUSG00000024360, ENSMUSG00000074890, ENSMUSG00000021488, ENSMUSG00000049300, ENSMUSG00000024947, ENSMUSG00000029004, ENSMUSG00000036478, ENSMUSG00000060098, ENSMUSG00000044791, ENSMUSG00000029687, ENSMUSG00000019066, ENSMUSG00000030350, ENSMUSG00000032185, ENSMUSG00000030619, ENSMUSG00000045098, ENSMUSG00000036893,…	5884	43	13588	1.77226	0.162873	0.00113171	0.064336
GOTERM_BP_FAT	GO:0009952~anterior/posterior pattern formation	92	1.01534	3.76349e-05	ENSMUSG00000033837, ENSMUSG00000030543, ENSMUSG00000007613, ENSMUSG00000020170, ENSMUSG00000046714, ENSMUSG00000023781, ENSMUSG00000008730, ENSMUSG00000026739, ENSMUSG00000026124, ENSMUSG00000031548, ENSMUSG00000038793, ENSMUSG00000000942, ENSMUSG00000018537, ENSMUSG00000018604, ENSMUSG00000032402, ENSMUSG00000024325, ENSMUSG00000014773, ENSMUSG00000021264, ENSMUSG00000052155, ENSMUSG00000022602,…	5884	153	13588	1.38861	0.180464	0.00125881	0.072019
GOTERM_BP_FAT	GO:0032535~regulation of cellular component size	96	1.05949	3.97918e-05	ENSMUSG00000005510, ENSMUSG00000033585, ENSMUSG00000018293, ENSMUSG00000020476, ENSMUSG00000002603, ENSMUSG00000029512, ENSMUSG00000031688, ENSMUSG00000000489, ENSMUSG00000038793, ENSMUSG00000023022, ENSMUSG00000021262, ENSMUSG00000028745, ENSMUSG00000029026, ENSMUSG00000028641, ENSMUSG00000002496, ENSMUSG00000037622, ENSMUSG00000057113, ENSMUSG00000021061, ENSMUSG00000058587, ENSMUSG00000034656,…	5884	161	13588	1.37698	0.189759	0.00132254	0.076145
GOTERM_BP_FAT	GO:0032259~methylation	53	0.584924	4.31931e-05	ENSMUSG00000055660, ENSMUSG00000030213, ENSMUSG00000052429, ENSMUSG00000024360, ENSMUSG00000074890, ENSMUSG00000024019, ENSMUSG00000036478, ENSMUSG00000060098, ENSMUSG00000044791, ENSMUSG00000029687, ENSMUSG00000019066, ENSMUSG00000030350, ENSMUSG00000032185, ENSMUSG00000045098, ENSMUSG00000036893, ENSMUSG00000062203, ENSMUSG00000028233, ENSMUSG00000039662, ENSMUSG00000030704, ENSMUSG00000023927,…	5884	79	13588	1.54929	0.204202	0.00142654	0.0826512
GOTERM_BP_FAT	GO:0000075~cell cycle checkpoint	38	0.41938	4.3633e-05	ENSMUSG00000032397, ENSMUSG00000032113, ENSMUSG00000070348, ENSMUSG00000052139, ENSMUSG00000026107, ENSMUSG00000042489, ENSMUSG00000019942, ENSMUSG00000041133, ENSMUSG00000032400, ENSMUSG00000020413, ENSMUSG00000028224, ENSMUSG00000036986, ENSMUSG00000043733, ENSMUSG00000024824, ENSMUSG00000006585, ENSMUSG00000005871, ENSMUSG00000031820, ENSMUSG00000059552, ENSMUSG00000032409, ENSMUSG00000022601,…	5884	52	13588	1.68758	0.206051	0.00143212	0.0834927
GOTERM_BP_FAT	GO:0030031~cell projection assembly	48	0.529743	4.68692e-05	ENSMUSG00000018126, ENSMUSG00000066877, ENSMUSG00000034706, ENSMUSG00000030733, ENSMUSG00000030276, ENSMUSG00000028868, ENSMUSG00000025401, ENSMUSG00000000489, ENSMUSG00000009621, ENSMUSG00000029528, ENSMUSG00000021823, ENSMUSG00000022788, ENSMUSG00000028745, ENSMUSG00000029684, ENSMUSG00000025856, ENSMUSG00000027274, ENSMUSG00000027111, ENSMUSG00000027002, ENSMUSG00000032740, ENSMUSG00000018012,…	5884	70	13588	1.58353	0.219523	0.00152877	0.0896824
GOTERM_BP_FAT	GO:0030384~phosphoinositide metabolic process	44	0.485598	5.37949e-05	ENSMUSG00000025949, ENSMUSG00000050229, ENSMUSG00000073678, ENSMUSG00000026737, ENSMUSG00000026698, ENSMUSG00000038861, ENSMUSG00000038383, ENSMUSG00000017721, ENSMUSG00000038417, ENSMUSG00000037706, ENSMUSG00000022973, ENSMUSG00000024867, ENSMUSG00000030990, ENSMUSG00000022561, ENSMUSG00000078919, ENSMUSG00000032462, ENSMUSG00000013663, ENSMUSG00000040430, ENSMUSG00000032594, ENSMUSG00000026925,…	5884	63	13588	1.61285	0.247591	0.00174372	0.102928
GOTERM_BP_FAT	GO:0006366~transcription from RNA polymerase II promoter	50	0.551815	5.65499e-05	ENSMUSG00000002658, ENSMUSG00000043962, ENSMUSG00000019302, ENSMUSG00000036376, ENSMUSG00000019738, ENSMUSG00000030291, ENSMUSG00000022828, ENSMUSG00000033543, ENSMUSG00000038489, ENSMUSG00000029250, ENSMUSG00000028266, ENSMUSG00000005198, ENSMUSG00000031585, ENSMUSG00000058886, ENSMUSG00000015882, ENSMUSG00000025408, ENSMUSG00000032402, ENSMUSG00000039117, ENSMUSG00000026751, ENSMUSG00000033020,…	5884	74	13588	1.56035	0.258473	0.00182178	0.108197
GOTERM_BP_FAT	GO:0006402~mRNA catabolic process	32	0.353162	5.84748e-05	ENSMUSG00000042772, ENSMUSG00000021127, ENSMUSG00000020495, ENSMUSG00000045817, ENSMUSG00000064030, ENSMUSG00000028675, ENSMUSG00000028842, ENSMUSG00000058301, ENSMUSG00000031683, ENSMUSG00000022685, ENSMUSG00000048696, ENSMUSG00000005682, ENSMUSG00000038290, ENSMUSG00000052928, ENSMUSG00000029647, ENSMUSG00000071757, ENSMUSG00000032498, ENSMUSG00000041477, ENSMUSG00000025580, ENSMUSG00000007050,…	5884	42	13588	1.75948	0.265983	0.00187233	0.111878
GOTERM_BP_FAT	GO:0000904~cell morphogenesis involved in differentiation	121	1.33539	5.8982e-05	ENSMUSG00000078970, ENSMUSG00000033585, ENSMUSG00000021109, ENSMUSG00000032446, ENSMUSG00000029512, ENSMUSG00000032259, ENSMUSG00000037868, ENSMUSG00000027967, ENSMUSG00000051650, ENSMUSG00000021262, ENSMUSG00000017724, ENSMUSG00000005958, ENSMUSG00000029168, ENSMUSG00000038593, ENSMUSG00000022443, ENSMUSG00000020902, ENSMUSG00000020900, ENSMUSG00000028832, ENSMUSG00000022055, ENSMUSG00000037171,…	5884	212	13588	1.31805	0.26795	0.00187719	0.112847
GOTERM_BP_FAT	GO:0008361~regulation of cell size	68	0.750469	6.39519e-05	ENSMUSG00000005510, ENSMUSG00000033585, ENSMUSG00000002603, ENSMUSG00000029512, ENSMUSG00000031688, ENSMUSG00000000489, ENSMUSG00000038793, ENSMUSG00000029026, ENSMUSG00000028641, ENSMUSG00000002496, ENSMUSG00000037622, ENSMUSG00000057113, ENSMUSG00000034656, ENSMUSG00000006728, ENSMUSG00000068744, ENSMUSG00000020902, ENSMUSG00000022838, ENSMUSG00000034684, ENSMUSG00000024497, ENSMUSG00000026317,…	5884	108	13588	1.45401	0.286939	0.00202303	0.122351
GOTERM_BP_FAT	GO:0051188~cofactor biosynthetic process	59	0.651142	6.50867e-05	ENSMUSG00000038240, ENSMUSG00000022742, ENSMUSG00000031782, ENSMUSG00000020935, ENSMUSG00000031543, ENSMUSG00000025825, ENSMUSG00000027618, ENSMUSG00000042751, ENSMUSG00000032293, ENSMUSG00000022503, ENSMUSG00000009566, ENSMUSG00000044792, ENSMUSG00000002280, ENSMUSG00000027452, ENSMUSG00000029993, ENSMUSG00000021061, ENSMUSG00000032786, ENSMUSG00000028684, ENSMUSG00000026784, ENSMUSG00000027605,…	5884	91	13588	1.49725	0.291206	0.00204665	0.124521
GOTERM_BP_FAT	GO:0045017~glycerolipid biosynthetic process	41	0.452489	6.78254e-05	ENSMUSG00000027533, ENSMUSG00000024843, ENSMUSG00000029330, ENSMUSG00000050229, ENSMUSG00000032540, ENSMUSG00000026698, ENSMUSG00000031545, ENSMUSG00000027695, ENSMUSG00000038383, ENSMUSG00000017721, ENSMUSG00000037706, ENSMUSG00000021518, ENSMUSG00000022561, ENSMUSG00000030990, ENSMUSG00000041653, ENSMUSG00000078919, ENSMUSG00000031985, ENSMUSG00000022617, ENSMUSG00000021759, ENSMUSG00000029263,…	5884	58	13588	1.63245	0.301397	0.00212008	0.129757
GOTERM_BP_FAT	GO:0007507~heart development	126	1.39057	7.59234e-05	ENSMUSG00000033837, ENSMUSG00000078970, ENSMUSG00000025969, ENSMUSG00000046714, ENSMUSG00000021109, ENSMUSG00000031714, ENSMUSG00000022842, ENSMUSG00000026124, ENSMUSG00000020888, ENSMUSG00000049577, ENSMUSG00000030067, ENSMUSG00000025314, ENSMUSG00000031965, ENSMUSG00000025076, ENSMUSG00000061393, ENSMUSG00000025216, ENSMUSG00000025880, ENSMUSG00000042626, ENSMUSG00000020900, ENSMUSG00000037171,…	5884	223	13588	1.30481	0.330683	0.00235897	0.145238
GOTERM_BP_FAT	GO:0034622~cellular macromolecular complex assembly	123	1.35747	7.7198e-05	ENSMUSG00000039361, ENSMUSG00000000131, ENSMUSG00000069272, ENSMUSG00000019773, ENSMUSG00000069274, ENSMUSG00000005470, ENSMUSG00000060743, ENSMUSG00000074210, ENSMUSG00000042590, ENSMUSG00000056895, ENSMUSG00000055760, ENSMUSG00000027253, ENSMUSG00000018509, ENSMUSG00000062380, ENSMUSG00000027763, ENSMUSG00000001525, ENSMUSG00000020409, ENSMUSG00000035198, ENSMUSG00000069268, ENSMUSG00000020086,…	5884	217	13588	1.30897	0.33518	0.00238451	0.147675
GOTERM_BP_FAT	GO:0030900~forebrain development	98	1.08156	7.79818e-05	ENSMUSG00000029478, ENSMUSG00000020170, ENSMUSG00000069171, ENSMUSG00000024565, ENSMUSG00000032446, ENSMUSG00000020745, ENSMUSG00000020849, ENSMUSG00000019777, ENSMUSG00000018501, ENSMUSG00000017485, ENSMUSG00000015053, ENSMUSG00000032259, ENSMUSG00000028800, ENSMUSG00000027967, ENSMUSG00000018604, ENSMUSG00000023391, ENSMUSG00000019979, ENSMUSG00000029026, ENSMUSG00000020037, ENSMUSG00000020122,…	5884	167	13588	1.35517	0.33793	0.00239471	0.149173
GOTERM_BP_FAT	GO:0002009~morphogenesis of an epithelium	101	1.11467	7.91136e-05	ENSMUSG00000029381, ENSMUSG00000030110, ENSMUSG00000020888, ENSMUSG00000002799, ENSMUSG00000031870, ENSMUSG00000023972, ENSMUSG00000019979, ENSMUSG00000017724, ENSMUSG00000020122, ENSMUSG00000025921, ENSMUSG00000025199, ENSMUSG00000038593, ENSMUSG00000025217, ENSMUSG00000030849, ENSMUSG00000015647, ENSMUSG00000030123, ENSMUSG00000060733, ENSMUSG00000022770, ENSMUSG00000027646, ENSMUSG00000037171,…	5884	173	13588	1.34821	0.341881	0.0024154	0.151337
GOTERM_BP_FAT	GO:0040007~growth	111	1.22503	8.01842e-05	ENSMUSG00000019428, ENSMUSG00000033585, ENSMUSG00000046714, ENSMUSG00000048756, ENSMUSG00000020128, ENSMUSG00000029512, ENSMUSG00000000489, ENSMUSG00000038793, ENSMUSG00000027253, ENSMUSG00000028707, ENSMUSG00000027454, ENSMUSG00000066595, ENSMUSG00000028641, ENSMUSG00000025921, ENSMUSG00000048758, ENSMUSG00000034612, ENSMUSG00000061393, ENSMUSG00000030849, ENSMUSG00000024811, ENSMUSG00000019969,…	5884	193	13588	1.32815	0.345596	0.00243399	0.153383
GOTERM_BP_FAT	GO:0043414~biopolymer methylation	48	0.529743	8.06564e-05	ENSMUSG00000004099, ENSMUSG00000002028, ENSMUSG00000030213, ENSMUSG00000013787, ENSMUSG00000052429, ENSMUSG00000019795, ENSMUSG00000003411, ENSMUSG00000024360, ENSMUSG00000074890, ENSMUSG00000021488, ENSMUSG00000049300, ENSMUSG00000024947, ENSMUSG00000036478, ENSMUSG00000029004, ENSMUSG00000060098, ENSMUSG00000044791, ENSMUSG00000040054, ENSMUSG00000029687, ENSMUSG00000019066, ENSMUSG00000030350,…	5884	71	13588	1.56123	0.347229	0.00243434	0.154286
GOTERM_BP_FAT	GO:0051174~regulation of phosphorus metabolic process	164	1.80995	8.30181e-05	ENSMUSG00000029613, ENSMUSG00000033170, ENSMUSG00000069631, ENSMUSG00000031714, ENSMUSG00000000489, ENSMUSG00000032501, ENSMUSG00000021453, ENSMUSG00000009621, ENSMUSG00000026196, ENSMUSG00000022788, ENSMUSG00000018570, ENSMUSG00000029586, ENSMUSG00000037166, ENSMUSG00000029026, ENSMUSG00000052155, ENSMUSG00000020122, ENSMUSG00000027582, ENSMUSG00000000276, ENSMUSG00000055980, ENSMUSG00000028062,…	5884	301	13588	1.25823	0.355331	0.00249131	0.1588
GOTERM_BP_FAT	GO:0019220~regulation of phosphate metabolic process	164	1.80995	8.30181e-05	ENSMUSG00000029613, ENSMUSG00000033170, ENSMUSG00000069631, ENSMUSG00000031714, ENSMUSG00000000489, ENSMUSG00000032501, ENSMUSG00000021453, ENSMUSG00000009621, ENSMUSG00000026196, ENSMUSG00000022788, ENSMUSG00000018570, ENSMUSG00000029586, ENSMUSG00000037166, ENSMUSG00000029026, ENSMUSG00000052155, ENSMUSG00000020122, ENSMUSG00000027582, ENSMUSG00000000276, ENSMUSG00000055980, ENSMUSG00000028062,…	5884	301	13588	1.25823	0.355331	0.00249131	0.1588
GOTERM_BP_FAT	GO:0007264~small GTPase mediated signal transduction	143	1.57819	8.50559e-05	ENSMUSG00000031442, ENSMUSG00000031504, ENSMUSG00000020476, ENSMUSG00000029518, ENSMUSG00000038387, ENSMUSG00000029512, ENSMUSG00000010529, ENSMUSG00000047187, ENSMUSG00000030643, ENSMUSG00000009621, ENSMUSG00000022957, ENSMUSG00000026433, ENSMUSG00000041112, ENSMUSG00000020121, ENSMUSG00000042303, ENSMUSG00000027519, ENSMUSG00000056515, ENSMUSG00000028068, ENSMUSG00000021062, ENSMUSG00000053291,…	5884	258	13588	1.27997	0.362241	0.00253799	0.162695
GOTERM_BP_FAT	GO:0042325~regulation of phosphorylation	158	1.74374	0.000113223	ENSMUSG00000029613, ENSMUSG00000033170, ENSMUSG00000069631, ENSMUSG00000031714, ENSMUSG00000000489, ENSMUSG00000032501, ENSMUSG00000021453, ENSMUSG00000009621, ENSMUSG00000026196, ENSMUSG00000022788, ENSMUSG00000029586, ENSMUSG00000037166, ENSMUSG00000029026, ENSMUSG00000052155, ENSMUSG00000020122, ENSMUSG00000027582, ENSMUSG00000000276, ENSMUSG00000055980, ENSMUSG00000028062, ENSMUSG00000061393,…	5884	290	13588	1.25818	0.450505	0.00335814	0.216517
GOTERM_BP_FAT	GO:0009259~ribonucleotide metabolic process	76	0.83876	0.000118209	ENSMUSG00000025968, ENSMUSG00000031441, ENSMUSG00000019210, ENSMUSG00000020788, ENSMUSG00000038690, ENSMUSG00000050856, ENSMUSG00000005553, ENSMUSG00000038717, ENSMUSG00000003072, ENSMUSG00000018770, ENSMUSG00000027823, ENSMUSG00000006057, ENSMUSG00000062683, ENSMUSG00000026576, ENSMUSG00000015961, ENSMUSG00000032087, ENSMUSG00000025192, ENSMUSG00000022956, ENSMUSG00000026575, ENSMUSG00000036622,…	5884	125	13588	1.40406	0.464805	0.00348623	0.226042
GOTERM_BP_FAT	GO:0046486~glycerolipid metabolic process	78	0.860832	0.000122665	ENSMUSG00000028158, ENSMUSG00000032114, ENSMUSG00000036833, ENSMUSG00000050229, ENSMUSG00000029330, ENSMUSG00000032540, ENSMUSG00000026737, ENSMUSG00000031545, ENSMUSG00000027695, ENSMUSG00000019877, ENSMUSG00000038861, ENSMUSG00000038383, ENSMUSG00000017721, ENSMUSG00000043733, ENSMUSG00000038417, ENSMUSG00000045294, ENSMUSG00000021518, ENSMUSG00000024867, ENSMUSG00000020334, ENSMUSG00000013663,…	5884	129	13588	1.39633	0.477272	0.00359737	0.234554
GOTERM_BP_FAT	GO:0007498~mesoderm development	41	0.452489	0.000122825	ENSMUSG00000033837, ENSMUSG00000046714, ENSMUSG00000009073, ENSMUSG00000066839, ENSMUSG00000032446, ENSMUSG00000027985, ENSMUSG00000028341, ENSMUSG00000012396, ENSMUSG00000024922, ENSMUSG00000027198, ENSMUSG00000028649, ENSMUSG00000023951, ENSMUSG00000032402, ENSMUSG00000018604, ENSMUSG00000020612, ENSMUSG00000024406, ENSMUSG00000052155, ENSMUSG00000003436, ENSMUSG00000008999, ENSMUSG00000006445,…	5884	59	13588	1.60478	0.477713	0.00358217	0.234859
GOTERM_BP_FAT	GO:0000902~cell morphogenesis	167	1.84306	0.000123848	ENSMUSG00000078970, ENSMUSG00000029381, ENSMUSG00000033585, ENSMUSG00000021109, ENSMUSG00000032446, ENSMUSG00000037815, ENSMUSG00000029512, ENSMUSG00000028059, ENSMUSG00000028649, ENSMUSG00000032259, ENSMUSG00000019261, ENSMUSG00000037868, ENSMUSG00000027967, ENSMUSG00000051650, ENSMUSG00000021262, ENSMUSG00000023972, ENSMUSG00000017724, ENSMUSG00000020122, ENSMUSG00000018387, ENSMUSG00000005958,…	5884	309	13588	1.24808	0.480532	0.00359216	0.236814
GOTERM_BP_FAT	GO:0032312~regulation of ARF GTPase activity	20	0.220726	0.000131035	ENSMUSG00000023353, ENSMUSG00000052632, ENSMUSG00000011877, ENSMUSG00000056413, ENSMUSG00000036995, ENSMUSG00000027575, ENSMUSG00000032870, ENSMUSG00000025422, ENSMUSG00000055013, ENSMUSG00000029033, ENSMUSG00000041890, ENSMUSG00000027255, ENSMUSG00000001588, ENSMUSG00000026159, ENSMUSG00000022377, ENSMUSG00000032812, ENSMUSG00000026155, ENSMUSG00000049076, ENSMUSG00000029722, ENSMUSG00000054277	5884	23	13588	2.0081	0.499905	0.00377949	0.250539
GOTERM_BP_FAT	GO:0032989~cellular component morphogenesis	187	2.06379	0.00013545	ENSMUSG00000078970, ENSMUSG00000029381, ENSMUSG00000033585, ENSMUSG00000021109, ENSMUSG00000032446, ENSMUSG00000037815, ENSMUSG00000029512, ENSMUSG00000028059, ENSMUSG00000028649, ENSMUSG00000032259, ENSMUSG00000029020, ENSMUSG00000019261, ENSMUSG00000037868, ENSMUSG00000027967, ENSMUSG00000051650, ENSMUSG00000021262, ENSMUSG00000023972, ENSMUSG00000017724, ENSMUSG00000020122, ENSMUSG00000018387,…	5884	351	13588	1.23032	0.511448	0.00388542	0.258971
GOTERM_BP_FAT	GO:0032012~regulation of ARF protein signal transduction	29	0.320053	0.000140953	ENSMUSG00000023353, ENSMUSG00000074582, ENSMUSG00000052632, ENSMUSG00000025224, ENSMUSG00000011877, ENSMUSG00000018001, ENSMUSG00000027575, ENSMUSG00000032870, ENSMUSG00000025422, ENSMUSG00000041890, ENSMUSG00000027255, ENSMUSG00000026159, ENSMUSG00000026155, ENSMUSG00000032812, ENSMUSG00000040797, ENSMUSG00000037126, ENSMUSG00000056413, ENSMUSG00000036995, ENSMUSG00000055013, ENSMUSG00000017132,…	5884	38	13588	1.76237	0.525462	0.00402115	0.269479
GOTERM_BP_FAT	GO:0048332~mesoderm morphogenesis	29	0.320053	0.000140953	ENSMUSG00000046714, ENSMUSG00000009073, ENSMUSG00000066839, ENSMUSG00000027985, ENSMUSG00000032446, ENSMUSG00000028341, ENSMUSG00000012396, ENSMUSG00000027198, ENSMUSG00000028649, ENSMUSG00000032402, ENSMUSG00000018604, ENSMUSG00000020612, ENSMUSG00000024406, ENSMUSG00000008999, ENSMUSG00000006445, ENSMUSG00000030699, ENSMUSG00000027002, ENSMUSG00000021796, ENSMUSG00000067336, ENSMUSG00000000125,…	5884	38	13588	1.76237	0.525462	0.00402115	0.269479
GOTERM_BP_FAT	GO:0030705~cytoskeleton-dependent intracellular transport	26	0.286944	0.000153429	ENSMUSG00000034593, ENSMUSG00000006930, ENSMUSG00000037032, ENSMUSG00000022892, ENSMUSG00000022443, ENSMUSG00000040714, ENSMUSG00000024862, ENSMUSG00000020745, ENSMUSG00000028868, ENSMUSG00000025733, ENSMUSG00000075284, ENSMUSG00000041794, ENSMUSG00000020900, ENSMUSG00000006740, ENSMUSG00000004677, ENSMUSG00000029207, ENSMUSG00000021262, ENSMUSG00000029757, ENSMUSG00000029104, ENSMUSG00000063077,…	5884	33	13588	1.81946	0.555762	0.00435284	0.293297
GOTERM_BP_FAT	GO:0051053~negative regulation of DNA metabolic process	18	0.198654	0.000154558	ENSMUSG00000024425, ENSMUSG00000032397, ENSMUSG00000005370, ENSMUSG00000030254, ENSMUSG00000021149, ENSMUSG00000042489, ENSMUSG00000020413, ENSMUSG00000030528, ENSMUSG00000041147, ENSMUSG00000029848, ENSMUSG00000074651, ENSMUSG00000006585, ENSMUSG00000006715, ENSMUSG00000026803, ENSMUSG00000024174, ENSMUSG00000059552, ENSMUSG00000032498, ENSMUSG00000024151	5884	20	13588	2.07838	0.558408	0.00436142	0.295453
GOTERM_BP_FAT	GO:0060429~epithelium development	148	1.63337	0.000163223	ENSMUSG00000078970, ENSMUSG00000029381, ENSMUSG00000030110, ENSMUSG00000020888, ENSMUSG00000002799, ENSMUSG00000031870, ENSMUSG00000023972, ENSMUSG00000017724, ENSMUSG00000019979, ENSMUSG00000025921, ENSMUSG00000020122, ENSMUSG00000025199, ENSMUSG00000038593, ENSMUSG00000025217, ENSMUSG00000020484, ENSMUSG00000015647, ENSMUSG00000030849, ENSMUSG00000038235, ENSMUSG00000060733, ENSMUSG00000030123,…	5884	271	13588	1.26117	0.578188	0.00458094	0.311993
GOTERM_BP_FAT	GO:0016055~Wnt receptor signaling pathway	78	0.860832	0.000174224	ENSMUSG00000053754, ENSMUSG00000029071, ENSMUSG00000000782, ENSMUSG00000028344, ENSMUSG00000022996, ENSMUSG00000020888, ENSMUSG00000031548, ENSMUSG00000028649, ENSMUSG00000045005, ENSMUSG00000032497, ENSMUSG00000022297, ENSMUSG00000003068, ENSMUSG00000047604, ENSMUSG00000000142, ENSMUSG00000003233, ENSMUSG00000020218, ENSMUSG00000024317, ENSMUSG00000035158, ENSMUSG00000001761, ENSMUSG00000002996,…	5884	130	13588	1.38559	0.602029	0.00486315	0.332986
GOTERM_BP_FAT	GO:0051336~regulation of hydrolase activity	111	1.22503	0.000186445	ENSMUSG00000029433, ENSMUSG00000029174, ENSMUSG00000051234, ENSMUSG00000039178, ENSMUSG00000032259, ENSMUSG00000027255, ENSMUSG00000019979, ENSMUSG00000018570, ENSMUSG00000027581, ENSMUSG00000035437, ENSMUSG00000042303, ENSMUSG00000024959, ENSMUSG00000031709, ENSMUSG00000060735, ENSMUSG00000040247, ENSMUSG00000056413, ENSMUSG00000022114, ENSMUSG00000039959, ENSMUSG00000050310, ENSMUSG00000023034,…	5884	196	13588	1.30783	0.626939	0.0051761	0.356304
GOTERM_BP_FAT	GO:0033043~regulation of organelle organization	90	0.993268	0.000192478	ENSMUSG00000064796, ENSMUSG00000003031, ENSMUSG00000064302, ENSMUSG00000018293, ENSMUSG00000020476, ENSMUSG00000002603, ENSMUSG00000018501, ENSMUSG00000028059, ENSMUSG00000023022, ENSMUSG00000018509, ENSMUSG00000027254, ENSMUSG00000035576, ENSMUSG00000021262, ENSMUSG00000042099, ENSMUSG00000028745, ENSMUSG00000025758, ENSMUSG00000000416, ENSMUSG00000027581, ENSMUSG00000028943, ENSMUSG00000031921,…	5884	154	13588	1.3496	0.638654	0.00531524	0.367813
GOTERM_BP_FAT	GO:0009411~response to UV	27	0.29798	0.000196197	ENSMUSG00000032397, ENSMUSG00000005370, ENSMUSG00000024588, ENSMUSG00000030254, ENSMUSG00000028960, ENSMUSG00000020413, ENSMUSG00000036986, ENSMUSG00000040681, ENSMUSG00000031628, ENSMUSG00000059552, ENSMUSG00000028560, ENSMUSG00000023067, ENSMUSG00000024151, ENSMUSG00000048787, ENSMUSG00000025076, ENSMUSG00000028914, ENSMUSG00000021694, ENSMUSG00000003873, ENSMUSG00000034485, ENSMUSG00000041147,…	5884	35	13588	1.78147	0.645694	0.00538956	0.374908
GOTERM_BP_FAT	GO:0051321~meiotic cell cycle	57	0.62907	0.000222049	ENSMUSG00000079470, ENSMUSG00000040385, ENSMUSG00000019773, ENSMUSG00000015597, ENSMUSG00000023977, ENSMUSG00000024922, ENSMUSG00000025480, ENSMUSG00000066306, ENSMUSG00000031928, ENSMUSG00000062248, ENSMUSG00000041775, ENSMUSG00000025487, ENSMUSG00000039748, ENSMUSG00000032498, ENSMUSG00000020380, ENSMUSG00000025977, ENSMUSG00000022443, ENSMUSG00000035198, ENSMUSG00000063576, ENSMUSG00000025586,…	5884	90	13588	1.46257	0.690972	0.0060661	0.424208
GOTERM_BP_FAT	GO:0009150~purine ribonucleotide metabolic process	72	0.794614	0.00022577	ENSMUSG00000025968, ENSMUSG00000031441, ENSMUSG00000019210, ENSMUSG00000038690, ENSMUSG00000020788, ENSMUSG00000050856, ENSMUSG00000005553, ENSMUSG00000038717, ENSMUSG00000003072, ENSMUSG00000018770, ENSMUSG00000027823, ENSMUSG00000006057, ENSMUSG00000062683, ENSMUSG00000026576, ENSMUSG00000015961, ENSMUSG00000032087, ENSMUSG00000026575, ENSMUSG00000022956, ENSMUSG00000036622, ENSMUSG00000033379,…	5884	119	13588	1.39723	0.696994	0.00613576	0.431301
GOTERM_BP_FAT	GO:0006310~DNA recombination	49	0.540779	0.000234882	ENSMUSG00000005370, ENSMUSG00000022471, ENSMUSG00000031311, ENSMUSG00000026107, ENSMUSG00000024943, ENSMUSG00000030528, ENSMUSG00000020413, ENSMUSG00000019303, ENSMUSG00000028224, ENSMUSG00000079109, ENSMUSG00000003868, ENSMUSG00000056394, ENSMUSG00000027433, ENSMUSG00000024906, ENSMUSG00000024174, ENSMUSG00000039748, ENSMUSG00000021287, ENSMUSG00000030067, ENSMUSG00000024151, ENSMUSG00000032498,…	5884	75	13588	1.50875	0.711253	0.00635003	0.448673
GOTERM_BP_FAT	GO:0007059~chromosome segregation	43	0.474561	0.000255065	ENSMUSG00000020652, ENSMUSG00000020492, ENSMUSG00000034349, ENSMUSG00000029516, ENSMUSG00000027635, ENSMUSG00000031858, ENSMUSG00000035351, ENSMUSG00000045273, ENSMUSG00000020914, ENSMUSG00000028729, ENSMUSG00000031010, ENSMUSG00000005233, ENSMUSG00000040034, ENSMUSG00000035024, ENSMUSG00000004865, ENSMUSG00000026039, ENSMUSG00000024791, ENSMUSG00000037286, ENSMUSG00000024056, ENSMUSG00000032498,…	5884	64	13588	1.55157	0.740488	0.00685879	0.487136
GOTERM_BP_FAT	GO:0051168~nuclear export	22	0.242799	0.000281164	ENSMUSG00000022538, ENSMUSG00000000131, ENSMUSG00000008301, ENSMUSG00000069631, ENSMUSG00000022774, ENSMUSG00000028676, ENSMUSG00000028330, ENSMUSG00000024359, ENSMUSG00000001855, ENSMUSG00000075600, ENSMUSG00000036992, ENSMUSG00000022812, ENSMUSG00000010097, ENSMUSG00000027787, ENSMUSG00000067150, ENSMUSG00000040312, ENSMUSG00000039509, ENSMUSG00000026027, ENSMUSG00000019715, ENSMUSG00000046434,…	5884	27	13588	1.88166	0.773951	0.00751983	0.536855
GOTERM_BP_FAT	GO:0000910~cytokinesis	22	0.242799	0.000281164	ENSMUSG00000026276, ENSMUSG00000028354, ENSMUSG00000022443, ENSMUSG00000024290, ENSMUSG00000029516, ENSMUSG00000038943, ENSMUSG00000017716, ENSMUSG00000020897, ENSMUSG00000026491, ENSMUSG00000020900, ENSMUSG00000041147, ENSMUSG00000024660, ENSMUSG00000036777, ENSMUSG00000002307, ENSMUSG00000005871, ENSMUSG00000032782, ENSMUSG00000056201, ENSMUSG00000027306, ENSMUSG00000021866, ENSMUSG00000032322,…	5884	27	13588	1.88166	0.773951	0.00751983	0.536855
GOTERM_BP_FAT	GO:0043623~cellular protein complex assembly	66	0.728396	0.000289672	ENSMUSG00000039361, ENSMUSG00000035505, ENSMUSG00000000131, ENSMUSG00000030357, ENSMUSG00000029071, ENSMUSG00000019773, ENSMUSG00000042590, ENSMUSG00000074210, ENSMUSG00000027253, ENSMUSG00000028019, ENSMUSG00000000416, ENSMUSG00000022913, ENSMUSG00000022607, ENSMUSG00000062380, ENSMUSG00000043091, ENSMUSG00000032498, ENSMUSG00000001525, ENSMUSG00000003923, ENSMUSG00000035198, ENSMUSG00000034656,…	5884	108	13588	1.41125	0.783898	0.00770755	0.553057
GOTERM_BP_FAT	GO:0048568~embryonic organ development	132	1.45679	0.000320908	ENSMUSG00000046714, ENSMUSG00000021109, ENSMUSG00000032446, ENSMUSG00000038248, ENSMUSG00000026739, ENSMUSG00000031714, ENSMUSG00000042594, ENSMUSG00000015053, ENSMUSG00000000942, ENSMUSG00000025408, ENSMUSG00000014773, ENSMUSG00000027868, ENSMUSG00000023391, ENSMUSG00000048904, ENSMUSG00000000690, ENSMUSG00000020122, ENSMUSG00000025921, ENSMUSG00000027315, ENSMUSG00000019971, ENSMUSG00000074622,…	5884	241	13588	1.26485	0.81681	0.00849253	0.612521
GOTERM_BP_FAT	GO:0045596~negative regulation of cell differentiation	103	1.13674	0.000336036	ENSMUSG00000027387, ENSMUSG00000035187, ENSMUSG00000029516, ENSMUSG00000037815, ENSMUSG00000029512, ENSMUSG00000014773, ENSMUSG00000023391, ENSMUSG00000029687, ENSMUSG00000036931, ENSMUSG00000037573, ENSMUSG00000039377, ENSMUSG00000025216, ENSMUSG00000000142, ENSMUSG00000038236, ENSMUSG00000020902, ENSMUSG00000018965, ENSMUSG00000037171, ENSMUSG00000048109, ENSMUSG00000019969, ENSMUSG00000004798,…	5884	182	13588	1.30692	0.830898	0.00884691	0.641308
GOTERM_BP_FAT	GO:0051656~establishment of organelle localization	26	0.286944	0.000341184	ENSMUSG00000022568, ENSMUSG00000034593, ENSMUSG00000028354, ENSMUSG00000022443, ENSMUSG00000021248, ENSMUSG00000026490, ENSMUSG00000025733, ENSMUSG00000017716, ENSMUSG00000020902, ENSMUSG00000024948, ENSMUSG00000020900, ENSMUSG00000026605, ENSMUSG00000027787, ENSMUSG00000019969, ENSMUSG00000027306, ENSMUSG00000063887, ENSMUSG00000079614, ENSMUSG00000024791, ENSMUSG00000063077, ENSMUSG00000017686,…	5884	34	13588	1.76595	0.835442	0.00893738	0.651103
GOTERM_BP_FAT	GO:0000079~regulation of cyclin-dependent protein kinase activity	15	0.165545	0.000344822	ENSMUSG00000079356, ENSMUSG00000044303, ENSMUSG00000003031, ENSMUSG00000021149, ENSMUSG00000018669, ENSMUSG00000040021, ENSMUSG00000052525, ENSMUSG00000027487, ENSMUSG00000031628, ENSMUSG00000021959, ENSMUSG00000005871, ENSMUSG00000029586, ENSMUSG00000023067, ENSMUSG00000047281, ENSMUSG00000048878, ENSMUSG00000030983	5884	16	13588	2.16498	0.838578	0.00898776	0.658025
GOTERM_BP_FAT	GO:0007369~gastrulation	48	0.529743	0.000352786	ENSMUSG00000006215, ENSMUSG00000020170, ENSMUSG00000025223, ENSMUSG00000046714, ENSMUSG00000038671, ENSMUSG00000022702, ENSMUSG00000009073, ENSMUSG00000066839, ENSMUSG00000021488, ENSMUSG00000032446, ENSMUSG00000027985, ENSMUSG00000028341, ENSMUSG00000012396, ENSMUSG00000026124, ENSMUSG00000028517, ENSMUSG00000038793, ENSMUSG00000004364, ENSMUSG00000027198, ENSMUSG00000028649, ENSMUSG00000032402,…	5884	74	13588	1.49793	0.845237	0.00914932	0.673173
GOTERM_BP_FAT	GO:0007167~enzyme linked receptor protein signaling pathway	147	1.62234	0.000401023	ENSMUSG00000033837, ENSMUSG00000032584, ENSMUSG00000033585, ENSMUSG00000046714, ENSMUSG00000031714, ENSMUSG00000032253, ENSMUSG00000030110, ENSMUSG00000028907, ENSMUSG00000000489, ENSMUSG00000027253, ENSMUSG00000040631, ENSMUSG00000023972, ENSMUSG00000029710, ENSMUSG00000052155, ENSMUSG00000020122, ENSMUSG00000027316, ENSMUSG00000029231, ENSMUSG00000055980, ENSMUSG00000037573, ENSMUSG00000005958,…	5884	273	13588	1.24348	0.880092	0.0103434	0.764882
GOTERM_BP_FAT	GO:0001707~mesoderm formation	27	0.29798	0.000415533	ENSMUSG00000027002, ENSMUSG00000030699, ENSMUSG00000021796, ENSMUSG00000067336, ENSMUSG00000046714, ENSMUSG00000000125, ENSMUSG00000066839, ENSMUSG00000009073, ENSMUSG00000032446, ENSMUSG00000027985, ENSMUSG00000068327, ENSMUSG00000028341, ENSMUSG00000030849, ENSMUSG00000012396, ENSMUSG00000005469, ENSMUSG00000027198, ENSMUSG00000024098, ENSMUSG00000028649, ENSMUSG00000032402, ENSMUSG00000020250,…	5884	36	13588	1.73199	0.888953	0.0106637	0.792455
GOTERM_BP_FAT	GO:0007219~Notch signaling pathway	37	0.408343	0.000440973	ENSMUSG00000030543, ENSMUSG00000040415, ENSMUSG00000020052, ENSMUSG00000032375, ENSMUSG00000040761, ENSMUSG00000046714, ENSMUSG00000001300, ENSMUSG00000023781, ENSMUSG00000055022, ENSMUSG00000002799, ENSMUSG00000014773, ENSMUSG00000003436, ENSMUSG00000036835, ENSMUSG00000036766, ENSMUSG00000027314, ENSMUSG00000026019, ENSMUSG00000027276, ENSMUSG00000020692, ENSMUSG00000026923, ENSMUSG00000052593,…	5884	54	13588	1.58231	0.902935	0.0112584	0.840776
GOTERM_BP_FAT	GO:0035282~segmentation	37	0.408343	0.000440973	ENSMUSG00000030543, ENSMUSG00000020170, ENSMUSG00000046714, ENSMUSG00000037034, ENSMUSG00000027985, ENSMUSG00000023781, ENSMUSG00000055024, ENSMUSG00000020918, ENSMUSG00000031548, ENSMUSG00000020888, ENSMUSG00000037868, ENSMUSG00000032402, ENSMUSG00000018604, ENSMUSG00000038000, ENSMUSG00000014773, ENSMUSG00000003436, ENSMUSG00000059552, ENSMUSG00000032494, ENSMUSG00000048402, ENSMUSG00000074622,…	5884	54	13588	1.58231	0.902935	0.0112584	0.840776
GOTERM_BP_FAT	GO:0060284~regulation of cell development	91	1.0043	0.000469365	ENSMUSG00000048482, ENSMUSG00000035187, ENSMUSG00000029516, ENSMUSG00000002603, ENSMUSG00000037815, ENSMUSG00000029512, ENSMUSG00000032259, ENSMUSG00000036478, ENSMUSG00000018604, ENSMUSG00000034384, ENSMUSG00000014773, ENSMUSG00000023391, ENSMUSG00000021451, ENSMUSG00000020027, ENSMUSG00000022607, ENSMUSG00000048402, ENSMUSG00000048616, ENSMUSG00000028946, ENSMUSG00000026923, ENSMUSG00000010175,…	5884	159	13588	1.32168	0.916473	0.0119215	0.89468
GOTERM_BP_FAT	GO:0051327~M phase of meiotic cell cycle	55	0.606997	0.000470575	ENSMUSG00000079470, ENSMUSG00000040385, ENSMUSG00000019773, ENSMUSG00000015597, ENSMUSG00000023977, ENSMUSG00000024922, ENSMUSG00000025480, ENSMUSG00000031928, ENSMUSG00000062248, ENSMUSG00000041775, ENSMUSG00000025487, ENSMUSG00000039748, ENSMUSG00000032498, ENSMUSG00000020380, ENSMUSG00000025977, ENSMUSG00000022443, ENSMUSG00000063576, ENSMUSG00000025586, ENSMUSG00000032221, ENSMUSG00000020390,…	5884	88	13588	1.44332	0.917006	0.011895	0.896976
GOTERM_BP_FAT	GO:0007126~meiosis	55	0.606997	0.000470575	ENSMUSG00000079470, ENSMUSG00000040385, ENSMUSG00000019773, ENSMUSG00000015597, ENSMUSG00000023977, ENSMUSG00000024922, ENSMUSG00000025480, ENSMUSG00000031928, ENSMUSG00000062248, ENSMUSG00000041775, ENSMUSG00000025487, ENSMUSG00000039748, ENSMUSG00000032498, ENSMUSG00000020380, ENSMUSG00000025977, ENSMUSG00000022443, ENSMUSG00000063576, ENSMUSG00000025586, ENSMUSG00000032221, ENSMUSG00000020390,…	5884	88	13588	1.44332	0.917006	0.011895	0.896976
GOTERM_BP_FAT	GO:0043967~histone H4 acetylation	18	0.198654	0.000482372	ENSMUSG00000003778, ENSMUSG00000020171, ENSMUSG00000062270, ENSMUSG00000030330, ENSMUSG00000025764, ENSMUSG00000037032, ENSMUSG00000038909, ENSMUSG00000020918, ENSMUSG00000020387, ENSMUSG00000029505, ENSMUSG00000027671, ENSMUSG00000028863, ENSMUSG00000009640, ENSMUSG00000020167, ENSMUSG00000029670, ENSMUSG00000003868, ENSMUSG00000045482, ENSMUSG00000030079	5884	21	13588	1.97941	0.922027	0.0121334	0.919363
GOTERM_BP_FAT	GO:0007346~regulation of mitotic cell cycle	59	0.651142	0.000523866	ENSMUSG00000022369, ENSMUSG00000019773, ENSMUSG00000002603, ENSMUSG00000032400, ENSMUSG00000075334, ENSMUSG00000035576, ENSMUSG00000048904, ENSMUSG00000022601, ENSMUSG00000066551, ENSMUSG00000055670, ENSMUSG00000024399, ENSMUSG00000035198, ENSMUSG00000022770, ENSMUSG00000027499, ENSMUSG00000018965, ENSMUSG00000020184, ENSMUSG00000024454, ENSMUSG00000026605, ENSMUSG00000043991, ENSMUSG00000041147,…	5884	96	13588	1.41927	0.937396	0.0131082	0.998073
GOTERM_BP_FAT	GO:0040008~regulation of growth	138	1.52301	0.000573602	ENSMUSG00000027381, ENSMUSG00000033585, ENSMUSG00000046714, ENSMUSG00000021109, ENSMUSG00000018501, ENSMUSG00000029512, ENSMUSG00000022781, ENSMUSG00000032259, ENSMUSG00000034384, ENSMUSG00000066595, ENSMUSG00000029026, ENSMUSG00000005069, ENSMUSG00000027394, ENSMUSG00000025213, ENSMUSG00000039377, ENSMUSG00000030849, ENSMUSG00000042626, ENSMUSG00000020902, ENSMUSG00000022770, ENSMUSG00000022838,…	5884	256	13588	1.24486	0.951881	0.0142766	1.09234
GOTERM_BP_FAT	GO:0010721~negative regulation of cell development	29	0.320053	0.00057487	ENSMUSG00000040785, ENSMUSG00000048482, ENSMUSG00000035187, ENSMUSG00000029634, ENSMUSG00000002603, ENSMUSG00000029516, ENSMUSG00000037815, ENSMUSG00000029512, ENSMUSG00000028664, ENSMUSG00000047139, ENSMUSG00000023391, ENSMUSG00000020458, ENSMUSG00000008999, ENSMUSG00000041309, ENSMUSG00000059552, ENSMUSG00000022607, ENSMUSG00000049556, ENSMUSG00000048616, ENSMUSG00000021796, ENSMUSG00000020716,…	5884	40	13588	1.67425	0.952203	0.014241	1.09474
GOTERM_BP_FAT	GO:0031570~DNA integrity checkpoint	25	0.275908	0.000587807	ENSMUSG00000032397, ENSMUSG00000032113, ENSMUSG00000070348, ENSMUSG00000052139, ENSMUSG00000042489, ENSMUSG00000019942, ENSMUSG00000020413, ENSMUSG00000028224, ENSMUSG00000036986, ENSMUSG00000024824, ENSMUSG00000043733, ENSMUSG00000006585, ENSMUSG00000031820, ENSMUSG00000059552, ENSMUSG00000032409, ENSMUSG00000024151, ENSMUSG00000034218, ENSMUSG00000049932, ENSMUSG00000053436, ENSMUSG00000029848,…	5884	33	13588	1.74948	0.955365	0.0144913	1.11925
GOTERM_BP_FAT	GO:0000956~nuclear-transcribed mRNA catabolic process	25	0.275908	0.000587807	ENSMUSG00000042772, ENSMUSG00000041477, ENSMUSG00000021127, ENSMUSG00000020495, ENSMUSG00000025580, ENSMUSG00000045817, ENSMUSG00000064030, ENSMUSG00000022774, ENSMUSG00000030655, ENSMUSG00000028675, ENSMUSG00000028330, ENSMUSG00000058301, ENSMUSG00000034681, ENSMUSG00000021460, ENSMUSG00000022685, ENSMUSG00000005682, ENSMUSG00000038290, ENSMUSG00000029647, ENSMUSG00000052928, ENSMUSG00000001415,…	5884	33	13588	1.74948	0.955365	0.0144913	1.11925
GOTERM_BP_FAT	GO:0010970~microtubule-based transport	16	0.176581	0.000601422	ENSMUSG00000022892, ENSMUSG00000006930, ENSMUSG00000024862, ENSMUSG00000040714, ENSMUSG00000020745, ENSMUSG00000025733, ENSMUSG00000006740, ENSMUSG00000029757, ENSMUSG00000029104, ENSMUSG00000017686, ENSMUSG00000029223, ENSMUSG00000063077, ENSMUSG00000021288, ENSMUSG00000018736, ENSMUSG00000026131, ENSMUSG00000000738	5884	18	13588	2.05272	0.958467	0.0147558	1.14503
GOTERM_BP_FAT	GO:0006275~regulation of DNA replication	16	0.176581	0.000601422	ENSMUSG00000032740, ENSMUSG00000032397, ENSMUSG00000036875, ENSMUSG00000064796, ENSMUSG00000021149, ENSMUSG00000007872, ENSMUSG00000042489, ENSMUSG00000020413, ENSMUSG00000027342, ENSMUSG00000041147, ENSMUSG00000029848, ENSMUSG00000074651, ENSMUSG00000006585, ENSMUSG00000006715, ENSMUSG00000026803, ENSMUSG00000059552	5884	18	13588	2.05272	0.958467	0.0147558	1.14503
GOTERM_BP_FAT	GO:0010551~regulation of specific transcription from RNA polymerase II promoter	35	0.386271	0.000632616	ENSMUSG00000000134, ENSMUSG00000005373, ENSMUSG00000035187, ENSMUSG00000001288, ENSMUSG00000022996, ENSMUSG00000022528, ENSMUSG00000034957, ENSMUSG00000028800, ENSMUSG00000023391, ENSMUSG00000021575, ENSMUSG00000052293, ENSMUSG00000041309, ENSMUSG00000021944, ENSMUSG00000023990, ENSMUSG00000024986, ENSMUSG00000022346, ENSMUSG00000037622, ENSMUSG00000066551, ENSMUSG00000028946, ENSMUSG00000037638,…	5884	51	13588	1.58482	0.964787	0.0154438	1.20408
GOTERM_BP_FAT	GO:0033673~negative regulation of kinase activity	35	0.386271	0.000632616	ENSMUSG00000020227, ENSMUSG00000044303, ENSMUSG00000037211, ENSMUSG00000003031, ENSMUSG00000009073, ENSMUSG00000027487, ENSMUSG00000037239, ENSMUSG00000036390, ENSMUSG00000021453, ENSMUSG00000031628, ENSMUSG00000027177, ENSMUSG00000015312, ENSMUSG00000050965, ENSMUSG00000032715, ENSMUSG00000005871, ENSMUSG00000029026, ENSMUSG00000045671, ENSMUSG00000023067, ENSMUSG00000002496, ENSMUSG00000048878,…	5884	51	13588	1.58482	0.964787	0.0154438	1.20408
GOTERM_BP_FAT	GO:0006469~negative regulation of protein kinase activity	35	0.386271	0.000632616	ENSMUSG00000020227, ENSMUSG00000044303, ENSMUSG00000037211, ENSMUSG00000003031, ENSMUSG00000009073, ENSMUSG00000027487, ENSMUSG00000037239, ENSMUSG00000036390, ENSMUSG00000021453, ENSMUSG00000031628, ENSMUSG00000027177, ENSMUSG00000015312, ENSMUSG00000050965, ENSMUSG00000032715, ENSMUSG00000005871, ENSMUSG00000029026, ENSMUSG00000045671, ENSMUSG00000023067, ENSMUSG00000002496, ENSMUSG00000048878,…	5884	51	13588	1.58482	0.964787	0.0154438	1.20408
GOTERM_BP_FAT	GO:0050767~regulation of neurogenesis	77	0.849796	0.000637138	ENSMUSG00000048482, ENSMUSG00000035187, ENSMUSG00000029516, ENSMUSG00000002603, ENSMUSG00000037815, ENSMUSG00000029512, ENSMUSG00000032259, ENSMUSG00000034384, ENSMUSG00000014773, ENSMUSG00000023391, ENSMUSG00000021451, ENSMUSG00000020027, ENSMUSG00000022607, ENSMUSG00000048402, ENSMUSG00000048616, ENSMUSG00000028946, ENSMUSG00000026923, ENSMUSG00000027394, ENSMUSG00000027358, ENSMUSG00000024294,…	5884	132	13588	1.3471	0.965619	0.015482	1.21264
GOTERM_BP_FAT	GO:0008286~insulin receptor signaling pathway	22	0.242799	0.000665262	ENSMUSG00000020091, ENSMUSG00000055980, ENSMUSG00000037112, ENSMUSG00000057177, ENSMUSG00000031490, ENSMUSG00000026791, ENSMUSG00000027540, ENSMUSG00000046714, ENSMUSG00000041417, ENSMUSG00000032253, ENSMUSG00000038485, ENSMUSG00000005534, ENSMUSG00000028698, ENSMUSG00000001729, ENSMUSG00000031834, ENSMUSG00000038894, ENSMUSG00000005057, ENSMUSG00000020546, ENSMUSG00000044167, ENSMUSG00000042903,…	5884	28	13588	1.81446	0.970373	0.0160861	1.26584
GOTERM_BP_FAT	GO:0051789~response to protein stimulus	54	0.595961	0.000678459	ENSMUSG00000002603, ENSMUSG00000040482, ENSMUSG00000028343, ENSMUSG00000038418, ENSMUSG00000022884, ENSMUSG00000025408, ENSMUSG00000007039, ENSMUSG00000044791, ENSMUSG00000008429, ENSMUSG00000025757, ENSMUSG00000007036, ENSMUSG00000022365, ENSMUSG00000003534, ENSMUSG00000061207, ENSMUSG00000032575, ENSMUSG00000029468, ENSMUSG00000036185, ENSMUSG00000038665, ENSMUSG00000021377, ENSMUSG00000007029,…	5884	87	13588	1.43337	0.972371	0.0163281	1.2908
GOTERM_BP_FAT	GO:0051348~negative regulation of transferase activity	36	0.397307	0.000690279	ENSMUSG00000020227, ENSMUSG00000044303, ENSMUSG00000037211, ENSMUSG00000003031, ENSMUSG00000009073, ENSMUSG00000027487, ENSMUSG00000037239, ENSMUSG00000036390, ENSMUSG00000021453, ENSMUSG00000031628, ENSMUSG00000027177, ENSMUSG00000015312, ENSMUSG00000050965, ENSMUSG00000032715, ENSMUSG00000005871, ENSMUSG00000029026, ENSMUSG00000045671, ENSMUSG00000023067, ENSMUSG00000002496, ENSMUSG00000048878,…	5884	53	13588	1.56859	0.974047	0.0165351	1.31314
GOTERM_BP_FAT	GO:0045792~negative regulation of cell size	36	0.397307	0.000690279	ENSMUSG00000005510, ENSMUSG00000044303, ENSMUSG00000037032, ENSMUSG00000029634, ENSMUSG00000036199, ENSMUSG00000002603, ENSMUSG00000029512, ENSMUSG00000036986, ENSMUSG00000056493, ENSMUSG00000001729, ENSMUSG00000008384, ENSMUSG00000041241, ENSMUSG00000020458, ENSMUSG00000029026, ENSMUSG00000059552, ENSMUSG00000002496, ENSMUSG00000062762, ENSMUSG00000028991, ENSMUSG00000048787, ENSMUSG00000027663,…	5884	53	13588	1.56859	0.974047	0.0165351	1.31314
GOTERM_BP_FAT	GO:0008629~induction of apoptosis by intracellular signals	26	0.286944	0.000703651	ENSMUSG00000005370, ENSMUSG00000030717, ENSMUSG00000029433, ENSMUSG00000008730, ENSMUSG00000051234, ENSMUSG00000017146, ENSMUSG00000036986, ENSMUSG00000031628, ENSMUSG00000050965, ENSMUSG00000053175, ENSMUSG00000059552, ENSMUSG00000022346, ENSMUSG00000041801, ENSMUSG00000032498, ENSMUSG00000037787, ENSMUSG00000003873, ENSMUSG00000068329, ENSMUSG00000034485, ENSMUSG00000034218, ENSMUSG00000022838,…	5884	35	13588	1.71549	0.97582	0.0167768	1.33842
GOTERM_BP_FAT	GO:0051129~negative regulation of cellular component organization	57	0.62907	0.000728942	ENSMUSG00000040276, ENSMUSG00000064302, ENSMUSG00000018293, ENSMUSG00000020476, ENSMUSG00000029516, ENSMUSG00000002603, ENSMUSG00000029512, ENSMUSG00000028059, ENSMUSG00000023022, ENSMUSG00000027254, ENSMUSG00000021262, ENSMUSG00000042099, ENSMUSG00000028745, ENSMUSG00000027257, ENSMUSG00000022607, ENSMUSG00000028943, ENSMUSG00000013663, ENSMUSG00000032479, ENSMUSG00000021061, ENSMUSG00000058587,…	5884	93	13588	1.41539	0.978849	0.0172969	1.38621
GOTERM_BP_FAT	GO:0001764~neuron migration	45	0.496634	0.000745777	ENSMUSG00000019794, ENSMUSG00000020052, ENSMUSG00000033585, ENSMUSG00000037032, ENSMUSG00000061353, ENSMUSG00000069171, ENSMUSG00000021055, ENSMUSG00000020745, ENSMUSG00000020849, ENSMUSG00000017485, ENSMUSG00000027967, ENSMUSG00000073043, ENSMUSG00000028519, ENSMUSG00000034384, ENSMUSG00000020283, ENSMUSG00000038331, ENSMUSG00000009418, ENSMUSG00000043557, ENSMUSG00000000416, ENSMUSG00000026826,…	5884	70	13588	1.48456	0.980651	0.0176139	1.41801
GOTERM_BP_FAT	GO:0016458~gene silencing	38	0.41938	0.000802883	ENSMUSG00000004099, ENSMUSG00000001424, ENSMUSG00000025571, ENSMUSG00000035478, ENSMUSG00000027018, ENSMUSG00000031527, ENSMUSG00000031715, ENSMUSG00000028842, ENSMUSG00000025578, ENSMUSG00000052707, ENSMUSG00000067150, ENSMUSG00000070697, ENSMUSG00000040054, ENSMUSG00000029524, ENSMUSG00000002227, ENSMUSG00000025486, ENSMUSG00000050966, ENSMUSG00000034748, ENSMUSG00000032187, ENSMUSG00000020661,…	5884	57	13588	1.53954	0.985698	0.0188662	1.5258
GOTERM_BP_FAT	GO:0009152~purine ribonucleotide biosynthetic process	64	0.706324	0.000812567	ENSMUSG00000031441, ENSMUSG00000019210, ENSMUSG00000038690, ENSMUSG00000020788, ENSMUSG00000050856, ENSMUSG00000005553, ENSMUSG00000038717, ENSMUSG00000003072, ENSMUSG00000018770, ENSMUSG00000027823, ENSMUSG00000006057, ENSMUSG00000062683, ENSMUSG00000026576, ENSMUSG00000015961, ENSMUSG00000032087, ENSMUSG00000026575, ENSMUSG00000022956, ENSMUSG00000036622, ENSMUSG00000033379, ENSMUSG00000026192,…	5884	107	13588	1.38127	0.986412	0.0190072	1.54407
GOTERM_BP_FAT	GO:0006997~nucleus organization	32	0.353162	0.000825455	ENSMUSG00000022455, ENSMUSG00000020745, ENSMUSG00000036199, ENSMUSG00000020430, ENSMUSG00000036986, ENSMUSG00000043207, ENSMUSG00000031628, ENSMUSG00000022682, ENSMUSG00000026159, ENSMUSG00000047139, ENSMUSG00000015176, ENSMUSG00000019996, ENSMUSG00000019979, ENSMUSG00000015337, ENSMUSG00000029027, ENSMUSG00000036817, ENSMUSG00000022346, ENSMUSG00000018559, ENSMUSG00000071359, ENSMUSG00000028974,…	5884	46	13588	1.60648	0.987308	0.0192209	1.56837
GOTERM_BP_FAT	GO:0009260~ribonucleotide biosynthetic process	66	0.728396	0.000828314	ENSMUSG00000031441, ENSMUSG00000019210, ENSMUSG00000020788, ENSMUSG00000038690, ENSMUSG00000050856, ENSMUSG00000005553, ENSMUSG00000038717, ENSMUSG00000003072, ENSMUSG00000018770, ENSMUSG00000027823, ENSMUSG00000006057, ENSMUSG00000062683, ENSMUSG00000026576, ENSMUSG00000015961, ENSMUSG00000032087, ENSMUSG00000026575, ENSMUSG00000022956, ENSMUSG00000036622, ENSMUSG00000033379, ENSMUSG00000026192,…	5884	111	13588	1.37311	0.987499	0.0192023	1.57376
GOTERM_BP_FAT	GO:0030182~neuron differentiation	205	2.26244	0.000844628	ENSMUSG00000071866, ENSMUSG00000035187, ENSMUSG00000019777, ENSMUSG00000026255, ENSMUSG00000030110, ENSMUSG00000032259, ENSMUSG00000017721, ENSMUSG00000038417, ENSMUSG00000002799, ENSMUSG00000021262, ENSMUSG00000023391, ENSMUSG00000026735, ENSMUSG00000017724, ENSMUSG00000056579, ENSMUSG00000062380, ENSMUSG00000025380, ENSMUSG00000019971, ENSMUSG00000029168, ENSMUSG00000025216, ENSMUSG00000053398,…	5884	399	13588	1.18649	0.988533	0.0194916	1.60452
GOTERM_BP_FAT	GO:0006730~one-carbon metabolic process	69	0.761505	0.00084586	ENSMUSG00000055660, ENSMUSG00000030213, ENSMUSG00000052429, ENSMUSG00000024360, ENSMUSG00000074890, ENSMUSG00000053907, ENSMUSG00000009566, ENSMUSG00000024019, ENSMUSG00000025403, ENSMUSG00000036478, ENSMUSG00000003273, ENSMUSG00000020534, ENSMUSG00000060098, ENSMUSG00000044791, ENSMUSG00000029687, ENSMUSG00000042032, ENSMUSG00000019066, ENSMUSG00000030350, ENSMUSG00000032185, ENSMUSG00000002769,…	5884	117	13588	1.3619	0.988607	0.019435	1.60685
GOTERM_BP_FAT	GO:0016311~dephosphorylation	81	0.893941	0.00085661	ENSMUSG00000013236, ENSMUSG00000027698, ENSMUSG00000033278, ENSMUSG00000004455, ENSMUSG00000028886, ENSMUSG00000040385, ENSMUSG00000003438, ENSMUSG00000034765, ENSMUSG00000034573, ENSMUSG00000032290, ENSMUSG00000028909, ENSMUSG00000043733, ENSMUSG00000024525, ENSMUSG00000046442, ENSMUSG00000028788, ENSMUSG00000038042, ENSMUSG00000049225, ENSMUSG00000013663, ENSMUSG00000025314, ENSMUSG00000030223,…	5884	141	13588	1.32663	0.989238	0.0195945	1.62711
GOTERM_BP_FAT	GO:0016571~histone methylation	20	0.220726	0.000921257	ENSMUSG00000013787, ENSMUSG00000045098, ENSMUSG00000021488, ENSMUSG00000036893, ENSMUSG00000059851, ENSMUSG00000049300, ENSMUSG00000024947, ENSMUSG00000029004, ENSMUSG00000060098, ENSMUSG00000044791, ENSMUSG00000017548, ENSMUSG00000029687, ENSMUSG00000023927, ENSMUSG00000038056, ENSMUSG00000029913, ENSMUSG00000026646, ENSMUSG00000030350, ENSMUSG00000032185, ENSMUSG00000031458, ENSMUSG00000030619	5884	25	13588	1.84745	0.992356	0.0209677	1.74888
GOTERM_BP_FAT	GO:0060485~mesenchyme development	34	0.375235	0.00099086	ENSMUSG00000078970, ENSMUSG00000025969, ENSMUSG00000024987, ENSMUSG00000046714, ENSMUSG00000021109, ENSMUSG00000002603, ENSMUSG00000027985, ENSMUSG00000032446, ENSMUSG00000030110, ENSMUSG00000022122, ENSMUSG00000033953, ENSMUSG00000020358, ENSMUSG00000005566, ENSMUSG00000036602, ENSMUSG00000031565, ENSMUSG00000025921, ENSMUSG00000048616, ENSMUSG00000026923, ENSMUSG00000038253, ENSMUSG00000027358,…	5884	50	13588	1.57033	0.994712	0.0224382	1.87983
GOTERM_BP_FAT	GO:0030522~intracellular receptor-mediated signaling pathway	24	0.264871	0.0010027	ENSMUSG00000033871, ENSMUSG00000033863, ENSMUSG00000024987, ENSMUSG00000033565, ENSMUSG00000030357, ENSMUSG00000039656, ENSMUSG00000021055, ENSMUSG00000001288, ENSMUSG00000024431, ENSMUSG00000018965, ENSMUSG00000036986, ENSMUSG00000071072, ENSMUSG00000071054, ENSMUSG00000029004, ENSMUSG00000015846, ENSMUSG00000005886, ENSMUSG00000031870, ENSMUSG00000002307, ENSMUSG00000023055, ENSMUSG00000026735,…	5884	32	13588	1.73199	0.995033	0.0226066	1.90208
GOTERM_BP_FAT	GO:0006091~generation of precursor metabolites and energy	139	1.53405	0.00105099	ENSMUSG00000037916, ENSMUSG00000025968, ENSMUSG00000021072, ENSMUSG00000022450, ENSMUSG00000033400, ENSMUSG00000050856, ENSMUSG00000025204, ENSMUSG00000058076, ENSMUSG00000018196, ENSMUSG00000038717, ENSMUSG00000030647, ENSMUSG00000003072, ENSMUSG00000018770, ENSMUSG00000033065, ENSMUSG00000015653, ENSMUSG00000006057, ENSMUSG00000028648, ENSMUSG00000022956, ENSMUSG00000033379, ENSMUSG00000010663,…	5884	261	13588	1.22986	0.996153	0.0235825	1.99281
GOTERM_BP_FAT	GO:0016044~membrane organization	144	1.58923	0.00116987	ENSMUSG00000039361, ENSMUSG00000020476, ENSMUSG00000020375, ENSMUSG00000021079, ENSMUSG00000029512, ENSMUSG00000015053, ENSMUSG00000015653, ENSMUSG00000027253, ENSMUSG00000029020, ENSMUSG00000022957, ENSMUSG00000041112, ENSMUSG00000024772, ENSMUSG00000027257, ENSMUSG00000005069, ENSMUSG00000040249, ENSMUSG00000042524, ENSMUSG00000075415, ENSMUSG00000006651, ENSMUSG00000028063, ENSMUSG00000037902,…	5884	272	13588	1.22258	0.99795	0.0261058	2.21585
GOTERM_BP_FAT	GO:0016079~synaptic vesicle exocytosis	15	0.165545	0.00117029	ENSMUSG00000030805, ENSMUSG00000022568, ENSMUSG00000021071, ENSMUSG00000029468, ENSMUSG00000001018, ENSMUSG00000031840, ENSMUSG00000020894, ENSMUSG00000007207, ENSMUSG00000022973, ENSMUSG00000019969, ENSMUSG00000033615, ENSMUSG00000063887, ENSMUSG00000029608, ENSMUSG00000028456, ENSMUSG00000061601	5884	17	13588	2.03763	0.997955	0.0260054	2.21664
GOTERM_BP_FAT	GO:0006261~DNA-dependent DNA replication	25	0.275908	0.0011797	ENSMUSG00000038644, ENSMUSG00000028212, ENSMUSG00000032397, ENSMUSG00000036875, ENSMUSG00000020228, ENSMUSG00000002870, ENSMUSG00000006678, ENSMUSG00000039176, ENSMUSG00000022292, ENSMUSG00000026134, ENSMUSG00000041147, ENSMUSG00000018449, ENSMUSG00000070544, ENSMUSG00000022779, ENSMUSG00000029730, ENSMUSG00000005410, ENSMUSG00000000028, ENSMUSG00000000934, ENSMUSG00000022673, ENSMUSG00000027323,…	5884	34	13588	1.69802	0.998054	0.0261022	2.23427
GOTERM_BP_FAT	GO:0006302~double-strand break repair	30	0.331089	0.00118787	ENSMUSG00000022471, ENSMUSG00000037032, ENSMUSG00000028886, ENSMUSG00000052139, ENSMUSG00000043535, ENSMUSG00000026107, ENSMUSG00000020413, ENSMUSG00000028224, ENSMUSG00000024019, ENSMUSG00000031928, ENSMUSG00000031820, ENSMUSG00000059552, ENSMUSG00000024151, ENSMUSG00000032498, ENSMUSG00000030166, ENSMUSG00000021569, ENSMUSG00000000751, ENSMUSG00000006678, ENSMUSG00000078773, ENSMUSG00000049932,…	5884	43	13588	1.61115	0.998136	0.0261712	2.24957
GOTERM_BP_FAT	GO:0008283~cell proliferation	132	1.45679	0.00118844	ENSMUSG00000046714, ENSMUSG00000050199, ENSMUSG00000046179, ENSMUSG00000000489, ENSMUSG00000022847, ENSMUSG00000027454, ENSMUSG00000078789, ENSMUSG00000052155, ENSMUSG00000025199, ENSMUSG00000040760, ENSMUSG00000029686, ENSMUSG00000048758, ENSMUSG00000044813, ENSMUSG00000024959, ENSMUSG00000031965, ENSMUSG00000025217, ENSMUSG00000030849, ENSMUSG00000002997, ENSMUSG00000022770, ENSMUSG00000027646,…	5884	247	13588	1.23413	0.998142	0.0260751	2.25065
GOTERM_BP_FAT	GO:0001825~blastocyst formation	18	0.198654	0.00126389	ENSMUSG00000030516, ENSMUSG00000027660, ENSMUSG00000032446, ENSMUSG00000015605, ENSMUSG00000004364, ENSMUSG00000029020, ENSMUSG00000000303, ENSMUSG00000037171, ENSMUSG00000027109, ENSMUSG00000021255, ENSMUSG00000024406, ENSMUSG00000030353, ENSMUSG00000039910, ENSMUSG00000067261, ENSMUSG00000052837, ENSMUSG00000017697, ENSMUSG00000020692, ENSMUSG00000029646	5884	22	13588	1.88944	0.998754	0.027594	2.39189
GOTERM_BP_FAT	GO:0043066~negative regulation of apoptosis	128	1.41265	0.0012733	ENSMUSG00000031781, ENSMUSG00000006906, ENSMUSG00000046714, ENSMUSG00000026739, ENSMUSG00000037815, ENSMUSG00000051234, ENSMUSG00000026942, ENSMUSG00000026196, ENSMUSG00000022957, ENSMUSG00000029026, ENSMUSG00000024151, ENSMUSG00000034891, ENSMUSG00000034612, ENSMUSG00000035293, ENSMUSG00000030265, ENSMUSG00000061878, ENSMUSG00000018965, ENSMUSG00000057342, ENSMUSG00000009772, ENSMUSG00000025889,…	5884	239	13588	1.23679	0.998814	0.0276825	2.4095
GOTERM_BP_FAT	GO:0006644~phospholipid metabolic process	91	1.0043	0.00137393	ENSMUSG00000023452, ENSMUSG00000036833, ENSMUSG00000029330, ENSMUSG00000050229, ENSMUSG00000032540, ENSMUSG00000026737, ENSMUSG00000031545, ENSMUSG00000027695, ENSMUSG00000019877, ENSMUSG00000038861, ENSMUSG00000038383, ENSMUSG00000005899, ENSMUSG00000017721, ENSMUSG00000038417, ENSMUSG00000021518, ENSMUSG00000021665, ENSMUSG00000030682, ENSMUSG00000024867, ENSMUSG00000032083, ENSMUSG00000013663,…	5884	163	13588	1.28925	0.999304	0.0297168	2.59755
GOTERM_BP_FAT	GO:0001837~epithelial to mesenchymal transition	13	0.143472	0.00141969	ENSMUSG00000026923, ENSMUSG00000078970, ENSMUSG00000027358, ENSMUSG00000021109, ENSMUSG00000027985, ENSMUSG00000032446, ENSMUSG00000002603, ENSMUSG00000033953, ENSMUSG00000020358, ENSMUSG00000005566, ENSMUSG00000039191, ENSMUSG00000048616, ENSMUSG00000033016	5884	14	13588	2.14436	0.999454	0.0305671	2.68296
GOTERM_BP_FAT	GO:0043069~negative regulation of programmed cell death	130	1.43472	0.00150802	ENSMUSG00000031781, ENSMUSG00000006906, ENSMUSG00000046714, ENSMUSG00000026739, ENSMUSG00000037815, ENSMUSG00000051234, ENSMUSG00000026942, ENSMUSG00000026196, ENSMUSG00000022957, ENSMUSG00000029026, ENSMUSG00000024151, ENSMUSG00000034891, ENSMUSG00000034612, ENSMUSG00000035293, ENSMUSG00000030265, ENSMUSG00000061878, ENSMUSG00000018965, ENSMUSG00000057342, ENSMUSG00000009772, ENSMUSG00000025889,…	5884	244	13588	1.23037	0.999658	0.032308	2.84762
GOTERM_BP_FAT	GO:0051493~regulation of cytoskeleton organization	59	0.651142	0.0015171	ENSMUSG00000003031, ENSMUSG00000064302, ENSMUSG00000018293, ENSMUSG00000020476, ENSMUSG00000028059, ENSMUSG00000023022, ENSMUSG00000027254, ENSMUSG00000021262, ENSMUSG00000042099, ENSMUSG00000028745, ENSMUSG00000025758, ENSMUSG00000000416, ENSMUSG00000027581, ENSMUSG00000028943, ENSMUSG00000057113, ENSMUSG00000010175, ENSMUSG00000032740, ENSMUSG00000032479, ENSMUSG00000021061, ENSMUSG00000058587,…	5884	99	13588	1.37626	0.999674	0.0323684	2.86453
GOTERM_BP_FAT	GO:0050768~negative regulation of neurogenesis	27	0.29798	0.00153668	ENSMUSG00000048482, ENSMUSG00000035187, ENSMUSG00000029634, ENSMUSG00000002603, ENSMUSG00000029516, ENSMUSG00000037815, ENSMUSG00000029512, ENSMUSG00000028664, ENSMUSG00000047139, ENSMUSG00000023391, ENSMUSG00000020458, ENSMUSG00000008999, ENSMUSG00000041309, ENSMUSG00000059552, ENSMUSG00000022607, ENSMUSG00000049556, ENSMUSG00000048616, ENSMUSG00000021796, ENSMUSG00000020716, ENSMUSG00000068327,…	5884	38	13588	1.64083	0.999706	0.0326478	2.90098
GOTERM_BP_FAT	GO:0048762~mesenchymal cell differentiation	33	0.364198	0.00153794	ENSMUSG00000078970, ENSMUSG00000025969, ENSMUSG00000024987, ENSMUSG00000046714, ENSMUSG00000021109, ENSMUSG00000002603, ENSMUSG00000027985, ENSMUSG00000032446, ENSMUSG00000030110, ENSMUSG00000022122, ENSMUSG00000033953, ENSMUSG00000020358, ENSMUSG00000005566, ENSMUSG00000036602, ENSMUSG00000031565, ENSMUSG00000025921, ENSMUSG00000048616, ENSMUSG00000026923, ENSMUSG00000027358, ENSMUSG00000030849,…	5884	49	13588	1.55525	0.999708	0.0325435	2.90332
GOTERM_BP_FAT	GO:0008156~negative regulation of DNA replication	11	0.121399	0.00153806	ENSMUSG00000032397, ENSMUSG00000041147, ENSMUSG00000029848, ENSMUSG00000021149, ENSMUSG00000074651, ENSMUSG00000006585, ENSMUSG00000006715, ENSMUSG00000026803, ENSMUSG00000042489, ENSMUSG00000059552, ENSMUSG00000020413	5884	11	13588	2.30931	0.999708	0.0324166	2.90356
GOTERM_BP_FAT	GO:0009303~rRNA transcription	11	0.121399	0.00153806	ENSMUSG00000040904, ENSMUSG00000047649, ENSMUSG00000044303, ENSMUSG00000056209, ENSMUSG00000025138, ENSMUSG00000027395, ENSMUSG00000028318, ENSMUSG00000072115, ENSMUSG00000059552, ENSMUSG00000024613, ENSMUSG00000040354	5884	11	13588	2.30931	0.999708	0.0324166	2.90356
GOTERM_BP_FAT	GO:0016477~cell migration	128	1.41265	0.00156253	ENSMUSG00000025969, ENSMUSG00000033585, ENSMUSG00000021109, ENSMUSG00000030110, ENSMUSG00000022122, ENSMUSG00000029512, ENSMUSG00000000489, ENSMUSG00000038793, ENSMUSG00000032259, ENSMUSG00000009621, ENSMUSG00000027967, ENSMUSG00000034384, ENSMUSG00000021822, ENSMUSG00000020121, ENSMUSG00000020122, ENSMUSG00000005069, ENSMUSG00000027111, ENSMUSG00000022443, ENSMUSG00000001507, ENSMUSG00000019433,…	5884	240	13588	1.23163	0.999744	0.0327934	2.94909
GOTERM_BP_FAT	GO:0046128~purine ribonucleoside metabolic process	19	0.20969	0.00164143	ENSMUSG00000018846, ENSMUSG00000019795, ENSMUSG00000022704, ENSMUSG00000002769, ENSMUSG00000020935, ENSMUSG00000053907, ENSMUSG00000021638, ENSMUSG00000033610, ENSMUSG00000021670, ENSMUSG00000021376, ENSMUSG00000039197, ENSMUSG00000001755, ENSMUSG00000037514, ENSMUSG00000042032, ENSMUSG00000006589, ENSMUSG00000029056, ENSMUSG00000063849, ENSMUSG00000017697, ENSMUSG00000002825	5884	24	13588	1.82821	0.999831	0.034286	3.0958
GOTERM_BP_FAT	GO:0042278~purine nucleoside metabolic process	19	0.20969	0.00164143	ENSMUSG00000018846, ENSMUSG00000019795, ENSMUSG00000022704, ENSMUSG00000002769, ENSMUSG00000020935, ENSMUSG00000053907, ENSMUSG00000021638, ENSMUSG00000033610, ENSMUSG00000021670, ENSMUSG00000021376, ENSMUSG00000039197, ENSMUSG00000001755, ENSMUSG00000037514, ENSMUSG00000042032, ENSMUSG00000006589, ENSMUSG00000029056, ENSMUSG00000063849, ENSMUSG00000017697, ENSMUSG00000002825	5884	24	13588	1.82821	0.999831	0.034286	3.0958
GOTERM_BP_FAT	GO:0046489~phosphoinositide biosynthetic process	23	0.253835	0.00169241	ENSMUSG00000029263, ENSMUSG00000050229, ENSMUSG00000026698, ENSMUSG00000023791, ENSMUSG00000045625, ENSMUSG00000079469, ENSMUSG00000035845, ENSMUSG00000038383, ENSMUSG00000056536, ENSMUSG00000022940, ENSMUSG00000017721, ENSMUSG00000028454, ENSMUSG00000014245, ENSMUSG00000038208, ENSMUSG00000037706, ENSMUSG00000025728, ENSMUSG00000039047, ENSMUSG00000051149, ENSMUSG00000022561, ENSMUSG00000030990,…	5884	31	13588	1.71336	0.999871	0.035194	3.19048
GOTERM_BP_FAT	GO:0001704~formation of primary germ layer	28	0.309017	0.00171244	ENSMUSG00000046714, ENSMUSG00000009073, ENSMUSG00000066839, ENSMUSG00000027985, ENSMUSG00000032446, ENSMUSG00000028341, ENSMUSG00000012396, ENSMUSG00000027198, ENSMUSG00000028649, ENSMUSG00000032402, ENSMUSG00000020612, ENSMUSG00000024406, ENSMUSG00000008999, ENSMUSG00000006445, ENSMUSG00000030699, ENSMUSG00000027002, ENSMUSG00000021796, ENSMUSG00000067336, ENSMUSG00000000125, ENSMUSG00000026497,…	5884	40	13588	1.61652	0.999884	0.0354641	3.22766
GOTERM_BP_FAT	GO:0006818~hydrogen transport	35	0.386271	0.00175301	ENSMUSG00000019302, ENSMUSG00000024403, ENSMUSG00000019210, ENSMUSG00000050856, ENSMUSG00000038690, ENSMUSG00000005553, ENSMUSG00000038717, ENSMUSG00000003072, ENSMUSG00000018770, ENSMUSG00000015575, ENSMUSG00000004285, ENSMUSG00000000563, ENSMUSG00000006057, ENSMUSG00000062683, ENSMUSG00000020261, ENSMUSG00000037994, ENSMUSG00000038023, ENSMUSG00000022956, ENSMUSG00000025428, ENSMUSG00000006273,…	5884	53	13588	1.52502	0.999907	0.0361481	3.30291
GOTERM_BP_FAT	GO:0060548~negative regulation of cell death	130	1.43472	0.00184031	ENSMUSG00000031781, ENSMUSG00000006906, ENSMUSG00000046714, ENSMUSG00000026739, ENSMUSG00000037815, ENSMUSG00000051234, ENSMUSG00000026942, ENSMUSG00000026196, ENSMUSG00000022957, ENSMUSG00000029026, ENSMUSG00000024151, ENSMUSG00000034891, ENSMUSG00000034612, ENSMUSG00000035293, ENSMUSG00000030265, ENSMUSG00000061878, ENSMUSG00000018965, ENSMUSG00000057342, ENSMUSG00000009772, ENSMUSG00000025889,…	5884	245	13588	1.22535	0.999941	0.0377685	3.46467
GOTERM_BP_FAT	GO:0032386~regulation of intracellular transport	29	0.320053	0.0018842	ENSMUSG00000004455, ENSMUSG00000044303, ENSMUSG00000028691, ENSMUSG00000026270, ENSMUSG00000028790, ENSMUSG00000002603, ENSMUSG00000028367, ENSMUSG00000026944, ENSMUSG00000043733, ENSMUSG00000026196, ENSMUSG00000021313, ENSMUSG00000019907, ENSMUSG00000037313, ENSMUSG00000028969, ENSMUSG00000020716, ENSMUSG00000031328, ENSMUSG00000026667, ENSMUSG00000022774, ENSMUSG00000001761, ENSMUSG00000025231,…	5884	42	13588	1.59453	0.999953	0.0385032	3.5459
GOTERM_BP_FAT	GO:0042127~regulation of cell proliferation	267	2.94669	0.00197898	ENSMUSG00000032397, ENSMUSG00000038518, ENSMUSG00000001517, ENSMUSG00000044562, ENSMUSG00000026637, ENSMUSG00000026398, ENSMUSG00000026739, ENSMUSG00000037568, ENSMUSG00000037815, ENSMUSG00000038793, ENSMUSG00000032259, ENSMUSG00000033373, ENSMUSG00000002799, ENSMUSG00000067847, ENSMUSG00000017724, ENSMUSG00000027318, ENSMUSG00000020122, ENSMUSG00000037169, ENSMUSG00000047945, ENSMUSG00000019579,…	5884	538	13588	1.14607	0.999972	0.0402469	3.72106
GOTERM_BP_FAT	GO:0032990~cell part morphogenesis	114	1.25814	0.00198966	ENSMUSG00000033585, ENSMUSG00000029512, ENSMUSG00000032259, ENSMUSG00000029020, ENSMUSG00000037868, ENSMUSG00000019261, ENSMUSG00000027967, ENSMUSG00000051650, ENSMUSG00000021262, ENSMUSG00000017724, ENSMUSG00000005958, ENSMUSG00000029168, ENSMUSG00000038593, ENSMUSG00000015647, ENSMUSG00000047193, ENSMUSG00000020902, ENSMUSG00000020900, ENSMUSG00000028832, ENSMUSG00000022055, ENSMUSG00000029697,…	5884	212	13588	1.2418	0.999973	0.040305	3.74078
GOTERM_BP_FAT	GO:0001558~regulation of cell growth	55	0.606997	0.00204771	ENSMUSG00000039323, ENSMUSG00000005510, ENSMUSG00000033585, ENSMUSG00000004100, ENSMUSG00000002603, ENSMUSG00000029512, ENSMUSG00000034384, ENSMUSG00000029026, ENSMUSG00000003534, ENSMUSG00000027394, ENSMUSG00000025213, ENSMUSG00000068744, ENSMUSG00000020902, ENSMUSG00000014402, ENSMUSG00000022838, ENSMUSG00000034684, ENSMUSG00000002083, ENSMUSG00000004798, ENSMUSG00000029096, ENSMUSG00000037362,…	5884	92	13588	1.38057	0.99998	0.0412996	3.84792
GOTERM_BP_FAT	GO:0045664~regulation of neuron differentiation	60	0.662179	0.00211122	ENSMUSG00000048482, ENSMUSG00000035187, ENSMUSG00000029516, ENSMUSG00000029512, ENSMUSG00000034384, ENSMUSG00000014773, ENSMUSG00000021451, ENSMUSG00000020027, ENSMUSG00000022607, ENSMUSG00000048402, ENSMUSG00000028946, ENSMUSG00000026923, ENSMUSG00000027394, ENSMUSG00000024294, ENSMUSG00000025216, ENSMUSG00000053646, ENSMUSG00000034656, ENSMUSG00000068327, ENSMUSG00000051367, ENSMUSG00000020902,…	5884	102	13588	1.35842	0.999986	0.0423928	3.96499
GOTERM_BP_FAT	GO:0009144~purine nucleoside triphosphate metabolic process	62	0.684251	0.00212191	ENSMUSG00000025968, ENSMUSG00000031441, ENSMUSG00000019210, ENSMUSG00000038690, ENSMUSG00000020788, ENSMUSG00000050856, ENSMUSG00000005553, ENSMUSG00000038717, ENSMUSG00000003072, ENSMUSG00000018770, ENSMUSG00000006057, ENSMUSG00000062683, ENSMUSG00000026576, ENSMUSG00000032087, ENSMUSG00000026575, ENSMUSG00000022956, ENSMUSG00000036622, ENSMUSG00000033379, ENSMUSG00000006567, ENSMUSG00000041329,…	5884	106	13588	1.35073	0.999987	0.042442	3.98467
GOTERM_BP_FAT	GO:0006470~protein amino acid dephosphorylation	66	0.728396	0.0021223	ENSMUSG00000013236, ENSMUSG00000027698, ENSMUSG00000033278, ENSMUSG00000004455, ENSMUSG00000028886, ENSMUSG00000040385, ENSMUSG00000003438, ENSMUSG00000034765, ENSMUSG00000034573, ENSMUSG00000032290, ENSMUSG00000028909, ENSMUSG00000043733, ENSMUSG00000028788, ENSMUSG00000046442, ENSMUSG00000038042, ENSMUSG00000049225, ENSMUSG00000013663, ENSMUSG00000025314, ENSMUSG00000030223, ENSMUSG00000027540,…	5884	114	13588	1.33697	0.999987	0.04229	3.9854
GOTERM_BP_FAT	GO:0001892~embryonic placenta development	39	0.430416	0.00212573	ENSMUSG00000021109, ENSMUSG00000020937, ENSMUSG00000032446, ENSMUSG00000027985, ENSMUSG00000031714, ENSMUSG00000029131, ENSMUSG00000034957, ENSMUSG00000015053, ENSMUSG00000001729, ENSMUSG00000045216, ENSMUSG00000025758, ENSMUSG00000032717, ENSMUSG00000020122, ENSMUSG00000056501, ENSMUSG00000027315, ENSMUSG00000023990, ENSMUSG00000053113, ENSMUSG00000022382, ENSMUSG00000022556, ENSMUSG00000015522,…	5884	61	13588	1.47645	0.999987	0.0421981	3.99172
GOTERM_BP_FAT	GO:0009968~negative regulation of signal transduction	94	1.03741	0.00216227	ENSMUSG00000053754, ENSMUSG00000020227, ENSMUSG00000004264, ENSMUSG00000020176, ENSMUSG00000018501, ENSMUSG00000046818, ENSMUSG00000030732, ENSMUSG00000032259, ENSMUSG00000027253, ENSMUSG00000002458, ENSMUSG00000029687, ENSMUSG00000020027, ENSMUSG00000027581, ENSMUSG00000032494, ENSMUSG00000002496, ENSMUSG00000036931, ENSMUSG00000059810, ENSMUSG00000027582, ENSMUSG00000048616, ENSMUSG00000013663,…	5884	171	13588	1.26945	0.999989	0.0427481	4.05898
GOTERM_BP_FAT	GO:0050678~regulation of epithelial cell proliferation	40	0.441452	0.00220605	ENSMUSG00000028413, ENSMUSG00000020170, ENSMUSG00000004264, ENSMUSG00000044303, ENSMUSG00000003031, ENSMUSG00000021055, ENSMUSG00000002603, ENSMUSG00000034708, ENSMUSG00000000561, ENSMUSG00000070691, ENSMUSG00000029563, ENSMUSG00000040681, ENSMUSG00000023951, ENSMUSG00000032402, ENSMUSG00000031870, ENSMUSG00000005871, ENSMUSG00000017724, ENSMUSG00000054252, ENSMUSG00000020122, ENSMUSG00000029754,…	5884	63	13588	1.46623	0.999992	0.0434335	4.13954
GOTERM_BP_FAT	GO:0046822~regulation of nucleocytoplasmic transport	25	0.275908	0.00221836	ENSMUSG00000004455, ENSMUSG00000044303, ENSMUSG00000028691, ENSMUSG00000028790, ENSMUSG00000002603, ENSMUSG00000028367, ENSMUSG00000043733, ENSMUSG00000026196, ENSMUSG00000019907, ENSMUSG00000037313, ENSMUSG00000028969, ENSMUSG00000020716, ENSMUSG00000031328, ENSMUSG00000026667, ENSMUSG00000022774, ENSMUSG00000001761, ENSMUSG00000025231, ENSMUSG00000034485, ENSMUSG00000005469, ENSMUSG00000027499,…	5884	35	13588	1.64951	0.999992	0.0435088	4.16217
GOTERM_BP_FAT	GO:0031399~regulation of protein modification process	91	1.0043	0.00224925	ENSMUSG00000029613, ENSMUSG00000024423, ENSMUSG00000025855, ENSMUSG00000019773, ENSMUSG00000002603, ENSMUSG00000020849, ENSMUSG00000032601, ENSMUSG00000031714, ENSMUSG00000018501, ENSMUSG00000000489, ENSMUSG00000028019, ENSMUSG00000022788, ENSMUSG00000019927, ENSMUSG00000029026, ENSMUSG00000052155, ENSMUSG00000021764, ENSMUSG00000020122, ENSMUSG00000025856, ENSMUSG00000066551, ENSMUSG00000032083,…	5884	165	13588	1.27362	0.999993	0.0439391	4.21895
GOTERM_BP_FAT	GO:0030032~lamellipodium assembly	14	0.154508	0.00225339	ENSMUSG00000027002, ENSMUSG00000032740, ENSMUSG00000066877, ENSMUSG00000020739, ENSMUSG00000030733, ENSMUSG00000028868, ENSMUSG00000009621, ENSMUSG00000029528, ENSMUSG00000030447, ENSMUSG00000021823, ENSMUSG00000022788, ENSMUSG00000028745, ENSMUSG00000032475, ENSMUSG00000022178	5884	16	13588	2.02065	0.999993	0.0438565	4.22656
GOTERM_BP_FAT	GO:0001829~trophectodermal cell differentiation	14	0.154508	0.00225339	ENSMUSG00000032446, ENSMUSG00000015605, ENSMUSG00000004364, ENSMUSG00000000303, ENSMUSG00000037171, ENSMUSG00000027109, ENSMUSG00000021255, ENSMUSG00000030353, ENSMUSG00000024406, ENSMUSG00000039910, ENSMUSG00000067261, ENSMUSG00000052837, ENSMUSG00000017697, ENSMUSG00000029646	5884	16	13588	2.02065	0.999993	0.0438565	4.22656
GOTERM_BP_FAT	GO:0007409~axonogenesis	90	0.993268	0.00227813	ENSMUSG00000003934, ENSMUSG00000048482, ENSMUSG00000033585, ENSMUSG00000061353, ENSMUSG00000017485, ENSMUSG00000029512, ENSMUSG00000031688, ENSMUSG00000028539, ENSMUSG00000024527, ENSMUSG00000032259, ENSMUSG00000050896, ENSMUSG00000037868, ENSMUSG00000043733, ENSMUSG00000022995, ENSMUSG00000027967, ENSMUSG00000043811, ENSMUSG00000051650, ENSMUSG00000021262, ENSMUSG00000017724, ENSMUSG00000022601,…	5884	163	13588	1.27508	0.999994	0.0441654	4.27201
GOTERM_BP_FAT	GO:0030518~steroid hormone receptor signaling pathway	17	0.187617	0.00228957	ENSMUSG00000033871, ENSMUSG00000033863, ENSMUSG00000033565, ENSMUSG00000030357, ENSMUSG00000021055, ENSMUSG00000024431, ENSMUSG00000018965, ENSMUSG00000071072, ENSMUSG00000071054, ENSMUSG00000031870, ENSMUSG00000005886, ENSMUSG00000002307, ENSMUSG00000023055, ENSMUSG00000025326, ENSMUSG00000007815, ENSMUSG00000032185, ENSMUSG00000037487	5884	21	13588	1.86944	0.999995	0.0442206	4.29303
GOTERM_BP_FAT	GO:0006446~regulation of translational initiation	17	0.187617	0.00228957	ENSMUSG00000020091, ENSMUSG00000021116, ENSMUSG00000016510, ENSMUSG00000031490, ENSMUSG00000024423, ENSMUSG00000036698, ENSMUSG00000046062, ENSMUSG00000045896, ENSMUSG00000022774, ENSMUSG00000028330, ENSMUSG00000005610, ENSMUSG00000010592, ENSMUSG00000020459, ENSMUSG00000037376, ENSMUSG00000052928, ENSMUSG00000053565, ENSMUSG00000024483	5884	21	13588	1.86944	0.999995	0.0442206	4.29303
GOTERM_BP_FAT	GO:0010648~negative regulation of cell communication	101	1.11467	0.00245526	ENSMUSG00000018501, ENSMUSG00000046818, ENSMUSG00000030732, ENSMUSG00000032259, ENSMUSG00000027253, ENSMUSG00000002458, ENSMUSG00000029687, ENSMUSG00000027581, ENSMUSG00000036931, ENSMUSG00000001985, ENSMUSG00000027582, ENSMUSG00000040249, ENSMUSG00000034612, ENSMUSG00000037573, ENSMUSG00000031963, ENSMUSG00000022114, ENSMUSG00000038037, ENSMUSG00000048379, ENSMUSG00000046722, ENSMUSG00000001521,…	5884	186	13588	1.25398	0.999998	0.0471757	4.59682
GOTERM_BP_FAT	GO:0007243~protein kinase cascade	125	1.37954	0.00245548	ENSMUSG00000009828, ENSMUSG00000033170, ENSMUSG00000053137, ENSMUSG00000032251, ENSMUSG00000031714, ENSMUSG00000004929, ENSMUSG00000030110, ENSMUSG00000059866, ENSMUSG00000019822, ENSMUSG00000021453, ENSMUSG00000040631, ENSMUSG00000028708, ENSMUSG00000022788, ENSMUSG00000025199, ENSMUSG00000053693, ENSMUSG00000055980, ENSMUSG00000028062, ENSMUSG00000033629, ENSMUSG00000042626, ENSMUSG00000010517,…	5884	236	13588	1.22315	0.999998	0.0470093	4.59722
GOTERM_BP_FAT	GO:0000398~nuclear mRNA splicing, via spliceosome	26	0.286944	0.00247375	ENSMUSG00000061360, ENSMUSG00000004096, ENSMUSG00000032469, ENSMUSG00000028809, ENSMUSG00000028676, ENSMUSG00000055760, ENSMUSG00000063511, ENSMUSG00000021645, ENSMUSG00000062604, ENSMUSG00000060098, ENSMUSG00000002455, ENSMUSG00000025982, ENSMUSG00000034544, ENSMUSG00000027763, ENSMUSG00000021039, ENSMUSG00000020409, ENSMUSG00000007050, ENSMUSG00000001767, ENSMUSG00000025024, ENSMUSG00000008373,…	5884	37	13588	1.62276	0.999998	0.0471806	4.63067
GOTERM_BP_FAT	GO:0000377~RNA splicing, via transesterification reactions with bulged adenosine as nucleophile	26	0.286944	0.00247375	ENSMUSG00000061360, ENSMUSG00000004096, ENSMUSG00000032469, ENSMUSG00000028809, ENSMUSG00000028676, ENSMUSG00000055760, ENSMUSG00000063511, ENSMUSG00000021645, ENSMUSG00000062604, ENSMUSG00000060098, ENSMUSG00000002455, ENSMUSG00000025982, ENSMUSG00000034544, ENSMUSG00000027763, ENSMUSG00000021039, ENSMUSG00000020409, ENSMUSG00000007050, ENSMUSG00000001767, ENSMUSG00000025024, ENSMUSG00000008373,…	5884	37	13588	1.62276	0.999998	0.0471806	4.63067
GOTERM_BP_FAT	GO:0000375~RNA splicing, via transesterification reactions	26	0.286944	0.00247375	ENSMUSG00000061360, ENSMUSG00000004096, ENSMUSG00000032469, ENSMUSG00000028809, ENSMUSG00000028676, ENSMUSG00000055760, ENSMUSG00000063511, ENSMUSG00000021645, ENSMUSG00000062604, ENSMUSG00000060098, ENSMUSG00000002455, ENSMUSG00000025982, ENSMUSG00000034544, ENSMUSG00000027763, ENSMUSG00000021039, ENSMUSG00000020409, ENSMUSG00000007050, ENSMUSG00000001767, ENSMUSG00000025024, ENSMUSG00000008373,…	5884	37	13588	1.62276	0.999998	0.0471806	4.63067
GOTERM_BP_FAT	GO:0045165~cell fate commitment	82	0.904977	0.00250269	ENSMUSG00000019428, ENSMUSG00000029275, ENSMUSG00000007613, ENSMUSG00000020170, ENSMUSG00000046714, ENSMUSG00000035187, ENSMUSG00000015619, ENSMUSG00000015053, ENSMUSG00000027967, ENSMUSG00000002799, ENSMUSG00000034384, ENSMUSG00000014773, ENSMUSG00000023391, ENSMUSG00000026735, ENSMUSG00000048904, ENSMUSG00000003436, ENSMUSG00000030353, ENSMUSG00000048402, ENSMUSG00000032187, ENSMUSG00000053129,…	5884	147	13588	1.28819	0.999998	0.0475486	4.68362
GOTERM_BP_FAT	GO:0051186~cofactor metabolic process	99	1.09259	0.00253194	ENSMUSG00000038240, ENSMUSG00000029613, ENSMUSG00000031782, ENSMUSG00000017307, ENSMUSG00000058076, ENSMUSG00000025825, ENSMUSG00000022503, ENSMUSG00000028980, ENSMUSG00000031584, ENSMUSG00000009566, ENSMUSG00000053604, ENSMUSG00000027452, ENSMUSG00000030541, ENSMUSG00000029993, ENSMUSG00000021061, ENSMUSG00000017453, ENSMUSG00000032786, ENSMUSG00000003662, ENSMUSG00000001665, ENSMUSG00000020256,…	5884	182	13588	1.25616	0.999998	0.0479197	4.73711
GOTERM_BP_FAT	GO:0048667~cell morphogenesis involved in neuron differentiation	99	1.09259	0.00253194	ENSMUSG00000033585, ENSMUSG00000029512, ENSMUSG00000032259, ENSMUSG00000037868, ENSMUSG00000027967, ENSMUSG00000021262, ENSMUSG00000051650, ENSMUSG00000017724, ENSMUSG00000005958, ENSMUSG00000029168, ENSMUSG00000038593, ENSMUSG00000020902, ENSMUSG00000028832, ENSMUSG00000020900, ENSMUSG00000022055, ENSMUSG00000029697, ENSMUSG00000004798, ENSMUSG00000033214, ENSMUSG00000023030, ENSMUSG00000029223,…	5884	182	13588	1.25616	0.999998	0.0479197	4.73711
GOTERM_BP_FAT	GO:0015992~proton transport	34	0.375235	0.00264873	ENSMUSG00000019302, ENSMUSG00000024403, ENSMUSG00000019210, ENSMUSG00000050856, ENSMUSG00000038690, ENSMUSG00000005553, ENSMUSG00000038717, ENSMUSG00000003072, ENSMUSG00000018770, ENSMUSG00000015575, ENSMUSG00000004285, ENSMUSG00000000563, ENSMUSG00000006057, ENSMUSG00000062683, ENSMUSG00000020261, ENSMUSG00000037994, ENSMUSG00000038023, ENSMUSG00000022956, ENSMUSG00000025428, ENSMUSG00000006273,…	5884	52	13588	1.50994	0.999999	0.0498984	4.95039
GOTERM_BP_FAT	GO:0030029~actin filament-based process	96	1.05949	0.00264894	ENSMUSG00000029381, ENSMUSG00000026842, ENSMUSG00000010825, ENSMUSG00000018293, ENSMUSG00000020476, ENSMUSG00000020745, ENSMUSG00000028906, ENSMUSG00000034574, ENSMUSG00000000489, ENSMUSG00000028059, ENSMUSG00000032875, ENSMUSG00000023022, ENSMUSG00000014778, ENSMUSG00000020639, ENSMUSG00000022995, ENSMUSG00000021262, ENSMUSG00000041112, ENSMUSG00000028745, ENSMUSG00000034675, ENSMUSG00000029684,…	5884	176	13588	1.25963	0.999999	0.0497254	4.95078
GOTERM_BP_FAT	GO:0009119~ribonucleoside metabolic process	27	0.29798	0.00272087	ENSMUSG00000019795, ENSMUSG00000022704, ENSMUSG00000020935, ENSMUSG00000053907, ENSMUSG00000033610, ENSMUSG00000039197, ENSMUSG00000037601, ENSMUSG00000032087, ENSMUSG00000026575, ENSMUSG00000024177, ENSMUSG00000042032, ENSMUSG00000006589, ENSMUSG00000063849, ENSMUSG00000002825, ENSMUSG00000017697, ENSMUSG00000018846, ENSMUSG00000020857, ENSMUSG00000002769, ENSMUSG00000021638, ENSMUSG00000021670,…	5884	39	13588	1.59876	0.999999	0.0508623	5.08193
GOTERM_BP_FAT	GO:0006986~response to unfolded protein	35	0.386271	0.00277893	ENSMUSG00000070348, ENSMUSG00000040482, ENSMUSG00000028343, ENSMUSG00000024387, ENSMUSG00000024807, ENSMUSG00000055401, ENSMUSG00000025408, ENSMUSG00000031668, ENSMUSG00000007039, ENSMUSG00000027230, ENSMUSG00000008429, ENSMUSG00000025757, ENSMUSG00000043241, ENSMUSG00000027808, ENSMUSG00000022365, ENSMUSG00000007036, ENSMUSG00000061207, ENSMUSG00000032575, ENSMUSG00000024371, ENSMUSG00000031770,…	5884	54	13588	1.49678	1	0.0517379	5.18765
GOTERM_BP_FAT	GO:0001890~placenta development	52	0.573888	0.00279195	ENSMUSG00000021109, ENSMUSG00000032446, ENSMUSG00000020937, ENSMUSG00000031714, ENSMUSG00000029131, ENSMUSG00000015053, ENSMUSG00000045216, ENSMUSG00000025758, ENSMUSG00000020122, ENSMUSG00000027315, ENSMUSG00000001510, ENSMUSG00000029646, ENSMUSG00000030849, ENSMUSG00000063358, ENSMUSG00000037171, ENSMUSG00000037279, ENSMUSG00000027109, ENSMUSG00000048109, ENSMUSG00000070644, ENSMUSG00000039910,…	5884	87	13588	1.38028	1	0.0517921	5.21134
GOTERM_BP_FAT	GO:0006506~GPI anchor biosynthetic process	22	0.242799	0.00282442	ENSMUSG00000029263, ENSMUSG00000050229, ENSMUSG00000026698, ENSMUSG00000023791, ENSMUSG00000045625, ENSMUSG00000079469, ENSMUSG00000035845, ENSMUSG00000038383, ENSMUSG00000056536, ENSMUSG00000022940, ENSMUSG00000017721, ENSMUSG00000028454, ENSMUSG00000014245, ENSMUSG00000038208, ENSMUSG00000025728, ENSMUSG00000039047, ENSMUSG00000051149, ENSMUSG00000022561, ENSMUSG00000030990, ENSMUSG00000078919,…	5884	30	13588	1.6935	1	0.0521965	5.2704
GOTERM_BP_FAT	GO:0000077~DNA damage checkpoint	22	0.242799	0.00282442	ENSMUSG00000032397, ENSMUSG00000032113, ENSMUSG00000070348, ENSMUSG00000052139, ENSMUSG00000019942, ENSMUSG00000020413, ENSMUSG00000034218, ENSMUSG00000028224, ENSMUSG00000049932, ENSMUSG00000036986, ENSMUSG00000043733, ENSMUSG00000024824, ENSMUSG00000053436, ENSMUSG00000032534, ENSMUSG00000031820, ENSMUSG00000032409, ENSMUSG00000059552, ENSMUSG00000042903, ENSMUSG00000035032, ENSMUSG00000030094,…	5884	30	13588	1.6935	1	0.0521965	5.2704
GOTERM_BP_FAT	GO:0009141~nucleoside triphosphate metabolic process	66	0.728396	0.00283912	ENSMUSG00000025968, ENSMUSG00000027203, ENSMUSG00000031441, ENSMUSG00000019210, ENSMUSG00000038690, ENSMUSG00000020788, ENSMUSG00000050856, ENSMUSG00000005553, ENSMUSG00000038717, ENSMUSG00000003072, ENSMUSG00000018770, ENSMUSG00000006057, ENSMUSG00000062683, ENSMUSG00000026576, ENSMUSG00000032087, ENSMUSG00000025192, ENSMUSG00000026575, ENSMUSG00000022956, ENSMUSG00000036622, ENSMUSG00000033379,…	5884	115	13588	1.32535	1	0.052279	5.29714
GOTERM_BP_FAT	GO:0032392~DNA geometric change	12	0.132436	0.00284038	ENSMUSG00000022779, ENSMUSG00000002870, ENSMUSG00000070544, ENSMUSG00000000934, ENSMUSG00000029730, ENSMUSG00000022673, ENSMUSG00000027323, ENSMUSG00000025209, ENSMUSG00000026355, ENSMUSG00000002814, ENSMUSG00000020079, ENSMUSG00000066551	5884	13	13588	2.13167	1	0.0521204	5.29943
GOTERM_BP_FAT	GO:0043086~negative regulation of catalytic activity	59	0.651142	0.00287694	ENSMUSG00000020227, ENSMUSG00000003031, ENSMUSG00000019773, ENSMUSG00000027487, ENSMUSG00000024462, ENSMUSG00000037239, ENSMUSG00000032259, ENSMUSG00000021453, ENSMUSG00000015312, ENSMUSG00000029547, ENSMUSG00000022840, ENSMUSG00000029026, ENSMUSG00000002496, ENSMUSG00000023067, ENSMUSG00000027582, ENSMUSG00000021125, ENSMUSG00000032083, ENSMUSG00000024427, ENSMUSG00000020114, ENSMUSG00000037224,…	5884	101	13588	1.349	1	0.052592	5.36586
GOTERM_BP_FAT	GO:0006119~oxidative phosphorylation	36	0.397307	0.00290102	ENSMUSG00000025968, ENSMUSG00000063882, ENSMUSG00000019302, ENSMUSG00000019210, ENSMUSG00000050856, ENSMUSG00000025204, ENSMUSG00000038717, ENSMUSG00000030647, ENSMUSG00000003072, ENSMUSG00000018770, ENSMUSG00000015575, ENSMUSG00000004285, ENSMUSG00000000563, ENSMUSG00000006057, ENSMUSG00000062683, ENSMUSG00000022956, ENSMUSG00000038023, ENSMUSG00000025428, ENSMUSG00000033793, ENSMUSG00000006273,…	5884	56	13588	1.48456	1	0.0528387	5.40961
GOTERM_BP_FAT	GO:0006163~purine nucleotide metabolic process	88	0.971195	0.0029685	ENSMUSG00000025968, ENSMUSG00000031441, ENSMUSG00000019210, ENSMUSG00000050856, ENSMUSG00000020788, ENSMUSG00000038690, ENSMUSG00000005553, ENSMUSG00000038717, ENSMUSG00000003072, ENSMUSG00000018770, ENSMUSG00000027823, ENSMUSG00000006057, ENSMUSG00000062683, ENSMUSG00000026576, ENSMUSG00000015961, ENSMUSG00000032087, ENSMUSG00000022956, ENSMUSG00000026575, ENSMUSG00000022840, ENSMUSG00000036622,…	5884	160	13588	1.27012	1	0.0538507	5.53208
GOTERM_BP_FAT	GO:0032870~cellular response to hormone stimulus	37	0.408343	0.00301499	ENSMUSG00000020091, ENSMUSG00000037112, ENSMUSG00000026791, ENSMUSG00000057177, ENSMUSG00000046714, ENSMUSG00000026270, ENSMUSG00000032253, ENSMUSG00000038485, ENSMUSG00000005534, ENSMUSG00000028698, ENSMUSG00000001729, ENSMUSG00000043733, ENSMUSG00000004056, ENSMUSG00000044167, ENSMUSG00000037622, ENSMUSG00000026457, ENSMUSG00000019970, ENSMUSG00000037643, ENSMUSG00000002108, ENSMUSG00000055980,…	5884	58	13588	1.47318	1	0.0544853	5.61636
GOTERM_BP_FAT	GO:0032869~cellular response to insulin stimulus	29	0.320053	0.00318403	ENSMUSG00000020091, ENSMUSG00000037112, ENSMUSG00000057177, ENSMUSG00000026791, ENSMUSG00000046714, ENSMUSG00000026270, ENSMUSG00000038485, ENSMUSG00000032253, ENSMUSG00000005534, ENSMUSG00000028698, ENSMUSG00000001729, ENSMUSG00000004056, ENSMUSG00000044167, ENSMUSG00000037622, ENSMUSG00000019970, ENSMUSG00000002108, ENSMUSG00000037643, ENSMUSG00000055980, ENSMUSG00000031490, ENSMUSG00000027540,…	5884	43	13588	1.55744	1	0.0572604	5.92224
GOTERM_BP_FAT	GO:0051960~regulation of nervous system development	82	0.904977	0.00320837	ENSMUSG00000048482, ENSMUSG00000035187, ENSMUSG00000029516, ENSMUSG00000002603, ENSMUSG00000037815, ENSMUSG00000029512, ENSMUSG00000032259, ENSMUSG00000034384, ENSMUSG00000014773, ENSMUSG00000023391, ENSMUSG00000021451, ENSMUSG00000020027, ENSMUSG00000022607, ENSMUSG00000048402, ENSMUSG00000048616, ENSMUSG00000028946, ENSMUSG00000026923, ENSMUSG00000027394, ENSMUSG00000027358, ENSMUSG00000024294,…	5884	148	13588	1.27948	1	0.0574908	5.9662
GOTERM_BP_FAT	GO:0042176~regulation of protein catabolic process	23	0.253835	0.00320979	ENSMUSG00000024425, ENSMUSG00000055653, ENSMUSG00000020227, ENSMUSG00000031328, ENSMUSG00000054387, ENSMUSG00000019433, ENSMUSG00000055116, ENSMUSG00000024927, ENSMUSG00000039615, ENSMUSG00000031555, ENSMUSG00000051675, ENSMUSG00000010517, ENSMUSG00000001729, ENSMUSG00000027598, ENSMUSG00000026229, ENSMUSG00000058709, ENSMUSG00000032350, ENSMUSG00000032216, ENSMUSG00000059003, ENSMUSG00000005871,…	5884	32	13588	1.65982	1	0.0573215	5.96875
GOTERM_BP_FAT	GO:0006505~GPI anchor metabolic process	23	0.253835	0.00320979	ENSMUSG00000029263, ENSMUSG00000050229, ENSMUSG00000073678, ENSMUSG00000026698, ENSMUSG00000023791, ENSMUSG00000045625, ENSMUSG00000079469, ENSMUSG00000035845, ENSMUSG00000038383, ENSMUSG00000056536, ENSMUSG00000022940, ENSMUSG00000017721, ENSMUSG00000028454, ENSMUSG00000014245, ENSMUSG00000038208, ENSMUSG00000025728, ENSMUSG00000039047, ENSMUSG00000051149, ENSMUSG00000022561, ENSMUSG00000030990,…	5884	32	13588	1.65982	1	0.0573215	5.96875
GOTERM_BP_FAT	GO:0006928~cell motion	186	2.05275	0.00322464	ENSMUSG00000025969, ENSMUSG00000033585, ENSMUSG00000021109, ENSMUSG00000030733, ENSMUSG00000030110, ENSMUSG00000029512, ENSMUSG00000022122, ENSMUSG00000000489, ENSMUSG00000038793, ENSMUSG00000028649, ENSMUSG00000032259, ENSMUSG00000037868, ENSMUSG00000009621, ENSMUSG00000027967, ENSMUSG00000051650, ENSMUSG00000034384, ENSMUSG00000021262, ENSMUSG00000021822, ENSMUSG00000041112, ENSMUSG00000017724,…	5884	367	13588	1.17039	1	0.0573861	5.99558
GOTERM_BP_FAT	GO:0006611~protein export from nucleus	10	0.110363	0.00325308	ENSMUSG00000067150, ENSMUSG00000000131, ENSMUSG00000040312, ENSMUSG00000069631, ENSMUSG00000026027, ENSMUSG00000024359, ENSMUSG00000001855, ENSMUSG00000036992, ENSMUSG00000020290, ENSMUSG00000022812	5884	10	13588	2.30931	1	0.0576842	6.04689
GOTERM_BP_FAT	GO:0009108~coenzyme biosynthetic process	40	0.441452	0.00330905	ENSMUSG00000038240, ENSMUSG00000015536, ENSMUSG00000031782, ENSMUSG00000020935, ENSMUSG00000029199, ENSMUSG00000029319, ENSMUSG00000021235, ENSMUSG00000027618, ENSMUSG00000039616, ENSMUSG00000026798, ENSMUSG00000033610, ENSMUSG00000042751, ENSMUSG00000020917, ENSMUSG00000009566, ENSMUSG00000063849, ENSMUSG00000027452, ENSMUSG00000037847, ENSMUSG00000018846, ENSMUSG00000028992, ENSMUSG00000038704,…	5884	64	13588	1.44332	1	0.0584531	6.14784
GOTERM_BP_FAT	GO:0031647~regulation of protein stability	19	0.20969	0.0034933	ENSMUSG00000027002, ENSMUSG00000044303, ENSMUSG00000031328, ENSMUSG00000034617, ENSMUSG00000037032, ENSMUSG00000021149, ENSMUSG00000019433, ENSMUSG00000001761, ENSMUSG00000039456, ENSMUSG00000026797, ENSMUSG00000002031, ENSMUSG00000022672, ENSMUSG00000029207, ENSMUSG00000021182, ENSMUSG00000011114, ENSMUSG00000076431, ENSMUSG00000031838, ENSMUSG00000042328, ENSMUSG00000013663	5884	25	13588	1.75508	1	0.0614066	6.4794
GOTERM_BP_FAT	GO:0050885~neuromuscular process controlling balance	24	0.264871	0.00358208	ENSMUSG00000018012, ENSMUSG00000031996, ENSMUSG00000034593, ENSMUSG00000025232, ENSMUSG00000022892, ENSMUSG00000032394, ENSMUSG00000020745, ENSMUSG00000034656, ENSMUSG00000028341, ENSMUSG00000040148, ENSMUSG00000074637, ENSMUSG00000031688, ENSMUSG00000028224, ENSMUSG00000020900, ENSMUSG00000025579, ENSMUSG00000022055, ENSMUSG00000074676, ENSMUSG00000030302, ENSMUSG00000024497, ENSMUSG00000021665,…	5884	34	13588	1.6301	1	0.062712	6.63877
GOTERM_BP_FAT	GO:0014031~mesenchymal cell development	31	0.342126	0.00359945	ENSMUSG00000078970, ENSMUSG00000025969, ENSMUSG00000024987, ENSMUSG00000046714, ENSMUSG00000021109, ENSMUSG00000002603, ENSMUSG00000027985, ENSMUSG00000032446, ENSMUSG00000030110, ENSMUSG00000022122, ENSMUSG00000033953, ENSMUSG00000020358, ENSMUSG00000005566, ENSMUSG00000036602, ENSMUSG00000025921, ENSMUSG00000048616, ENSMUSG00000026923, ENSMUSG00000027358, ENSMUSG00000038193, ENSMUSG00000015647,…	5884	47	13588	1.52316	1	0.0627994	6.66992
GOTERM_BP_FAT	GO:0030308~negative regulation of cell growth	31	0.342126	0.00359945	ENSMUSG00000005510, ENSMUSG00000044303, ENSMUSG00000037032, ENSMUSG00000029634, ENSMUSG00000036199, ENSMUSG00000002603, ENSMUSG00000029512, ENSMUSG00000036986, ENSMUSG00000056493, ENSMUSG00000008384, ENSMUSG00000041241, ENSMUSG00000020458, ENSMUSG00000029026, ENSMUSG00000059552, ENSMUSG00000062762, ENSMUSG00000048787, ENSMUSG00000027663, ENSMUSG00000055200, ENSMUSG00000068744, ENSMUSG00000020902,…	5884	47	13588	1.52316	1	0.0627994	6.66992
GOTERM_BP_FAT	GO:0007169~transmembrane receptor protein tyrosine kinase signaling pathway	103	1.13674	0.00365427	ENSMUSG00000032584, ENSMUSG00000033585, ENSMUSG00000046714, ENSMUSG00000031714, ENSMUSG00000030110, ENSMUSG00000032253, ENSMUSG00000028907, ENSMUSG00000027253, ENSMUSG00000040631, ENSMUSG00000029710, ENSMUSG00000023972, ENSMUSG00000020122, ENSMUSG00000027316, ENSMUSG00000029231, ENSMUSG00000055980, ENSMUSG00000005958, ENSMUSG00000030849, ENSMUSG00000005320, ENSMUSG00000027646, ENSMUSG00000038894,…	5884	192	13588	1.23885	1	0.0635173	6.76816
GOTERM_BP_FAT	GO:0009199~ribonucleoside triphosphate metabolic process	59	0.651142	0.00388629	ENSMUSG00000025968, ENSMUSG00000031441, ENSMUSG00000019210, ENSMUSG00000038690, ENSMUSG00000020788, ENSMUSG00000050856, ENSMUSG00000005553, ENSMUSG00000038717, ENSMUSG00000003072, ENSMUSG00000018770, ENSMUSG00000006057, ENSMUSG00000062683, ENSMUSG00000026576, ENSMUSG00000032087, ENSMUSG00000025192, ENSMUSG00000026575, ENSMUSG00000022956, ENSMUSG00000036622, ENSMUSG00000033379, ENSMUSG00000006567,…	5884	102	13588	1.33578	1	0.0671989	7.1829
GOTERM_BP_FAT	GO:0050680~negative regulation of epithelial cell proliferation	20	0.220726	0.00408524	ENSMUSG00000003068, ENSMUSG00000004264, ENSMUSG00000044303, ENSMUSG00000003031, ENSMUSG00000052957, ENSMUSG00000021055, ENSMUSG00000029287, ENSMUSG00000002603, ENSMUSG00000000561, ENSMUSG00000021994, ENSMUSG00000022770, ENSMUSG00000070691, ENSMUSG00000022838, ENSMUSG00000021466, ENSMUSG00000005871, ENSMUSG00000017724, ENSMUSG00000054252, ENSMUSG00000002250, ENSMUSG00000027168, ENSMUSG00000013663	5884	27	13588	1.7106	1	0.0702927	7.53713
GOTERM_BP_FAT	GO:0048812~neuron projection morphogenesis	95	1.04845	0.00418856	ENSMUSG00000003934, ENSMUSG00000048482, ENSMUSG00000033585, ENSMUSG00000029071, ENSMUSG00000061353, ENSMUSG00000017485, ENSMUSG00000029512, ENSMUSG00000031688, ENSMUSG00000028539, ENSMUSG00000024527, ENSMUSG00000032259, ENSMUSG00000050896, ENSMUSG00000037868, ENSMUSG00000043733, ENSMUSG00000019261, ENSMUSG00000022995, ENSMUSG00000027967, ENSMUSG00000043811, ENSMUSG00000051650, ENSMUSG00000021262,…	5884	176	13588	1.2465	1	0.0717758	7.72059
GOTERM_BP_FAT	GO:0001708~cell fate specification	37	0.408343	0.00454075	ENSMUSG00000019428, ENSMUSG00000020170, ENSMUSG00000020052, ENSMUSG00000037211, ENSMUSG00000025809, ENSMUSG00000035187, ENSMUSG00000001656, ENSMUSG00000074637, ENSMUSG00000031665, ENSMUSG00000073043, ENSMUSG00000027434, ENSMUSG00000031565, ENSMUSG00000030353, ENSMUSG00000041309, ENSMUSG00000038805, ENSMUSG00000048402, ENSMUSG00000038210, ENSMUSG00000040610, ENSMUSG00000026923, ENSMUSG00000030699,…	5884	59	13588	1.44821	1	0.0773348	8.34334
GOTERM_BP_FAT	GO:0032868~response to insulin stimulus	37	0.408343	0.00454075	ENSMUSG00000020091, ENSMUSG00000037112, ENSMUSG00000026791, ENSMUSG00000057177, ENSMUSG00000046714, ENSMUSG00000026270, ENSMUSG00000032253, ENSMUSG00000038485, ENSMUSG00000005534, ENSMUSG00000028698, ENSMUSG00000001729, ENSMUSG00000037868, ENSMUSG00000027882, ENSMUSG00000004056, ENSMUSG00000044167, ENSMUSG00000032737, ENSMUSG00000037622, ENSMUSG00000031808, ENSMUSG00000032485, ENSMUSG00000019970,…	5884	59	13588	1.44821	1	0.0773348	8.34334
GOTERM_BP_FAT	GO:0007568~aging	38	0.41938	0.0046551	ENSMUSG00000005370, ENSMUSG00000044303, ENSMUSG00000064796, ENSMUSG00000045875, ENSMUSG00000003814, ENSMUSG00000052056, ENSMUSG00000033307, ENSMUSG00000039176, ENSMUSG00000036986, ENSMUSG00000000282, ENSMUSG00000015476, ENSMUSG00000000093, ENSMUSG00000067847, ENSMUSG00000025408, ENSMUSG00000018604, ENSMUSG00000024174, ENSMUSG00000027808, ENSMUSG00000059552, ENSMUSG00000024151, ENSMUSG00000015474,…	5884	61	13588	1.43859	1	0.0789542	8.54468
GOTERM_BP_FAT	GO:0001944~vasculature development	130	1.43472	0.00467184	ENSMUSG00000021127, ENSMUSG00000001517, ENSMUSG00000046714, ENSMUSG00000021109, ENSMUSG00000021266, ENSMUSG00000024962, ENSMUSG00000027315, ENSMUSG00000027314, ENSMUSG00000001510, ENSMUSG00000044813, ENSMUSG00000025314, ENSMUSG00000031965, ENSMUSG00000022443, ENSMUSG00000025880, ENSMUSG00000061878, ENSMUSG00000030849, ENSMUSG00000042626, ENSMUSG00000030123, ENSMUSG00000057342, ENSMUSG00000037171,…	5884	250	13588	1.20084	1	0.0789747	8.57412
GOTERM_BP_FAT	GO:0048858~cell projection morphogenesis	107	1.18089	0.0050875	ENSMUSG00000033585, ENSMUSG00000029512, ENSMUSG00000032259, ENSMUSG00000037868, ENSMUSG00000019261, ENSMUSG00000027967, ENSMUSG00000051650, ENSMUSG00000021262, ENSMUSG00000017724, ENSMUSG00000005958, ENSMUSG00000029168, ENSMUSG00000038593, ENSMUSG00000015647, ENSMUSG00000047193, ENSMUSG00000020902, ENSMUSG00000020900, ENSMUSG00000028832, ENSMUSG00000022055, ENSMUSG00000029697, ENSMUSG00000033214,…	5884	202	13588	1.22325	1	0.0854372	9.30223
GOTERM_BP_FAT	GO:0048863~stem cell differentiation	22	0.242799	0.00520163	ENSMUSG00000021796, ENSMUSG00000064796, ENSMUSG00000003032, ENSMUSG00000012396, ENSMUSG00000074637, ENSMUSG00000026605, ENSMUSG00000055799, ENSMUSG00000037171, ENSMUSG00000031540, ENSMUSG00000028736, ENSMUSG00000022521, ENSMUSG00000050917, ENSMUSG00000021255, ENSMUSG00000005871, ENSMUSG00000017724, ENSMUSG00000024406, ENSMUSG00000050966, ENSMUSG00000041359, ENSMUSG00000036202, ENSMUSG00000034610,…	5884	31	13588	1.63887	1	0.0869974	9.50119
GOTERM_BP_FAT	GO:0009205~purine ribonucleoside triphosphate metabolic process	58	0.640106	0.00521356	ENSMUSG00000025968, ENSMUSG00000031441, ENSMUSG00000019210, ENSMUSG00000038690, ENSMUSG00000020788, ENSMUSG00000050856, ENSMUSG00000005553, ENSMUSG00000038717, ENSMUSG00000003072, ENSMUSG00000018770, ENSMUSG00000006057, ENSMUSG00000062683, ENSMUSG00000026576, ENSMUSG00000032087, ENSMUSG00000026575, ENSMUSG00000022956, ENSMUSG00000036622, ENSMUSG00000033379, ENSMUSG00000006567, ENSMUSG00000041329,…	5884	101	13588	1.32614	1	0.0869144	9.52196
GOTERM_BP_FAT	GO:0009142~nucleoside triphosphate biosynthetic process	55	0.606997	0.00527599	ENSMUSG00000031441, ENSMUSG00000019210, ENSMUSG00000038690, ENSMUSG00000020788, ENSMUSG00000050856, ENSMUSG00000005553, ENSMUSG00000038717, ENSMUSG00000003072, ENSMUSG00000018770, ENSMUSG00000006057, ENSMUSG00000062683, ENSMUSG00000026576, ENSMUSG00000032087, ENSMUSG00000026575, ENSMUSG00000022956, ENSMUSG00000036622, ENSMUSG00000033379, ENSMUSG00000006567, ENSMUSG00000041329, ENSMUSG00000071359,…	5884	95	13588	1.33697	1	0.0876356	9.6306
GOTERM_BP_FAT	GO:0048754~branching morphogenesis of a tube	54	0.595961	0.00528912	ENSMUSG00000004264, ENSMUSG00000046714, ENSMUSG00000040385, ENSMUSG00000061353, ENSMUSG00000002603, ENSMUSG00000018604, ENSMUSG00000031870, ENSMUSG00000017724, ENSMUSG00000025921, ENSMUSG00000029648, ENSMUSG00000037169, ENSMUSG00000003534, ENSMUSG00000048402, ENSMUSG00000026923, ENSMUSG00000031965, ENSMUSG00000027358, ENSMUSG00000025217, ENSMUSG00000015647, ENSMUSG00000051367, ENSMUSG00000034486,…	5884	93	13588	1.34089	1	0.0875701	9.65342
GOTERM_BP_FAT	GO:0044087~regulation of cellular component biogenesis	52	0.573888	0.00530205	ENSMUSG00000030213, ENSMUSG00000007613, ENSMUSG00000003031, ENSMUSG00000018293, ENSMUSG00000020476, ENSMUSG00000021262, ENSMUSG00000042099, ENSMUSG00000028745, ENSMUSG00000000416, ENSMUSG00000022607, ENSMUSG00000013663, ENSMUSG00000010175, ENSMUSG00000021061, ENSMUSG00000020114, ENSMUSG00000058587, ENSMUSG00000068744, ENSMUSG00000030707, ENSMUSG00000022770, ENSMUSG00000015605, ENSMUSG00000002031,…	5884	89	13588	1.34926	1	0.0875021	9.6759
GOTERM_BP_FAT	GO:0021510~spinal cord development	30	0.331089	0.00542278	ENSMUSG00000036376, ENSMUSG00000020052, ENSMUSG00000035187, ENSMUSG00000038718, ENSMUSG00000004768, ENSMUSG00000029546, ENSMUSG00000027434, ENSMUSG00000020037, ENSMUSG00000041309, ENSMUSG00000029005, ENSMUSG00000048402, ENSMUSG00000053129, ENSMUSG00000020716, ENSMUSG00000024831, ENSMUSG00000038593, ENSMUSG00000022484, ENSMUSG00000025216, ENSMUSG00000053398, ENSMUSG00000034656, ENSMUSG00000041730,…	5884	46	13588	1.50607	1	0.089131	9.88554
GOTERM_BP_FAT	GO:0019318~hexose metabolic process	91	1.0043	0.00555289	ENSMUSG00000032295, ENSMUSG00000032294, ENSMUSG00000062646, ENSMUSG00000004455, ENSMUSG00000032114, ENSMUSG00000033400, ENSMUSG00000048583, ENSMUSG00000028673, ENSMUSG00000022490, ENSMUSG00000040385, ENSMUSG00000028671, ENSMUSG00000027207, ENSMUSG00000025791, ENSMUSG00000026773, ENSMUSG00000036073, ENSMUSG00000035473, ENSMUSG00000004267, ENSMUSG00000033065, ENSMUSG00000028980, ENSMUSG00000020260,…	5884	169	13588	1.24348	1	0.0908935	10.1109
GOTERM_BP_FAT	GO:0043968~histone H2A acetylation	11	0.121399	0.005619	ENSMUSG00000029670, ENSMUSG00000003868, ENSMUSG00000003778, ENSMUSG00000020171, ENSMUSG00000062270, ENSMUSG00000029505, ENSMUSG00000027671, ENSMUSG00000009640, ENSMUSG00000045482, ENSMUSG00000028863, ENSMUSG00000030079	5884	12	13588	2.11687	1	0.0916446	10.2253
GOTERM_BP_FAT	GO:0007030~Golgi organization	11	0.121399	0.005619	ENSMUSG00000024759, ENSMUSG00000039703, ENSMUSG00000026577, ENSMUSG00000031979, ENSMUSG00000062797, ENSMUSG00000014959, ENSMUSG00000037373, ENSMUSG00000032513, ENSMUSG00000021192, ENSMUSG00000031788, ENSMUSG00000059811	5884	12	13588	2.11687	1	0.0916446	10.2253
GOTERM_BP_FAT	GO:0032508~DNA duplex unwinding	11	0.121399	0.005619	ENSMUSG00000022779, ENSMUSG00000002870, ENSMUSG00000070544, ENSMUSG00000000934, ENSMUSG00000029730, ENSMUSG00000022673, ENSMUSG00000027323, ENSMUSG00000025209, ENSMUSG00000026355, ENSMUSG00000002814, ENSMUSG00000020079	5884	12	13588	2.11687	1	0.0916446	10.2253
GOTERM_BP_FAT	GO:0044092~negative regulation of molecular function	73	0.805651	0.0058546	ENSMUSG00000020227, ENSMUSG00000003031, ENSMUSG00000019773, ENSMUSG00000027487, ENSMUSG00000024462, ENSMUSG00000037239, ENSMUSG00000032259, ENSMUSG00000021453, ENSMUSG00000015312, ENSMUSG00000029547, ENSMUSG00000025408, ENSMUSG00000022840, ENSMUSG00000029026, ENSMUSG00000002496, ENSMUSG00000036931, ENSMUSG00000023067, ENSMUSG00000027582, ENSMUSG00000021125, ENSMUSG00000032083, ENSMUSG00000024427,…	5884	132	13588	1.27712	1	0.0950175	10.6316
GOTERM_BP_FAT	GO:0048193~Golgi vesicle transport	33	0.364198	0.00606785	ENSMUSG00000049299, ENSMUSG00000032112, ENSMUSG00000020149, ENSMUSG00000007777, ENSMUSG00000034602, ENSMUSG00000039367, ENSMUSG00000021248, ENSMUSG00000015013, ENSMUSG00000036391, ENSMUSG00000030298, ENSMUSG00000015653, ENSMUSG00000035933, ENSMUSG00000055681, ENSMUSG00000041891, ENSMUSG00000026577, ENSMUSG00000024941, ENSMUSG00000001576, ENSMUSG00000037643, ENSMUSG00000029148, ENSMUSG00000034893,…	5884	52	13588	1.46553	1	0.0980134	10.9978
GOTERM_BP_FAT	GO:0048666~neuron development	149	1.64441	0.00609312	ENSMUSG00000033585, ENSMUSG00000024565, ENSMUSG00000038718, ENSMUSG00000029516, ENSMUSG00000026255, ENSMUSG00000030110, ENSMUSG00000029512, ENSMUSG00000032259, ENSMUSG00000019261, ENSMUSG00000037868, ENSMUSG00000038417, ENSMUSG00000027967, ENSMUSG00000051650, ENSMUSG00000021262, ENSMUSG00000029026, ENSMUSG00000017724, ENSMUSG00000027581, ENSMUSG00000056579, ENSMUSG00000025380, ENSMUSG00000019971,…	5884	292	13588	1.17838	1	0.0981035	11.0411
GOTERM_BP_FAT	GO:0006338~chromatin remodeling	24	0.264871	0.00619588	ENSMUSG00000053754, ENSMUSG00000002748, ENSMUSG00000028693, ENSMUSG00000062270, ENSMUSG00000029279, ENSMUSG00000054191, ENSMUSG00000027671, ENSMUSG00000031715, ENSMUSG00000028089, ENSMUSG00000046791, ENSMUSG00000024947, ENSMUSG00000040481, ENSMUSG00000057236, ENSMUSG00000039852, ENSMUSG00000018509, ENSMUSG00000020232, ENSMUSG00000038331, ENSMUSG00000034154, ENSMUSG00000026646, ENSMUSG00000026803,…	5884	35	13588	1.58353	1	0.0993765	11.217
GOTERM_BP_FAT	GO:0019637~organophosphate metabolic process	94	1.03741	0.00648424	ENSMUSG00000023452, ENSMUSG00000036833, ENSMUSG00000029330, ENSMUSG00000050229, ENSMUSG00000032540, ENSMUSG00000026737, ENSMUSG00000031545, ENSMUSG00000027695, ENSMUSG00000019877, ENSMUSG00000038861, ENSMUSG00000038383, ENSMUSG00000005899, ENSMUSG00000017721, ENSMUSG00000038417, ENSMUSG00000021518, ENSMUSG00000021665, ENSMUSG00000030682, ENSMUSG00000024867, ENSMUSG00000032083, ENSMUSG00000013663,…	5884	176	13588	1.23338	1	0.103456	11.7089
GOTERM_BP_FAT	GO:0048732~gland development	104	1.14778	0.00654018	ENSMUSG00000027381, ENSMUSG00000022843, ENSMUSG00000000489, ENSMUSG00000015053, ENSMUSG00000032259, ENSMUSG00000031870, ENSMUSG00000017724, ENSMUSG00000020122, ENSMUSG00000025199, ENSMUSG00000053129, ENSMUSG00000055980, ENSMUSG00000048763, ENSMUSG00000020484, ENSMUSG00000025217, ENSMUSG00000015647, ENSMUSG00000030849, ENSMUSG00000030123, ENSMUSG00000020902, ENSMUSG00000027646, ENSMUSG00000038894,…	5884	197	13588	1.21913	1	0.10399	11.804
GOTERM_BP_FAT	GO:0051052~regulation of DNA metabolic process	36	0.397307	0.00654501	ENSMUSG00000032397, ENSMUSG00000024425, ENSMUSG00000029920, ENSMUSG00000005370, ENSMUSG00000064796, ENSMUSG00000037032, ENSMUSG00000030254, ENSMUSG00000021149, ENSMUSG00000028886, ENSMUSG00000007872, ENSMUSG00000052139, ENSMUSG00000042489, ENSMUSG00000002603, ENSMUSG00000020413, ENSMUSG00000030528, ENSMUSG00000027342, ENSMUSG00000024019, ENSMUSG00000006715, ENSMUSG00000006585, ENSMUSG00000074651,…	5884	58	13588	1.43337	1	0.103752	11.8122
GOTERM_BP_FAT	GO:0015986~ATP synthesis coupled proton transport	25	0.275908	0.00664165	ENSMUSG00000019302, ENSMUSG00000019210, ENSMUSG00000050856, ENSMUSG00000038717, ENSMUSG00000003072, ENSMUSG00000018770, ENSMUSG00000015575, ENSMUSG00000004285, ENSMUSG00000006057, ENSMUSG00000000563, ENSMUSG00000062683, ENSMUSG00000038023, ENSMUSG00000022956, ENSMUSG00000025428, ENSMUSG00000006273, ENSMUSG00000033793, ENSMUSG00000033379, ENSMUSG00000052459, ENSMUSG00000022890, ENSMUSG00000013160,…	5884	37	13588	1.56035	1	0.104893	11.9763
GOTERM_BP_FAT	GO:0015985~energy coupled proton transport, down electrochemical gradient	25	0.275908	0.00664165	ENSMUSG00000019302, ENSMUSG00000019210, ENSMUSG00000050856, ENSMUSG00000038717, ENSMUSG00000003072, ENSMUSG00000018770, ENSMUSG00000015575, ENSMUSG00000004285, ENSMUSG00000006057, ENSMUSG00000000563, ENSMUSG00000062683, ENSMUSG00000038023, ENSMUSG00000022956, ENSMUSG00000025428, ENSMUSG00000006273, ENSMUSG00000033793, ENSMUSG00000033379, ENSMUSG00000052459, ENSMUSG00000022890, ENSMUSG00000013160,…	5884	37	13588	1.56035	1	0.104893	11.9763
GOTERM_BP_FAT	GO:0000184~nuclear-transcribed mRNA catabolic process, nonsense-mediated decay	19	0.20969	0.0067779	ENSMUSG00000042772, ENSMUSG00000041477, ENSMUSG00000020495, ENSMUSG00000025580, ENSMUSG00000064030, ENSMUSG00000022774, ENSMUSG00000030655, ENSMUSG00000028675, ENSMUSG00000028330, ENSMUSG00000034681, ENSMUSG00000058301, ENSMUSG00000022685, ENSMUSG00000005682, ENSMUSG00000038290, ENSMUSG00000029647, ENSMUSG00000052928, ENSMUSG00000078676, ENSMUSG00000001415, ENSMUSG00000024472	5884	26	13588	1.68758	1	0.106616	12.2071
GOTERM_BP_FAT	GO:0001947~heart looping	19	0.20969	0.0067779	ENSMUSG00000031965, ENSMUSG00000024294, ENSMUSG00000025216, ENSMUSG00000021109, ENSMUSG00000038193, ENSMUSG00000025231, ENSMUSG00000026124, ENSMUSG00000015605, ENSMUSG00000028718, ENSMUSG00000067860, ENSMUSG00000018604, ENSMUSG00000037171, ENSMUSG00000032402, ENSMUSG00000037279, ENSMUSG00000019969, ENSMUSG00000050953, ENSMUSG00000021944, ENSMUSG00000047248, ENSMUSG00000017858	5884	26	13588	1.68758	1	0.106616	12.2071
GOTERM_BP_FAT	GO:0006998~nuclear envelope organization	9	0.0993268	0.00682036	ENSMUSG00000042524, ENSMUSG00000028063, ENSMUSG00000020745, ENSMUSG00000036817, ENSMUSG00000018736, ENSMUSG00000027284, ENSMUSG00000063450, ENSMUSG00000018559, ENSMUSG00000043207	5884	9	13588	2.30931	1	0.106932	12.2789
GOTERM_BP_FAT	GO:0045736~negative regulation of cyclin-dependent protein kinase activity	9	0.0993268	0.00682036	ENSMUSG00000031628, ENSMUSG00000044303, ENSMUSG00000003031, ENSMUSG00000021959, ENSMUSG00000005871, ENSMUSG00000023067, ENSMUSG00000048878, ENSMUSG00000040021, ENSMUSG00000027487	5884	9	13588	2.30931	1	0.106932	12.2789
GOTERM_BP_FAT	GO:0010256~endomembrane organization	9	0.0993268	0.00682036	ENSMUSG00000042524, ENSMUSG00000028063, ENSMUSG00000020745, ENSMUSG00000036817, ENSMUSG00000018736, ENSMUSG00000027284, ENSMUSG00000063450, ENSMUSG00000018559, ENSMUSG00000043207	5884	9	13588	2.30931	1	0.106932	12.2789
GOTERM_BP_FAT	GO:0007411~axon guidance	56	0.618033	0.0069963	ENSMUSG00000003934, ENSMUSG00000048482, ENSMUSG00000061353, ENSMUSG00000031688, ENSMUSG00000028539, ENSMUSG00000037868, ENSMUSG00000022995, ENSMUSG00000027967, ENSMUSG00000021262, ENSMUSG00000051650, ENSMUSG00000017724, ENSMUSG00000022601, ENSMUSG00000048895, ENSMUSG00000000247, ENSMUSG00000048402, ENSMUSG00000029168, ENSMUSG00000005958, ENSMUSG00000034486, ENSMUSG00000041730, ENSMUSG00000020902,…	5884	98	13588	1.31961	1	0.109221	12.5759
GOTERM_BP_FAT	GO:0009145~purine nucleoside triphosphate biosynthetic process	54	0.595961	0.00708245	ENSMUSG00000031441, ENSMUSG00000019210, ENSMUSG00000038690, ENSMUSG00000020788, ENSMUSG00000050856, ENSMUSG00000005553, ENSMUSG00000038717, ENSMUSG00000003072, ENSMUSG00000018770, ENSMUSG00000006057, ENSMUSG00000062683, ENSMUSG00000026576, ENSMUSG00000032087, ENSMUSG00000026575, ENSMUSG00000022956, ENSMUSG00000036622, ENSMUSG00000033379, ENSMUSG00000006567, ENSMUSG00000041329, ENSMUSG00000029467,…	5884	94	13588	1.32663	1	0.11017	12.721
GOTERM_BP_FAT	GO:0040029~regulation of gene expression, epigenetic	42	0.463525	0.00708528	ENSMUSG00000004099, ENSMUSG00000002028, ENSMUSG00000030213, ENSMUSG00000001424, ENSMUSG00000035478, ENSMUSG00000027018, ENSMUSG00000031715, ENSMUSG00000028842, ENSMUSG00000025578, ENSMUSG00000017146, ENSMUSG00000052707, ENSMUSG00000024054, ENSMUSG00000029004, ENSMUSG00000035576, ENSMUSG00000060098, ENSMUSG00000040054, ENSMUSG00000029524, ENSMUSG00000002227, ENSMUSG00000025486, ENSMUSG00000050966,…	5884	70	13588	1.38559	1	0.10989	12.7257
GOTERM_BP_FAT	GO:0021537~telencephalon development	43	0.474561	0.00713138	ENSMUSG00000029478, ENSMUSG00000020052, ENSMUSG00000024565, ENSMUSG00000020745, ENSMUSG00000027985, ENSMUSG00000020918, ENSMUSG00000020849, ENSMUSG00000019777, ENSMUSG00000074637, ENSMUSG00000029563, ENSMUSG00000032259, ENSMUSG00000028800, ENSMUSG00000019803, ENSMUSG00000028519, ENSMUSG00000020283, ENSMUSG00000023391, ENSMUSG00000029026, ENSMUSG00000020122, ENSMUSG00000038805, ENSMUSG00000037313,…	5884	72	13588	1.37917	1	0.110244	12.8033
GOTERM_BP_FAT	GO:0046034~ATP metabolic process	52	0.573888	0.00715033	ENSMUSG00000025968, ENSMUSG00000031441, ENSMUSG00000019210, ENSMUSG00000038690, ENSMUSG00000020788, ENSMUSG00000050856, ENSMUSG00000005553, ENSMUSG00000038717, ENSMUSG00000003072, ENSMUSG00000018770, ENSMUSG00000006057, ENSMUSG00000062683, ENSMUSG00000026576, ENSMUSG00000022956, ENSMUSG00000036622, ENSMUSG00000033379, ENSMUSG00000006567, ENSMUSG00000041329, ENSMUSG00000029467, ENSMUSG00000052459,…	5884	90	13588	1.33427	1	0.110201	12.8351
GOTERM_BP_FAT	GO:0001568~blood vessel development	126	1.39057	0.00716582	ENSMUSG00000021127, ENSMUSG00000001517, ENSMUSG00000046714, ENSMUSG00000021109, ENSMUSG00000021266, ENSMUSG00000024962, ENSMUSG00000027315, ENSMUSG00000027314, ENSMUSG00000001510, ENSMUSG00000044813, ENSMUSG00000025314, ENSMUSG00000031965, ENSMUSG00000022443, ENSMUSG00000025880, ENSMUSG00000061878, ENSMUSG00000030849, ENSMUSG00000042626, ENSMUSG00000030123, ENSMUSG00000057342, ENSMUSG00000037279,…	5884	244	13588	1.19251	1	0.110107	12.8612
GOTERM_BP_FAT	GO:0003007~heart morphogenesis	44	0.485598	0.00716696	ENSMUSG00000029478, ENSMUSG00000046714, ENSMUSG00000021109, ENSMUSG00000026124, ENSMUSG00000031523, ENSMUSG00000025579, ENSMUSG00000021669, ENSMUSG00000067860, ENSMUSG00000000093, ENSMUSG00000015846, ENSMUSG00000032402, ENSMUSG00000018604, ENSMUSG00000032366, ENSMUSG00000021944, ENSMUSG00000032187, ENSMUSG00000010175, ENSMUSG00000021796, ENSMUSG00000031965, ENSMUSG00000007817, ENSMUSG00000024294,…	5884	74	13588	1.37311	1	0.109806	12.8631
GOTERM_BP_FAT	GO:0001889~liver development	28	0.309017	0.00777136	ENSMUSG00000038518, ENSMUSG00000001517, ENSMUSG00000043866, ENSMUSG00000001247, ENSMUSG00000024927, ENSMUSG00000026124, ENSMUSG00000022528, ENSMUSG00000025907, ENSMUSG00000034957, ENSMUSG00000032402, ENSMUSG00000044147, ENSMUSG00000025533, ENSMUSG00000024986, ENSMUSG00000017697, ENSMUSG00000026923, ENSMUSG00000010175, ENSMUSG00000020716, ENSMUSG00000039377, ENSMUSG00000054191, ENSMUSG00000029287,…	5884	43	13588	1.50374	1	0.11819	13.8729
GOTERM_BP_FAT	GO:0007368~determination of left/right symmetry	28	0.309017	0.00777136	ENSMUSG00000033837, ENSMUSG00000047407, ENSMUSG00000040929, ENSMUSG00000026124, ENSMUSG00000067860, ENSMUSG00000049691, ENSMUSG00000014773, ENSMUSG00000055932, ENSMUSG00000052155, ENSMUSG00000022911, ENSMUSG00000026923, ENSMUSG00000030513, ENSMUSG00000061393, ENSMUSG00000034462, ENSMUSG00000001761, ENSMUSG00000047193, ENSMUSG00000025231, ENSMUSG00000033282, ENSMUSG00000028718, ENSMUSG00000036632,…	5884	43	13588	1.50374	1	0.11819	13.8729
GOTERM_BP_FAT	GO:0043244~regulation of protein complex disassembly	28	0.309017	0.00777136	ENSMUSG00000015222, ENSMUSG00000020227, ENSMUSG00000064302, ENSMUSG00000020476, ENSMUSG00000028059, ENSMUSG00000038775, ENSMUSG00000018411, ENSMUSG00000058301, ENSMUSG00000023022, ENSMUSG00000033392, ENSMUSG00000027254, ENSMUSG00000021262, ENSMUSG00000050192, ENSMUSG00000057738, ENSMUSG00000052727, ENSMUSG00000028745, ENSMUSG00000005871, ENSMUSG00000020315, ENSMUSG00000021061, ENSMUSG00000032479,…	5884	43	13588	1.50374	1	0.11819	13.8729
GOTERM_BP_FAT	GO:0034654~nucleobase, nucleoside, nucleotide and nucleic acid biosynthetic process	95	1.04845	0.00777895	ENSMUSG00000022704, ENSMUSG00000031441, ENSMUSG00000019210, ENSMUSG00000050856, ENSMUSG00000020788, ENSMUSG00000038690, ENSMUSG00000005553, ENSMUSG00000038717, ENSMUSG00000003072, ENSMUSG00000018770, ENSMUSG00000042751, ENSMUSG00000027823, ENSMUSG00000006057, ENSMUSG00000062683, ENSMUSG00000026576, ENSMUSG00000015961, ENSMUSG00000032087, ENSMUSG00000022956, ENSMUSG00000026575, ENSMUSG00000022840,…	5884	179	13588	1.22561	1	0.117961	13.8855
GOTERM_BP_FAT	GO:0034404~nucleobase, nucleoside and nucleotide biosynthetic process	95	1.04845	0.00777895	ENSMUSG00000022704, ENSMUSG00000031441, ENSMUSG00000019210, ENSMUSG00000050856, ENSMUSG00000020788, ENSMUSG00000038690, ENSMUSG00000005553, ENSMUSG00000038717, ENSMUSG00000003072, ENSMUSG00000018770, ENSMUSG00000042751, ENSMUSG00000027823, ENSMUSG00000006057, ENSMUSG00000062683, ENSMUSG00000026576, ENSMUSG00000015961, ENSMUSG00000032087, ENSMUSG00000022956, ENSMUSG00000026575, ENSMUSG00000022840,…	5884	179	13588	1.22561	1	0.117961	13.8855
GOTERM_BP_FAT	GO:0001763~morphogenesis of a branching structure	69	0.761505	0.00786648	ENSMUSG00000004264, ENSMUSG00000020170, ENSMUSG00000046714, ENSMUSG00000040385, ENSMUSG00000061353, ENSMUSG00000002603, ENSMUSG00000031548, ENSMUSG00000000489, ENSMUSG00000032259, ENSMUSG00000018604, ENSMUSG00000031870, ENSMUSG00000023391, ENSMUSG00000017724, ENSMUSG00000029648, ENSMUSG00000025921, ENSMUSG00000032494, ENSMUSG00000037169, ENSMUSG00000027315, ENSMUSG00000003534, ENSMUSG00000048402,…	5884	125	13588	1.27474	1	0.118872	14.0308
GOTERM_BP_FAT	GO:0045732~positive regulation of protein catabolic process	12	0.132436	0.00804959	ENSMUSG00000024425, ENSMUSG00000001729, ENSMUSG00000027598, ENSMUSG00000055653, ENSMUSG00000032350, ENSMUSG00000058709, ENSMUSG00000032216, ENSMUSG00000005871, ENSMUSG00000039615, ENSMUSG00000031555, ENSMUSG00000051675, ENSMUSG00000042303	5884	14	13588	1.97941	1	0.121131	14.3341
GOTERM_BP_FAT	GO:0043161~proteasomal ubiquitin-dependent protein catabolic process	21	0.231762	0.00832165	ENSMUSG00000039703, ENSMUSG00000041556, ENSMUSG00000016552, ENSMUSG00000028426, ENSMUSG00000040462, ENSMUSG00000030104, ENSMUSG00000003813, ENSMUSG00000039615, ENSMUSG00000031751, ENSMUSG00000071533, ENSMUSG00000004364, ENSMUSG00000006676, ENSMUSG00000055401, ENSMUSG00000009293, ENSMUSG00000043019, ENSMUSG00000036646, ENSMUSG00000078578, ENSMUSG00000020708, ENSMUSG00000017843, ENSMUSG00000020048,…	5884	30	13588	1.61652	1	0.124622	14.7827
GOTERM_BP_FAT	GO:0010498~proteasomal protein catabolic process	21	0.231762	0.00832165	ENSMUSG00000039703, ENSMUSG00000041556, ENSMUSG00000016552, ENSMUSG00000028426, ENSMUSG00000040462, ENSMUSG00000030104, ENSMUSG00000003813, ENSMUSG00000039615, ENSMUSG00000031751, ENSMUSG00000071533, ENSMUSG00000004364, ENSMUSG00000006676, ENSMUSG00000055401, ENSMUSG00000009293, ENSMUSG00000043019, ENSMUSG00000036646, ENSMUSG00000078578, ENSMUSG00000020708, ENSMUSG00000017843, ENSMUSG00000020048,…	5884	30	13588	1.61652	1	0.124622	14.7827
GOTERM_BP_FAT	GO:0051329~interphase of mitotic cell cycle	31	0.342126	0.00860969	ENSMUSG00000027552, ENSMUSG00000032113, ENSMUSG00000079356, ENSMUSG00000043866, ENSMUSG00000070348, ENSMUSG00000022369, ENSMUSG00000025809, ENSMUSG00000042557, ENSMUSG00000038482, ENSMUSG00000054115, ENSMUSG00000036390, ENSMUSG00000024791, ENSMUSG00000057897, ENSMUSG00000053819, ENSMUSG00000022892, ENSMUSG00000000296, ENSMUSG00000028161, ENSMUSG00000052525, ENSMUSG00000006678, ENSMUSG00000040021,…	5884	49	13588	1.46099	1	0.128302	15.2553
GOTERM_BP_FAT	GO:0031396~regulation of protein ubiquitination	16	0.176581	0.00861334	ENSMUSG00000041556, ENSMUSG00000044303, ENSMUSG00000021149, ENSMUSG00000019773, ENSMUSG00000039615, ENSMUSG00000037075, ENSMUSG00000074781, ENSMUSG00000038160, ENSMUSG00000028191, ENSMUSG00000032350, ENSMUSG00000043683, ENSMUSG00000019927, ENSMUSG00000039686, ENSMUSG00000054252, ENSMUSG00000005312, ENSMUSG00000028969	5884	21	13588	1.75948	1	0.127995	15.2613
GOTERM_BP_FAT	GO:0051325~interphase	32	0.353162	0.00883098	ENSMUSG00000027552, ENSMUSG00000032113, ENSMUSG00000079356, ENSMUSG00000043866, ENSMUSG00000070348, ENSMUSG00000022369, ENSMUSG00000025809, ENSMUSG00000042557, ENSMUSG00000038482, ENSMUSG00000054115, ENSMUSG00000036390, ENSMUSG00000024791, ENSMUSG00000057897, ENSMUSG00000053819, ENSMUSG00000022892, ENSMUSG00000000296, ENSMUSG00000028161, ENSMUSG00000052525, ENSMUSG00000006678, ENSMUSG00000040021,…	5884	51	13588	1.44898	1	0.130656	15.6167
GOTERM_BP_FAT	GO:0008285~negative regulation of cell proliferation	116	1.28021	0.0088371	ENSMUSG00000038518, ENSMUSG00000029613, ENSMUSG00000037815, ENSMUSG00000038793, ENSMUSG00000033373, ENSMUSG00000032259, ENSMUSG00000029020, ENSMUSG00000017724, ENSMUSG00000001707, ENSMUSG00000003068, ENSMUSG00000025216, ENSMUSG00000000142, ENSMUSG00000022114, ENSMUSG00000022770, ENSMUSG00000022838, ENSMUSG00000027598, ENSMUSG00000037279, ENSMUSG00000021504, ENSMUSG00000027878, ENSMUSG00000044820,…	5884	224	13588	1.19589	1	0.130379	15.6266
GOTERM_BP_FAT	GO:0030036~actin cytoskeleton organization	88	0.971195	0.00887977	ENSMUSG00000029381, ENSMUSG00000026842, ENSMUSG00000010825, ENSMUSG00000018293, ENSMUSG00000020476, ENSMUSG00000020745, ENSMUSG00000028906, ENSMUSG00000034574, ENSMUSG00000000489, ENSMUSG00000028059, ENSMUSG00000032875, ENSMUSG00000023022, ENSMUSG00000014778, ENSMUSG00000020639, ENSMUSG00000022995, ENSMUSG00000021262, ENSMUSG00000041112, ENSMUSG00000028745, ENSMUSG00000034675, ENSMUSG00000029684,…	5884	165	13588	1.23163	1	0.130605	15.6961
GOTERM_BP_FAT	GO:0031175~neuron projection development	113	1.2471	0.0094103	ENSMUSG00000033585, ENSMUSG00000029516, ENSMUSG00000026255, ENSMUSG00000029512, ENSMUSG00000032259, ENSMUSG00000037868, ENSMUSG00000019261, ENSMUSG00000027967, ENSMUSG00000051650, ENSMUSG00000021262, ENSMUSG00000017724, ENSMUSG00000027581, ENSMUSG00000005958, ENSMUSG00000029168, ENSMUSG00000038593, ENSMUSG00000053398, ENSMUSG00000020902, ENSMUSG00000020900, ENSMUSG00000028832, ENSMUSG00000022055,…	5884	218	13588	1.19703	1	0.137501	16.5558
GOTERM_BP_FAT	GO:0009206~purine ribonucleoside triphosphate biosynthetic process	53	0.584924	0.00943953	ENSMUSG00000031441, ENSMUSG00000019210, ENSMUSG00000038690, ENSMUSG00000020788, ENSMUSG00000050856, ENSMUSG00000005553, ENSMUSG00000038717, ENSMUSG00000003072, ENSMUSG00000018770, ENSMUSG00000006057, ENSMUSG00000062683, ENSMUSG00000026576, ENSMUSG00000032087, ENSMUSG00000026575, ENSMUSG00000022956, ENSMUSG00000036622, ENSMUSG00000033379, ENSMUSG00000006567, ENSMUSG00000041329, ENSMUSG00000029467,…	5884	93	13588	1.31606	1	0.137521	16.6029
GOTERM_BP_FAT	GO:0009201~ribonucleoside triphosphate biosynthetic process	53	0.584924	0.00943953	ENSMUSG00000031441, ENSMUSG00000019210, ENSMUSG00000038690, ENSMUSG00000020788, ENSMUSG00000050856, ENSMUSG00000005553, ENSMUSG00000038717, ENSMUSG00000003072, ENSMUSG00000018770, ENSMUSG00000006057, ENSMUSG00000062683, ENSMUSG00000026576, ENSMUSG00000032087, ENSMUSG00000026575, ENSMUSG00000022956, ENSMUSG00000036622, ENSMUSG00000033379, ENSMUSG00000006567, ENSMUSG00000041329, ENSMUSG00000029467,…	5884	93	13588	1.31606	1	0.137521	16.6029
GOTERM_BP_FAT	GO:0007033~vacuole organization	23	0.253835	0.0096267	ENSMUSG00000002103, ENSMUSG00000025232, ENSMUSG00000019726, ENSMUSG00000033124, ENSMUSG00000007891, ENSMUSG00000037234, ENSMUSG00000028048, ENSMUSG00000026289, ENSMUSG00000038295, ENSMUSG00000025907, ENSMUSG00000025579, ENSMUSG00000038160, ENSMUSG00000027244, ENSMUSG00000038417, ENSMUSG00000021665, ENSMUSG00000019969, ENSMUSG00000026317, ENSMUSG00000027602, ENSMUSG00000024121, ENSMUSG00000028419,…	5884	34	13588	1.56218	1	0.139678	16.9041
GOTERM_BP_FAT	GO:0032583~regulation of gene-specific transcription	40	0.441452	0.00977967	ENSMUSG00000000134, ENSMUSG00000005373, ENSMUSG00000035187, ENSMUSG00000001288, ENSMUSG00000029359, ENSMUSG00000022528, ENSMUSG00000022996, ENSMUSG00000034957, ENSMUSG00000028800, ENSMUSG00000020358, ENSMUSG00000005566, ENSMUSG00000023391, ENSMUSG00000021575, ENSMUSG00000052293, ENSMUSG00000041309, ENSMUSG00000021944, ENSMUSG00000023990, ENSMUSG00000037622, ENSMUSG00000024986, ENSMUSG00000022346,…	5884	67	13588	1.37869	1	0.141358	17.1494
GOTERM_BP_FAT	GO:0045926~negative regulation of growth	42	0.463525	0.00984032	ENSMUSG00000005510, ENSMUSG00000044303, ENSMUSG00000037032, ENSMUSG00000029634, ENSMUSG00000021109, ENSMUSG00000036199, ENSMUSG00000002603, ENSMUSG00000029512, ENSMUSG00000036986, ENSMUSG00000056493, ENSMUSG00000024947, ENSMUSG00000042605, ENSMUSG00000008384, ENSMUSG00000041241, ENSMUSG00000020458, ENSMUSG00000031489, ENSMUSG00000029026, ENSMUSG00000020027, ENSMUSG00000059552, ENSMUSG00000022607,…	5884	71	13588	1.36607	1	0.141788	17.2465
GOTERM_BP_FAT	GO:0007269~neurotransmitter secretion	24	0.264871	0.0101903	ENSMUSG00000030805, ENSMUSG00000033768, ENSMUSG00000022568, ENSMUSG00000021071, ENSMUSG00000029468, ENSMUSG00000029071, ENSMUSG00000001018, ENSMUSG00000023192, ENSMUSG00000003872, ENSMUSG00000034656, ENSMUSG00000031840, ENSMUSG00000020894, ENSMUSG00000004113, ENSMUSG00000027162, ENSMUSG00000007207, ENSMUSG00000022973, ENSMUSG00000019969, ENSMUSG00000033615, ENSMUSG00000029608, ENSMUSG00000063887,…	5884	36	13588	1.53954	1	0.146073	17.8047
GOTERM_BP_FAT	GO:0001832~blastocyst growth	13	0.143472	0.0103907	ENSMUSG00000046010, ENSMUSG00000042029, ENSMUSG00000028224, ENSMUSG00000024735, ENSMUSG00000041147, ENSMUSG00000024486, ENSMUSG00000027454, ENSMUSG00000029547, ENSMUSG00000021255, ENSMUSG00000023980, ENSMUSG00000018736, ENSMUSG00000025337, ENSMUSG00000032187	5884	16	13588	1.87632	1	0.148336	18.1227
GOTERM_BP_FAT	GO:0050821~protein stabilization	13	0.143472	0.0103907	ENSMUSG00000027002, ENSMUSG00000029207, ENSMUSG00000031328, ENSMUSG00000034617, ENSMUSG00000037032, ENSMUSG00000021149, ENSMUSG00000001761, ENSMUSG00000039456, ENSMUSG00000026797, ENSMUSG00000011114, ENSMUSG00000076431, ENSMUSG00000031838, ENSMUSG00000042328	5884	16	13588	1.87632	1	0.148336	18.1227
GOTERM_BP_FAT	GO:0001501~skeletal system development	144	1.58923	0.0107143	ENSMUSG00000048583, ENSMUSG00000046714, ENSMUSG00000021109, ENSMUSG00000023781, ENSMUSG00000026739, ENSMUSG00000083534, ENSMUSG00000025402, ENSMUSG00000030732, ENSMUSG00000024462, ENSMUSG00000000942, ENSMUSG00000002799, ENSMUSG00000027868, ENSMUSG00000023391, ENSMUSG00000042448, ENSMUSG00000052155, ENSMUSG00000000690, ENSMUSG00000025921, ENSMUSG00000029231, ENSMUSG00000034612, ENSMUSG00000025213,…	5884	285	13588	1.16681	1	0.152199	18.6336
GOTERM_BP_FAT	GO:0043542~endothelial cell migration	10	0.110363	0.0109706	ENSMUSG00000033933, ENSMUSG00000039713, ENSMUSG00000063856, ENSMUSG00000037936, ENSMUSG00000022443, ENSMUSG00000019433, ENSMUSG00000022607, ENSMUSG00000015605, ENSMUSG00000032083, ENSMUSG00000013663	5884	11	13588	2.09938	1	0.155147	19.0363
GOTERM_BP_FAT	GO:0008088~axon cargo transport	10	0.110363	0.0109706	ENSMUSG00000022892, ENSMUSG00000024862, ENSMUSG00000020745, ENSMUSG00000029104, ENSMUSG00000063077, ENSMUSG00000029223, ENSMUSG00000018736, ENSMUSG00000021288, ENSMUSG00000026131, ENSMUSG00000000738	5884	11	13588	2.09938	1	0.155147	19.0363
GOTERM_BP_FAT	GO:0006268~DNA unwinding during replication	10	0.110363	0.0109706	ENSMUSG00000022779, ENSMUSG00000002870, ENSMUSG00000070544, ENSMUSG00000000934, ENSMUSG00000029730, ENSMUSG00000022673, ENSMUSG00000027323, ENSMUSG00000025209, ENSMUSG00000026355, ENSMUSG00000002814	5884	11	13588	2.09938	1	0.155147	19.0363
GOTERM_BP_FAT	GO:0006289~nucleotide-excision repair	18	0.198654	0.0110877	ENSMUSG00000025077, ENSMUSG00000041429, ENSMUSG00000032298, ENSMUSG00000025060, ENSMUSG00000028426, ENSMUSG00000021694, ENSMUSG00000003813, ENSMUSG00000019470, ENSMUSG00000027845, ENSMUSG00000030271, ENSMUSG00000021461, ENSMUSG00000040681, ENSMUSG00000034345, ENSMUSG00000059552, ENSMUSG00000003549, ENSMUSG00000030094, ENSMUSG00000030400, ENSMUSG00000026048	5884	25	13588	1.66271	1	0.156261	19.2196
GOTERM_BP_FAT	GO:0010741~negative regulation of protein kinase cascade	18	0.198654	0.0110877	ENSMUSG00000020716, ENSMUSG00000029468, ENSMUSG00000037211, ENSMUSG00000009073, ENSMUSG00000034292, ENSMUSG00000018501, ENSMUSG00000022114, ENSMUSG00000005533, ENSMUSG00000032259, ENSMUSG00000038037, ENSMUSG00000042901, ENSMUSG00000005871, ENSMUSG00000020027, ENSMUSG00000002496, ENSMUSG00000046722, ENSMUSG00000036931, ENSMUSG00000041801, ENSMUSG00000013663	5884	25	13588	1.66271	1	0.156261	19.2196
GOTERM_BP_FAT	GO:0008637~apoptotic mitochondrial changes	18	0.198654	0.0110877	ENSMUSG00000004446, ENSMUSG00000025076, ENSMUSG00000021754, ENSMUSG00000003438, ENSMUSG00000037062, ENSMUSG00000003873, ENSMUSG00000051234, ENSMUSG00000001729, ENSMUSG00000002797, ENSMUSG00000031628, ENSMUSG00000047139, ENSMUSG00000006818, ENSMUSG00000002083, ENSMUSG00000029026, ENSMUSG00000007659, ENSMUSG00000059552, ENSMUSG00000022346, ENSMUSG00000068921	5884	25	13588	1.66271	1	0.156261	19.2196
GOTERM_BP_FAT	GO:0009451~RNA modification	27	0.29798	0.0115527	ENSMUSG00000007610, ENSMUSG00000022704, ENSMUSG00000041199, ENSMUSG00000036983, ENSMUSG00000027487, ENSMUSG00000025086, ENSMUSG00000032342, ENSMUSG00000033356, ENSMUSG00000051557, ENSMUSG00000069020, ENSMUSG00000039826, ENSMUSG00000032044, ENSMUSG00000006732, ENSMUSG00000002825, ENSMUSG00000024037, ENSMUSG00000021692, ENSMUSG00000029507, ENSMUSG00000028233, ENSMUSG00000004460, ENSMUSG00000026492,…	5884	42	13588	1.48456	1	0.16186	19.9436
GOTERM_BP_FAT	GO:0034220~ion transmembrane transport	27	0.29798	0.0115527	ENSMUSG00000019302, ENSMUSG00000019210, ENSMUSG00000050856, ENSMUSG00000038717, ENSMUSG00000005553, ENSMUSG00000003072, ENSMUSG00000018770, ENSMUSG00000015575, ENSMUSG00000004285, ENSMUSG00000006057, ENSMUSG00000000563, ENSMUSG00000062683, ENSMUSG00000038023, ENSMUSG00000022956, ENSMUSG00000025428, ENSMUSG00000006273, ENSMUSG00000033793, ENSMUSG00000033379, ENSMUSG00000052459, ENSMUSG00000022890,…	5884	42	13588	1.48456	1	0.16186	19.9436
GOTERM_BP_FAT	GO:0009799~determination of symmetry	28	0.309017	0.0119072	ENSMUSG00000033837, ENSMUSG00000047407, ENSMUSG00000040929, ENSMUSG00000026124, ENSMUSG00000067860, ENSMUSG00000049691, ENSMUSG00000014773, ENSMUSG00000055932, ENSMUSG00000052155, ENSMUSG00000022911, ENSMUSG00000026923, ENSMUSG00000030513, ENSMUSG00000061393, ENSMUSG00000034462, ENSMUSG00000001761, ENSMUSG00000047193, ENSMUSG00000025231, ENSMUSG00000033282, ENSMUSG00000028718, ENSMUSG00000036632,…	5884	44	13588	1.46956	1	0.165981	20.4914
GOTERM_BP_FAT	GO:0008652~cellular amino acid biosynthetic process	28	0.309017	0.0119072	ENSMUSG00000026095, ENSMUSG00000001323, ENSMUSG00000028179, ENSMUSG00000053907, ENSMUSG00000025140, ENSMUSG00000026473, ENSMUSG00000029752, ENSMUSG00000025533, ENSMUSG00000029009, ENSMUSG00000042032, ENSMUSG00000024039, ENSMUSG00000076441, ENSMUSG00000004996, ENSMUSG00000003526, ENSMUSG00000048550, ENSMUSG00000026520, ENSMUSG00000029446, ENSMUSG00000053398, ENSMUSG00000030826, ENSMUSG00000029326,…	5884	44	13588	1.46956	1	0.165981	20.4914
GOTERM_BP_FAT	GO:0009855~determination of bilateral symmetry	28	0.309017	0.0119072	ENSMUSG00000033837, ENSMUSG00000047407, ENSMUSG00000040929, ENSMUSG00000026124, ENSMUSG00000067860, ENSMUSG00000049691, ENSMUSG00000014773, ENSMUSG00000055932, ENSMUSG00000052155, ENSMUSG00000022911, ENSMUSG00000026923, ENSMUSG00000030513, ENSMUSG00000061393, ENSMUSG00000034462, ENSMUSG00000001761, ENSMUSG00000047193, ENSMUSG00000025231, ENSMUSG00000033282, ENSMUSG00000028718, ENSMUSG00000036632,…	5884	44	13588	1.46956	1	0.165981	20.4914
GOTERM_BP_FAT	GO:0048589~developmental growth	56	0.618033	0.0119406	ENSMUSG00000033585, ENSMUSG00000048756, ENSMUSG00000002603, ENSMUSG00000029512, ENSMUSG00000031688, ENSMUSG00000027253, ENSMUSG00000028707, ENSMUSG00000027454, ENSMUSG00000029547, ENSMUSG00000032402, ENSMUSG00000025921, ENSMUSG00000048402, ENSMUSG00000032187, ENSMUSG00000013663, ENSMUSG00000026923, ENSMUSG00000034612, ENSMUSG00000007817, ENSMUSG00000030849, ENSMUSG00000001761, ENSMUSG00000001819,…	5884	100	13588	1.29322	1	0.165974	20.5428
GOTERM_BP_FAT	GO:0051494~negative regulation of cytoskeleton organization	30	0.331089	0.0124855	ENSMUSG00000015222, ENSMUSG00000064302, ENSMUSG00000018293, ENSMUSG00000020476, ENSMUSG00000028059, ENSMUSG00000038775, ENSMUSG00000018411, ENSMUSG00000079523, ENSMUSG00000023022, ENSMUSG00000033392, ENSMUSG00000027254, ENSMUSG00000021262, ENSMUSG00000042099, ENSMUSG00000057738, ENSMUSG00000028745, ENSMUSG00000052727, ENSMUSG00000005871, ENSMUSG00000020315, ENSMUSG00000028943, ENSMUSG00000032479,…	5884	48	13588	1.44332	1	0.17245	21.3775
GOTERM_BP_FAT	GO:0006754~ATP biosynthetic process	47	0.518707	0.0130618	ENSMUSG00000019302, ENSMUSG00000031441, ENSMUSG00000019210, ENSMUSG00000037685, ENSMUSG00000038690, ENSMUSG00000020788, ENSMUSG00000050856, ENSMUSG00000005553, ENSMUSG00000019943, ENSMUSG00000038717, ENSMUSG00000003072, ENSMUSG00000015575, ENSMUSG00000018770, ENSMUSG00000004285, ENSMUSG00000000563, ENSMUSG00000006057, ENSMUSG00000062683, ENSMUSG00000026576, ENSMUSG00000022956, ENSMUSG00000038023,…	5884	82	13588	1.32363	1	0.179234	22.2512
GOTERM_BP_FAT	GO:0048489~synaptic vesicle transport	20	0.220726	0.0131308	ENSMUSG00000030805, ENSMUSG00000022568, ENSMUSG00000021071, ENSMUSG00000034799, ENSMUSG00000029468, ENSMUSG00000001018, ENSMUSG00000026797, ENSMUSG00000031840, ENSMUSG00000020894, ENSMUSG00000025889, ENSMUSG00000035392, ENSMUSG00000047139, ENSMUSG00000007207, ENSMUSG00000022973, ENSMUSG00000019969, ENSMUSG00000033615, ENSMUSG00000029608, ENSMUSG00000063887, ENSMUSG00000028456, ENSMUSG00000061601	5884	29	13588	1.59263	1	0.179634	22.3551
GOTERM_BP_FAT	GO:0031047~gene silencing by RNA	20	0.220726	0.0131308	ENSMUSG00000001424, ENSMUSG00000036698, ENSMUSG00000042500, ENSMUSG00000025571, ENSMUSG00000022718, ENSMUSG00000022774, ENSMUSG00000031527, ENSMUSG00000028330, ENSMUSG00000028842, ENSMUSG00000052707, ENSMUSG00000027951, ENSMUSG00000067150, ENSMUSG00000040629, ENSMUSG00000037364, ENSMUSG00000002227, ENSMUSG00000041530, ENSMUSG00000050966, ENSMUSG00000023051, ENSMUSG00000034610, ENSMUSG00000047888	5884	29	13588	1.59263	1	0.179634	22.3551
GOTERM_BP_FAT	GO:0016197~endosome transport	20	0.220726	0.0131308	ENSMUSG00000054364, ENSMUSG00000021589, ENSMUSG00000030172, ENSMUSG00000031328, ENSMUSG00000020128, ENSMUSG00000034602, ENSMUSG00000037234, ENSMUSG00000004567, ENSMUSG00000020078, ENSMUSG00000025422, ENSMUSG00000034867, ENSMUSG00000028080, ENSMUSG00000026024, ENSMUSG00000028419, ENSMUSG00000034190, ENSMUSG00000029104, ENSMUSG00000031479, ENSMUSG00000028572, ENSMUSG00000024772, ENSMUSG00000009907	5884	29	13588	1.59263	1	0.179634	22.3551
GOTERM_BP_FAT	GO:0043523~regulation of neuron apoptosis	46	0.50767	0.0131546	ENSMUSG00000020052, ENSMUSG00000048482, ENSMUSG00000018166, ENSMUSG00000000826, ENSMUSG00000022957, ENSMUSG00000029026, ENSMUSG00000026826, ENSMUSG00000026805, ENSMUSG00000059552, ENSMUSG00000048895, ENSMUSG00000078919, ENSMUSG00000024151, ENSMUSG00000028969, ENSMUSG00000034891, ENSMUSG00000024399, ENSMUSG00000020716, ENSMUSG00000028992, ENSMUSG00000030265, ENSMUSG00000028914, ENSMUSG00000032456,…	5884	80	13588	1.32786	1	0.17947	22.3909
GOTERM_BP_FAT	GO:0009116~nucleoside metabolic process	34	0.375235	0.0132028	ENSMUSG00000019795, ENSMUSG00000027203, ENSMUSG00000022704, ENSMUSG00000020935, ENSMUSG00000053907, ENSMUSG00000033610, ENSMUSG00000039197, ENSMUSG00000079104, ENSMUSG00000037601, ENSMUSG00000032087, ENSMUSG00000026575, ENSMUSG00000024177, ENSMUSG00000015869, ENSMUSG00000042032, ENSMUSG00000006589, ENSMUSG00000063849, ENSMUSG00000002825, ENSMUSG00000017697, ENSMUSG00000018846, ENSMUSG00000020857,…	5884	56	13588	1.40208	1	0.17961	22.4634
GOTERM_BP_FAT	GO:0051248~negative regulation of protein metabolic process	45	0.496634	0.0132381	ENSMUSG00000020091, ENSMUSG00000052684, ENSMUSG00000024423, ENSMUSG00000029613, ENSMUSG00000020227, ENSMUSG00000044303, ENSMUSG00000021149, ENSMUSG00000039515, ENSMUSG00000019773, ENSMUSG00000026511, ENSMUSG00000024927, ENSMUSG00000020849, ENSMUSG00000045896, ENSMUSG00000028842, ENSMUSG00000009549, ENSMUSG00000038160, ENSMUSG00000052707, ENSMUSG00000025469, ENSMUSG00000004768, ENSMUSG00000050965,…	5884	78	13588	1.3323	1	0.179589	22.5165
GOTERM_BP_FAT	GO:0050905~neuromuscular process	36	0.397307	0.0133842	ENSMUSG00000021609, ENSMUSG00000031996, ENSMUSG00000034593, ENSMUSG00000032394, ENSMUSG00000020745, ENSMUSG00000028341, ENSMUSG00000021557, ENSMUSG00000074637, ENSMUSG00000031688, ENSMUSG00000028224, ENSMUSG00000025579, ENSMUSG00000032259, ENSMUSG00000002771, ENSMUSG00000059003, ENSMUSG00000021665, ENSMUSG00000022840, ENSMUSG00000041309, ENSMUSG00000005069, ENSMUSG00000000263, ENSMUSG00000018012,…	5884	60	13588	1.38559	1	0.180933	22.7358
GOTERM_BP_FAT	GO:0032956~regulation of actin cytoskeleton organization	36	0.397307	0.0133842	ENSMUSG00000018293, ENSMUSG00000020476, ENSMUSG00000038775, ENSMUSG00000026755, ENSMUSG00000079523, ENSMUSG00000023022, ENSMUSG00000021262, ENSMUSG00000042099, ENSMUSG00000057738, ENSMUSG00000044042, ENSMUSG00000028745, ENSMUSG00000043079, ENSMUSG00000020315, ENSMUSG00000028991, ENSMUSG00000010175, ENSMUSG00000032740, ENSMUSG00000021061, ENSMUSG00000021754, ENSMUSG00000058587, ENSMUSG00000070372,…	5884	60	13588	1.38559	1	0.180933	22.7358
GOTERM_BP_FAT	GO:0045454~cell redox homeostasis	37	0.408343	0.0134386	ENSMUSG00000021072, ENSMUSG00000028691, ENSMUSG00000026820, ENSMUSG00000018196, ENSMUSG00000028367, ENSMUSG00000022844, ENSMUSG00000005354, ENSMUSG00000028343, ENSMUSG00000025823, ENSMUSG00000022498, ENSMUSG00000024997, ENSMUSG00000028843, ENSMUSG00000031584, ENSMUSG00000058709, ENSMUSG00000028567, ENSMUSG00000025408, ENSMUSG00000046750, ENSMUSG00000031068, ENSMUSG00000021102, ENSMUSG00000050043,…	5884	62	13588	1.37814	1	0.181144	22.8174
GOTERM_BP_FAT	GO:0046777~protein amino acid autophosphorylation	39	0.430416	0.0134849	ENSMUSG00000007613, ENSMUSG00000029613, ENSMUSG00000020227, ENSMUSG00000018209, ENSMUSG00000027365, ENSMUSG00000029471, ENSMUSG00000029512, ENSMUSG00000005534, ENSMUSG00000022781, ENSMUSG00000005672, ENSMUSG00000005533, ENSMUSG00000026034, ENSMUSG00000005566, ENSMUSG00000031668, ENSMUSG00000000416, ENSMUSG00000042228, ENSMUSG00000020122, ENSMUSG00000022607, ENSMUSG00000014932, ENSMUSG00000057897,…	5884	66	13588	1.36459	1	0.181254	22.8867
GOTERM_BP_FAT	GO:0048562~embryonic organ morphogenesis	85	0.938086	0.0139705	ENSMUSG00000029275, ENSMUSG00000007613, ENSMUSG00000020170, ENSMUSG00000046714, ENSMUSG00000000782, ENSMUSG00000028341, ENSMUSG00000038248, ENSMUSG00000026739, ENSMUSG00000000942, ENSMUSG00000018537, ENSMUSG00000021359, ENSMUSG00000045294, ENSMUSG00000032402, ENSMUSG00000027868, ENSMUSG00000014773, ENSMUSG00000023391, ENSMUSG00000038331, ENSMUSG00000048904, ENSMUSG00000071796, ENSMUSG00000000690,…	5884	161	13588	1.2192	1	0.186703	23.6101
GOTERM_BP_FAT	GO:0006914~autophagy	21	0.231762	0.0139944	ENSMUSG00000021619, ENSMUSG00000002820, ENSMUSG00000020057, ENSMUSG00000026280, ENSMUSG00000033124, ENSMUSG00000007891, ENSMUSG00000002320, ENSMUSG00000026289, ENSMUSG00000041895, ENSMUSG00000038295, ENSMUSG00000025907, ENSMUSG00000038160, ENSMUSG00000022663, ENSMUSG00000027244, ENSMUSG00000034789, ENSMUSG00000019969, ENSMUSG00000027602, ENSMUSG00000031812, ENSMUSG00000047767, ENSMUSG00000022620,…	5884	31	13588	1.56437	1	0.186526	23.6455
GOTERM_BP_FAT	GO:0007350~blastoderm segmentation	8	0.0882905	0.0141481	ENSMUSG00000027002, ENSMUSG00000055799, ENSMUSG00000030513, ENSMUSG00000018604, ENSMUSG00000020170, ENSMUSG00000032494, ENSMUSG00000033282, ENSMUSG00000048402	5884	8	13588	2.30931	1	0.187913	23.8731
GOTERM_BP_FAT	GO:0009083~branched chain family amino acid catabolic process	8	0.0882905	0.0141481	ENSMUSG00000021460, ENSMUSG00000060376, ENSMUSG00000030826, ENSMUSG00000030268, ENSMUSG00000032263, ENSMUSG00000030802, ENSMUSG00000031969, ENSMUSG00000041426	5884	8	13588	2.30931	1	0.187913	23.8731
GOTERM_BP_FAT	GO:0006333~chromatin assembly or disassembly	60	0.662179	0.0144483	ENSMUSG00000053754, ENSMUSG00000069272, ENSMUSG00000069274, ENSMUSG00000005470, ENSMUSG00000060743, ENSMUSG00000024926, ENSMUSG00000056895, ENSMUSG00000031715, ENSMUSG00000058385, ENSMUSG00000054766, ENSMUSG00000018509, ENSMUSG00000058773, ENSMUSG00000075031, ENSMUSG00000031540, ENSMUSG00000032481, ENSMUSG00000021767, ENSMUSG00000060981, ENSMUSG00000032187, ENSMUSG00000062270, ENSMUSG00000059119,…	5884	109	13588	1.27118	1	0.191044	24.3156
GOTERM_BP_FAT	GO:0048709~oligodendrocyte differentiation	15	0.165545	0.0145388	ENSMUSG00000033006, ENSMUSG00000036098, ENSMUSG00000020052, ENSMUSG00000028683, ENSMUSG00000035187, ENSMUSG00000029145, ENSMUSG00000039830, ENSMUSG00000001496, ENSMUSG00000027434, ENSMUSG00000004788, ENSMUSG00000041309, ENSMUSG00000027168, ENSMUSG00000030400, ENSMUSG00000028551, ENSMUSG00000029388	5884	20	13588	1.73199	1	0.191651	24.4484
GOTERM_BP_FAT	GO:0048145~regulation of fibroblast proliferation	15	0.165545	0.0145388	ENSMUSG00000047407, ENSMUSG00000007817, ENSMUSG00000000120, ENSMUSG00000030717, ENSMUSG00000061878, ENSMUSG00000029135, ENSMUSG00000003873, ENSMUSG00000039456, ENSMUSG00000028224, ENSMUSG00000033373, ENSMUSG00000006818, ENSMUSG00000021504, ENSMUSG00000059552, ENSMUSG00000032494, ENSMUSG00000031838	5884	20	13588	1.73199	1	0.191651	24.4484
GOTERM_BP_FAT	GO:0030433~ER-associated protein catabolic process	11	0.121399	0.0148811	ENSMUSG00000039703, ENSMUSG00000055401, ENSMUSG00000041556, ENSMUSG00000009293, ENSMUSG00000036646, ENSMUSG00000016552, ENSMUSG00000040462, ENSMUSG00000030104, ENSMUSG00000020048, ENSMUSG00000022365, ENSMUSG00000031751	5884	13	13588	1.95403	1	0.195241	24.9493
GOTERM_BP_FAT	GO:0009165~nucleotide biosynthetic process	91	1.0043	0.0149006	ENSMUSG00000031441, ENSMUSG00000019210, ENSMUSG00000050856, ENSMUSG00000020788, ENSMUSG00000038690, ENSMUSG00000005553, ENSMUSG00000038717, ENSMUSG00000003072, ENSMUSG00000018770, ENSMUSG00000042751, ENSMUSG00000027823, ENSMUSG00000006057, ENSMUSG00000062683, ENSMUSG00000026576, ENSMUSG00000015961, ENSMUSG00000032087, ENSMUSG00000022956, ENSMUSG00000026575, ENSMUSG00000022840, ENSMUSG00000036622,…	5884	174	13588	1.20774	1	0.194994	24.9777
GOTERM_BP_FAT	GO:0005996~monosaccharide metabolic process	99	1.09259	0.0150387	ENSMUSG00000062646, ENSMUSG00000048583, ENSMUSG00000033400, ENSMUSG00000025791, ENSMUSG00000033065, ENSMUSG00000028980, ENSMUSG00000020260, ENSMUSG00000053604, ENSMUSG00000024959, ENSMUSG00000038372, ENSMUSG00000025503, ENSMUSG00000029171, ENSMUSG00000027533, ENSMUSG00000021748, ENSMUSG00000020766, ENSMUSG00000028961, ENSMUSG00000053870, ENSMUSG00000022474, ENSMUSG00000025579, ENSMUSG00000024900,…	5884	191	13588	1.19697	1	0.196144	25.1789
GOTERM_BP_FAT	GO:0030111~regulation of Wnt receptor signaling pathway	25	0.275908	0.0165292	ENSMUSG00000053754, ENSMUSG00000040249, ENSMUSG00000003068, ENSMUSG00000070348, ENSMUSG00000004637, ENSMUSG00000000142, ENSMUSG00000020218, ENSMUSG00000025902, ENSMUSG00000027985, ENSMUSG00000074637, ENSMUSG00000028517, ENSMUSG00000026872, ENSMUSG00000030772, ENSMUSG00000027004, ENSMUSG00000027253, ENSMUSG00000021974, ENSMUSG00000042901, ENSMUSG00000005871, ENSMUSG00000040158, ENSMUSG00000032717,…	5884	39	13588	1.48033	1	0.212981	27.3167
GOTERM_BP_FAT	GO:0009314~response to radiation	76	0.83876	0.016714	ENSMUSG00000032397, ENSMUSG00000005370, ENSMUSG00000030254, ENSMUSG00000028886, ENSMUSG00000053907, ENSMUSG00000024019, ENSMUSG00000040681, ENSMUSG00000032259, ENSMUSG00000024824, ENSMUSG00000019975, ENSMUSG00000059003, ENSMUSG00000031820, ENSMUSG00000029064, ENSMUSG00000025485, ENSMUSG00000023067, ENSMUSG00000024151, ENSMUSG00000025076, ENSMUSG00000030265, ENSMUSG00000034485, ENSMUSG00000021670,…	5884	143	13588	1.22733	1	0.214588	27.5777
GOTERM_BP_FAT	GO:0006732~coenzyme metabolic process	76	0.83876	0.016714	ENSMUSG00000038240, ENSMUSG00000031782, ENSMUSG00000017307, ENSMUSG00000020935, ENSMUSG00000058076, ENSMUSG00000027618, ENSMUSG00000042751, ENSMUSG00000028980, ENSMUSG00000031584, ENSMUSG00000009566, ENSMUSG00000000171, ENSMUSG00000053604, ENSMUSG00000005683, ENSMUSG00000027452, ENSMUSG00000030541, ENSMUSG00000075706, ENSMUSG00000017453, ENSMUSG00000028405, ENSMUSG00000022536, ENSMUSG00000026784,…	5884	143	13588	1.22733	1	0.214588	27.5777
GOTERM_BP_FAT	GO:0001756~somitogenesis	26	0.286944	0.0169657	ENSMUSG00000030543, ENSMUSG00000046714, ENSMUSG00000037034, ENSMUSG00000027985, ENSMUSG00000055024, ENSMUSG00000020918, ENSMUSG00000023781, ENSMUSG00000031548, ENSMUSG00000032402, ENSMUSG00000014773, ENSMUSG00000003436, ENSMUSG00000059552, ENSMUSG00000027002, ENSMUSG00000024294, ENSMUSG00000046020, ENSMUSG00000000142, ENSMUSG00000036422, ENSMUSG00000027996, ENSMUSG00000026872, ENSMUSG00000034218,…	5884	41	13588	1.46444	1	0.216945	27.9318
GOTERM_BP_FAT	GO:0009064~glutamine family amino acid metabolic process	27	0.29798	0.017336	ENSMUSG00000026095, ENSMUSG00000025140, ENSMUSG00000027823, ENSMUSG00000026473, ENSMUSG00000029752, ENSMUSG00000024654, ENSMUSG00000007039, ENSMUSG00000025533, ENSMUSG00000044005, ENSMUSG00000076441, ENSMUSG00000021125, ENSMUSG00000029992, ENSMUSG00000003526, ENSMUSG00000026520, ENSMUSG00000053398, ENSMUSG00000020899, ENSMUSG00000026787, ENSMUSG00000025190, ENSMUSG00000030630, ENSMUSG00000031672,…	5884	43	13588	1.45003	1	0.220626	28.4497
GOTERM_BP_FAT	GO:0045786~negative regulation of cell cycle	27	0.29798	0.017336	ENSMUSG00000015365, ENSMUSG00000022568, ENSMUSG00000048787, ENSMUSG00000054364, ENSMUSG00000044303, ENSMUSG00000037032, ENSMUSG00000003031, ENSMUSG00000052957, ENSMUSG00000022863, ENSMUSG00000034218, ENSMUSG00000040021, ENSMUSG00000026309, ENSMUSG00000022770, ENSMUSG00000027487, ENSMUSG00000070691, ENSMUSG00000056493, ENSMUSG00000031628, ENSMUSG00000029207, ENSMUSG00000024537, ENSMUSG00000021959,…	5884	43	13588	1.45003	1	0.220626	28.4497
GOTERM_BP_FAT	GO:0031668~cellular response to extracellular stimulus	28	0.309017	0.0176459	ENSMUSG00000063229, ENSMUSG00000004100, ENSMUSG00000007891, ENSMUSG00000018500, ENSMUSG00000025907, ENSMUSG00000038160, ENSMUSG00000020538, ENSMUSG00000052707, ENSMUSG00000021647, ENSMUSG00000026826, ENSMUSG00000059552, ENSMUSG00000027111, ENSMUSG00000029468, ENSMUSG00000033124, ENSMUSG00000020063, ENSMUSG00000058239, ENSMUSG00000027996, ENSMUSG00000026289, ENSMUSG00000038295, ENSMUSG00000024912,…	5884	45	13588	1.43691	1	0.223592	28.8804
GOTERM_BP_FAT	GO:0010564~regulation of cell cycle process	42	0.463525	0.0180001	ENSMUSG00000032397, ENSMUSG00000037032, ENSMUSG00000019773, ENSMUSG00000002603, ENSMUSG00000003814, ENSMUSG00000026309, ENSMUSG00000036986, ENSMUSG00000010592, ENSMUSG00000040327, ENSMUSG00000035576, ENSMUSG00000073542, ENSMUSG00000006585, ENSMUSG00000005871, ENSMUSG00000025758, ENSMUSG00000005732, ENSMUSG00000048904, ENSMUSG00000057113, ENSMUSG00000048787, ENSMUSG00000029062, ENSMUSG00000055670,…	5884	73	13588	1.32865	1	0.227027	29.3697
GOTERM_BP_FAT	GO:0009309~amine biosynthetic process	42	0.463525	0.0180001	ENSMUSG00000021609, ENSMUSG00000030525, ENSMUSG00000026095, ENSMUSG00000001323, ENSMUSG00000028179, ENSMUSG00000015619, ENSMUSG00000053907, ENSMUSG00000025140, ENSMUSG00000071708, ENSMUSG00000026473, ENSMUSG00000037458, ENSMUSG00000029752, ENSMUSG00000006442, ENSMUSG00000038216, ENSMUSG00000025533, ENSMUSG00000029009, ENSMUSG00000026826, ENSMUSG00000042032, ENSMUSG00000024039, ENSMUSG00000076441,…	5884	73	13588	1.32865	1	0.227027	29.3697
GOTERM_BP_FAT	GO:0044093~positive regulation of molecular function	152	1.67752	0.0180512	ENSMUSG00000033170, ENSMUSG00000029433, ENSMUSG00000069631, ENSMUSG00000018500, ENSMUSG00000031714, ENSMUSG00000019370, ENSMUSG00000051234, ENSMUSG00000032259, ENSMUSG00000021453, ENSMUSG00000009621, ENSMUSG00000054136, ENSMUSG00000039942, ENSMUSG00000022840, ENSMUSG00000022788, ENSMUSG00000036438, ENSMUSG00000034108, ENSMUSG00000029586, ENSMUSG00000019979, ENSMUSG00000000276, ENSMUSG00000055980,…	5884	306	13588	1.14711	1	0.227063	29.44
GOTERM_BP_FAT	GO:0018130~heterocycle biosynthetic process	31	0.342126	0.0182648	ENSMUSG00000015536, ENSMUSG00000024588, ENSMUSG00000022742, ENSMUSG00000029199, ENSMUSG00000031543, ENSMUSG00000027618, ENSMUSG00000039616, ENSMUSG00000025140, ENSMUSG00000032293, ENSMUSG00000039197, ENSMUSG00000033735, ENSMUSG00000039096, ENSMUSG00000006589, ENSMUSG00000015806, ENSMUSG00000021061, ENSMUSG00000032786, ENSMUSG00000028684, ENSMUSG00000021496, ENSMUSG00000026520, ENSMUSG00000030725,…	5884	51	13588	1.4037	1	0.228902	29.7332
GOTERM_BP_FAT	GO:0021543~pallium development	32	0.353162	0.0183828	ENSMUSG00000020052, ENSMUSG00000020745, ENSMUSG00000027985, ENSMUSG00000020849, ENSMUSG00000019777, ENSMUSG00000074637, ENSMUSG00000028800, ENSMUSG00000019803, ENSMUSG00000028519, ENSMUSG00000023391, ENSMUSG00000020283, ENSMUSG00000029026, ENSMUSG00000020122, ENSMUSG00000037313, ENSMUSG00000027274, ENSMUSG00000005069, ENSMUSG00000048799, ENSMUSG00000028969, ENSMUSG00000020716, ENSMUSG00000026812,…	5884	53	13588	1.3943	1	0.229672	29.8948
GOTERM_BP_FAT	GO:0000059~protein import into nucleus, docking	12	0.132436	0.0183947	ENSMUSG00000040594, ENSMUSG00000000131, ENSMUSG00000002718, ENSMUSG00000040029, ENSMUSG00000031691, ENSMUSG00000030662, ENSMUSG00000033365, ENSMUSG00000001440, ENSMUSG00000042590, ENSMUSG00000009470, ENSMUSG00000066232, ENSMUSG00000020290	5884	15	13588	1.84745	1	0.229269	29.911
GOTERM_BP_FAT	GO:0032970~regulation of actin filament-based process	36	0.397307	0.0185149	ENSMUSG00000018293, ENSMUSG00000020476, ENSMUSG00000038775, ENSMUSG00000026755, ENSMUSG00000079523, ENSMUSG00000023022, ENSMUSG00000021262, ENSMUSG00000042099, ENSMUSG00000057738, ENSMUSG00000044042, ENSMUSG00000028745, ENSMUSG00000043079, ENSMUSG00000020315, ENSMUSG00000028991, ENSMUSG00000010175, ENSMUSG00000032740, ENSMUSG00000021061, ENSMUSG00000021754, ENSMUSG00000058587, ENSMUSG00000070372,…	5884	61	13588	1.36287	1	0.230058	30.0751
GOTERM_BP_FAT	GO:0043085~positive regulation of catalytic activity	131	1.44576	0.0190233	ENSMUSG00000033170, ENSMUSG00000029433, ENSMUSG00000069631, ENSMUSG00000031714, ENSMUSG00000018500, ENSMUSG00000051234, ENSMUSG00000032259, ENSMUSG00000009621, ENSMUSG00000021453, ENSMUSG00000054136, ENSMUSG00000022840, ENSMUSG00000022788, ENSMUSG00000039942, ENSMUSG00000034108, ENSMUSG00000029586, ENSMUSG00000019979, ENSMUSG00000000276, ENSMUSG00000055980, ENSMUSG00000028062, ENSMUSG00000061393,…	5884	261	13588	1.15908	1	0.235077	30.7652
GOTERM_BP_FAT	GO:0007006~mitochondrial membrane organization	18	0.198654	0.0192286	ENSMUSG00000030882, ENSMUSG00000038084, ENSMUSG00000004446, ENSMUSG00000039016, ENSMUSG00000035505, ENSMUSG00000020219, ENSMUSG00000003438, ENSMUSG00000037062, ENSMUSG00000003873, ENSMUSG00000021079, ENSMUSG00000029020, ENSMUSG00000025889, ENSMUSG00000026317, ENSMUSG00000027076, ENSMUSG00000074170, ENSMUSG00000059552, ENSMUSG00000029104, ENSMUSG00000005069	5884	26	13588	1.59876	1	0.236763	31.042
GOTERM_BP_FAT	GO:0021575~hindbrain morphogenesis	18	0.198654	0.0192286	ENSMUSG00000031985, ENSMUSG00000025223, ENSMUSG00000052957, ENSMUSG00000034656, ENSMUSG00000038765, ENSMUSG00000021557, ENSMUSG00000001761, ENSMUSG00000022528, ENSMUSG00000029512, ENSMUSG00000031523, ENSMUSG00000030302, ENSMUSG00000028519, ENSMUSG00000029595, ENSMUSG00000032238, ENSMUSG00000020037, ENSMUSG00000048402, ENSMUSG00000028946, ENSMUSG00000028969	5884	26	13588	1.59876	1	0.236763	31.042
GOTERM_BP_FAT	GO:0008610~lipid biosynthetic process	142	1.56716	0.019675	ENSMUSG00000038240, ENSMUSG00000023452, ENSMUSG00000025203, ENSMUSG00000020377, ENSMUSG00000018042, ENSMUSG00000001467, ENSMUSG00000038383, ENSMUSG00000029513, ENSMUSG00000006517, ENSMUSG00000017721, ENSMUSG00000019822, ENSMUSG00000021518, ENSMUSG00000010663, ENSMUSG00000079608, ENSMUSG00000021594, ENSMUSG00000005069, ENSMUSG00000073422, ENSMUSG00000031516, ENSMUSG00000026269, ENSMUSG00000023791,…	5884	285	13588	1.15061	1	0.241033	31.6404
GOTERM_BP_FAT	GO:0007051~spindle organization	19	0.20969	0.020415	ENSMUSG00000001525, ENSMUSG00000001151, ENSMUSG00000022443, ENSMUSG00000035198, ENSMUSG00000019773, ENSMUSG00000058290, ENSMUSG00000078762, ENSMUSG00000027469, ENSMUSG00000028832, ENSMUSG00000005233, ENSMUSG00000032534, ENSMUSG00000005732, ENSMUSG00000027285, ENSMUSG00000037313, ENSMUSG00000024790, ENSMUSG00000048799, ENSMUSG00000024056, ENSMUSG00000032498, ENSMUSG00000035439	5884	28	13588	1.56703	1	0.248383	32.6215
GOTERM_BP_FAT	GO:0031669~cellular response to nutrient levels	19	0.20969	0.020415	ENSMUSG00000033124, ENSMUSG00000020063, ENSMUSG00000007891, ENSMUSG00000058239, ENSMUSG00000026289, ENSMUSG00000038295, ENSMUSG00000025907, ENSMUSG00000038160, ENSMUSG00000020538, ENSMUSG00000027244, ENSMUSG00000052707, ENSMUSG00000009772, ENSMUSG00000040891, ENSMUSG00000021647, ENSMUSG00000019969, ENSMUSG00000027602, ENSMUSG00000059552, ENSMUSG00000015461, ENSMUSG00000026641	5884	28	13588	1.56703	1	0.248383	32.6215
GOTERM_BP_FAT	GO:0000045~autophagic vacuole formation	9	0.0993268	0.0210895	ENSMUSG00000038160, ENSMUSG00000027244, ENSMUSG00000027602, ENSMUSG00000019969, ENSMUSG00000033124, ENSMUSG00000007891, ENSMUSG00000026289, ENSMUSG00000025907, ENSMUSG00000038295	5884	10	13588	2.07838	1	0.254941	33.504
GOTERM_BP_FAT	GO:0006270~DNA replication initiation	9	0.0993268	0.0210895	ENSMUSG00000028212, ENSMUSG00000002870, ENSMUSG00000029730, ENSMUSG00000005410, ENSMUSG00000000028, ENSMUSG00000022673, ENSMUSG00000026355, ENSMUSG00000041859, ENSMUSG00000006678	5884	10	13588	2.07838	1	0.254941	33.504
GOTERM_BP_FAT	GO:0009628~response to abiotic stimulus	126	1.39057	0.0212469	ENSMUSG00000032397, ENSMUSG00000030254, ENSMUSG00000053907, ENSMUSG00000018507, ENSMUSG00000032259, ENSMUSG00000024824, ENSMUSG00000019822, ENSMUSG00000019975, ENSMUSG00000025485, ENSMUSG00000042699, ENSMUSG00000024151, ENSMUSG00000025076, ENSMUSG00000051456, ENSMUSG00000030265, ENSMUSG00000051596, ENSMUSG00000078773, ENSMUSG00000020704, ENSMUSG00000018449, ENSMUSG00000007659, ENSMUSG00000035211,…	5884	251	13588	1.15926	1	0.25602	33.7085
GOTERM_BP_FAT	GO:0001578~microtubule bundle formation	13	0.143472	0.0214722	ENSMUSG00000020390, ENSMUSG00000019261, ENSMUSG00000015222, ENSMUSG00000020308, ENSMUSG00000052727, ENSMUSG00000019996, ENSMUSG00000009418, ENSMUSG00000021573, ENSMUSG00000030276, ENSMUSG00000068744, ENSMUSG00000006435, ENSMUSG00000002031, ENSMUSG00000024068	5884	17	13588	1.76595	1	0.257798	33.9999
GOTERM_BP_FAT	GO:0035023~regulation of Rho protein signal transduction	48	0.529743	0.0219969	ENSMUSG00000027699, ENSMUSG00000031442, ENSMUSG00000009681, ENSMUSG00000022568, ENSMUSG00000040940, ENSMUSG00000020021, ENSMUSG00000045875, ENSMUSG00000020745, ENSMUSG00000024241, ENSMUSG00000028059, ENSMUSG00000025265, ENSMUSG00000019467, ENSMUSG00000032875, ENSMUSG00000052921, ENSMUSG00000009621, ENSMUSG00000022957, ENSMUSG00000022788, ENSMUSG00000051517, ENSMUSG00000040964, ENSMUSG00000027581,…	5884	86	13588	1.28892	1	0.262663	34.6742
GOTERM_BP_FAT	GO:0031644~regulation of neurological system process	61	0.673215	0.0223161	ENSMUSG00000048482, ENSMUSG00000032259, ENSMUSG00000037868, ENSMUSG00000054814, ENSMUSG00000059003, ENSMUSG00000032482, ENSMUSG00000051790, ENSMUSG00000001985, ENSMUSG00000024399, ENSMUSG00000030265, ENSMUSG00000028833, ENSMUSG00000034656, ENSMUSG00000028161, ENSMUSG00000019433, ENSMUSG00000005469, ENSMUSG00000025586, ENSMUSG00000032336, ENSMUSG00000025889, ENSMUSG00000016028, ENSMUSG00000019969,…	5884	113	13588	1.24662	1	0.265366	35.0811
GOTERM_BP_FAT	GO:0051969~regulation of transmission of nerve impulse	58	0.640106	0.0235886	ENSMUSG00000048482, ENSMUSG00000032259, ENSMUSG00000037868, ENSMUSG00000054814, ENSMUSG00000059003, ENSMUSG00000032482, ENSMUSG00000051790, ENSMUSG00000001985, ENSMUSG00000024399, ENSMUSG00000030265, ENSMUSG00000028833, ENSMUSG00000034656, ENSMUSG00000028161, ENSMUSG00000019433, ENSMUSG00000005469, ENSMUSG00000025586, ENSMUSG00000032336, ENSMUSG00000025889, ENSMUSG00000016028, ENSMUSG00000019969,…	5884	107	13588	1.25178	1	0.277717	36.6796
GOTERM_BP_FAT	GO:0010952~positive regulation of peptidase activity	23	0.253835	0.0236707	ENSMUSG00000028914, ENSMUSG00000029433, ENSMUSG00000003873, ENSMUSG00000034485, ENSMUSG00000062203, ENSMUSG00000063694, ENSMUSG00000039959, ENSMUSG00000036986, ENSMUSG00000051234, ENSMUSG00000024947, ENSMUSG00000041241, ENSMUSG00000028191, ENSMUSG00000028452, ENSMUSG00000028282, ENSMUSG00000031668, ENSMUSG00000038058, ENSMUSG00000002083, ENSMUSG00000019979, ENSMUSG00000024012, ENSMUSG00000059552,…	5884	36	13588	1.47539	1	0.277938	36.7814
GOTERM_BP_FAT	GO:0043280~positive regulation of caspase activity	23	0.253835	0.0236707	ENSMUSG00000028914, ENSMUSG00000029433, ENSMUSG00000003873, ENSMUSG00000034485, ENSMUSG00000062203, ENSMUSG00000063694, ENSMUSG00000039959, ENSMUSG00000036986, ENSMUSG00000051234, ENSMUSG00000024947, ENSMUSG00000041241, ENSMUSG00000028191, ENSMUSG00000028452, ENSMUSG00000028282, ENSMUSG00000031668, ENSMUSG00000038058, ENSMUSG00000002083, ENSMUSG00000019979, ENSMUSG00000024012, ENSMUSG00000059552,…	5884	36	13588	1.47539	1	0.277938	36.7814
GOTERM_BP_FAT	GO:0035270~endocrine system development	41	0.452489	0.0240105	ENSMUSG00000021609, ENSMUSG00000007613, ENSMUSG00000037034, ENSMUSG00000035187, ENSMUSG00000021685, ENSMUSG00000074637, ENSMUSG00000022528, ENSMUSG00000049796, ENSMUSG00000015053, ENSMUSG00000006134, ENSMUSG00000032259, ENSMUSG00000032402, ENSMUSG00000031668, ENSMUSG00000027434, ENSMUSG00000026751, ENSMUSG00000041309, ENSMUSG00000027239, ENSMUSG00000024986, ENSMUSG00000032083, ENSMUSG00000048616,…	5884	72	13588	1.31503	1	0.280739	37.2013
GOTERM_BP_FAT	GO:0030330~DNA damage response, signal transduction by p53 class mediator	14	0.154508	0.024126	ENSMUSG00000030717, ENSMUSG00000030330, ENSMUSG00000008730, ENSMUSG00000024926, ENSMUSG00000033307, ENSMUSG00000036986, ENSMUSG00000041147, ENSMUSG00000029535, ENSMUSG00000053175, ENSMUSG00000002083, ENSMUSG00000059552, ENSMUSG00000028630, ENSMUSG00000041801, ENSMUSG00000030609	5884	19	13588	1.7016	1	0.281283	37.3434
GOTERM_BP_FAT	GO:0045860~positive regulation of protein kinase activity	66	0.728396	0.0249268	ENSMUSG00000020170, ENSMUSG00000033170, ENSMUSG00000069631, ENSMUSG00000031714, ENSMUSG00000024924, ENSMUSG00000040687, ENSMUSG00000043733, ENSMUSG00000028019, ENSMUSG00000021453, ENSMUSG00000015312, ENSMUSG00000022788, ENSMUSG00000029586, ENSMUSG00000032494, ENSMUSG00000057113, ENSMUSG00000032740, ENSMUSG00000000276, ENSMUSG00000029468, ENSMUSG00000061393, ENSMUSG00000028062, ENSMUSG00000061878,…	5884	124	13588	1.22915	1	0.288599	38.3203
GOTERM_BP_FAT	GO:0010639~negative regulation of organelle organization	36	0.397307	0.0250952	ENSMUSG00000015222, ENSMUSG00000064302, ENSMUSG00000018293, ENSMUSG00000020476, ENSMUSG00000028059, ENSMUSG00000038775, ENSMUSG00000018411, ENSMUSG00000025469, ENSMUSG00000079523, ENSMUSG00000023022, ENSMUSG00000033392, ENSMUSG00000027254, ENSMUSG00000021262, ENSMUSG00000042099, ENSMUSG00000057738, ENSMUSG00000028745, ENSMUSG00000052727, ENSMUSG00000005871, ENSMUSG00000020315, ENSMUSG00000028943,…	5884	62	13588	1.34089	1	0.289636	38.524
GOTERM_BP_FAT	GO:0046365~monosaccharide catabolic process	32	0.353162	0.0255417	ENSMUSG00000021748, ENSMUSG00000032294, ENSMUSG00000021913, ENSMUSG00000028961, ENSMUSG00000063229, ENSMUSG00000004267, ENSMUSG00000033065, ENSMUSG00000028980, ENSMUSG00000020456, ENSMUSG00000053604, ENSMUSG00000031807, ENSMUSG00000057666, ENSMUSG00000025236, ENSMUSG00000024959, ENSMUSG00000011752, ENSMUSG00000022536, ENSMUSG00000020321, ENSMUSG00000000628, ENSMUSG00000029776, ENSMUSG00000043262,…	5884	54	13588	1.36848	1	0.293376	39.0606
GOTERM_BP_FAT	GO:0006497~protein amino acid lipidation	30	0.331089	0.0255489	ENSMUSG00000028158, ENSMUSG00000050229, ENSMUSG00000026698, ENSMUSG00000020936, ENSMUSG00000038383, ENSMUSG00000017721, ENSMUSG00000031823, ENSMUSG00000030990, ENSMUSG00000022561, ENSMUSG00000078919, ENSMUSG00000025786, ENSMUSG00000021619, ENSMUSG00000029263, ENSMUSG00000039470, ENSMUSG00000023791, ENSMUSG00000035798, ENSMUSG00000079469, ENSMUSG00000045625, ENSMUSG00000035845, ENSMUSG00000022940,…	5884	50	13588	1.38559	1	0.292825	39.0692
GOTERM_BP_FAT	GO:0043524~negative regulation of neuron apoptosis	30	0.331089	0.0255489	ENSMUSG00000048482, ENSMUSG00000018166, ENSMUSG00000000826, ENSMUSG00000022957, ENSMUSG00000029026, ENSMUSG00000026826, ENSMUSG00000026805, ENSMUSG00000078919, ENSMUSG00000024151, ENSMUSG00000034891, ENSMUSG00000030265, ENSMUSG00000024290, ENSMUSG00000034656, ENSMUSG00000003873, ENSMUSG00000041911, ENSMUSG00000017716, ENSMUSG00000021549, ENSMUSG00000021253, ENSMUSG00000022055, ENSMUSG00000025889,…	5884	50	13588	1.38559	1	0.292825	39.0692
GOTERM_BP_FAT	GO:0006007~glucose catabolic process	31	0.342126	0.025567	ENSMUSG00000021748, ENSMUSG00000032294, ENSMUSG00000021913, ENSMUSG00000028961, ENSMUSG00000063229, ENSMUSG00000004267, ENSMUSG00000033065, ENSMUSG00000028980, ENSMUSG00000020456, ENSMUSG00000053604, ENSMUSG00000031807, ENSMUSG00000057666, ENSMUSG00000025236, ENSMUSG00000024959, ENSMUSG00000011752, ENSMUSG00000022536, ENSMUSG00000020321, ENSMUSG00000000628, ENSMUSG00000029776, ENSMUSG00000043262,…	5884	52	13588	1.37671	1	0.292381	39.0909
GOTERM_BP_FAT	GO:0019320~hexose catabolic process	31	0.342126	0.025567	ENSMUSG00000021748, ENSMUSG00000032294, ENSMUSG00000021913, ENSMUSG00000028961, ENSMUSG00000063229, ENSMUSG00000004267, ENSMUSG00000033065, ENSMUSG00000028980, ENSMUSG00000020456, ENSMUSG00000053604, ENSMUSG00000031807, ENSMUSG00000057666, ENSMUSG00000025236, ENSMUSG00000024959, ENSMUSG00000011752, ENSMUSG00000022536, ENSMUSG00000020321, ENSMUSG00000000628, ENSMUSG00000029776, ENSMUSG00000043262,…	5884	52	13588	1.37671	1	0.292381	39.0909
GOTERM_BP_FAT	GO:0045168~cell-cell signaling involved in cell fate specification	15	0.165545	0.0263896	ENSMUSG00000031665, ENSMUSG00000001496, ENSMUSG00000020170, ENSMUSG00000037211, ENSMUSG00000000125, ENSMUSG00000042499, ENSMUSG00000031565, ENSMUSG00000051367, ENSMUSG00000001656, ENSMUSG00000074637, ENSMUSG00000038805, ENSMUSG00000005320, ENSMUSG00000038210, ENSMUSG00000031074, ENSMUSG00000026565	5884	21	13588	1.64951	1	0.299687	40.0677
GOTERM_BP_FAT	GO:0033044~regulation of chromosome organization	15	0.165545	0.0263896	ENSMUSG00000002028, ENSMUSG00000064796, ENSMUSG00000002603, ENSMUSG00000018501, ENSMUSG00000074781, ENSMUSG00000036986, ENSMUSG00000024947, ENSMUSG00000025469, ENSMUSG00000020390, ENSMUSG00000018509, ENSMUSG00000014030, ENSMUSG00000005698, ENSMUSG00000059552, ENSMUSG00000031921, ENSMUSG00000033762	5884	21	13588	1.64951	1	0.299687	40.0677
GOTERM_BP_FAT	GO:0007031~peroxisome organization	15	0.165545	0.0263896	ENSMUSG00000030545, ENSMUSG00000028975, ENSMUSG00000040374, ENSMUSG00000017307, ENSMUSG00000005907, ENSMUSG00000019809, ENSMUSG00000027222, ENSMUSG00000020283, ENSMUSG00000067825, ENSMUSG00000019054, ENSMUSG00000018733, ENSMUSG00000002763, ENSMUSG00000029047, ENSMUSG00000047866, ENSMUSG00000005069	5884	21	13588	1.64951	1	0.299687	40.0677
GOTERM_BP_FAT	GO:0031128~developmental induction	15	0.165545	0.0263896	ENSMUSG00000031665, ENSMUSG00000001496, ENSMUSG00000020170, ENSMUSG00000037211, ENSMUSG00000000125, ENSMUSG00000042499, ENSMUSG00000031565, ENSMUSG00000051367, ENSMUSG00000001656, ENSMUSG00000074637, ENSMUSG00000038805, ENSMUSG00000005320, ENSMUSG00000038210, ENSMUSG00000031074, ENSMUSG00000026565	5884	21	13588	1.64951	1	0.299687	40.0677
GOTERM_BP_FAT	GO:0006164~purine nucleotide biosynthetic process	72	0.794614	0.0267263	ENSMUSG00000031441, ENSMUSG00000019210, ENSMUSG00000020788, ENSMUSG00000038690, ENSMUSG00000050856, ENSMUSG00000005553, ENSMUSG00000038717, ENSMUSG00000003072, ENSMUSG00000018770, ENSMUSG00000027823, ENSMUSG00000006057, ENSMUSG00000062683, ENSMUSG00000026576, ENSMUSG00000015961, ENSMUSG00000032087, ENSMUSG00000026575, ENSMUSG00000022956, ENSMUSG00000022840, ENSMUSG00000036622, ENSMUSG00000033379,…	5884	137	13588	1.21365	1	0.302274	40.4632
GOTERM_BP_FAT	GO:0043966~histone H3 acetylation	10	0.110363	0.0270255	ENSMUSG00000030330, ENSMUSG00000031540, ENSMUSG00000025764, ENSMUSG00000038909, ENSMUSG00000026283, ENSMUSG00000020387, ENSMUSG00000020918, ENSMUSG00000021767, ENSMUSG00000028863, ENSMUSG00000020167	5884	12	13588	1.92443	1	0.304484	40.8127
GOTERM_BP_FAT	GO:0051347~positive regulation of transferase activity	71	0.783578	0.0272999	ENSMUSG00000020170, ENSMUSG00000033170, ENSMUSG00000069631, ENSMUSG00000031714, ENSMUSG00000024924, ENSMUSG00000019877, ENSMUSG00000040687, ENSMUSG00000009621, ENSMUSG00000043733, ENSMUSG00000028019, ENSMUSG00000021453, ENSMUSG00000015312, ENSMUSG00000022788, ENSMUSG00000029586, ENSMUSG00000032494, ENSMUSG00000032083, ENSMUSG00000057113, ENSMUSG00000032740, ENSMUSG00000000276, ENSMUSG00000055980,…	5884	135	13588	1.21453	1	0.306443	41.1314
GOTERM_BP_FAT	GO:0001525~angiogenesis	70	0.772542	0.0278855	ENSMUSG00000033933, ENSMUSG00000046714, ENSMUSG00000061353, ENSMUSG00000021109, ENSMUSG00000020937, ENSMUSG00000021266, ENSMUSG00000045005, ENSMUSG00000045216, ENSMUSG00000029648, ENSMUSG00000025856, ENSMUSG00000024962, ENSMUSG00000027314, ENSMUSG00000022607, ENSMUSG00000058620, ENSMUSG00000044813, ENSMUSG00000013663, ENSMUSG00000026923, ENSMUSG00000001435, ENSMUSG00000031965, ENSMUSG00000022443,…	5884	133	13588	1.21543	1	0.311302	41.8061
GOTERM_BP_FAT	GO:0009896~positive regulation of catabolic process	16	0.176581	0.0283032	ENSMUSG00000024425, ENSMUSG00000025509, ENSMUSG00000055653, ENSMUSG00000005373, ENSMUSG00000032540, ENSMUSG00000039615, ENSMUSG00000031555, ENSMUSG00000051675, ENSMUSG00000001729, ENSMUSG00000027598, ENSMUSG00000058709, ENSMUSG00000032350, ENSMUSG00000032216, ENSMUSG00000005871, ENSMUSG00000042303, ENSMUSG00000066551	5884	23	13588	1.60648	1	0.314548	42.2829
GOTERM_BP_FAT	GO:0009267~cellular response to starvation	16	0.176581	0.0283032	ENSMUSG00000033124, ENSMUSG00000020063, ENSMUSG00000007891, ENSMUSG00000026289, ENSMUSG00000038295, ENSMUSG00000025907, ENSMUSG00000038160, ENSMUSG00000020538, ENSMUSG00000027244, ENSMUSG00000052707, ENSMUSG00000009772, ENSMUSG00000040891, ENSMUSG00000021647, ENSMUSG00000019969, ENSMUSG00000027602, ENSMUSG00000059552	5884	23	13588	1.60648	1	0.314548	42.2829
GOTERM_BP_FAT	GO:0008630~DNA damage response, signal transduction resulting in induction of apoptosis	16	0.176581	0.0283032	ENSMUSG00000005370, ENSMUSG00000030717, ENSMUSG00000008730, ENSMUSG00000034485, ENSMUSG00000034218, ENSMUSG00000036986, ENSMUSG00000017146, ENSMUSG00000041147, ENSMUSG00000053175, ENSMUSG00000002083, ENSMUSG00000059552, ENSMUSG00000028630, ENSMUSG00000030322, ENSMUSG00000041801, ENSMUSG00000032498, ENSMUSG00000030609	5884	23	13588	1.60648	1	0.314548	42.2829
GOTERM_BP_FAT	GO:0046825~regulation of protein export from nucleus	7	0.0772542	0.0289638	ENSMUSG00000043733, ENSMUSG00000026196, ENSMUSG00000026667, ENSMUSG00000028367, ENSMUSG00000005469, ENSMUSG00000028969, ENSMUSG00000022812	5884	7	13588	2.30931	1	0.320001	43.0295
GOTERM_BP_FAT	GO:0006563~L-serine metabolic process	7	0.0772542	0.0289638	ENSMUSG00000024640, ENSMUSG00000001323, ENSMUSG00000020534, ENSMUSG00000029446, ENSMUSG00000053398, ENSMUSG00000024039, ENSMUSG00000025403	5884	7	13588	2.30931	1	0.320001	43.0295
GOTERM_BP_FAT	GO:0015937~coenzyme A biosynthetic process	7	0.0772542	0.0289638	ENSMUSG00000018846, ENSMUSG00000001755, ENSMUSG00000037514, ENSMUSG00000020935, ENSMUSG00000029056, ENSMUSG00000063849, ENSMUSG00000033610	5884	7	13588	2.30931	1	0.320001	43.0295
GOTERM_BP_FAT	GO:0051651~maintenance of location in cell	17	0.187617	0.0299072	ENSMUSG00000031328, ENSMUSG00000040462, ENSMUSG00000002778, ENSMUSG00000026683, ENSMUSG00000039456, ENSMUSG00000025231, ENSMUSG00000002985, ENSMUSG00000033952, ENSMUSG00000036986, ENSMUSG00000010517, ENSMUSG00000052707, ENSMUSG00000028465, ENSMUSG00000026751, ENSMUSG00000079111, ENSMUSG00000037313, ENSMUSG00000079614, ENSMUSG00000032199	5884	25	13588	1.57033	1	0.327956	44.0797
GOTERM_BP_FAT	GO:0009798~axis specification	18	0.198654	0.0312397	ENSMUSG00000027002, ENSMUSG00000021796, ENSMUSG00000030513, ENSMUSG00000020170, ENSMUSG00000025223, ENSMUSG00000073678, ENSMUSG00000038793, ENSMUSG00000028718, ENSMUSG00000055799, ENSMUSG00000034777, ENSMUSG00000018604, ENSMUSG00000037171, ENSMUSG00000005871, ENSMUSG00000032717, ENSMUSG00000032494, ENSMUSG00000047248, ENSMUSG00000070526, ENSMUSG00000027168	5884	27	13588	1.53954	1	0.339261	45.5318
GOTERM_BP_FAT	GO:0050804~regulation of synaptic transmission	54	0.595961	0.0316281	ENSMUSG00000048482, ENSMUSG00000032259, ENSMUSG00000037868, ENSMUSG00000054814, ENSMUSG00000059003, ENSMUSG00000032482, ENSMUSG00000051790, ENSMUSG00000001985, ENSMUSG00000024399, ENSMUSG00000030265, ENSMUSG00000028833, ENSMUSG00000028161, ENSMUSG00000034656, ENSMUSG00000019433, ENSMUSG00000005469, ENSMUSG00000025586, ENSMUSG00000032336, ENSMUSG00000025889, ENSMUSG00000016028, ENSMUSG00000019969,…	5884	100	13588	1.24703	1	0.342033	45.9484
GOTERM_BP_FAT	GO:0032319~regulation of Rho GTPase activity	11	0.121399	0.0319598	ENSMUSG00000028991, ENSMUSG00000050310, ENSMUSG00000022568, ENSMUSG00000024142, ENSMUSG00000032356, ENSMUSG00000020745, ENSMUSG00000027581, ENSMUSG00000026024, ENSMUSG00000034255, ENSMUSG00000024096, ENSMUSG00000018736	5884	14	13588	1.81446	1	0.34428	46.3017
GOTERM_BP_FAT	GO:0035195~gene silencing by miRNA	11	0.121399	0.0319598	ENSMUSG00000052707, ENSMUSG00000036698, ENSMUSG00000042500, ENSMUSG00000022718, ENSMUSG00000037364, ENSMUSG00000002227, ENSMUSG00000041530, ENSMUSG00000023051, ENSMUSG00000050966, ENSMUSG00000028842, ENSMUSG00000034610	5884	14	13588	1.81446	1	0.34428	46.3017
GOTERM_BP_FAT	GO:0048511~rhythmic process	53	0.584924	0.0322447	ENSMUSG00000048756, ENSMUSG00000003949, ENSMUSG00000023781, ENSMUSG00000053907, ENSMUSG00000018501, ENSMUSG00000020889, ENSMUSG00000032259, ENSMUSG00000037868, ENSMUSG00000029238, ENSMUSG00000031870, ENSMUSG00000006567, ENSMUSG00000020038, ENSMUSG00000037428, ENSMUSG00000006728, ENSMUSG00000068742, ENSMUSG00000024454, ENSMUSG00000039994, ENSMUSG00000029848, ENSMUSG00000062960, ENSMUSG00000005883,…	5884	98	13588	1.24891	1	0.346102	46.6035
GOTERM_BP_FAT	GO:0007569~cell aging	19	0.20969	0.0323346	ENSMUSG00000007817, ENSMUSG00000044303, ENSMUSG00000039456, ENSMUSG00000052056, ENSMUSG00000033307, ENSMUSG00000036986, ENSMUSG00000000282, ENSMUSG00000032410, ENSMUSG00000018604, ENSMUSG00000041147, ENSMUSG00000067847, ENSMUSG00000000093, ENSMUSG00000022982, ENSMUSG00000024174, ENSMUSG00000025499, ENSMUSG00000059552, ENSMUSG00000029104, ENSMUSG00000003549, ENSMUSG00000057113	5884	29	13588	1.513	1	0.346208	46.6983
GOTERM_BP_FAT	GO:0006888~ER to Golgi vesicle-mediated transport	19	0.20969	0.0323346	ENSMUSG00000049299, ENSMUSG00000029148, ENSMUSG00000032112, ENSMUSG00000034893, ENSMUSG00000020149, ENSMUSG00000007777, ENSMUSG00000039367, ENSMUSG00000015013, ENSMUSG00000036391, ENSMUSG00000027429, ENSMUSG00000030298, ENSMUSG00000041891, ENSMUSG00000001576, ENSMUSG00000030304, ENSMUSG00000002395, ENSMUSG00000005881, ENSMUSG00000010392, ENSMUSG00000029104, ENSMUSG00000024068	5884	29	13588	1.513	1	0.346208	46.6983
GOTERM_BP_FAT	GO:0019226~transmission of nerve impulse	113	1.2471	0.0326777	ENSMUSG00000021071, ENSMUSG00000025203, ENSMUSG00000001018, ENSMUSG00000025892, ENSMUSG00000025402, ENSMUSG00000022594, ENSMUSG00000032259, ENSMUSG00000037868, ENSMUSG00000003279, ENSMUSG00000035200, ENSMUSG00000033768, ENSMUSG00000019146, ENSMUSG00000028161, ENSMUSG00000019433, ENSMUSG00000020402, ENSMUSG00000021448, ENSMUSG00000029503, ENSMUSG00000025889, ENSMUSG00000019969, ENSMUSG00000026317,…	5884	226	13588	1.15466	1	0.348516	47.0589
GOTERM_BP_FAT	GO:0048514~blood vessel morphogenesis	100	1.10363	0.0328755	ENSMUSG00000021127, ENSMUSG00000001517, ENSMUSG00000046714, ENSMUSG00000021109, ENSMUSG00000021266, ENSMUSG00000024962, ENSMUSG00000027314, ENSMUSG00000044813, ENSMUSG00000031965, ENSMUSG00000025314, ENSMUSG00000022443, ENSMUSG00000025880, ENSMUSG00000030849, ENSMUSG00000042626, ENSMUSG00000030123, ENSMUSG00000037279, ENSMUSG00000048109, ENSMUSG00000055254, ENSMUSG00000018377, ENSMUSG00000046470,…	5884	198	13588	1.16632	1	0.34955	47.2657
GOTERM_BP_FAT	GO:0006919~activation of caspase activity	21	0.231762	0.0339294	ENSMUSG00000028914, ENSMUSG00000029433, ENSMUSG00000003873, ENSMUSG00000062203, ENSMUSG00000063694, ENSMUSG00000039959, ENSMUSG00000036986, ENSMUSG00000051234, ENSMUSG00000041241, ENSMUSG00000028191, ENSMUSG00000028452, ENSMUSG00000028282, ENSMUSG00000031668, ENSMUSG00000038058, ENSMUSG00000002083, ENSMUSG00000019979, ENSMUSG00000024012, ENSMUSG00000059552, ENSMUSG00000000409, ENSMUSG00000021576,…	5884	33	13588	1.46956	1	0.35792	48.355
GOTERM_BP_FAT	GO:0031344~regulation of cell projection organization	33	0.364198	0.0343962	ENSMUSG00000007613, ENSMUSG00000029634, ENSMUSG00000029516, ENSMUSG00000029512, ENSMUSG00000018411, ENSMUSG00000028664, ENSMUSG00000034384, ENSMUSG00000020458, ENSMUSG00000005871, ENSMUSG00000021451, ENSMUSG00000022607, ENSMUSG00000028991, ENSMUSG00000027394, ENSMUSG00000034656, ENSMUSG00000053646, ENSMUSG00000068327, ENSMUSG00000020902, ENSMUSG00000015605, ENSMUSG00000018965, ENSMUSG00000002031,…	5884	57	13588	1.33697	1	0.361196	48.8306
GOTERM_BP_FAT	GO:0030323~respiratory tube development	60	0.662179	0.0344476	ENSMUSG00000078970, ENSMUSG00000040385, ENSMUSG00000026124, ENSMUSG00000022843, ENSMUSG00000045216, ENSMUSG00000000416, ENSMUSG00000025921, ENSMUSG00000025856, ENSMUSG00000037169, ENSMUSG00000029231, ENSMUSG00000017386, ENSMUSG00000066551, ENSMUSG00000048402, ENSMUSG00000030067, ENSMUSG00000026923, ENSMUSG00000067336, ENSMUSG00000056962, ENSMUSG00000061393, ENSMUSG00000036545, ENSMUSG00000015647,…	5884	113	13588	1.22618	1	0.360938	48.8827
GOTERM_BP_FAT	GO:0007127~meiosis I	22	0.242799	0.0344789	ENSMUSG00000013787, ENSMUSG00000028354, ENSMUSG00000021569, ENSMUSG00000022443, ENSMUSG00000019773, ENSMUSG00000058290, ENSMUSG00000027855, ENSMUSG00000005493, ENSMUSG00000025586, ENSMUSG00000034023, ENSMUSG00000024922, ENSMUSG00000020390, ENSMUSG00000025480, ENSMUSG00000032555, ENSMUSG00000029848, ENSMUSG00000062248, ENSMUSG00000040629, ENSMUSG00000005883, ENSMUSG00000027323, ENSMUSG00000003824,…	5884	35	13588	1.45157	1	0.360513	48.9145
GOTERM_BP_FAT	GO:0042158~lipoprotein biosynthetic process	32	0.353162	0.0346843	ENSMUSG00000028158, ENSMUSG00000050229, ENSMUSG00000026698, ENSMUSG00000020936, ENSMUSG00000002985, ENSMUSG00000038383, ENSMUSG00000017721, ENSMUSG00000031823, ENSMUSG00000030990, ENSMUSG00000022561, ENSMUSG00000078919, ENSMUSG00000032083, ENSMUSG00000025786, ENSMUSG00000021619, ENSMUSG00000029263, ENSMUSG00000039470, ENSMUSG00000023791, ENSMUSG00000035798, ENSMUSG00000079469, ENSMUSG00000045625,…	5884	55	13588	1.3436	1	0.361554	49.1221
GOTERM_BP_FAT	GO:0042552~myelination	23	0.253835	0.0348911	ENSMUSG00000031985, ENSMUSG00000062078, ENSMUSG00000020716, ENSMUSG00000034593, ENSMUSG00000036098, ENSMUSG00000025232, ENSMUSG00000018217, ENSMUSG00000030342, ENSMUSG00000025203, ENSMUSG00000026812, ENSMUSG00000002603, ENSMUSG00000019843, ENSMUSG00000029145, ENSMUSG00000025402, ENSMUSG00000039830, ENSMUSG00000024527, ENSMUSG00000037868, ENSMUSG00000021665, ENSMUSG00000022982, ENSMUSG00000004788,…	5884	37	13588	1.43552	1	0.362601	49.3304
GOTERM_BP_FAT	GO:0006352~transcription initiation	23	0.253835	0.0348911	ENSMUSG00000002658, ENSMUSG00000071359, ENSMUSG00000019302, ENSMUSG00000043866, ENSMUSG00000028899, ENSMUSG00000003680, ENSMUSG00000022828, ENSMUSG00000033543, ENSMUSG00000031487, ENSMUSG00000036980, ENSMUSG00000054321, ENSMUSG00000031585, ENSMUSG00000078941, ENSMUSG00000022682, ENSMUSG00000039117, ENSMUSG00000011158, ENSMUSG00000014767, ENSMUSG00000026803, ENSMUSG00000031314, ENSMUSG00000027304,…	5884	37	13588	1.43552	1	0.362601	49.3304
GOTERM_BP_FAT	GO:0021987~cerebral cortex development	23	0.253835	0.0348911	ENSMUSG00000020716, ENSMUSG00000020052, ENSMUSG00000026812, ENSMUSG00000020745, ENSMUSG00000065954, ENSMUSG00000020849, ENSMUSG00000003873, ENSMUSG00000074637, ENSMUSG00000042453, ENSMUSG00000001496, ENSMUSG00000019803, ENSMUSG00000028519, ENSMUSG00000020283, ENSMUSG00000019969, ENSMUSG00000026959, ENSMUSG00000020122, ENSMUSG00000037313, ENSMUSG00000027274, ENSMUSG00000028613, ENSMUSG00000005069,…	5884	37	13588	1.43552	1	0.362601	49.3304
GOTERM_BP_FAT	GO:0033674~positive regulation of kinase activity	68	0.750469	0.0350895	ENSMUSG00000020170, ENSMUSG00000033170, ENSMUSG00000069631, ENSMUSG00000031714, ENSMUSG00000024924, ENSMUSG00000040687, ENSMUSG00000009621, ENSMUSG00000043733, ENSMUSG00000028019, ENSMUSG00000021453, ENSMUSG00000015312, ENSMUSG00000022788, ENSMUSG00000029586, ENSMUSG00000032494, ENSMUSG00000057113, ENSMUSG00000032740, ENSMUSG00000000276, ENSMUSG00000055980, ENSMUSG00000029468, ENSMUSG00000061393,…	5884	130	13588	1.20795	1	0.363571	49.5294
GOTERM_BP_FAT	GO:0034101~erythrocyte homeostasis	30	0.331089	0.0351506	ENSMUSG00000024588, ENSMUSG00000028691, ENSMUSG00000031543, ENSMUSG00000003812, ENSMUSG00000018501, ENSMUSG00000032293, ENSMUSG00000033813, ENSMUSG00000023951, ENSMUSG00000029004, ENSMUSG00000021474, ENSMUSG00000029711, ENSMUSG00000066595, ENSMUSG00000042228, ENSMUSG00000000690, ENSMUSG00000032519, ENSMUSG00000056962, ENSMUSG00000054191, ENSMUSG00000016526, ENSMUSG00000029287, ENSMUSG00000006705,…	5884	51	13588	1.35842	1	0.363393	49.5905
GOTERM_BP_FAT	GO:0030324~lung development	59	0.651142	0.0351787	ENSMUSG00000078970, ENSMUSG00000040385, ENSMUSG00000026124, ENSMUSG00000022843, ENSMUSG00000045216, ENSMUSG00000000416, ENSMUSG00000025921, ENSMUSG00000025856, ENSMUSG00000037169, ENSMUSG00000029231, ENSMUSG00000066551, ENSMUSG00000048402, ENSMUSG00000030067, ENSMUSG00000026923, ENSMUSG00000067336, ENSMUSG00000056962, ENSMUSG00000061393, ENSMUSG00000036545, ENSMUSG00000015647, ENSMUSG00000030849,…	5884	111	13588	1.22747	1	0.362942	49.6186
GOTERM_BP_FAT	GO:0035264~multicellular organism growth	24	0.264871	0.0351834	ENSMUSG00000019428, ENSMUSG00000024897, ENSMUSG00000038253, ENSMUSG00000040268, ENSMUSG00000058454, ENSMUSG00000027678, ENSMUSG00000020918, ENSMUSG00000001761, ENSMUSG00000030519, ENSMUSG00000039662, ENSMUSG00000028718, ENSMUSG00000024811, ENSMUSG00000041147, ENSMUSG00000003282, ENSMUSG00000066595, ENSMUSG00000029106, ENSMUSG00000070644, ENSMUSG00000048758, ENSMUSG00000059552, ENSMUSG00000003549,…	5884	39	13588	1.42112	1	0.362299	49.6233
GOTERM_BP_FAT	GO:0008366~axon ensheathment	24	0.264871	0.0351834	ENSMUSG00000031985, ENSMUSG00000062078, ENSMUSG00000020716, ENSMUSG00000034593, ENSMUSG00000036098, ENSMUSG00000025232, ENSMUSG00000018217, ENSMUSG00000030342, ENSMUSG00000025203, ENSMUSG00000026812, ENSMUSG00000002603, ENSMUSG00000019843, ENSMUSG00000029145, ENSMUSG00000025402, ENSMUSG00000039830, ENSMUSG00000024527, ENSMUSG00000037868, ENSMUSG00000021665, ENSMUSG00000022982, ENSMUSG00000004788,…	5884	39	13588	1.42112	1	0.362299	49.6233
GOTERM_BP_FAT	GO:0022411~cellular component disassembly	24	0.264871	0.0351834	ENSMUSG00000016510, ENSMUSG00000028974, ENSMUSG00000024360, ENSMUSG00000019774, ENSMUSG00000018858, ENSMUSG00000020745, ENSMUSG00000047635, ENSMUSG00000003873, ENSMUSG00000033222, ENSMUSG00000028832, ENSMUSG00000031628, ENSMUSG00000021666, ENSMUSG00000022973, ENSMUSG00000022982, ENSMUSG00000027433, ENSMUSG00000019979, ENSMUSG00000019988, ENSMUSG00000015337, ENSMUSG00000029027, ENSMUSG00000026803,…	5884	39	13588	1.42112	1	0.362299	49.6233
GOTERM_BP_FAT	GO:0007272~ensheathment of neurons	24	0.264871	0.0351834	ENSMUSG00000031985, ENSMUSG00000062078, ENSMUSG00000020716, ENSMUSG00000034593, ENSMUSG00000036098, ENSMUSG00000025232, ENSMUSG00000018217, ENSMUSG00000030342, ENSMUSG00000025203, ENSMUSG00000026812, ENSMUSG00000002603, ENSMUSG00000019843, ENSMUSG00000029145, ENSMUSG00000025402, ENSMUSG00000039830, ENSMUSG00000024527, ENSMUSG00000037868, ENSMUSG00000021665, ENSMUSG00000022982, ENSMUSG00000004788,…	5884	39	13588	1.42112	1	0.362299	49.6233
GOTERM_BP_FAT	GO:0051247~positive regulation of protein metabolic process	58	0.640106	0.0359241	ENSMUSG00000024425, ENSMUSG00000064030, ENSMUSG00000002603, ENSMUSG00000018501, ENSMUSG00000032216, ENSMUSG00000050192, ENSMUSG00000034384, ENSMUSG00000019927, ENSMUSG00000052155, ENSMUSG00000042303, ENSMUSG00000066551, ENSMUSG00000029468, ENSMUSG00000067336, ENSMUSG00000027358, ENSMUSG00000030122, ENSMUSG00000031555, ENSMUSG00000006728, ENSMUSG00000050310, ENSMUSG00000026483, ENSMUSG00000027598,…	5884	109	13588	1.22881	1	0.367733	50.3585
GOTERM_BP_FAT	GO:0006400~tRNA modification	12	0.132436	0.0360034	ENSMUSG00000032342, ENSMUSG00000007610, ENSMUSG00000022704, ENSMUSG00000069020, ENSMUSG00000029507, ENSMUSG00000060950, ENSMUSG00000074576, ENSMUSG00000006732, ENSMUSG00000002825, ENSMUSG00000027487, ENSMUSG00000024037, ENSMUSG00000049482	5884	16	13588	1.73199	1	0.367698	50.4366
GOTERM_BP_FAT	GO:0001836~release of cytochrome c from mitochondria	12	0.132436	0.0360034	ENSMUSG00000031628, ENSMUSG00000002797, ENSMUSG00000004446, ENSMUSG00000025076, ENSMUSG00000006818, ENSMUSG00000002083, ENSMUSG00000003438, ENSMUSG00000029026, ENSMUSG00000007659, ENSMUSG00000003873, ENSMUSG00000059552, ENSMUSG00000022346	5884	16	13588	1.73199	1	0.367698	50.4366
GOTERM_BP_FAT	GO:0050810~regulation of steroid biosynthetic process	12	0.132436	0.0360034	ENSMUSG00000020538, ENSMUSG00000045294, ENSMUSG00000033161, ENSMUSG00000040374, ENSMUSG00000032131, ENSMUSG00000024030, ENSMUSG00000022982, ENSMUSG00000003721, ENSMUSG00000024431, ENSMUSG00000032485, ENSMUSG00000024949, ENSMUSG00000023000	5884	16	13588	1.73199	1	0.367698	50.4366
GOTERM_BP_FAT	GO:0051270~regulation of cell motion	57	0.62907	0.0366841	ENSMUSG00000003031, ENSMUSG00000061353, ENSMUSG00000021109, ENSMUSG00000031714, ENSMUSG00000038387, ENSMUSG00000000489, ENSMUSG00000055723, ENSMUSG00000032259, ENSMUSG00000021823, ENSMUSG00000032494, ENSMUSG00000027314, ENSMUSG00000066551, ENSMUSG00000013663, ENSMUSG00000020689, ENSMUSG00000052593, ENSMUSG00000001435, ENSMUSG00000055980, ENSMUSG00000058587, ENSMUSG00000015647, ENSMUSG00000020902,…	5884	107	13588	1.23019	1	0.372565	51.1023
GOTERM_BP_FAT	GO:0001822~kidney development	57	0.62907	0.0366841	ENSMUSG00000007613, ENSMUSG00000027381, ENSMUSG00000048482, ENSMUSG00000046714, ENSMUSG00000015619, ENSMUSG00000028344, ENSMUSG00000030110, ENSMUSG00000027253, ENSMUSG00000037992, ENSMUSG00000025921, ENSMUSG00000042797, ENSMUSG00000048402, ENSMUSG00000048616, ENSMUSG00000019971, ENSMUSG00000001504, ENSMUSG00000029994, ENSMUSG00000027358, ENSMUSG00000056962, ENSMUSG00000061393, ENSMUSG00000015647,…	5884	107	13588	1.23019	1	0.372565	51.1023
GOTERM_BP_FAT	GO:0003001~generation of a signal involved in cell-cell signaling	46	0.50767	0.0367764	ENSMUSG00000024897, ENSMUSG00000022568, ENSMUSG00000021071, ENSMUSG00000034593, ENSMUSG00000037386, ENSMUSG00000048482, ENSMUSG00000029071, ENSMUSG00000001018, ENSMUSG00000032872, ENSMUSG00000004113, ENSMUSG00000018604, ENSMUSG00000031668, ENSMUSG00000033615, ENSMUSG00000022973, ENSMUSG00000040488, ENSMUSG00000027882, ENSMUSG00000063887, ENSMUSG00000027273, ENSMUSG00000047259, ENSMUSG00000061601,…	5884	84	13588	1.26462	1	0.372626	51.1919
GOTERM_BP_FAT	GO:0006897~endocytosis	95	1.04845	0.0368246	ENSMUSG00000040276, ENSMUSG00000039361, ENSMUSG00000020476, ENSMUSG00000020375, ENSMUSG00000024924, ENSMUSG00000029512, ENSMUSG00000015053, ENSMUSG00000015653, ENSMUSG00000066151, ENSMUSG00000022999, ENSMUSG00000027253, ENSMUSG00000028488, ENSMUSG00000017670, ENSMUSG00000022957, ENSMUSG00000041112, ENSMUSG00000022602, ENSMUSG00000036103, ENSMUSG00000027257, ENSMUSG00000024772, ENSMUSG00000052298,…	5884	188	13588	1.16694	1	0.372329	51.2387
GOTERM_BP_FAT	GO:0010324~membrane invagination	95	1.04845	0.0368246	ENSMUSG00000040276, ENSMUSG00000039361, ENSMUSG00000020476, ENSMUSG00000020375, ENSMUSG00000024924, ENSMUSG00000029512, ENSMUSG00000015053, ENSMUSG00000015653, ENSMUSG00000066151, ENSMUSG00000022999, ENSMUSG00000027253, ENSMUSG00000028488, ENSMUSG00000017670, ENSMUSG00000022957, ENSMUSG00000041112, ENSMUSG00000022602, ENSMUSG00000036103, ENSMUSG00000027257, ENSMUSG00000024772, ENSMUSG00000052298,…	5884	188	13588	1.16694	1	0.372329	51.2387
GOTERM_BP_FAT	GO:0007267~cell-cell signaling	142	1.56716	0.0370788	ENSMUSG00000021071, ENSMUSG00000001018, ENSMUSG00000025892, ENSMUSG00000022594, ENSMUSG00000032259, ENSMUSG00000042388, ENSMUSG00000003279, ENSMUSG00000035200, ENSMUSG00000047259, ENSMUSG00000033768, ENSMUSG00000055980, ENSMUSG00000061393, ENSMUSG00000019433, ENSMUSG00000028161, ENSMUSG00000030849, ENSMUSG00000020402, ENSMUSG00000021448, ENSMUSG00000029503, ENSMUSG00000005320, ENSMUSG00000025889,…	5884	290	13588	1.13077	1	0.373694	51.4844
GOTERM_BP_FAT	GO:0060541~respiratory system development	65	0.71736	0.0374803	ENSMUSG00000078970, ENSMUSG00000040385, ENSMUSG00000026124, ENSMUSG00000022843, ENSMUSG00000045216, ENSMUSG00000000416, ENSMUSG00000025921, ENSMUSG00000025856, ENSMUSG00000037169, ENSMUSG00000029231, ENSMUSG00000066551, ENSMUSG00000048402, ENSMUSG00000030067, ENSMUSG00000026923, ENSMUSG00000067336, ENSMUSG00000056962, ENSMUSG00000061393, ENSMUSG00000036545, ENSMUSG00000015647, ENSMUSG00000031591,…	5884	124	13588	1.21053	1	0.376231	51.8702
GOTERM_BP_FAT	GO:0007178~transmembrane receptor protein serine/threonine kinase signaling pathway	43	0.474561	0.0388074	ENSMUSG00000033837, ENSMUSG00000007613, ENSMUSG00000046058, ENSMUSG00000066839, ENSMUSG00000002603, ENSMUSG00000039615, ENSMUSG00000000489, ENSMUSG00000036986, ENSMUSG00000031010, ENSMUSG00000002384, ENSMUSG00000027784, ENSMUSG00000032402, ENSMUSG00000040488, ENSMUSG00000052155, ENSMUSG00000032812, ENSMUSG00000036867, ENSMUSG00000008999, ENSMUSG00000025856, ENSMUSG00000020315, ENSMUSG00000059552,…	5884	78	13588	1.27308	1	0.386075	53.1247
GOTERM_BP_FAT	GO:0019725~cellular homeostasis	166	1.83203	0.0390728	ENSMUSG00000025968, ENSMUSG00000021072, ENSMUSG00000070425, ENSMUSG00000033585, ENSMUSG00000025203, ENSMUSG00000032583, ENSMUSG00000021109, ENSMUSG00000018196, ENSMUSG00000022844, ENSMUSG00000025823, ENSMUSG00000025402, ENSMUSG00000028843, ENSMUSG00000031584, ENSMUSG00000037868, ENSMUSG00000025408, ENSMUSG00000021313, ENSMUSG00000042797, ENSMUSG00000035200, ENSMUSG00000031068, ENSMUSG00000001985,…	5884	343	13588	1.11763	1	0.387462	53.3719
GOTERM_BP_FAT	GO:0048870~cell motility	139	1.53405	0.039585	ENSMUSG00000025969, ENSMUSG00000033585, ENSMUSG00000021109, ENSMUSG00000030110, ENSMUSG00000022122, ENSMUSG00000029512, ENSMUSG00000000489, ENSMUSG00000038793, ENSMUSG00000032259, ENSMUSG00000009621, ENSMUSG00000027967, ENSMUSG00000034384, ENSMUSG00000021822, ENSMUSG00000020121, ENSMUSG00000020122, ENSMUSG00000005069, ENSMUSG00000027111, ENSMUSG00000022443, ENSMUSG00000001507, ENSMUSG00000019433,…	5884	284	13588	1.13026	1	0.390763	53.8454
GOTERM_BP_FAT	GO:0051674~localization of cell	139	1.53405	0.039585	ENSMUSG00000025969, ENSMUSG00000033585, ENSMUSG00000021109, ENSMUSG00000030110, ENSMUSG00000022122, ENSMUSG00000029512, ENSMUSG00000000489, ENSMUSG00000038793, ENSMUSG00000032259, ENSMUSG00000009621, ENSMUSG00000027967, ENSMUSG00000034384, ENSMUSG00000021822, ENSMUSG00000020121, ENSMUSG00000020122, ENSMUSG00000005069, ENSMUSG00000027111, ENSMUSG00000022443, ENSMUSG00000001507, ENSMUSG00000019433,…	5884	284	13588	1.13026	1	0.390763	53.8454
GOTERM_BP_FAT	GO:0012502~induction of programmed cell death	85	0.938086	0.0397037	ENSMUSG00000007613, ENSMUSG00000005370, ENSMUSG00000005510, ENSMUSG00000048756, ENSMUSG00000029433, ENSMUSG00000008730, ENSMUSG00000028907, ENSMUSG00000017146, ENSMUSG00000051234, ENSMUSG00000034974, ENSMUSG00000028282, ENSMUSG00000019975, ENSMUSG00000053175, ENSMUSG00000028443, ENSMUSG00000019979, ENSMUSG00000032498, ENSMUSG00000051413, ENSMUSG00000013663, ENSMUSG00000024399, ENSMUSG00000024959,…	5884	167	13588	1.1754	1	0.390986	53.9544
GOTERM_BP_FAT	GO:0006917~induction of apoptosis	85	0.938086	0.0397037	ENSMUSG00000007613, ENSMUSG00000005370, ENSMUSG00000005510, ENSMUSG00000048756, ENSMUSG00000029433, ENSMUSG00000008730, ENSMUSG00000028907, ENSMUSG00000017146, ENSMUSG00000051234, ENSMUSG00000034974, ENSMUSG00000028282, ENSMUSG00000019975, ENSMUSG00000053175, ENSMUSG00000028443, ENSMUSG00000019979, ENSMUSG00000032498, ENSMUSG00000051413, ENSMUSG00000013663, ENSMUSG00000024399, ENSMUSG00000024959,…	5884	167	13588	1.1754	1	0.390986	53.9544
GOTERM_BP_FAT	GO:0032481~positive regulation of type I interferon production	8	0.0882905	0.0397953	ENSMUSG00000037523, ENSMUSG00000047123, ENSMUSG00000035834, ENSMUSG00000027427, ENSMUSG00000040296, ENSMUSG00000034453, ENSMUSG00000028099, ENSMUSG00000025980	5884	9	13588	2.05272	1	0.390998	54.0384
GOTERM_BP_FAT	GO:0006743~ubiquinone metabolic process	8	0.0882905	0.0397953	ENSMUSG00000038240, ENSMUSG00000031782, ENSMUSG00000029319, ENSMUSG00000021235, ENSMUSG00000026784, ENSMUSG00000030652, ENSMUSG00000026798, ENSMUSG00000041733	5884	9	13588	2.05272	1	0.390998	54.0384
GOTERM_BP_FAT	GO:0006744~ubiquinone biosynthetic process	8	0.0882905	0.0397953	ENSMUSG00000038240, ENSMUSG00000031782, ENSMUSG00000029319, ENSMUSG00000021235, ENSMUSG00000026784, ENSMUSG00000030652, ENSMUSG00000026798, ENSMUSG00000041733	5884	9	13588	2.05272	1	0.390998	54.0384
GOTERM_BP_FAT	GO:0032269~negative regulation of cellular protein metabolic process	40	0.441452	0.0408602	ENSMUSG00000020091, ENSMUSG00000052684, ENSMUSG00000024423, ENSMUSG00000029613, ENSMUSG00000044303, ENSMUSG00000021149, ENSMUSG00000039515, ENSMUSG00000019773, ENSMUSG00000026511, ENSMUSG00000020849, ENSMUSG00000045896, ENSMUSG00000028842, ENSMUSG00000009549, ENSMUSG00000038160, ENSMUSG00000052707, ENSMUSG00000025469, ENSMUSG00000004768, ENSMUSG00000050965, ENSMUSG00000031668, ENSMUSG00000021948,…	5884	72	13588	1.28295	1	0.39849	55.0045
GOTERM_BP_FAT	GO:0006342~chromatin silencing	14	0.154508	0.0419309	ENSMUSG00000020661, ENSMUSG00000025138, ENSMUSG00000020063, ENSMUSG00000027018, ENSMUSG00000035478, ENSMUSG00000027478, ENSMUSG00000031715, ENSMUSG00000025578, ENSMUSG00000020390, ENSMUSG00000040054, ENSMUSG00000029524, ENSMUSG00000025486, ENSMUSG00000034748, ENSMUSG00000032187	5884	20	13588	1.61652	1	0.405908	55.9563
GOTERM_BP_FAT	GO:0006887~exocytosis	58	0.640106	0.0437186	ENSMUSG00000053841, ENSMUSG00000021071, ENSMUSG00000070425, ENSMUSG00000001018, ENSMUSG00000053799, ENSMUSG00000040722, ENSMUSG00000029434, ENSMUSG00000015653, ENSMUSG00000021357, ENSMUSG00000020536, ENSMUSG00000038453, ENSMUSG00000023393, ENSMUSG00000020782, ENSMUSG00000019066, ENSMUSG00000030805, ENSMUSG00000029468, ENSMUSG00000074030, ENSMUSG00000033769, ENSMUSG00000034656, ENSMUSG00000020900,…	5884	110	13588	1.21764	1	0.41852	57.5032
GOTERM_BP_FAT	GO:0045814~negative regulation of gene expression, epigenetic	15	0.165545	0.0440407	ENSMUSG00000020661, ENSMUSG00000025138, ENSMUSG00000020063, ENSMUSG00000027018, ENSMUSG00000035478, ENSMUSG00000027478, ENSMUSG00000031715, ENSMUSG00000025578, ENSMUSG00000020390, ENSMUSG00000021326, ENSMUSG00000040054, ENSMUSG00000029524, ENSMUSG00000025486, ENSMUSG00000034748, ENSMUSG00000032187	5884	22	13588	1.57453	1	0.420166	57.7763
GOTERM_BP_FAT	GO:0070585~protein localization in mitochondrion	15	0.165545	0.0440407	ENSMUSG00000029198, ENSMUSG00000030882, ENSMUSG00000004446, ENSMUSG00000039016, ENSMUSG00000020219, ENSMUSG00000064068, ENSMUSG00000021079, ENSMUSG00000024580, ENSMUSG00000078713, ENSMUSG00000002984, ENSMUSG00000029020, ENSMUSG00000027099, ENSMUSG00000027076, ENSMUSG00000030316, ENSMUSG00000024847	5884	22	13588	1.57453	1	0.420166	57.7763
GOTERM_BP_FAT	GO:0021587~cerebellum morphogenesis	15	0.165545	0.0440407	ENSMUSG00000031985, ENSMUSG00000025223, ENSMUSG00000052957, ENSMUSG00000034656, ENSMUSG00000038765, ENSMUSG00000021557, ENSMUSG00000001761, ENSMUSG00000029512, ENSMUSG00000030302, ENSMUSG00000028519, ENSMUSG00000032238, ENSMUSG00000029595, ENSMUSG00000020037, ENSMUSG00000048402, ENSMUSG00000028969	5884	22	13588	1.57453	1	0.420166	57.7763
GOTERM_BP_FAT	GO:0006626~protein targeting to mitochondrion	15	0.165545	0.0440407	ENSMUSG00000029198, ENSMUSG00000030882, ENSMUSG00000004446, ENSMUSG00000039016, ENSMUSG00000020219, ENSMUSG00000064068, ENSMUSG00000021079, ENSMUSG00000024580, ENSMUSG00000078713, ENSMUSG00000002984, ENSMUSG00000029020, ENSMUSG00000027099, ENSMUSG00000027076, ENSMUSG00000030316, ENSMUSG00000024847	5884	22	13588	1.57453	1	0.420166	57.7763
GOTERM_BP_FAT	GO:0034599~cellular response to oxidative stress	15	0.165545	0.0440407	ENSMUSG00000075706, ENSMUSG00000028691, ENSMUSG00000021109, ENSMUSG00000005161, ENSMUSG00000025140, ENSMUSG00000027187, ENSMUSG00000024095, ENSMUSG00000024997, ENSMUSG00000021461, ENSMUSG00000024140, ENSMUSG00000025889, ENSMUSG00000063856, ENSMUSG00000067847, ENSMUSG00000020250, ENSMUSG00000006818, ENSMUSG00000022982	5884	22	13588	1.57453	1	0.420166	57.7763
GOTERM_BP_FAT	GO:0046890~regulation of lipid biosynthetic process	15	0.165545	0.0440407	ENSMUSG00000005373, ENSMUSG00000040374, ENSMUSG00000033161, ENSMUSG00000003721, ENSMUSG00000024431, ENSMUSG00000024949, ENSMUSG00000017146, ENSMUSG00000023000, ENSMUSG00000020538, ENSMUSG00000045294, ENSMUSG00000032131, ENSMUSG00000024030, ENSMUSG00000022982, ENSMUSG00000037622, ENSMUSG00000032485	5884	22	13588	1.57453	1	0.420166	57.7763
GOTERM_BP_FAT	GO:0006612~protein targeting to membrane	15	0.165545	0.0440407	ENSMUSG00000030882, ENSMUSG00000039016, ENSMUSG00000020219, ENSMUSG00000026511, ENSMUSG00000030654, ENSMUSG00000021079, ENSMUSG00000009549, ENSMUSG00000028649, ENSMUSG00000027828, ENSMUSG00000014504, ENSMUSG00000036323, ENSMUSG00000020882, ENSMUSG00000067825, ENSMUSG00000027076, ENSMUSG00000032042	5884	22	13588	1.57453	1	0.420166	57.7763
GOTERM_BP_FAT	GO:0017148~negative regulation of translation	15	0.165545	0.0440407	ENSMUSG00000052707, ENSMUSG00000020091, ENSMUSG00000029613, ENSMUSG00000031490, ENSMUSG00000036698, ENSMUSG00000031668, ENSMUSG00000071337, ENSMUSG00000042500, ENSMUSG00000026511, ENSMUSG00000045896, ENSMUSG00000072115, ENSMUSG00000041530, ENSMUSG00000028842, ENSMUSG00000024483, ENSMUSG00000009549	5884	22	13588	1.57453	1	0.420166	57.7763
GOTERM_BP_FAT	GO:0019827~stem cell maintenance	15	0.165545	0.0440407	ENSMUSG00000021796, ENSMUSG00000037171, ENSMUSG00000031540, ENSMUSG00000021255, ENSMUSG00000050917, ENSMUSG00000022521, ENSMUSG00000005871, ENSMUSG00000003032, ENSMUSG00000024406, ENSMUSG00000012396, ENSMUSG00000074637, ENSMUSG00000041359, ENSMUSG00000036202, ENSMUSG00000034610, ENSMUSG00000029646	5884	22	13588	1.57453	1	0.420166	57.7763
GOTERM_BP_FAT	GO:0044275~cellular carbohydrate catabolic process	34	0.375235	0.0448662	ENSMUSG00000021748, ENSMUSG00000032294, ENSMUSG00000021913, ENSMUSG00000028961, ENSMUSG00000063229, ENSMUSG00000004267, ENSMUSG00000033065, ENSMUSG00000025579, ENSMUSG00000028980, ENSMUSG00000020456, ENSMUSG00000053604, ENSMUSG00000031807, ENSMUSG00000057666, ENSMUSG00000025236, ENSMUSG00000024959, ENSMUSG00000011752, ENSMUSG00000022536, ENSMUSG00000020321, ENSMUSG00000000628, ENSMUSG00000029776,…	5884	60	13588	1.30861	1	0.425468	58.4689
GOTERM_BP_FAT	GO:0032844~regulation of homeostatic process	34	0.375235	0.0448662	ENSMUSG00000020866, ENSMUSG00000036098, ENSMUSG00000064796, ENSMUSG00000025223, ENSMUSG00000048756, ENSMUSG00000021109, ENSMUSG00000002603, ENSMUSG00000023951, ENSMUSG00000047139, ENSMUSG00000031668, ENSMUSG00000021647, ENSMUSG00000021313, ENSMUSG00000026155, ENSMUSG00000031921, ENSMUSG00000031808, ENSMUSG00000017697, ENSMUSG00000047259, ENSMUSG00000052593, ENSMUSG00000020716, ENSMUSG00000029468,…	5884	60	13588	1.30861	1	0.425468	58.4689
GOTERM_BP_FAT	GO:0007093~mitotic cell cycle checkpoint	16	0.176581	0.0457038	ENSMUSG00000070348, ENSMUSG00000019942, ENSMUSG00000020413, ENSMUSG00000032400, ENSMUSG00000034218, ENSMUSG00000028224, ENSMUSG00000036986, ENSMUSG00000043991, ENSMUSG00000024537, ENSMUSG00000005871, ENSMUSG00000059552, ENSMUSG00000028495, ENSMUSG00000045482, ENSMUSG00000042903, ENSMUSG00000014668, ENSMUSG00000022601	5884	24	13588	1.53954	1	0.43079	59.1605
GOTERM_BP_FAT	GO:0032200~telomere organization	16	0.176581	0.0457038	ENSMUSG00000064796, ENSMUSG00000025925, ENSMUSG00000026496, ENSMUSG00000038685, ENSMUSG00000030528, ENSMUSG00000028224, ENSMUSG00000022672, ENSMUSG00000032410, ENSMUSG00000024811, ENSMUSG00000038000, ENSMUSG00000038290, ENSMUSG00000041346, ENSMUSG00000024174, ENSMUSG00000021958, ENSMUSG00000029676, ENSMUSG00000031921	5884	24	13588	1.53954	1	0.43079	59.1605
GOTERM_BP_FAT	GO:0030178~negative regulation of Wnt receptor signaling pathway	17	0.187617	0.0469931	ENSMUSG00000053754, ENSMUSG00000040249, ENSMUSG00000070348, ENSMUSG00000004637, ENSMUSG00000020218, ENSMUSG00000025902, ENSMUSG00000074637, ENSMUSG00000030772, ENSMUSG00000027004, ENSMUSG00000027253, ENSMUSG00000021974, ENSMUSG00000042901, ENSMUSG00000005871, ENSMUSG00000040158, ENSMUSG00000032717, ENSMUSG00000038805, ENSMUSG00000024182	5884	26	13588	1.50994	1	0.439246	60.2039
GOTERM_BP_FAT	GO:0051495~positive regulation of cytoskeleton organization	17	0.187617	0.0469931	ENSMUSG00000028991, ENSMUSG00000010175, ENSMUSG00000003031, ENSMUSG00000021754, ENSMUSG00000068744, ENSMUSG00000022770, ENSMUSG00000050310, ENSMUSG00000018411, ENSMUSG00000024142, ENSMUSG00000044042, ENSMUSG00000005871, ENSMUSG00000043079, ENSMUSG00000025758, ENSMUSG00000000416, ENSMUSG00000056201, ENSMUSG00000007815, ENSMUSG00000015932	5884	26	13588	1.50994	1	0.439246	60.2039
GOTERM_BP_FAT	GO:0060603~mammary gland duct morphogenesis	17	0.187617	0.0469931	ENSMUSG00000022568, ENSMUSG00000004264, ENSMUSG00000027678, ENSMUSG00000025217, ENSMUSG00000002603, ENSMUSG00000030849, ENSMUSG00000021994, ENSMUSG00000024431, ENSMUSG00000027646, ENSMUSG00000036986, ENSMUSG00000018604, ENSMUSG00000031870, ENSMUSG00000021466, ENSMUSG00000017724, ENSMUSG00000003534, ENSMUSG00000018160, ENSMUSG00000048402	5884	26	13588	1.50994	1	0.439246	60.2039
GOTERM_BP_FAT	GO:0034976~response to endoplasmic reticulum stress	17	0.187617	0.0469931	ENSMUSG00000070348, ENSMUSG00000024079, ENSMUSG00000040462, ENSMUSG00000046062, ENSMUSG00000020715, ENSMUSG00000022812, ENSMUSG00000026864, ENSMUSG00000078622, ENSMUSG00000021669, ENSMUSG00000026483, ENSMUSG00000025408, ENSMUSG00000031668, ENSMUSG00000015839, ENSMUSG00000027808, ENSMUSG00000059552, ENSMUSG00000040435, ENSMUSG00000022365	5884	26	13588	1.50994	1	0.439246	60.2039
GOTERM_BP_FAT	GO:0042063~gliogenesis	30	0.331089	0.0472343	ENSMUSG00000036098, ENSMUSG00000033006, ENSMUSG00000020052, ENSMUSG00000033585, ENSMUSG00000018166, ENSMUSG00000035187, ENSMUSG00000025402, ENSMUSG00000037868, ENSMUSG00000019803, ENSMUSG00000027434, ENSMUSG00000004788, ENSMUSG00000036766, ENSMUSG00000041309, ENSMUSG00000028969, ENSMUSG00000032187, ENSMUSG00000026923, ENSMUSG00000020716, ENSMUSG00000028683, ENSMUSG00000029603, ENSMUSG00000053398,…	5884	52	13588	1.3323	1	0.440211	60.3962
GOTERM_BP_FAT	GO:0010638~positive regulation of organelle organization	30	0.331089	0.0472343	ENSMUSG00000064796, ENSMUSG00000003031, ENSMUSG00000002603, ENSMUSG00000018501, ENSMUSG00000036986, ENSMUSG00000024947, ENSMUSG00000018411, ENSMUSG00000044042, ENSMUSG00000005871, ENSMUSG00000043079, ENSMUSG00000005732, ENSMUSG00000025758, ENSMUSG00000000416, ENSMUSG00000059552, ENSMUSG00000031921, ENSMUSG00000057113, ENSMUSG00000028991, ENSMUSG00000010175, ENSMUSG00000024399, ENSMUSG00000021754,…	5884	52	13588	1.3323	1	0.440211	60.3962
GOTERM_BP_FAT	GO:0052548~regulation of endopeptidase activity	29	0.320053	0.0477501	ENSMUSG00000029433, ENSMUSG00000036986, ENSMUSG00000051234, ENSMUSG00000024947, ENSMUSG00000041241, ENSMUSG00000028282, ENSMUSG00000029547, ENSMUSG00000031668, ENSMUSG00000024012, ENSMUSG00000019979, ENSMUSG00000059552, ENSMUSG00000021576, ENSMUSG00000022346, ENSMUSG00000024959, ENSMUSG00000028914, ENSMUSG00000003873, ENSMUSG00000034485, ENSMUSG00000062203, ENSMUSG00000039959, ENSMUSG00000063694,…	5884	50	13588	1.3394	1	0.443096	60.8047
GOTERM_BP_FAT	GO:0010769~regulation of cell morphogenesis involved in differentiation	29	0.320053	0.0477501	ENSMUSG00000040785, ENSMUSG00000029634, ENSMUSG00000029516, ENSMUSG00000029512, ENSMUSG00000018411, ENSMUSG00000028664, ENSMUSG00000034384, ENSMUSG00000020458, ENSMUSG00000021451, ENSMUSG00000022607, ENSMUSG00000027394, ENSMUSG00000034656, ENSMUSG00000053646, ENSMUSG00000029287, ENSMUSG00000068327, ENSMUSG00000020902, ENSMUSG00000018965, ENSMUSG00000021253, ENSMUSG00000002489, ENSMUSG00000022055,…	5884	50	13588	1.3394	1	0.443096	60.8047
GOTERM_BP_FAT	GO:0043281~regulation of caspase activity	29	0.320053	0.0477501	ENSMUSG00000029433, ENSMUSG00000036986, ENSMUSG00000051234, ENSMUSG00000024947, ENSMUSG00000041241, ENSMUSG00000028282, ENSMUSG00000029547, ENSMUSG00000031668, ENSMUSG00000024012, ENSMUSG00000019979, ENSMUSG00000059552, ENSMUSG00000021576, ENSMUSG00000022346, ENSMUSG00000024959, ENSMUSG00000028914, ENSMUSG00000003873, ENSMUSG00000034485, ENSMUSG00000062203, ENSMUSG00000039959, ENSMUSG00000063694,…	5884	50	13588	1.3394	1	0.443096	60.8047
GOTERM_BP_FAT	GO:0009894~regulation of catabolic process	29	0.320053	0.0477501	ENSMUSG00000024425, ENSMUSG00000020227, ENSMUSG00000005373, ENSMUSG00000032540, ENSMUSG00000055116, ENSMUSG00000024927, ENSMUSG00000039615, ENSMUSG00000051675, ENSMUSG00000001729, ENSMUSG00000026229, ENSMUSG00000042429, ENSMUSG00000058709, ENSMUSG00000032216, ENSMUSG00000059003, ENSMUSG00000005871, ENSMUSG00000042303, ENSMUSG00000066551, ENSMUSG00000017221, ENSMUSG00000028991, ENSMUSG00000025509,…	5884	50	13588	1.3394	1	0.443096	60.8047
GOTERM_BP_FAT	GO:0051345~positive regulation of hydrolase activity	44	0.485598	0.0479055	ENSMUSG00000022568, ENSMUSG00000045875, ENSMUSG00000039515, ENSMUSG00000046159, ENSMUSG00000029433, ENSMUSG00000032540, ENSMUSG00000036986, ENSMUSG00000051234, ENSMUSG00000024947, ENSMUSG00000041241, ENSMUSG00000032259, ENSMUSG00000040016, ENSMUSG00000028282, ENSMUSG00000031668, ENSMUSG00000019979, ENSMUSG00000024012, ENSMUSG00000029064, ENSMUSG00000059552, ENSMUSG00000021576, ENSMUSG00000034792,…	5884	81	13588	1.25444	1	0.443445	60.9269
GOTERM_BP_FAT	GO:0051896~regulation of protein kinase B signaling cascade	9	0.0993268	0.0480731	ENSMUSG00000050310, ENSMUSG00000032259, ENSMUSG00000022957, ENSMUSG00000063856, ENSMUSG00000003068, ENSMUSG00000002496, ENSMUSG00000041801, ENSMUSG00000013663, ENSMUSG00000005533	5884	11	13588	1.88944	1	0.443877	61.0584
GOTERM_BP_FAT	GO:0030035~microspike assembly	9	0.0993268	0.0480731	ENSMUSG00000018126, ENSMUSG00000020758, ENSMUSG00000022788, ENSMUSG00000038859, ENSMUSG00000030428, ENSMUSG00000025372, ENSMUSG00000033763, ENSMUSG00000022353, ENSMUSG00000027111	5884	11	13588	1.88944	1	0.443877	61.0584
GOTERM_BP_FAT	GO:0046488~phosphatidylinositol metabolic process	9	0.0993268	0.0480731	ENSMUSG00000040430, ENSMUSG00000037706, ENSMUSG00000025417, ENSMUSG00000018547, ENSMUSG00000025949, ENSMUSG00000026737, ENSMUSG00000028126, ENSMUSG00000034902, ENSMUSG00000024867	5884	11	13588	1.88944	1	0.443877	61.0584
GOTERM_BP_FAT	GO:0030325~adrenal gland development	9	0.0993268	0.0480731	ENSMUSG00000020716, ENSMUSG00000026751, ENSMUSG00000025056, ENSMUSG00000039910, ENSMUSG00000024431, ENSMUSG00000049796, ENSMUSG00000022587, ENSMUSG00000027239, ENSMUSG00000032083	5884	11	13588	1.88944	1	0.443877	61.0584
GOTERM_BP_FAT	GO:0016575~histone deacetylation	9	0.0993268	0.0480731	ENSMUSG00000028800, ENSMUSG00000006456, ENSMUSG00000062270, ENSMUSG00000040054, ENSMUSG00000020063, ENSMUSG00000062906, ENSMUSG00000029913, ENSMUSG00000019777, ENSMUSG00000024454	5884	11	13588	1.88944	1	0.443877	61.0584
GOTERM_BP_FAT	GO:0034984~cellular response to DNA damage stimulus	9	0.0993268	0.0480731	ENSMUSG00000020380, ENSMUSG00000031928, ENSMUSG00000043909, ENSMUSG00000030254, ENSMUSG00000040629, ENSMUSG00000031575, ENSMUSG00000002221, ENSMUSG00000025374, ENSMUSG00000026439	5884	11	13588	1.88944	1	0.443877	61.0584
GOTERM_BP_FAT	GO:0008354~germ cell migration	9	0.0993268	0.0480731	ENSMUSG00000022672, ENSMUSG00000007613, ENSMUSG00000019966, ENSMUSG00000061353, ENSMUSG00000045382, ENSMUSG00000025809, ENSMUSG00000002603, ENSMUSG00000003873, ENSMUSG00000005672	5884	11	13588	1.88944	1	0.443877	61.0584
GOTERM_BP_FAT	GO:0046823~negative regulation of nucleocytoplasmic transport	9	0.0993268	0.0480731	ENSMUSG00000020716, ENSMUSG00000026196, ENSMUSG00000028367, ENSMUSG00000037313, ENSMUSG00000025231, ENSMUSG00000034485, ENSMUSG00000027499, ENSMUSG00000028969, ENSMUSG00000010517	5884	11	13588	1.88944	1	0.443877	61.0584
GOTERM_BP_FAT	GO:0016236~macroautophagy	9	0.0993268	0.0480731	ENSMUSG00000038160, ENSMUSG00000027244, ENSMUSG00000027602, ENSMUSG00000019969, ENSMUSG00000033124, ENSMUSG00000007891, ENSMUSG00000026289, ENSMUSG00000025907, ENSMUSG00000038295	5884	11	13588	1.88944	1	0.443877	61.0584
GOTERM_BP_FAT	GO:0048167~regulation of synaptic plasticity	28	0.309017	0.0482229	ENSMUSG00000023845, ENSMUSG00000033577, ENSMUSG00000020716, ENSMUSG00000048482, ENSMUSG00000030265, ENSMUSG00000028833, ENSMUSG00000019433, ENSMUSG00000030103, ENSMUSG00000026797, ENSMUSG00000025586, ENSMUSG00000030209, ENSMUSG00000027071, ENSMUSG00000032336, ENSMUSG00000032259, ENSMUSG00000042429, ENSMUSG00000030302, ENSMUSG00000037868, ENSMUSG00000025889, ENSMUSG00000028664, ENSMUSG00000032356,…	5884	48	13588	1.3471	1	0.444184	61.1756
GOTERM_BP_FAT	GO:0010001~glial cell differentiation	28	0.309017	0.0482229	ENSMUSG00000036098, ENSMUSG00000033006, ENSMUSG00000020052, ENSMUSG00000018166, ENSMUSG00000035187, ENSMUSG00000025402, ENSMUSG00000037868, ENSMUSG00000027434, ENSMUSG00000004788, ENSMUSG00000036766, ENSMUSG00000041309, ENSMUSG00000028969, ENSMUSG00000032187, ENSMUSG00000026923, ENSMUSG00000020716, ENSMUSG00000028683, ENSMUSG00000029603, ENSMUSG00000053398, ENSMUSG00000029145, ENSMUSG00000039830,…	5884	48	13588	1.3471	1	0.444184	61.1756
GOTERM_BP_FAT	GO:0033157~regulation of intracellular protein transport	19	0.20969	0.0486803	ENSMUSG00000020716, ENSMUSG00000031328, ENSMUSG00000026667, ENSMUSG00000028691, ENSMUSG00000002603, ENSMUSG00000028367, ENSMUSG00000001761, ENSMUSG00000005469, ENSMUSG00000034485, ENSMUSG00000025231, ENSMUSG00000027499, ENSMUSG00000022812, ENSMUSG00000010517, ENSMUSG00000021253, ENSMUSG00000043733, ENSMUSG00000026196, ENSMUSG00000023348, ENSMUSG00000037313, ENSMUSG00000028969	5884	30	13588	1.46257	1	0.446614	61.5312
GOTERM_BP_FAT	GO:0016126~sterol biosynthetic process	19	0.20969	0.0486803	ENSMUSG00000036078, ENSMUSG00000058454, ENSMUSG00000059743, ENSMUSG00000026675, ENSMUSG00000003721, ENSMUSG00000018042, ENSMUSG00000001467, ENSMUSG00000021670, ENSMUSG00000006517, ENSMUSG00000058258, ENSMUSG00000021252, ENSMUSG00000045294, ENSMUSG00000024799, ENSMUSG00000034926, ENSMUSG00000021273, ENSMUSG00000026456, ENSMUSG00000031604, ENSMUSG00000032083, ENSMUSG00000041939	5884	30	13588	1.46257	1	0.446614	61.5312
GOTERM_BP_FAT	GO:0017015~regulation of transforming growth factor beta receptor signaling pathway	19	0.20969	0.0486803	ENSMUSG00000052593, ENSMUSG00000034612, ENSMUSG00000029050, ENSMUSG00000030224, ENSMUSG00000046058, ENSMUSG00000025880, ENSMUSG00000027660, ENSMUSG00000019433, ENSMUSG00000006205, ENSMUSG00000026864, ENSMUSG00000040998, ENSMUSG00000021253, ENSMUSG00000032402, ENSMUSG00000034557, ENSMUSG00000039910, ENSMUSG00000039410, ENSMUSG00000059552, ENSMUSG00000032494, ENSMUSG00000033014	5884	30	13588	1.46257	1	0.446614	61.5312
GOTERM_BP_FAT	GO:0034330~cell junction organization	20	0.220726	0.0491692	ENSMUSG00000031985, ENSMUSG00000020689, ENSMUSG00000055322, ENSMUSG00000021224, ENSMUSG00000030342, ENSMUSG00000044279, ENSMUSG00000009073, ENSMUSG00000056569, ENSMUSG00000037815, ENSMUSG00000047197, ENSMUSG00000000555, ENSMUSG00000031523, ENSMUSG00000028465, ENSMUSG00000029528, ENSMUSG00000033985, ENSMUSG00000026193, ENSMUSG00000005699, ENSMUSG00000026478, ENSMUSG00000037643, ENSMUSG00000022178	5884	32	13588	1.44332	1	0.449241	61.9079
GOTERM_BP_FAT	GO:0006839~mitochondrial transport	25	0.275908	0.0492981	ENSMUSG00000036955, ENSMUSG00000027010, ENSMUSG00000029198, ENSMUSG00000030882, ENSMUSG00000039016, ENSMUSG00000025792, ENSMUSG00000021079, ENSMUSG00000024580, ENSMUSG00000002984, ENSMUSG00000029020, ENSMUSG00000027099, ENSMUSG00000027076, ENSMUSG00000030316, ENSMUSG00000059552, ENSMUSG00000074170, ENSMUSG00000024847, ENSMUSG00000004446, ENSMUSG00000020219, ENSMUSG00000003873, ENSMUSG00000064068,…	5884	42	13588	1.37459	1	0.449389	62.0066
GOTERM_BP_FAT	GO:0006733~oxidoreduction coenzyme metabolic process	23	0.253835	0.0496159	ENSMUSG00000039450, ENSMUSG00000038240, ENSMUSG00000028992, ENSMUSG00000038704, ENSMUSG00000020321, ENSMUSG00000031782, ENSMUSG00000022536, ENSMUSG00000032456, ENSMUSG00000028961, ENSMUSG00000029776, ENSMUSG00000021235, ENSMUSG00000029319, ENSMUSG00000026784, ENSMUSG00000030652, ENSMUSG00000026798, ENSMUSG00000042751, ENSMUSG00000028980, ENSMUSG00000041733, ENSMUSG00000053604, ENSMUSG00000031090,…	5884	38	13588	1.39774	1	0.450823	62.2489
GOTERM_BP_FAT	GO:0031400~negative regulation of protein modification process	23	0.253835	0.0496159	ENSMUSG00000052684, ENSMUSG00000024423, ENSMUSG00000044303, ENSMUSG00000039515, ENSMUSG00000021149, ENSMUSG00000019773, ENSMUSG00000032966, ENSMUSG00000020427, ENSMUSG00000034292, ENSMUSG00000020849, ENSMUSG00000003873, ENSMUSG00000038160, ENSMUSG00000025469, ENSMUSG00000020390, ENSMUSG00000026483, ENSMUSG00000032350, ENSMUSG00000014030, ENSMUSG00000038037, ENSMUSG00000050965, ENSMUSG00000035941,…	5884	38	13588	1.39774	1	0.450823	62.2489
GOTERM_BP_FAT	GO:0048705~skeletal system morphogenesis	67	0.739433	0.0510897	ENSMUSG00000007613, ENSMUSG00000046714, ENSMUSG00000026739, ENSMUSG00000025402, ENSMUSG00000000942, ENSMUSG00000029546, ENSMUSG00000021359, ENSMUSG00000045294, ENSMUSG00000032402, ENSMUSG00000018537, ENSMUSG00000027868, ENSMUSG00000023391, ENSMUSG00000038331, ENSMUSG00000071796, ENSMUSG00000000690, ENSMUSG00000025921, ENSMUSG00000029231, ENSMUSG00000034612, ENSMUSG00000048763, ENSMUSG00000029468,…	5884	130	13588	1.19018	1	0.460029	63.354
GOTERM_BP_FAT	GO:0032940~secretion by cell	93	1.02638	0.0515003	ENSMUSG00000021071, ENSMUSG00000053841, ENSMUSG00000048482, ENSMUSG00000070425, ENSMUSG00000029071, ENSMUSG00000001018, ENSMUSG00000032583, ENSMUSG00000029616, ENSMUSG00000053799, ENSMUSG00000040722, ENSMUSG00000029434, ENSMUSG00000032872, ENSMUSG00000015653, ENSMUSG00000021357, ENSMUSG00000020536, ENSMUSG00000038453, ENSMUSG00000018604, ENSMUSG00000023393, ENSMUSG00000040488, ENSMUSG00000020782,…	5884	186	13588	1.15466	1	0.462028	63.6564
GOTERM_BP_FAT	GO:0009127~purine nucleoside monophosphate biosynthetic process	10	0.110363	0.0543505	ENSMUSG00000015961, ENSMUSG00000027889, ENSMUSG00000062867, ENSMUSG00000026192, ENSMUSG00000022962, ENSMUSG00000020899, ENSMUSG00000029247, ENSMUSG00000017697, ENSMUSG00000027259, ENSMUSG00000027823	5884	13	13588	1.77639	1	0.479926	65.691
GOTERM_BP_FAT	GO:0009168~purine ribonucleoside monophosphate biosynthetic process	10	0.110363	0.0543505	ENSMUSG00000015961, ENSMUSG00000027889, ENSMUSG00000062867, ENSMUSG00000026192, ENSMUSG00000022962, ENSMUSG00000020899, ENSMUSG00000029247, ENSMUSG00000017697, ENSMUSG00000027259, ENSMUSG00000027823	5884	13	13588	1.77639	1	0.479926	65.691
GOTERM_BP_FAT	GO:0000724~double-strand break repair via homologous recombination	10	0.110363	0.0543505	ENSMUSG00000030166, ENSMUSG00000041147, ENSMUSG00000026107, ENSMUSG00000027323, ENSMUSG00000000751, ENSMUSG00000020413, ENSMUSG00000078773, ENSMUSG00000049932, ENSMUSG00000074781, ENSMUSG00000025374	5884	13	13588	1.77639	1	0.479926	65.691
GOTERM_BP_FAT	GO:0000725~recombinational repair	10	0.110363	0.0543505	ENSMUSG00000030166, ENSMUSG00000041147, ENSMUSG00000026107, ENSMUSG00000027323, ENSMUSG00000000751, ENSMUSG00000020413, ENSMUSG00000078773, ENSMUSG00000049932, ENSMUSG00000074781, ENSMUSG00000025374	5884	13	13588	1.77639	1	0.479926	65.691
GOTERM_BP_FAT	GO:0042472~inner ear morphogenesis	37	0.408343	0.0548833	ENSMUSG00000029275, ENSMUSG00000038982, ENSMUSG00000003721, ENSMUSG00000032368, ENSMUSG00000028341, ENSMUSG00000038248, ENSMUSG00000074637, ENSMUSG00000045294, ENSMUSG00000073043, ENSMUSG00000014773, ENSMUSG00000031565, ENSMUSG00000012819, ENSMUSG00000048904, ENSMUSG00000029754, ENSMUSG00000049555, ENSMUSG00000019971, ENSMUSG00000074622, ENSMUSG00000022297, ENSMUSG00000033577, ENSMUSG00000062252,…	5884	67	13588	1.27529	1	0.482591	66.0591
GOTERM_BP_FAT	GO:0043254~regulation of protein complex assembly	36	0.397307	0.0559147	ENSMUSG00000030213, ENSMUSG00000003031, ENSMUSG00000018293, ENSMUSG00000020476, ENSMUSG00000038775, ENSMUSG00000018411, ENSMUSG00000026755, ENSMUSG00000079523, ENSMUSG00000047139, ENSMUSG00000021262, ENSMUSG00000057738, ENSMUSG00000044042, ENSMUSG00000028745, ENSMUSG00000005871, ENSMUSG00000021573, ENSMUSG00000000416, ENSMUSG00000020315, ENSMUSG00000028991, ENSMUSG00000021061, ENSMUSG00000021754,…	5884	65	13588	1.279	1	0.488387	66.7612
GOTERM_BP_FAT	GO:0043534~blood vessel endothelial cell migration	6	0.0662179	0.0583051	ENSMUSG00000033933, ENSMUSG00000063856, ENSMUSG00000037936, ENSMUSG00000022443, ENSMUSG00000015605, ENSMUSG00000032083	5884	6	13588	2.30931	1	0.502509	68.3357
GOTERM_BP_FAT	GO:0007351~tripartite regional subdivision	6	0.0662179	0.0583051	ENSMUSG00000027002, ENSMUSG00000055799, ENSMUSG00000030513, ENSMUSG00000018604, ENSMUSG00000020170, ENSMUSG00000032494	5884	6	13588	2.30931	1	0.502509	68.3357
GOTERM_BP_FAT	GO:0014047~glutamate secretion	6	0.0662179	0.0583051	ENSMUSG00000024897, ENSMUSG00000033577, ENSMUSG00000048482, ENSMUSG00000055254, ENSMUSG00000023192, ENSMUSG00000019433	5884	6	13588	2.30931	1	0.502509	68.3357
GOTERM_BP_FAT	GO:0018196~peptidyl-asparagine modification	6	0.0662179	0.0583051	ENSMUSG00000042747, ENSMUSG00000032437, ENSMUSG00000028757, ENSMUSG00000027642, ENSMUSG00000032116, ENSMUSG00000043998	5884	6	13588	2.30931	1	0.502509	68.3357
GOTERM_BP_FAT	GO:0008595~determination of anterior/posterior axis, embryo	6	0.0662179	0.0583051	ENSMUSG00000027002, ENSMUSG00000055799, ENSMUSG00000030513, ENSMUSG00000018604, ENSMUSG00000020170, ENSMUSG00000032494	5884	6	13588	2.30931	1	0.502509	68.3357
GOTERM_BP_FAT	GO:0003016~respiratory system process	6	0.0662179	0.0583051	ENSMUSG00000038253, ENSMUSG00000068079, ENSMUSG00000024750, ENSMUSG00000031840, ENSMUSG00000028138, ENSMUSG00000025579	5884	6	13588	2.30931	1	0.502509	68.3357
GOTERM_BP_FAT	GO:0046500~S-adenosylmethionine metabolic process	6	0.0662179	0.0583051	ENSMUSG00000019795, ENSMUSG00000002769, ENSMUSG00000042032, ENSMUSG00000021638, ENSMUSG00000053907, ENSMUSG00000021376	5884	6	13588	2.30931	1	0.502509	68.3357
GOTERM_BP_FAT	GO:0007184~SMAD protein nuclear translocation	6	0.0662179	0.0583051	ENSMUSG00000021253, ENSMUSG00000037573, ENSMUSG00000032812, ENSMUSG00000002603, ENSMUSG00000020315, ENSMUSG00000036986	5884	6	13588	2.30931	1	0.502509	68.3357
GOTERM_BP_FAT	GO:0018279~protein amino acid N-linked glycosylation via asparagine	6	0.0662179	0.0583051	ENSMUSG00000042747, ENSMUSG00000032437, ENSMUSG00000028757, ENSMUSG00000027642, ENSMUSG00000032116, ENSMUSG00000043998	5884	6	13588	2.30931	1	0.502509	68.3357
GOTERM_BP_FAT	GO:0006448~regulation of translational elongation	6	0.0662179	0.0583051	ENSMUSG00000050192, ENSMUSG00000029536, ENSMUSG00000026511, ENSMUSG00000078812, ENSMUSG00000030122, ENSMUSG00000009549	5884	6	13588	2.30931	1	0.502509	68.3357
GOTERM_BP_FAT	GO:0051055~negative regulation of lipid biosynthetic process	6	0.0662179	0.0583051	ENSMUSG00000045294, ENSMUSG00000033161, ENSMUSG00000022982, ENSMUSG00000003721, ENSMUSG00000037622, ENSMUSG00000017146	5884	6	13588	2.30931	1	0.502509	68.3357
GOTERM_BP_FAT	GO:0006405~RNA export from nucleus	11	0.121399	0.0590899	ENSMUSG00000010097, ENSMUSG00000008301, ENSMUSG00000039509, ENSMUSG00000022774, ENSMUSG00000028330, ENSMUSG00000028676, ENSMUSG00000001855, ENSMUSG00000019715, ENSMUSG00000075600, ENSMUSG00000036992, ENSMUSG00000057113	5884	15	13588	1.6935	1	0.506541	68.8371
GOTERM_BP_FAT	GO:0009167~purine ribonucleoside monophosphate metabolic process	11	0.121399	0.0590899	ENSMUSG00000015961, ENSMUSG00000027889, ENSMUSG00000062867, ENSMUSG00000026192, ENSMUSG00000022962, ENSMUSG00000020899, ENSMUSG00000029247, ENSMUSG00000017697, ENSMUSG00000027259, ENSMUSG00000027823, ENSMUSG00000002326	5884	15	13588	1.6935	1	0.506541	68.8371
GOTERM_BP_FAT	GO:0009081~branched chain family amino acid metabolic process	11	0.121399	0.0590899	ENSMUSG00000021460, ENSMUSG00000022536, ENSMUSG00000060376, ENSMUSG00000030826, ENSMUSG00000029776, ENSMUSG00000030268, ENSMUSG00000032263, ENSMUSG00000021238, ENSMUSG00000030802, ENSMUSG00000031969, ENSMUSG00000041426	5884	15	13588	1.6935	1	0.506541	68.8371
GOTERM_BP_FAT	GO:0031056~regulation of histone modification	11	0.121399	0.0590899	ENSMUSG00000025469, ENSMUSG00000020390, ENSMUSG00000002028, ENSMUSG00000014030, ENSMUSG00000005698, ENSMUSG00000002603, ENSMUSG00000059552, ENSMUSG00000018501, ENSMUSG00000074781, ENSMUSG00000036986, ENSMUSG00000024947	5884	15	13588	1.6935	1	0.506541	68.8371
GOTERM_BP_FAT	GO:0030514~negative regulation of BMP signaling pathway	11	0.121399	0.0590899	ENSMUSG00000037573, ENSMUSG00000031963, ENSMUSG00000074934, ENSMUSG00000020325, ENSMUSG00000012396, ENSMUSG00000033014, ENSMUSG00000030732, ENSMUSG00000048616, ENSMUSG00000050830, ENSMUSG00000024098, ENSMUSG00000006205	5884	15	13588	1.6935	1	0.506541	68.8371
GOTERM_BP_FAT	GO:0009126~purine nucleoside monophosphate metabolic process	11	0.121399	0.0590899	ENSMUSG00000015961, ENSMUSG00000027889, ENSMUSG00000062867, ENSMUSG00000026192, ENSMUSG00000022962, ENSMUSG00000020899, ENSMUSG00000029247, ENSMUSG00000017697, ENSMUSG00000027259, ENSMUSG00000027823, ENSMUSG00000002326	5884	15	13588	1.6935	1	0.506541	68.8371
GOTERM_BP_FAT	GO:0021700~developmental maturation	53	0.584924	0.059146	ENSMUSG00000048756, ENSMUSG00000019773, ENSMUSG00000031545, ENSMUSG00000030110, ENSMUSG00000015053, ENSMUSG00000045005, ENSMUSG00000031870, ENSMUSG00000029711, ENSMUSG00000026923, ENSMUSG00000054191, ENSMUSG00000020484, ENSMUSG00000034656, ENSMUSG00000079562, ENSMUSG00000041147, ENSMUSG00000025352, ENSMUSG00000019969, ENSMUSG00000062960, ENSMUSG00000028476, ENSMUSG00000020598, ENSMUSG00000033080,…	5884	101	13588	1.21182	1	0.506119	68.8726
GOTERM_BP_FAT	GO:0007281~germ cell development	53	0.584924	0.059146	ENSMUSG00000026915, ENSMUSG00000048756, ENSMUSG00000061353, ENSMUSG00000019773, ENSMUSG00000020745, ENSMUSG00000028389, ENSMUSG00000026159, ENSMUSG00000005893, ENSMUSG00000031922, ENSMUSG00000024151, ENSMUSG00000071359, ENSMUSG00000020308, ENSMUSG00000030846, ENSMUSG00000049470, ENSMUSG00000020390, ENSMUSG00000062300, ENSMUSG00000040140, ENSMUSG00000041147, ENSMUSG00000019966, ENSMUSG00000029848,…	5884	101	13588	1.21182	1	0.506119	68.8726
GOTERM_BP_FAT	GO:0001655~urogenital system development	74	0.816687	0.0598659	ENSMUSG00000007613, ENSMUSG00000027381, ENSMUSG00000020170, ENSMUSG00000048482, ENSMUSG00000046714, ENSMUSG00000030357, ENSMUSG00000015619, ENSMUSG00000028344, ENSMUSG00000030110, ENSMUSG00000031548, ENSMUSG00000027253, ENSMUSG00000037992, ENSMUSG00000038000, ENSMUSG00000025921, ENSMUSG00000042797, ENSMUSG00000048402, ENSMUSG00000048616, ENSMUSG00000013663, ENSMUSG00000019971, ENSMUSG00000001504,…	5884	146	13588	1.17047	1	0.50971	69.3254
GOTERM_BP_FAT	GO:0032271~regulation of protein polymerization	32	0.353162	0.0600556	ENSMUSG00000003031, ENSMUSG00000018293, ENSMUSG00000020476, ENSMUSG00000038775, ENSMUSG00000018411, ENSMUSG00000026755, ENSMUSG00000079523, ENSMUSG00000021262, ENSMUSG00000057738, ENSMUSG00000044042, ENSMUSG00000028745, ENSMUSG00000005871, ENSMUSG00000021573, ENSMUSG00000000416, ENSMUSG00000020315, ENSMUSG00000028991, ENSMUSG00000021061, ENSMUSG00000021754, ENSMUSG00000058587, ENSMUSG00000070372,…	5884	57	13588	1.29646	1	0.510088	69.4437
GOTERM_BP_FAT	GO:0007423~sensory organ development	125	1.37954	0.0604081	ENSMUSG00000019428, ENSMUSG00000027381, ENSMUSG00000046714, ENSMUSG00000038248, ENSMUSG00000029020, ENSMUSG00000002799, ENSMUSG00000014773, ENSMUSG00000021264, ENSMUSG00000026735, ENSMUSG00000048904, ENSMUSG00000025921, ENSMUSG00000025380, ENSMUSG00000019971, ENSMUSG00000074622, ENSMUSG00000030849, ENSMUSG00000051596, ENSMUSG00000040148, ENSMUSG00000022114, ENSMUSG00000022770, ENSMUSG00000020900,…	5884	257	13588	1.12321	1	0.511439	69.6623
GOTERM_BP_FAT	GO:0035113~embryonic appendage morphogenesis	51	0.562852	0.061937	ENSMUSG00000010721, ENSMUSG00000029050, ENSMUSG00000048562, ENSMUSG00000027985, ENSMUSG00000001288, ENSMUSG00000001656, ENSMUSG00000027253, ENSMUSG00000004768, ENSMUSG00000018604, ENSMUSG00000038000, ENSMUSG00000055932, ENSMUSG00000036602, ENSMUSG00000066595, ENSMUSG00000031565, ENSMUSG00000025921, ENSMUSG00000050064, ENSMUSG00000029754, ENSMUSG00000027763, ENSMUSG00000048402, ENSMUSG00000038210,…	5884	97	13588	1.21418	1	0.519735	70.5935
GOTERM_BP_FAT	GO:0022604~regulation of cell morphogenesis	51	0.562852	0.061937	ENSMUSG00000029381, ENSMUSG00000036533, ENSMUSG00000006219, ENSMUSG00000029516, ENSMUSG00000028906, ENSMUSG00000029512, ENSMUSG00000034384, ENSMUSG00000021451, ENSMUSG00000026193, ENSMUSG00000025348, ENSMUSG00000022607, ENSMUSG00000052298, ENSMUSG00000058230, ENSMUSG00000027394, ENSMUSG00000022443, ENSMUSG00000053646, ENSMUSG00000034656, ENSMUSG00000068327, ENSMUSG00000052397, ENSMUSG00000020902,…	5884	97	13588	1.21418	1	0.519735	70.5935
GOTERM_BP_FAT	GO:0030326~embryonic limb morphogenesis	51	0.562852	0.061937	ENSMUSG00000010721, ENSMUSG00000029050, ENSMUSG00000048562, ENSMUSG00000027985, ENSMUSG00000001288, ENSMUSG00000001656, ENSMUSG00000027253, ENSMUSG00000004768, ENSMUSG00000018604, ENSMUSG00000038000, ENSMUSG00000055932, ENSMUSG00000036602, ENSMUSG00000066595, ENSMUSG00000031565, ENSMUSG00000025921, ENSMUSG00000050064, ENSMUSG00000029754, ENSMUSG00000027763, ENSMUSG00000048402, ENSMUSG00000038210,…	5884	97	13588	1.21418	1	0.519735	70.5935
GOTERM_BP_FAT	GO:0051216~cartilage development	42	0.463525	0.0620747	ENSMUSG00000021109, ENSMUSG00000001288, ENSMUSG00000029335, ENSMUSG00000030732, ENSMUSG00000002384, ENSMUSG00000029546, ENSMUSG00000050965, ENSMUSG00000031668, ENSMUSG00000023391, ENSMUSG00000032855, ENSMUSG00000038331, ENSMUSG00000019997, ENSMUSG00000031565, ENSMUSG00000008999, ENSMUSG00000054252, ENSMUSG00000048616, ENSMUSG00000038210, ENSMUSG00000028763, ENSMUSG00000039004, ENSMUSG00000021796,…	5884	78	13588	1.24348	1	0.519779	70.676
GOTERM_BP_FAT	GO:0050982~detection of mechanical stimulus	12	0.132436	0.062644	ENSMUSG00000030302, ENSMUSG00000002771, ENSMUSG00000020704, ENSMUSG00000029205, ENSMUSG00000034462, ENSMUSG00000069170, ENSMUSG00000032855, ENSMUSG00000019843, ENSMUSG00000074637, ENSMUSG00000027274, ENSMUSG00000022346, ENSMUSG00000030209	5884	17	13588	1.6301	1	0.522342	71.0148
GOTERM_BP_FAT	GO:0016441~posttranscriptional gene silencing	12	0.132436	0.062644	ENSMUSG00000052707, ENSMUSG00000001424, ENSMUSG00000036698, ENSMUSG00000042500, ENSMUSG00000022718, ENSMUSG00000037364, ENSMUSG00000002227, ENSMUSG00000041530, ENSMUSG00000023051, ENSMUSG00000050966, ENSMUSG00000028842, ENSMUSG00000034610	5884	17	13588	1.6301	1	0.522342	71.0148
GOTERM_BP_FAT	GO:0035194~posttranscriptional gene silencing by RNA	12	0.132436	0.062644	ENSMUSG00000052707, ENSMUSG00000001424, ENSMUSG00000036698, ENSMUSG00000042500, ENSMUSG00000022718, ENSMUSG00000037364, ENSMUSG00000002227, ENSMUSG00000041530, ENSMUSG00000023051, ENSMUSG00000050966, ENSMUSG00000028842, ENSMUSG00000034610	5884	17	13588	1.6301	1	0.522342	71.0148
GOTERM_BP_FAT	GO:0009156~ribonucleoside monophosphate biosynthetic process	12	0.132436	0.062644	ENSMUSG00000079104, ENSMUSG00000015961, ENSMUSG00000027889, ENSMUSG00000062867, ENSMUSG00000026192, ENSMUSG00000031730, ENSMUSG00000047022, ENSMUSG00000022962, ENSMUSG00000020899, ENSMUSG00000029247, ENSMUSG00000017697, ENSMUSG00000027259, ENSMUSG00000027823	5884	17	13588	1.6301	1	0.522342	71.0148
GOTERM_BP_FAT	GO:0000209~protein polyubiquitination	12	0.132436	0.062644	ENSMUSG00000024735, ENSMUSG00000027598, ENSMUSG00000026792, ENSMUSG00000025261, ENSMUSG00000035293, ENSMUSG00000019927, ENSMUSG00000028960, ENSMUSG00000039615, ENSMUSG00000014668, ENSMUSG00000022771, ENSMUSG00000027300, ENSMUSG00000054115	5884	17	13588	1.6301	1	0.522342	71.0148
GOTERM_BP_FAT	GO:0052547~regulation of peptidase activity	29	0.320053	0.0630886	ENSMUSG00000029433, ENSMUSG00000036986, ENSMUSG00000051234, ENSMUSG00000024947, ENSMUSG00000041241, ENSMUSG00000028282, ENSMUSG00000029547, ENSMUSG00000031668, ENSMUSG00000024012, ENSMUSG00000019979, ENSMUSG00000059552, ENSMUSG00000021576, ENSMUSG00000022346, ENSMUSG00000024959, ENSMUSG00000028914, ENSMUSG00000003873, ENSMUSG00000034485, ENSMUSG00000062203, ENSMUSG00000039959, ENSMUSG00000063694,…	5884	51	13588	1.31314	1	0.52416	71.2769
GOTERM_BP_FAT	GO:0045637~regulation of myeloid cell differentiation	29	0.320053	0.0630886	ENSMUSG00000024425, ENSMUSG00000000134, ENSMUSG00000025223, ENSMUSG00000048756, ENSMUSG00000021109, ENSMUSG00000029359, ENSMUSG00000048546, ENSMUSG00000035576, ENSMUSG00000021647, ENSMUSG00000005871, ENSMUSG00000026155, ENSMUSG00000039410, ENSMUSG00000066551, ENSMUSG00000027276, ENSMUSG00000034274, ENSMUSG00000020716, ENSMUSG00000021025, ENSMUSG00000027523, ENSMUSG00000035158, ENSMUSG00000041417,…	5884	51	13588	1.31314	1	0.52416	71.2769
GOTERM_BP_FAT	GO:0010975~regulation of neuron projection development	27	0.29798	0.0650049	ENSMUSG00000029634, ENSMUSG00000029516, ENSMUSG00000029512, ENSMUSG00000018411, ENSMUSG00000028664, ENSMUSG00000034384, ENSMUSG00000020458, ENSMUSG00000021451, ENSMUSG00000022607, ENSMUSG00000027394, ENSMUSG00000034656, ENSMUSG00000053646, ENSMUSG00000068327, ENSMUSG00000020902, ENSMUSG00000018965, ENSMUSG00000002489, ENSMUSG00000022055, ENSMUSG00000025810, ENSMUSG00000027950, ENSMUSG00000034684,…	5884	47	13588	1.32663	1	0.534368	72.3809
GOTERM_BP_FAT	GO:0006476~protein amino acid deacetylation	13	0.143472	0.0652765	ENSMUSG00000062270, ENSMUSG00000025138, ENSMUSG00000020063, ENSMUSG00000019777, ENSMUSG00000024454, ENSMUSG00000028800, ENSMUSG00000006456, ENSMUSG00000040054, ENSMUSG00000029524, ENSMUSG00000062906, ENSMUSG00000029913, ENSMUSG00000025486, ENSMUSG00000034748	5884	19	13588	1.58006	1	0.535139	72.5341
GOTERM_BP_FAT	GO:0045666~positive regulation of neuron differentiation	13	0.143472	0.0652765	ENSMUSG00000047407, ENSMUSG00000048482, ENSMUSG00000035187, ENSMUSG00000074637, ENSMUSG00000050830, ENSMUSG00000062175, ENSMUSG00000024735, ENSMUSG00000073043, ENSMUSG00000079277, ENSMUSG00000027434, ENSMUSG00000020027, ENSMUSG00000007815, ENSMUSG00000048402	5884	19	13588	1.58006	1	0.535139	72.5341
GOTERM_BP_FAT	GO:0009161~ribonucleoside monophosphate metabolic process	13	0.143472	0.0652765	ENSMUSG00000047022, ENSMUSG00000022962, ENSMUSG00000020899, ENSMUSG00000029247, ENSMUSG00000027823, ENSMUSG00000002326, ENSMUSG00000079104, ENSMUSG00000015961, ENSMUSG00000027889, ENSMUSG00000062867, ENSMUSG00000026192, ENSMUSG00000031730, ENSMUSG00000017697, ENSMUSG00000027259	5884	19	13588	1.58006	1	0.535139	72.5341
GOTERM_BP_FAT	GO:0032886~regulation of microtubule-based process	26	0.286944	0.0659103	ENSMUSG00000015222, ENSMUSG00000003031, ENSMUSG00000020492, ENSMUSG00000064302, ENSMUSG00000028059, ENSMUSG00000018411, ENSMUSG00000033392, ENSMUSG00000027254, ENSMUSG00000073542, ENSMUSG00000052727, ENSMUSG00000025758, ENSMUSG00000005871, ENSMUSG00000005732, ENSMUSG00000000416, ENSMUSG00000037313, ENSMUSG00000027274, ENSMUSG00000048799, ENSMUSG00000026131, ENSMUSG00000057113, ENSMUSG00000032479,…	5884	45	13588	1.33427	1	0.537939	72.8884
GOTERM_BP_FAT	GO:0001667~ameboidal cell migration	26	0.286944	0.0659103	ENSMUSG00000025969, ENSMUSG00000061353, ENSMUSG00000021109, ENSMUSG00000030110, ENSMUSG00000022122, ENSMUSG00000028868, ENSMUSG00000020097, ENSMUSG00000038793, ENSMUSG00000024750, ENSMUSG00000071796, ENSMUSG00000027002, ENSMUSG00000026497, ENSMUSG00000015647, ENSMUSG00000034486, ENSMUSG00000001761, ENSMUSG00000026872, ENSMUSG00000037171, ENSMUSG00000019966, ENSMUSG00000034684, ENSMUSG00000037279,…	5884	45	13588	1.33427	1	0.537939	72.8884
GOTERM_BP_FAT	GO:0051051~negative regulation of transport	39	0.430416	0.0662291	ENSMUSG00000024589, ENSMUSG00000026792, ENSMUSG00000028889, ENSMUSG00000040276, ENSMUSG00000028367, ENSMUSG00000002603, ENSMUSG00000020176, ENSMUSG00000037035, ENSMUSG00000032562, ENSMUSG00000039156, ENSMUSG00000042429, ENSMUSG00000043733, ENSMUSG00000026196, ENSMUSG00000032216, ENSMUSG00000050965, ENSMUSG00000016664, ENSMUSG00000029524, ENSMUSG00000024406, ENSMUSG00000037313, ENSMUSG00000027257,…	5884	72	13588	1.25088	1	0.538957	73.065
GOTERM_BP_FAT	GO:0051259~protein oligomerization	39	0.430416	0.0662291	ENSMUSG00000024759, ENSMUSG00000026880, ENSMUSG00000038240, ENSMUSG00000001323, ENSMUSG00000036251, ENSMUSG00000025616, ENSMUSG00000038677, ENSMUSG00000005534, ENSMUSG00000005533, ENSMUSG00000042462, ENSMUSG00000031668, ENSMUSG00000021182, ENSMUSG00000031922, ENSMUSG00000000263, ENSMUSG00000059811, ENSMUSG00000057113, ENSMUSG00000024194, ENSMUSG00000016520, ENSMUSG00000068206, ENSMUSG00000029468,…	5884	72	13588	1.25088	1	0.538957	73.065
GOTERM_BP_FAT	GO:0006486~protein amino acid glycosylation	48	0.529743	0.0663866	ENSMUSG00000028413, ENSMUSG00000040364, ENSMUSG00000055373, ENSMUSG00000034126, ENSMUSG00000056812, ENSMUSG00000028700, ENSMUSG00000025425, ENSMUSG00000034780, ENSMUSG00000046152, ENSMUSG00000028538, ENSMUSG00000022885, ENSMUSG00000052544, ENSMUSG00000071650, ENSMUSG00000037470, ENSMUSG00000050796, ENSMUSG00000051650, ENSMUSG00000031608, ENSMUSG00000027808, ENSMUSG00000030062, ENSMUSG00000031749,…	5884	91	13588	1.2181	1	0.539073	73.1518
GOTERM_BP_FAT	GO:0070085~glycosylation	48	0.529743	0.0663866	ENSMUSG00000028413, ENSMUSG00000040364, ENSMUSG00000055373, ENSMUSG00000034126, ENSMUSG00000056812, ENSMUSG00000028700, ENSMUSG00000025425, ENSMUSG00000034780, ENSMUSG00000046152, ENSMUSG00000028538, ENSMUSG00000022885, ENSMUSG00000052544, ENSMUSG00000071650, ENSMUSG00000037470, ENSMUSG00000050796, ENSMUSG00000051650, ENSMUSG00000031608, ENSMUSG00000027808, ENSMUSG00000030062, ENSMUSG00000031749,…	5884	91	13588	1.2181	1	0.539073	73.1518
GOTERM_BP_FAT	GO:0043413~biopolymer glycosylation	48	0.529743	0.0663866	ENSMUSG00000028413, ENSMUSG00000040364, ENSMUSG00000055373, ENSMUSG00000034126, ENSMUSG00000056812, ENSMUSG00000028700, ENSMUSG00000025425, ENSMUSG00000034780, ENSMUSG00000046152, ENSMUSG00000028538, ENSMUSG00000022885, ENSMUSG00000052544, ENSMUSG00000071650, ENSMUSG00000037470, ENSMUSG00000050796, ENSMUSG00000051650, ENSMUSG00000031608, ENSMUSG00000027808, ENSMUSG00000030062, ENSMUSG00000031749,…	5884	91	13588	1.2181	1	0.539073	73.1518
GOTERM_BP_FAT	GO:0001570~vasculogenesis	25	0.275908	0.0667682	ENSMUSG00000062078, ENSMUSG00000021127, ENSMUSG00000001517, ENSMUSG00000025902, ENSMUSG00000020097, ENSMUSG00000032494, ENSMUSG00000034520, ENSMUSG00000006445, ENSMUSG00000022607, ENSMUSG00000074733, ENSMUSG00000032187, ENSMUSG00000007817, ENSMUSG00000025314, ENSMUSG00000032220, ENSMUSG00000001761, ENSMUSG00000021549, ENSMUSG00000019789, ENSMUSG00000062960, ENSMUSG00000055254, ENSMUSG00000039910,…	5884	43	13588	1.34262	1	0.540432	73.3611
GOTERM_BP_FAT	GO:0010553~negative regulation of specific transcription from RNA polymerase II promoter	14	0.154508	0.0671855	ENSMUSG00000037638, ENSMUSG00000028957, ENSMUSG00000022528, ENSMUSG00000039994, ENSMUSG00000020893, ENSMUSG00000028800, ENSMUSG00000055866, ENSMUSG00000048109, ENSMUSG00000021575, ENSMUSG00000036940, ENSMUSG00000022346, ENSMUSG00000024986, ENSMUSG00000037622, ENSMUSG00000028946	5884	21	13588	1.53954	1	0.541978	73.5882
GOTERM_BP_FAT	GO:0030510~regulation of BMP signaling pathway	14	0.154508	0.0671855	ENSMUSG00000019428, ENSMUSG00000037573, ENSMUSG00000055653, ENSMUSG00000031963, ENSMUSG00000012396, ENSMUSG00000030732, ENSMUSG00000050830, ENSMUSG00000024098, ENSMUSG00000006205, ENSMUSG00000074934, ENSMUSG00000052155, ENSMUSG00000020325, ENSMUSG00000033014, ENSMUSG00000048616	5884	21	13588	1.53954	1	0.541978	73.5882
GOTERM_BP_FAT	GO:0034329~cell junction assembly	14	0.154508	0.0671855	ENSMUSG00000031985, ENSMUSG00000020689, ENSMUSG00000055322, ENSMUSG00000030342, ENSMUSG00000037815, ENSMUSG00000031523, ENSMUSG00000000555, ENSMUSG00000047197, ENSMUSG00000029528, ENSMUSG00000028465, ENSMUSG00000033985, ENSMUSG00000026193, ENSMUSG00000026478, ENSMUSG00000022178	5884	21	13588	1.53954	1	0.541978	73.5882
GOTERM_BP_FAT	GO:0032507~maintenance of protein location in cell	14	0.154508	0.0671855	ENSMUSG00000052707, ENSMUSG00000028465, ENSMUSG00000031328, ENSMUSG00000026751, ENSMUSG00000079111, ENSMUSG00000040462, ENSMUSG00000002778, ENSMUSG00000026683, ENSMUSG00000037313, ENSMUSG00000025231, ENSMUSG00000039456, ENSMUSG00000079614, ENSMUSG00000036986, ENSMUSG00000010517	5884	21	13588	1.53954	1	0.541978	73.5882
GOTERM_BP_FAT	GO:0032313~regulation of Rab GTPase activity	23	0.253835	0.0682931	ENSMUSG00000039678, ENSMUSG00000031709, ENSMUSG00000040247, ENSMUSG00000029174, ENSMUSG00000037410, ENSMUSG00000039813, ENSMUSG00000039976, ENSMUSG00000038351, ENSMUSG00000039178, ENSMUSG00000051864, ENSMUSG00000021368, ENSMUSG00000023923, ENSMUSG00000042473, ENSMUSG00000036473, ENSMUSG00000020130, ENSMUSG00000026024, ENSMUSG00000038520, ENSMUSG00000022749, ENSMUSG00000035437, ENSMUSG00000042303,…	5884	39	13588	1.3619	1	0.547286	74.1821
GOTERM_BP_FAT	GO:0032483~regulation of Rab protein signal transduction	23	0.253835	0.0682931	ENSMUSG00000039678, ENSMUSG00000031709, ENSMUSG00000040247, ENSMUSG00000029174, ENSMUSG00000037410, ENSMUSG00000039813, ENSMUSG00000039976, ENSMUSG00000038351, ENSMUSG00000039178, ENSMUSG00000051864, ENSMUSG00000021368, ENSMUSG00000023923, ENSMUSG00000042473, ENSMUSG00000036473, ENSMUSG00000020130, ENSMUSG00000026024, ENSMUSG00000038520, ENSMUSG00000022749, ENSMUSG00000035437, ENSMUSG00000042303,…	5884	39	13588	1.3619	1	0.547286	74.1821
GOTERM_BP_FAT	GO:0006099~tricarboxylic acid cycle	15	0.165545	0.0685212	ENSMUSG00000022477, ENSMUSG00000028405, ENSMUSG00000020321, ENSMUSG00000021577, ENSMUSG00000058076, ENSMUSG00000002010, ENSMUSG00000032279, ENSMUSG00000000171, ENSMUSG00000004789, ENSMUSG00000019179, ENSMUSG00000005683, ENSMUSG00000025950, ENSMUSG00000010277, ENSMUSG00000030541, ENSMUSG00000027406	5884	23	13588	1.50607	1	0.547766	74.3028
GOTERM_BP_FAT	GO:0000723~telomere maintenance	15	0.165545	0.0685212	ENSMUSG00000025925, ENSMUSG00000064796, ENSMUSG00000026496, ENSMUSG00000038685, ENSMUSG00000030528, ENSMUSG00000028224, ENSMUSG00000022672, ENSMUSG00000032410, ENSMUSG00000024811, ENSMUSG00000038000, ENSMUSG00000038290, ENSMUSG00000024174, ENSMUSG00000021958, ENSMUSG00000029676, ENSMUSG00000031921	5884	23	13588	1.50607	1	0.547766	74.3028
GOTERM_BP_FAT	GO:0048864~stem cell development	15	0.165545	0.0685212	ENSMUSG00000021796, ENSMUSG00000037171, ENSMUSG00000031540, ENSMUSG00000021255, ENSMUSG00000050917, ENSMUSG00000022521, ENSMUSG00000005871, ENSMUSG00000003032, ENSMUSG00000024406, ENSMUSG00000012396, ENSMUSG00000074637, ENSMUSG00000041359, ENSMUSG00000036202, ENSMUSG00000034610, ENSMUSG00000029646	5884	23	13588	1.50607	1	0.547766	74.3028
GOTERM_BP_FAT	GO:0006695~cholesterol biosynthetic process	15	0.165545	0.0685212	ENSMUSG00000058454, ENSMUSG00000059743, ENSMUSG00000026675, ENSMUSG00000003721, ENSMUSG00000018042, ENSMUSG00000001467, ENSMUSG00000021670, ENSMUSG00000006517, ENSMUSG00000058258, ENSMUSG00000045294, ENSMUSG00000024799, ENSMUSG00000034926, ENSMUSG00000021273, ENSMUSG00000041939, ENSMUSG00000032083	5884	23	13588	1.50607	1	0.547766	74.3028
GOTERM_BP_FAT	GO:0007585~respiratory gaseous exchange	16	0.176581	0.0693987	ENSMUSG00000074622, ENSMUSG00000034612, ENSMUSG00000038253, ENSMUSG00000033585, ENSMUSG00000008763, ENSMUSG00000038718, ENSMUSG00000031840, ENSMUSG00000021065, ENSMUSG00000025579, ENSMUSG00000068079, ENSMUSG00000026959, ENSMUSG00000024750, ENSMUSG00000017386, ENSMUSG00000028138, ENSMUSG00000024163, ENSMUSG00000040610	5884	25	13588	1.47796	1	0.551746	74.7623
GOTERM_BP_FAT	GO:0006984~ER-nuclear signaling pathway	16	0.176581	0.0693987	ENSMUSG00000029467, ENSMUSG00000027810, ENSMUSG00000070348, ENSMUSG00000024079, ENSMUSG00000046062, ENSMUSG00000020715, ENSMUSG00000022812, ENSMUSG00000026864, ENSMUSG00000078622, ENSMUSG00000025408, ENSMUSG00000031668, ENSMUSG00000015839, ENSMUSG00000027808, ENSMUSG00000059552, ENSMUSG00000040435, ENSMUSG00000022365	5884	25	13588	1.47796	1	0.551746	74.7623
GOTERM_BP_FAT	GO:0006487~protein amino acid N-linked glycosylation	16	0.176581	0.0693987	ENSMUSG00000028413, ENSMUSG00000032123, ENSMUSG00000003402, ENSMUSG00000032437, ENSMUSG00000027642, ENSMUSG00000028700, ENSMUSG00000035845, ENSMUSG00000026856, ENSMUSG00000043998, ENSMUSG00000071650, ENSMUSG00000042747, ENSMUSG00000036155, ENSMUSG00000028757, ENSMUSG00000035704, ENSMUSG00000032116, ENSMUSG00000035521	5884	25	13588	1.47796	1	0.551746	74.7623
GOTERM_BP_FAT	GO:0060021~palate development	21	0.231762	0.0694574	ENSMUSG00000021796, ENSMUSG00000007613, ENSMUSG00000040268, ENSMUSG00000061393, ENSMUSG00000052957, ENSMUSG00000022483, ENSMUSG00000003721, ENSMUSG00000027985, ENSMUSG00000029287, ENSMUSG00000028207, ENSMUSG00000022770, ENSMUSG00000020097, ENSMUSG00000024947, ENSMUSG00000021253, ENSMUSG00000047824, ENSMUSG00000045294, ENSMUSG00000038331, ENSMUSG00000036602, ENSMUSG00000027777, ENSMUSG00000029231,…	5884	35	13588	1.38559	1	0.551304	74.7928
GOTERM_BP_FAT	GO:0043242~negative regulation of protein complex disassembly	21	0.231762	0.0694574	ENSMUSG00000015222, ENSMUSG00000021061, ENSMUSG00000032479, ENSMUSG00000064302, ENSMUSG00000020476, ENSMUSG00000058587, ENSMUSG00000070372, ENSMUSG00000035299, ENSMUSG00000028059, ENSMUSG00000038775, ENSMUSG00000018411, ENSMUSG00000023022, ENSMUSG00000033392, ENSMUSG00000027254, ENSMUSG00000026879, ENSMUSG00000021262, ENSMUSG00000057738, ENSMUSG00000052727, ENSMUSG00000028745, ENSMUSG00000005871,…	5884	35	13588	1.38559	1	0.551304	74.7928
GOTERM_BP_FAT	GO:0009880~embryonic pattern specification	21	0.231762	0.0694574	ENSMUSG00000027002, ENSMUSG00000030513, ENSMUSG00000020170, ENSMUSG00000073678, ENSMUSG00000030849, ENSMUSG00000012396, ENSMUSG00000033282, ENSMUSG00000028718, ENSMUSG00000055799, ENSMUSG00000066687, ENSMUSG00000018604, ENSMUSG00000037171, ENSMUSG00000032402, ENSMUSG00000014773, ENSMUSG00000038331, ENSMUSG00000021540, ENSMUSG00000008999, ENSMUSG00000032494, ENSMUSG00000047248, ENSMUSG00000070526,…	5884	35	13588	1.38559	1	0.551304	74.7928
GOTERM_BP_FAT	GO:0048736~appendage development	61	0.673215	0.0695746	ENSMUSG00000010721, ENSMUSG00000028207, ENSMUSG00000027253, ENSMUSG00000004768, ENSMUSG00000018604, ENSMUSG00000038000, ENSMUSG00000066595, ENSMUSG00000025921, ENSMUSG00000029754, ENSMUSG00000027763, ENSMUSG00000048402, ENSMUSG00000032187, ENSMUSG00000026923, ENSMUSG00000001815, ENSMUSG00000034612, ENSMUSG00000027547, ENSMUSG00000038765, ENSMUSG00000030849, ENSMUSG00000047193, ENSMUSG00000040913,…	5884	119	13588	1.18377	1	0.551176	74.8534
GOTERM_BP_FAT	GO:0060173~limb development	61	0.673215	0.0695746	ENSMUSG00000010721, ENSMUSG00000028207, ENSMUSG00000027253, ENSMUSG00000004768, ENSMUSG00000018604, ENSMUSG00000038000, ENSMUSG00000066595, ENSMUSG00000025921, ENSMUSG00000029754, ENSMUSG00000027763, ENSMUSG00000048402, ENSMUSG00000032187, ENSMUSG00000026923, ENSMUSG00000001815, ENSMUSG00000034612, ENSMUSG00000027547, ENSMUSG00000038765, ENSMUSG00000030849, ENSMUSG00000047193, ENSMUSG00000040913,…	5884	119	13588	1.18377	1	0.551176	74.8534
GOTERM_BP_FAT	GO:0009100~glycoprotein metabolic process	74	0.816687	0.0695979	ENSMUSG00000021109, ENSMUSG00000056812, ENSMUSG00000028700, ENSMUSG00000028343, ENSMUSG00000027198, ENSMUSG00000028538, ENSMUSG00000022885, ENSMUSG00000071650, ENSMUSG00000037470, ENSMUSG00000050796, ENSMUSG00000051650, ENSMUSG00000049001, ENSMUSG00000045216, ENSMUSG00000031608, ENSMUSG00000031749, ENSMUSG00000030062, ENSMUSG00000035704, ENSMUSG00000032116, ENSMUSG00000032640, ENSMUSG00000034612,…	5884	147	13588	1.16251	1	0.550547	74.8655
GOTERM_BP_FAT	GO:0021761~limbic system development	20	0.220726	0.0698518	ENSMUSG00000053129, ENSMUSG00000021685, ENSMUSG00000004892, ENSMUSG00000026812, ENSMUSG00000027985, ENSMUSG00000020745, ENSMUSG00000020849, ENSMUSG00000003873, ENSMUSG00000019777, ENSMUSG00000041911, ENSMUSG00000026872, ENSMUSG00000028800, ENSMUSG00000001496, ENSMUSG00000018604, ENSMUSG00000024518, ENSMUSG00000023391, ENSMUSG00000029026, ENSMUSG00000028613, ENSMUSG00000027274, ENSMUSG00000028969	5884	33	13588	1.39958	1	0.551151	74.9965
GOTERM_BP_FAT	GO:0051235~maintenance of location	20	0.220726	0.0698518	ENSMUSG00000031328, ENSMUSG00000040374, ENSMUSG00000018293, ENSMUSG00000040462, ENSMUSG00000002778, ENSMUSG00000026683, ENSMUSG00000039456, ENSMUSG00000025231, ENSMUSG00000002985, ENSMUSG00000036986, ENSMUSG00000033952, ENSMUSG00000010517, ENSMUSG00000052707, ENSMUSG00000079523, ENSMUSG00000028465, ENSMUSG00000026751, ENSMUSG00000079111, ENSMUSG00000037313, ENSMUSG00000079614, ENSMUSG00000032199	5884	33	13588	1.39958	1	0.551151	74.9965
GOTERM_BP_FAT	GO:0006084~acetyl-CoA metabolic process	19	0.20969	0.0700837	ENSMUSG00000022477, ENSMUSG00000028405, ENSMUSG00000020321, ENSMUSG00000021577, ENSMUSG00000058076, ENSMUSG00000027605, ENSMUSG00000002010, ENSMUSG00000032279, ENSMUSG00000020917, ENSMUSG00000000171, ENSMUSG00000004789, ENSMUSG00000019179, ENSMUSG00000005683, ENSMUSG00000010277, ENSMUSG00000025950, ENSMUSG00000027452, ENSMUSG00000000168, ENSMUSG00000030541, ENSMUSG00000027406	5884	31	13588	1.41539	1	0.551636	75.1155
GOTERM_BP_FAT	GO:0009166~nucleotide catabolic process	19	0.20969	0.0700837	ENSMUSG00000032615, ENSMUSG00000038704, ENSMUSG00000021684, ENSMUSG00000020736, ENSMUSG00000025575, ENSMUSG00000048120, ENSMUSG00000029310, ENSMUSG00000036639, ENSMUSG00000025584, ENSMUSG00000053965, ENSMUSG00000020407, ENSMUSG00000002326, ENSMUSG00000015085, ENSMUSG00000040658, ENSMUSG00000025192, ENSMUSG00000026839, ENSMUSG00000021699, ENSMUSG00000017697, ENSMUSG00000041168	5884	31	13588	1.41539	1	0.551636	75.1155
GOTERM_BP_FAT	GO:0009101~glycoprotein biosynthetic process	60	0.662179	0.0712657	ENSMUSG00000056812, ENSMUSG00000028700, ENSMUSG00000027198, ENSMUSG00000028538, ENSMUSG00000022885, ENSMUSG00000071650, ENSMUSG00000037470, ENSMUSG00000050796, ENSMUSG00000051650, ENSMUSG00000045216, ENSMUSG00000031608, ENSMUSG00000031749, ENSMUSG00000030062, ENSMUSG00000035704, ENSMUSG00000032116, ENSMUSG00000032640, ENSMUSG00000034612, ENSMUSG00000032123, ENSMUSG00000025789, ENSMUSG00000032437,…	5884	117	13588	1.18426	1	0.557135	75.7141
GOTERM_BP_FAT	GO:0035107~appendage morphogenesis	59	0.651142	0.0730027	ENSMUSG00000010721, ENSMUSG00000028207, ENSMUSG00000027253, ENSMUSG00000004768, ENSMUSG00000018604, ENSMUSG00000038000, ENSMUSG00000066595, ENSMUSG00000025921, ENSMUSG00000029754, ENSMUSG00000048402, ENSMUSG00000027763, ENSMUSG00000032187, ENSMUSG00000026923, ENSMUSG00000001815, ENSMUSG00000034612, ENSMUSG00000027547, ENSMUSG00000038765, ENSMUSG00000030849, ENSMUSG00000047193, ENSMUSG00000040913,…	5884	115	13588	1.18478	1	0.565421	76.569
GOTERM_BP_FAT	GO:0035108~limb morphogenesis	59	0.651142	0.0730027	ENSMUSG00000010721, ENSMUSG00000028207, ENSMUSG00000027253, ENSMUSG00000004768, ENSMUSG00000018604, ENSMUSG00000038000, ENSMUSG00000066595, ENSMUSG00000025921, ENSMUSG00000029754, ENSMUSG00000048402, ENSMUSG00000027763, ENSMUSG00000032187, ENSMUSG00000026923, ENSMUSG00000001815, ENSMUSG00000034612, ENSMUSG00000027547, ENSMUSG00000038765, ENSMUSG00000030849, ENSMUSG00000047193, ENSMUSG00000040913,…	5884	115	13588	1.18478	1	0.565421	76.569
GOTERM_BP_FAT	GO:0032231~regulation of actin filament bundle formation	7	0.0772542	0.073411	ENSMUSG00000028991, ENSMUSG00000042099, ENSMUSG00000032194, ENSMUSG00000043079, ENSMUSG00000035407, ENSMUSG00000007815, ENSMUSG00000045092	5884	8	13588	2.02065	1	0.566768	76.7658
GOTERM_BP_FAT	GO:0009263~deoxyribonucleotide biosynthetic process	7	0.0772542	0.073411	ENSMUSG00000071359, ENSMUSG00000026281, ENSMUSG00000025747, ENSMUSG00000030978, ENSMUSG00000022292, ENSMUSG00000039197, ENSMUSG00000020649	5884	8	13588	2.02065	1	0.566768	76.7658
GOTERM_BP_FAT	GO:0051492~regulation of stress fiber formation	7	0.0772542	0.073411	ENSMUSG00000028991, ENSMUSG00000042099, ENSMUSG00000032194, ENSMUSG00000043079, ENSMUSG00000035407, ENSMUSG00000007815, ENSMUSG00000045092	5884	8	13588	2.02065	1	0.566768	76.7658
GOTERM_BP_FAT	GO:0048505~regulation of timing of cell differentiation	7	0.0772542	0.073411	ENSMUSG00000021974, ENSMUSG00000039191, ENSMUSG00000037171, ENSMUSG00000020052, ENSMUSG00000022528, ENSMUSG00000027168, ENSMUSG00000028946	5884	8	13588	2.02065	1	0.566768	76.7658
GOTERM_BP_FAT	GO:0040034~regulation of development, heterochronic	7	0.0772542	0.073411	ENSMUSG00000021974, ENSMUSG00000039191, ENSMUSG00000037171, ENSMUSG00000020052, ENSMUSG00000022528, ENSMUSG00000027168, ENSMUSG00000028946	5884	8	13588	2.02065	1	0.566768	76.7658
GOTERM_BP_FAT	GO:0006613~cotranslational protein targeting to membrane	7	0.0772542	0.073411	ENSMUSG00000027828, ENSMUSG00000014504, ENSMUSG00000036323, ENSMUSG00000026511, ENSMUSG00000030654, ENSMUSG00000032042, ENSMUSG00000009549	5884	8	13588	2.02065	1	0.566768	76.7658
GOTERM_BP_FAT	GO:0006098~pentose-phosphate shunt	7	0.0772542	0.073411	ENSMUSG00000022536, ENSMUSG00000053604, ENSMUSG00000028961, ENSMUSG00000029776, ENSMUSG00000025503, ENSMUSG00000031807, ENSMUSG00000028980	5884	8	13588	2.02065	1	0.566768	76.7658
GOTERM_BP_FAT	GO:0043491~protein kinase B signaling cascade	7	0.0772542	0.073411	ENSMUSG00000001729, ENSMUSG00000026447, ENSMUSG00000055980, ENSMUSG00000020516, ENSMUSG00000027665, ENSMUSG00000002496, ENSMUSG00000049556	5884	8	13588	2.02065	1	0.566768	76.7658
GOTERM_BP_FAT	GO:0008593~regulation of Notch signaling pathway	7	0.0772542	0.073411	ENSMUSG00000021025, ENSMUSG00000020052, ENSMUSG00000021756, ENSMUSG00000008999, ENSMUSG00000074637, ENSMUSG00000027276, ENSMUSG00000019789	5884	8	13588	2.02065	1	0.566768	76.7658
GOTERM_BP_FAT	GO:0048147~negative regulation of fibroblast proliferation	7	0.0772542	0.073411	ENSMUSG00000030717, ENSMUSG00000006818, ENSMUSG00000021504, ENSMUSG00000003873, ENSMUSG00000059552, ENSMUSG00000039456, ENSMUSG00000031838	5884	8	13588	2.02065	1	0.566768	76.7658
GOTERM_BP_FAT	GO:0006983~ER overload response	7	0.0772542	0.073411	ENSMUSG00000025408, ENSMUSG00000031668, ENSMUSG00000046062, ENSMUSG00000059552, ENSMUSG00000078622, ENSMUSG00000026864, ENSMUSG00000022812	5884	8	13588	2.02065	1	0.566768	76.7658
GOTERM_BP_FAT	GO:0016053~organic acid biosynthetic process	71	0.783578	0.0747679	ENSMUSG00000026095, ENSMUSG00000001323, ENSMUSG00000025203, ENSMUSG00000032540, ENSMUSG00000053907, ENSMUSG00000020377, ENSMUSG00000025140, ENSMUSG00000027695, ENSMUSG00000021364, ENSMUSG00000017146, ENSMUSG00000041220, ENSMUSG00000025068, ENSMUSG00000032349, ENSMUSG00000029513, ENSMUSG00000026473, ENSMUSG00000029752, ENSMUSG00000020532, ENSMUSG00000010663, ENSMUSG00000042032, ENSMUSG00000041926,…	5884	141	13588	1.16285	1	0.572925	77.4085
GOTERM_BP_FAT	GO:0046394~carboxylic acid biosynthetic process	71	0.783578	0.0747679	ENSMUSG00000026095, ENSMUSG00000001323, ENSMUSG00000025203, ENSMUSG00000032540, ENSMUSG00000053907, ENSMUSG00000020377, ENSMUSG00000025140, ENSMUSG00000027695, ENSMUSG00000021364, ENSMUSG00000017146, ENSMUSG00000041220, ENSMUSG00000025068, ENSMUSG00000032349, ENSMUSG00000029513, ENSMUSG00000026473, ENSMUSG00000029752, ENSMUSG00000020532, ENSMUSG00000010663, ENSMUSG00000042032, ENSMUSG00000041926,…	5884	141	13588	1.16285	1	0.572925	77.4085
GOTERM_BP_FAT	GO:0007015~actin filament organization	31	0.342126	0.0783643	ENSMUSG00000079426, ENSMUSG00000066877, ENSMUSG00000020476, ENSMUSG00000028059, ENSMUSG00000023022, ENSMUSG00000022995, ENSMUSG00000021262, ENSMUSG00000026596, ENSMUSG00000034675, ENSMUSG00000029684, ENSMUSG00000018387, ENSMUSG00000028943, ENSMUSG00000037643, ENSMUSG00000010175, ENSMUSG00000038976, ENSMUSG00000031328, ENSMUSG00000037902, ENSMUSG00000024456, ENSMUSG00000052397, ENSMUSG00000072115,…	5884	56	13588	1.27837	1	0.589996	79.0315
GOTERM_BP_FAT	GO:0048469~cell maturation	40	0.441452	0.0799706	ENSMUSG00000020598, ENSMUSG00000033080, ENSMUSG00000033006, ENSMUSG00000048756, ENSMUSG00000019773, ENSMUSG00000021055, ENSMUSG00000032959, ENSMUSG00000031545, ENSMUSG00000030110, ENSMUSG00000022528, ENSMUSG00000034957, ENSMUSG00000015053, ENSMUSG00000030669, ENSMUSG00000070691, ENSMUSG00000023951, ENSMUSG00000045005, ENSMUSG00000031870, ENSMUSG00000027330, ENSMUSG00000029711, ENSMUSG00000031565,…	5884	75	13588	1.23163	1	0.59698	79.7202
GOTERM_BP_FAT	GO:0030334~regulation of cell migration	48	0.529743	0.0800756	ENSMUSG00000021910, ENSMUSG00000021149, ENSMUSG00000061353, ENSMUSG00000021109, ENSMUSG00000031714, ENSMUSG00000038387, ENSMUSG00000000489, ENSMUSG00000055723, ENSMUSG00000032259, ENSMUSG00000042429, ENSMUSG00000021823, ENSMUSG00000024486, ENSMUSG00000020611, ENSMUSG00000020458, ENSMUSG00000005871, ENSMUSG00000020659, ENSMUSG00000032494, ENSMUSG00000027314, ENSMUSG00000032796, ENSMUSG00000066551,…	5884	92	13588	1.20486	1	0.596727	79.7644
GOTERM_BP_FAT	GO:0002520~immune system development	141	1.55612	0.0811732	ENSMUSG00000038518, ENSMUSG00000027381, ENSMUSG00000039361, ENSMUSG00000020474, ENSMUSG00000031781, ENSMUSG00000021109, ENSMUSG00000032446, ENSMUSG00000029434, ENSMUSG00000018501, ENSMUSG00000026124, ENSMUSG00000038418, ENSMUSG00000042594, ENSMUSG00000022847, ENSMUSG00000021453, ENSMUSG00000002799, ENSMUSG00000035576, ENSMUSG00000029711, ENSMUSG00000066595, ENSMUSG00000039748, ENSMUSG00000025199,…	5884	295	13588	1.10377	1	0.601178	80.2216
GOTERM_BP_FAT	GO:0051098~regulation of binding	47	0.518707	0.0820393	ENSMUSG00000020227, ENSMUSG00000033276, ENSMUSG00000002603, ENSMUSG00000008730, ENSMUSG00000024927, ENSMUSG00000019370, ENSMUSG00000049871, ENSMUSG00000025408, ENSMUSG00000032402, ENSMUSG00000036438, ENSMUSG00000032688, ENSMUSG00000032409, ENSMUSG00000036931, ENSMUSG00000001175, ENSMUSG00000021025, ENSMUSG00000026928, ENSMUSG00000005161, ENSMUSG00000063358, ENSMUSG00000001761, ENSMUSG00000027187,…	5884	90	13588	1.20597	1	0.604488	80.5755
GOTERM_BP_FAT	GO:0008064~regulation of actin polymerization or depolymerization	28	0.309017	0.0832098	ENSMUSG00000018293, ENSMUSG00000020476, ENSMUSG00000038775, ENSMUSG00000023022, ENSMUSG00000079523, ENSMUSG00000026755, ENSMUSG00000021262, ENSMUSG00000057738, ENSMUSG00000028745, ENSMUSG00000044042, ENSMUSG00000020315, ENSMUSG00000028991, ENSMUSG00000021061, ENSMUSG00000021754, ENSMUSG00000058587, ENSMUSG00000070372, ENSMUSG00000008475, ENSMUSG00000040021, ENSMUSG00000022770, ENSMUSG00000030707,…	5884	50	13588	1.29322	1	0.609168	81.0442
GOTERM_BP_FAT	GO:0008016~regulation of heart contraction	28	0.309017	0.0832098	ENSMUSG00000020866, ENSMUSG00000030525, ENSMUSG00000045875, ENSMUSG00000032562, ENSMUSG00000030669, ENSMUSG00000025579, ENSMUSG00000032259, ENSMUSG00000004113, ENSMUSG00000042429, ENSMUSG00000024486, ENSMUSG00000050965, ENSMUSG00000032366, ENSMUSG00000021313, ENSMUSG00000027335, ENSMUSG00000025323, ENSMUSG00000017697, ENSMUSG00000029467, ENSMUSG00000033161, ENSMUSG00000025880, ENSMUSG00000000001,…	5884	50	13588	1.29322	1	0.609168	81.0442
GOTERM_BP_FAT	GO:0032320~positive regulation of Ras GTPase activity	8	0.0882905	0.0834421	ENSMUSG00000022568, ENSMUSG00000020716, ENSMUSG00000032356, ENSMUSG00000026024, ENSMUSG00000034255, ENSMUSG00000024096, ENSMUSG00000018736, ENSMUSG00000045092	5884	10	13588	1.84745	1	0.609487	81.1359
GOTERM_BP_FAT	GO:0031163~metallo-sulfur cluster assembly	8	0.0882905	0.0834421	ENSMUSG00000029993, ENSMUSG00000021241, ENSMUSG00000044792, ENSMUSG00000002280, ENSMUSG00000025825, ENSMUSG00000027618, ENSMUSG00000003662, ENSMUSG00000022503	5884	10	13588	1.84745	1	0.609487	81.1359
GOTERM_BP_FAT	GO:0045426~quinone cofactor biosynthetic process	8	0.0882905	0.0834421	ENSMUSG00000038240, ENSMUSG00000031782, ENSMUSG00000029319, ENSMUSG00000021235, ENSMUSG00000026784, ENSMUSG00000030652, ENSMUSG00000026798, ENSMUSG00000041733	5884	10	13588	1.84745	1	0.609487	81.1359
GOTERM_BP_FAT	GO:0016226~iron-sulfur cluster assembly	8	0.0882905	0.0834421	ENSMUSG00000029993, ENSMUSG00000021241, ENSMUSG00000044792, ENSMUSG00000002280, ENSMUSG00000025825, ENSMUSG00000027618, ENSMUSG00000003662, ENSMUSG00000022503	5884	10	13588	1.84745	1	0.609487	81.1359
GOTERM_BP_FAT	GO:0043484~regulation of RNA splicing	8	0.0882905	0.0834421	ENSMUSG00000075706, ENSMUSG00000084128, ENSMUSG00000063511, ENSMUSG00000040728, ENSMUSG00000028676, ENSMUSG00000024095, ENSMUSG00000074102, ENSMUSG00000027763, ENSMUSG00000057113	5884	10	13588	1.84745	1	0.609487	81.1359
GOTERM_BP_FAT	GO:0031575~G1/S transition checkpoint	8	0.0882905	0.0834421	ENSMUSG00000043991, ENSMUSG00000070348, ENSMUSG00000028495, ENSMUSG00000059552, ENSMUSG00000022601, ENSMUSG00000020413, ENSMUSG00000028224, ENSMUSG00000036986	5884	10	13588	1.84745	1	0.609487	81.1359
GOTERM_BP_FAT	GO:0046626~regulation of insulin receptor signaling pathway	8	0.0882905	0.0834421	ENSMUSG00000037112, ENSMUSG00000038037, ENSMUSG00000050965, ENSMUSG00000021948, ENSMUSG00000020176, ENSMUSG00000002496, ENSMUSG00000053113, ENSMUSG00000027646	5884	10	13588	1.84745	1	0.609487	81.1359
GOTERM_BP_FAT	GO:0016180~snRNA processing	8	0.0882905	0.0834421	ENSMUSG00000040738, ENSMUSG00000025133, ENSMUSG00000071652, ENSMUSG00000029547, ENSMUSG00000028016, ENSMUSG00000029034, ENSMUSG00000037461, ENSMUSG00000027933	5884	10	13588	1.84745	1	0.609487	81.1359
GOTERM_BP_FAT	GO:0046847~filopodium assembly	8	0.0882905	0.0834421	ENSMUSG00000018126, ENSMUSG00000020758, ENSMUSG00000038859, ENSMUSG00000030428, ENSMUSG00000025372, ENSMUSG00000033763, ENSMUSG00000022353, ENSMUSG00000027111	5884	10	13588	1.84745	1	0.609487	81.1359
GOTERM_BP_FAT	GO:0016073~snRNA metabolic process	8	0.0882905	0.0834421	ENSMUSG00000040738, ENSMUSG00000025133, ENSMUSG00000071652, ENSMUSG00000029547, ENSMUSG00000028016, ENSMUSG00000029034, ENSMUSG00000037461, ENSMUSG00000027933	5884	10	13588	1.84745	1	0.609487	81.1359
GOTERM_BP_FAT	GO:0015936~coenzyme A metabolic process	8	0.0882905	0.0834421	ENSMUSG00000018846, ENSMUSG00000001755, ENSMUSG00000037514, ENSMUSG00000020935, ENSMUSG00000029056, ENSMUSG00000063849, ENSMUSG00000021670, ENSMUSG00000033610	5884	10	13588	1.84745	1	0.609487	81.1359
GOTERM_BP_FAT	GO:0001833~inner cell mass cell proliferation	8	0.0882905	0.0834421	ENSMUSG00000024735, ENSMUSG00000027454, ENSMUSG00000041147, ENSMUSG00000029547, ENSMUSG00000042029, ENSMUSG00000018736, ENSMUSG00000023980, ENSMUSG00000025337	5884	10	13588	1.84745	1	0.609487	81.1359
GOTERM_BP_FAT	GO:0045446~endothelial cell differentiation	8	0.0882905	0.0834421	ENSMUSG00000010175, ENSMUSG00000042745, ENSMUSG00000001435, ENSMUSG00000063856, ENSMUSG00000062960, ENSMUSG00000038700, ENSMUSG00000018377, ENSMUSG00000045092	5884	10	13588	1.84745	1	0.609487	81.1359
GOTERM_BP_FAT	GO:0048839~inner ear development	46	0.50767	0.084057	ENSMUSG00000029275, ENSMUSG00000003031, ENSMUSG00000048482, ENSMUSG00000069170, ENSMUSG00000038982, ENSMUSG00000003721, ENSMUSG00000032368, ENSMUSG00000028341, ENSMUSG00000038248, ENSMUSG00000074637, ENSMUSG00000022528, ENSMUSG00000002799, ENSMUSG00000045294, ENSMUSG00000073043, ENSMUSG00000014773, ENSMUSG00000031565, ENSMUSG00000012819, ENSMUSG00000048904, ENSMUSG00000054252, ENSMUSG00000039137,…	5884	88	13588	1.20714	1	0.611556	81.3767
GOTERM_BP_FAT	GO:0030218~erythrocyte differentiation	27	0.29798	0.0848381	ENSMUSG00000024588, ENSMUSG00000031543, ENSMUSG00000003812, ENSMUSG00000018501, ENSMUSG00000033813, ENSMUSG00000023951, ENSMUSG00000029004, ENSMUSG00000021474, ENSMUSG00000029711, ENSMUSG00000066595, ENSMUSG00000042228, ENSMUSG00000032519, ENSMUSG00000056962, ENSMUSG00000054191, ENSMUSG00000016526, ENSMUSG00000029287, ENSMUSG00000006705, ENSMUSG00000079562, ENSMUSG00000024140, ENSMUSG00000027109,…	5884	48	13588	1.29899	1	0.614361	81.6784
GOTERM_BP_FAT	GO:0010212~response to ionizing radiation	27	0.29798	0.0848381	ENSMUSG00000022471, ENSMUSG00000028886, ENSMUSG00000052139, ENSMUSG00000026107, ENSMUSG00000036986, ENSMUSG00000024019, ENSMUSG00000019975, ENSMUSG00000031820, ENSMUSG00000059552, ENSMUSG00000029521, ENSMUSG00000024151, ENSMUSG00000048787, ENSMUSG00000021694, ENSMUSG00000003873, ENSMUSG00000034218, ENSMUSG00000078773, ENSMUSG00000022672, ENSMUSG00000063856, ENSMUSG00000041147, ENSMUSG00000006818,…	5884	48	13588	1.29899	1	0.614361	81.6784
GOTERM_BP_FAT	GO:0055085~transmembrane transport	215	2.37281	0.0851352	ENSMUSG00000004319, ENSMUSG00000070425, ENSMUSG00000050856, ENSMUSG00000025792, ENSMUSG00000003072, ENSMUSG00000018507, ENSMUSG00000006057, ENSMUSG00000062785, ENSMUSG00000026198, ENSMUSG00000021265, ENSMUSG00000022956, ENSMUSG00000040034, ENSMUSG00000050192, ENSMUSG00000033379, ENSMUSG00000000792, ENSMUSG00000040447, ENSMUSG00000032902, ENSMUSG00000037579, ENSMUSG00000024354, ENSMUSG00000020402,…	5884	460	13588	1.07935	1	0.614958	81.7919
GOTERM_BP_FAT	GO:0030879~mammary gland development	45	0.496634	0.0861305	ENSMUSG00000021609, ENSMUSG00000022568, ENSMUSG00000027381, ENSMUSG00000028413, ENSMUSG00000004264, ENSMUSG00000027678, ENSMUSG00000070348, ENSMUSG00000003051, ENSMUSG00000027985, ENSMUSG00000002603, ENSMUSG00000031545, ENSMUSG00000036986, ENSMUSG00000005533, ENSMUSG00000037601, ENSMUSG00000023951, ENSMUSG00000000093, ENSMUSG00000018604, ENSMUSG00000031870, ENSMUSG00000031668, ENSMUSG00000017724,…	5884	86	13588	1.20836	1	0.618683	82.1674
GOTERM_BP_FAT	GO:0006323~DNA packaging	52	0.573888	0.0865798	ENSMUSG00000069272, ENSMUSG00000034349, ENSMUSG00000069274, ENSMUSG00000005470, ENSMUSG00000060743, ENSMUSG00000056895, ENSMUSG00000058385, ENSMUSG00000054766, ENSMUSG00000018509, ENSMUSG00000058773, ENSMUSG00000075031, ENSMUSG00000031540, ENSMUSG00000032481, ENSMUSG00000021767, ENSMUSG00000060981, ENSMUSG00000032187, ENSMUSG00000059119, ENSMUSG00000036181, ENSMUSG00000020086, ENSMUSG00000069268,…	5884	101	13588	1.18895	1	0.619941	82.3345
GOTERM_BP_FAT	GO:0043405~regulation of MAP kinase activity	44	0.485598	0.0882615	ENSMUSG00000018932, ENSMUSG00000020227, ENSMUSG00000020170, ENSMUSG00000037211, ENSMUSG00000031714, ENSMUSG00000071369, ENSMUSG00000040687, ENSMUSG00000032501, ENSMUSG00000037239, ENSMUSG00000005672, ENSMUSG00000041241, ENSMUSG00000043733, ENSMUSG00000027177, ENSMUSG00000029528, ENSMUSG00000037706, ENSMUSG00000050965, ENSMUSG00000047139, ENSMUSG00000022788, ENSMUSG00000032715, ENSMUSG00000029026,…	5884	84	13588	1.20964	1	0.626608	82.9468
GOTERM_BP_FAT	GO:0006006~glucose metabolic process	70	0.772542	0.0885506	ENSMUSG00000032294, ENSMUSG00000062646, ENSMUSG00000004455, ENSMUSG00000032114, ENSMUSG00000033400, ENSMUSG00000048583, ENSMUSG00000022490, ENSMUSG00000040385, ENSMUSG00000025791, ENSMUSG00000004267, ENSMUSG00000033065, ENSMUSG00000028980, ENSMUSG00000053604, ENSMUSG00000032737, ENSMUSG00000037622, ENSMUSG00000042406, ENSMUSG00000057666, ENSMUSG00000024959, ENSMUSG00000011752, ENSMUSG00000006494,…	5884	140	13588	1.15466	1	0.627127	83.05
GOTERM_BP_FAT	GO:0070482~response to oxygen levels	35	0.386271	0.0898925	ENSMUSG00000026791, ENSMUSG00000021109, ENSMUSG00000002603, ENSMUSG00000000489, ENSMUSG00000036986, ENSMUSG00000053965, ENSMUSG00000026576, ENSMUSG00000022383, ENSMUSG00000058709, ENSMUSG00000023951, ENSMUSG00000021822, ENSMUSG00000047139, ENSMUSG00000025533, ENSMUSG00000029711, ENSMUSG00000021313, ENSMUSG00000026826, ENSMUSG00000025856, ENSMUSG00000032115, ENSMUSG00000032485, ENSMUSG00000020716,…	5884	65	13588	1.24348	1	0.632187	83.5214
GOTERM_BP_FAT	GO:0046164~alcohol catabolic process	35	0.386271	0.0898925	ENSMUSG00000021748, ENSMUSG00000021609, ENSMUSG00000032294, ENSMUSG00000000326, ENSMUSG00000021913, ENSMUSG00000028961, ENSMUSG00000063229, ENSMUSG00000004267, ENSMUSG00000033065, ENSMUSG00000028980, ENSMUSG00000020456, ENSMUSG00000053604, ENSMUSG00000031807, ENSMUSG00000057666, ENSMUSG00000025236, ENSMUSG00000011752, ENSMUSG00000024959, ENSMUSG00000022536, ENSMUSG00000020321, ENSMUSG00000000628,…	5884	65	13588	1.24348	1	0.632187	83.5214
GOTERM_BP_FAT	GO:0032387~negative regulation of intracellular transport	9	0.0993268	0.0901683	ENSMUSG00000020716, ENSMUSG00000026196, ENSMUSG00000028367, ENSMUSG00000037313, ENSMUSG00000025231, ENSMUSG00000034485, ENSMUSG00000027499, ENSMUSG00000028969, ENSMUSG00000010517	5884	12	13588	1.73199	1	0.632631	83.6167
GOTERM_BP_FAT	GO:0051647~nucleus localization	9	0.0993268	0.0901683	ENSMUSG00000065954, ENSMUSG00000037313, ENSMUSG00000024986, ENSMUSG00000026490, ENSMUSG00000022607, ENSMUSG00000025020, ENSMUSG00000020902, ENSMUSG00000048799, ENSMUSG00000020900	5884	12	13588	1.73199	1	0.632631	83.6167
GOTERM_BP_FAT	GO:0000578~embryonic axis specification	9	0.0993268	0.0901683	ENSMUSG00000027002, ENSMUSG00000055799, ENSMUSG00000030513, ENSMUSG00000018604, ENSMUSG00000020170, ENSMUSG00000032494, ENSMUSG00000070526, ENSMUSG00000047248, ENSMUSG00000028718	5884	12	13588	1.73199	1	0.632631	83.6167
GOTERM_BP_FAT	GO:0006298~mismatch repair	9	0.0993268	0.0901683	ENSMUSG00000005370, ENSMUSG00000026098, ENSMUSG00000034674, ENSMUSG00000055204, ENSMUSG00000039748, ENSMUSG00000005493, ENSMUSG00000024151, ENSMUSG00000032498, ENSMUSG00000079109	5884	12	13588	1.73199	1	0.632631	83.6167
GOTERM_BP_FAT	GO:0021516~dorsal spinal cord development	9	0.0993268	0.0901683	ENSMUSG00000053129, ENSMUSG00000029546, ENSMUSG00000020052, ENSMUSG00000025216, ENSMUSG00000028736, ENSMUSG00000020037, ENSMUSG00000038718, ENSMUSG00000041730, ENSMUSG00000029005	5884	12	13588	1.73199	1	0.632631	83.6167
GOTERM_BP_FAT	GO:0033261~regulation of S phase	9	0.0993268	0.0901683	ENSMUSG00000032397, ENSMUSG00000048787, ENSMUSG00000029207, ENSMUSG00000041147, ENSMUSG00000037032, ENSMUSG00000052957, ENSMUSG00000006585, ENSMUSG00000026309, ENSMUSG00000015461	5884	12	13588	1.73199	1	0.632631	83.6167
GOTERM_BP_FAT	GO:0051258~protein polymerization	23	0.253835	0.0912552	ENSMUSG00000026276, ENSMUSG00000001525, ENSMUSG00000079426, ENSMUSG00000072235, ENSMUSG00000035198, ENSMUSG00000019773, ENSMUSG00000024456, ENSMUSG00000067702, ENSMUSG00000023004, ENSMUSG00000072115, ENSMUSG00000045136, ENSMUSG00000019845, ENSMUSG00000001473, ENSMUSG00000020513, ENSMUSG00000026879, ENSMUSG00000021573, ENSMUSG00000000416, ENSMUSG00000026202, ENSMUSG00000068922, ENSMUSG00000062380,…	5884	40	13588	1.32786	1	0.636519	83.9873
GOTERM_BP_FAT	GO:0006413~translational initiation	22	0.242799	0.0927883	ENSMUSG00000028798, ENSMUSG00000016510, ENSMUSG00000024841, ENSMUSG00000026254, ENSMUSG00000028683, ENSMUSG00000070319, ENSMUSG00000023106, ENSMUSG00000024991, ENSMUSG00000029145, ENSMUSG00000028156, ENSMUSG00000022312, ENSMUSG00000031029, ENSMUSG00000020459, ENSMUSG00000057561, ENSMUSG00000037376, ENSMUSG00000011158, ENSMUSG00000033047, ENSMUSG00000004788, ENSMUSG00000021282, ENSMUSG00000056076,…	5884	38	13588	1.33697	1	0.642217	84.4966
GOTERM_BP_FAT	GO:0021536~diencephalon development	22	0.242799	0.0927883	ENSMUSG00000053129, ENSMUSG00000021609, ENSMUSG00000021796, ENSMUSG00000021685, ENSMUSG00000003873, ENSMUSG00000021994, ENSMUSG00000018501, ENSMUSG00000074637, ENSMUSG00000022528, ENSMUSG00000015053, ENSMUSG00000032259, ENSMUSG00000001496, ENSMUSG00000039191, ENSMUSG00000027950, ENSMUSG00000024518, ENSMUSG00000021506, ENSMUSG00000028023, ENSMUSG00000036940, ENSMUSG00000038805, ENSMUSG00000048616,…	5884	38	13588	1.33697	1	0.642217	84.4966
GOTERM_BP_FAT	GO:0070507~regulation of microtubule cytoskeleton organization	21	0.231762	0.094266	ENSMUSG00000015222, ENSMUSG00000032479, ENSMUSG00000003031, ENSMUSG00000020492, ENSMUSG00000064302, ENSMUSG00000035299, ENSMUSG00000068744, ENSMUSG00000028059, ENSMUSG00000028832, ENSMUSG00000018411, ENSMUSG00000033392, ENSMUSG00000027254, ENSMUSG00000073542, ENSMUSG00000052727, ENSMUSG00000005732, ENSMUSG00000005871, ENSMUSG00000025758, ENSMUSG00000000416, ENSMUSG00000026131, ENSMUSG00000020290,…	5884	36	13588	1.3471	1	0.647588	84.9729
GOTERM_BP_FAT	GO:0021511~spinal cord patterning	10	0.110363	0.0946538	ENSMUSG00000042453, ENSMUSG00000004768, ENSMUSG00000025352, ENSMUSG00000035187, ENSMUSG00000001761, ENSMUSG00000041309, ENSMUSG00000025231, ENSMUSG00000001521, ENSMUSG00000027168, ENSMUSG00000048402	5884	14	13588	1.64951	1	0.648443	85.0956
GOTERM_BP_FAT	GO:0031114~regulation of microtubule depolymerization	10	0.110363	0.0946538	ENSMUSG00000018411, ENSMUSG00000015222, ENSMUSG00000033392, ENSMUSG00000032479, ENSMUSG00000027254, ENSMUSG00000064302, ENSMUSG00000052727, ENSMUSG00000005871, ENSMUSG00000035299, ENSMUSG00000028059	5884	14	13588	1.64951	1	0.648443	85.0956
GOTERM_BP_FAT	GO:0007026~negative regulation of microtubule depolymerization	10	0.110363	0.0946538	ENSMUSG00000018411, ENSMUSG00000015222, ENSMUSG00000033392, ENSMUSG00000032479, ENSMUSG00000027254, ENSMUSG00000064302, ENSMUSG00000052727, ENSMUSG00000005871, ENSMUSG00000035299, ENSMUSG00000028059	5884	14	13588	1.64951	1	0.648443	85.0956
GOTERM_BP_FAT	GO:0051084~'de novo' posttranslational protein folding	10	0.110363	0.0946538	ENSMUSG00000037062, ENSMUSG00000037072, ENSMUSG00000059555, ENSMUSG00000015656, ENSMUSG00000009563, ENSMUSG00000026849, ENSMUSG00000026848, ENSMUSG00000029657, ENSMUSG00000060519, ENSMUSG00000005483	5884	14	13588	1.64951	1	0.648443	85.0956
GOTERM_BP_FAT	GO:0006458~'de novo' protein folding	10	0.110363	0.0946538	ENSMUSG00000037062, ENSMUSG00000037072, ENSMUSG00000059555, ENSMUSG00000015656, ENSMUSG00000009563, ENSMUSG00000026849, ENSMUSG00000026848, ENSMUSG00000029657, ENSMUSG00000060519, ENSMUSG00000005483	5884	14	13588	1.64951	1	0.648443	85.0956
GOTERM_BP_FAT	GO:0007044~cell-substrate junction assembly	10	0.110363	0.0946538	ENSMUSG00000020689, ENSMUSG00000029528, ENSMUSG00000028465, ENSMUSG00000055322, ENSMUSG00000026193, ENSMUSG00000033985, ENSMUSG00000026478, ENSMUSG00000031523, ENSMUSG00000000555, ENSMUSG00000022178	5884	14	13588	1.64951	1	0.648443	85.0956
GOTERM_BP_FAT	GO:0042771~DNA damage response, signal transduction by p53 class mediator resulting in induction of apoptosis	10	0.110363	0.0946538	ENSMUSG00000030717, ENSMUSG00000041147, ENSMUSG00000053175, ENSMUSG00000002083, ENSMUSG00000008730, ENSMUSG00000028630, ENSMUSG00000059552, ENSMUSG00000041801, ENSMUSG00000036986, ENSMUSG00000030609	5884	14	13588	1.64951	1	0.648443	85.0956
GOTERM_BP_FAT	GO:0022618~ribonucleoprotein complex assembly	20	0.220726	0.0956691	ENSMUSG00000020409, ENSMUSG00000027810, ENSMUSG00000007050, ENSMUSG00000024608, ENSMUSG00000024991, ENSMUSG00000028676, ENSMUSG00000055760, ENSMUSG00000025024, ENSMUSG00000001767, ENSMUSG00000008373, ENSMUSG00000021645, ENSMUSG00000027613, ENSMUSG00000062604, ENSMUSG00000060098, ENSMUSG00000038335, ENSMUSG00000005506, ENSMUSG00000023051, ENSMUSG00000022601, ENSMUSG00000031917, ENSMUSG00000027763	5884	34	13588	1.35842	1	0.651836	85.4124
GOTERM_BP_FAT	GO:0045333~cellular respiration	32	0.353162	0.0964284	ENSMUSG00000025968, ENSMUSG00000027010, ENSMUSG00000063882, ENSMUSG00000022477, ENSMUSG00000021577, ENSMUSG00000040463, ENSMUSG00000058076, ENSMUSG00000025204, ENSMUSG00000030647, ENSMUSG00000032279, ENSMUSG00000032342, ENSMUSG00000031902, ENSMUSG00000000171, ENSMUSG00000004789, ENSMUSG00000005683, ENSMUSG00000059534, ENSMUSG00000025651, ENSMUSG00000030541, ENSMUSG00000023089, ENSMUSG00000028405,…	5884	59	13588	1.25251	1	0.654163	85.645
GOTERM_BP_FAT	GO:0060041~retina development in camera-type eye	19	0.20969	0.0969737	ENSMUSG00000010175, ENSMUSG00000047407, ENSMUSG00000033080, ENSMUSG00000056962, ENSMUSG00000003873, ENSMUSG00000074637, ENSMUSG00000031688, ENSMUSG00000022656, ENSMUSG00000020900, ENSMUSG00000031737, ENSMUSG00000062175, ENSMUSG00000034777, ENSMUSG00000019803, ENSMUSG00000023328, ENSMUSG00000026317, ENSMUSG00000005871, ENSMUSG00000026735, ENSMUSG00000032012, ENSMUSG00000022601	5884	32	13588	1.37115	1	0.655616	85.81
GOTERM_BP_FAT	GO:0042471~ear morphogenesis	40	0.441452	0.0974013	ENSMUSG00000029275, ENSMUSG00000038982, ENSMUSG00000003721, ENSMUSG00000032368, ENSMUSG00000028341, ENSMUSG00000038248, ENSMUSG00000074637, ENSMUSG00000045294, ENSMUSG00000073043, ENSMUSG00000049691, ENSMUSG00000014773, ENSMUSG00000031565, ENSMUSG00000012819, ENSMUSG00000048904, ENSMUSG00000022346, ENSMUSG00000029754, ENSMUSG00000049555, ENSMUSG00000019971, ENSMUSG00000074622, ENSMUSG00000022297,…	5884	76	13588	1.21543	1	0.656592	85.9381
GOTERM_BP_FAT	GO:0030512~negative regulation of transforming growth factor beta receptor signaling pathway	11	0.121399	0.0975675	ENSMUSG00000021253, ENSMUSG00000034612, ENSMUSG00000029050, ENSMUSG00000030224, ENSMUSG00000046058, ENSMUSG00000027660, ENSMUSG00000032494, ENSMUSG00000039410, ENSMUSG00000059552, ENSMUSG00000026864, ENSMUSG00000006205	5884	16	13588	1.58765	1	0.656527	85.9875
GOTERM_BP_FAT	GO:0035050~embryonic heart tube development	11	0.121399	0.0975675	ENSMUSG00000027002, ENSMUSG00000033837, ENSMUSG00000031965, ENSMUSG00000037171, ENSMUSG00000046714, ENSMUSG00000050953, ENSMUSG00000057123, ENSMUSG00000050064, ENSMUSG00000021944, ENSMUSG00000024986, ENSMUSG00000018160	5884	16	13588	1.58765	1	0.656527	85.9875
GOTERM_BP_FAT	GO:0031111~negative regulation of microtubule polymerization or depolymerization	11	0.121399	0.0975675	ENSMUSG00000018411, ENSMUSG00000015222, ENSMUSG00000033392, ENSMUSG00000032479, ENSMUSG00000027254, ENSMUSG00000064302, ENSMUSG00000052727, ENSMUSG00000005871, ENSMUSG00000035299, ENSMUSG00000028059, ENSMUSG00000028832	5884	16	13588	1.58765	1	0.656527	85.9875
GOTERM_BP_FAT	GO:0021795~cerebral cortex cell migration	11	0.121399	0.0975675	ENSMUSG00000042453, ENSMUSG00000001496, ENSMUSG00000028519, ENSMUSG00000020283, ENSMUSG00000019969, ENSMUSG00000020745, ENSMUSG00000020122, ENSMUSG00000028613, ENSMUSG00000005069, ENSMUSG00000026890, ENSMUSG00000028969	5884	16	13588	1.58765	1	0.656527	85.9875
GOTERM_BP_FAT	GO:0006195~purine nucleotide catabolic process	11	0.121399	0.0975675	ENSMUSG00000015085, ENSMUSG00000021684, ENSMUSG00000021699, ENSMUSG00000036639, ENSMUSG00000029310, ENSMUSG00000048120, ENSMUSG00000017697, ENSMUSG00000025584, ENSMUSG00000041168, ENSMUSG00000053965, ENSMUSG00000002326	5884	16	13588	1.58765	1	0.656527	85.9875
GOTERM_BP_FAT	GO:0060571~morphogenesis of an epithelial fold	11	0.121399	0.0975675	ENSMUSG00000037171, ENSMUSG00000037279, ENSMUSG00000036180, ENSMUSG00000025921, ENSMUSG00000020122, ENSMUSG00000030849, ENSMUSG00000056201, ENSMUSG00000024986, ENSMUSG00000001819, ENSMUSG00000048616, ENSMUSG00000048402	5884	16	13588	1.58765	1	0.656527	85.9875
GOTERM_BP_FAT	GO:0045185~maintenance of protein location	17	0.187617	0.0991585	ENSMUSG00000031328, ENSMUSG00000040374, ENSMUSG00000018293, ENSMUSG00000040462, ENSMUSG00000002778, ENSMUSG00000026683, ENSMUSG00000039456, ENSMUSG00000025231, ENSMUSG00000036986, ENSMUSG00000010517, ENSMUSG00000052707, ENSMUSG00000079523, ENSMUSG00000028465, ENSMUSG00000026751, ENSMUSG00000079111, ENSMUSG00000037313, ENSMUSG00000079614	5884	28	13588	1.40208	1	0.662058	86.453
GOTERM_BP_FAT	GO:0016447~somatic recombination of immunoglobulin gene segments	12	0.132436	0.0993483	ENSMUSG00000022672, ENSMUSG00000005370, ENSMUSG00000029591, ENSMUSG00000000732, ENSMUSG00000039748, ENSMUSG00000003549, ENSMUSG00000020167, ENSMUSG00000028224, ENSMUSG00000024151, ENSMUSG00000032498, ENSMUSG00000079109, ENSMUSG00000030067	5884	18	13588	1.53954	1	0.662077	86.5075
GOTERM_BP_FAT	GO:0022029~telencephalon cell migration	12	0.132436	0.0993483	ENSMUSG00000042453, ENSMUSG00000032259, ENSMUSG00000001496, ENSMUSG00000028519, ENSMUSG00000020283, ENSMUSG00000019969, ENSMUSG00000020745, ENSMUSG00000020122, ENSMUSG00000028613, ENSMUSG00000005069, ENSMUSG00000026890, ENSMUSG00000028969	5884	18	13588	1.53954	1	0.662077	86.5075
GOTERM_BP_FAT	GO:0021545~cranial nerve development	12	0.132436	0.0993483	ENSMUSG00000037868, ENSMUSG00000028664, ENSMUSG00000032537, ENSMUSG00000048763, ENSMUSG00000027950, ENSMUSG00000079277, ENSMUSG00000024497, ENSMUSG00000018166, ENSMUSG00000041730, ENSMUSG00000022601, ENSMUSG00000022528, ENSMUSG00000028946	5884	18	13588	1.53954	1	0.662077	86.5075
GOTERM_BP_FAT	GO:0033014~tetrapyrrole biosynthetic process	12	0.132436	0.0993483	ENSMUSG00000029575, ENSMUSG00000021061, ENSMUSG00000024588, ENSMUSG00000022742, ENSMUSG00000032786, ENSMUSG00000030979, ENSMUSG00000028684, ENSMUSG00000031543, ENSMUSG00000039096, ENSMUSG00000023030, ENSMUSG00000032293, ENSMUSG00000032126	5884	18	13588	1.53954	1	0.662077	86.5075
GOTERM_BP_FAT	GO:0006779~porphyrin biosynthetic process	12	0.132436	0.0993483	ENSMUSG00000029575, ENSMUSG00000021061, ENSMUSG00000024588, ENSMUSG00000022742, ENSMUSG00000032786, ENSMUSG00000030979, ENSMUSG00000028684, ENSMUSG00000031543, ENSMUSG00000039096, ENSMUSG00000023030, ENSMUSG00000032293, ENSMUSG00000032126	5884	18	13588	1.53954	1	0.662077	86.5075
GOTERM_BP_FAT	GO:0043583~ear development	53	0.584924	0.099617	ENSMUSG00000029275, ENSMUSG00000027381, ENSMUSG00000003031, ENSMUSG00000048482, ENSMUSG00000069170, ENSMUSG00000028341, ENSMUSG00000038248, ENSMUSG00000002799, ENSMUSG00000045294, ENSMUSG00000014773, ENSMUSG00000048904, ENSMUSG00000025921, ENSMUSG00000039137, ENSMUSG00000003534, ENSMUSG00000029754, ENSMUSG00000019971, ENSMUSG00000074622, ENSMUSG00000022297, ENSMUSG00000051596, ENSMUSG00000030849,…	5884	104	13588	1.17686	1	0.662403	86.5843
GOTERM_CC_FAT	GO:0031974~membrane-enclosed lumen	810	8.93941	3.69173e-90	ENSMUSG00000056476, ENSMUSG00000019777, ENSMUSG00000043572, ENSMUSG00000039176, ENSMUSG00000046179, ENSMUSG00000006058, ENSMUSG00000029687, ENSMUSG00000038510, ENSMUSG00000001016, ENSMUSG00000025209, ENSMUSG00000025208, ENSMUSG00000056209, ENSMUSG00000032786, ENSMUSG00000030538, ENSMUSG00000020116, ENSMUSG00000025216, ENSMUSG00000025880, ENSMUSG00000024357, ENSMUSG00000036693, ENSMUSG00000006456,…	5158	1174	12504	1.67257	2.87217e-87	2.87217e-87	5.64606e-87
GOTERM_CC_FAT	GO:0070013~intracellular organelle lumen	786	8.67454	4.017e-89	ENSMUSG00000056476, ENSMUSG00000019777, ENSMUSG00000043572, ENSMUSG00000039176, ENSMUSG00000046179, ENSMUSG00000006058, ENSMUSG00000029687, ENSMUSG00000038510, ENSMUSG00000001016, ENSMUSG00000025209, ENSMUSG00000025208, ENSMUSG00000056209, ENSMUSG00000032786, ENSMUSG00000030538, ENSMUSG00000020116, ENSMUSG00000025216, ENSMUSG00000025880, ENSMUSG00000024357, ENSMUSG00000036693, ENSMUSG00000006456,…	5158	1133	12504	1.68175	3.12523e-86	1.56261e-86	6.14352e-86
GOTERM_CC_FAT	GO:0043233~organelle lumen	787	8.68558	8.91213e-89	ENSMUSG00000056476, ENSMUSG00000019777, ENSMUSG00000043572, ENSMUSG00000039176, ENSMUSG00000046179, ENSMUSG00000006058, ENSMUSG00000029687, ENSMUSG00000038510, ENSMUSG00000001016, ENSMUSG00000025209, ENSMUSG00000025208, ENSMUSG00000056209, ENSMUSG00000032786, ENSMUSG00000030538, ENSMUSG00000020116, ENSMUSG00000025216, ENSMUSG00000025880, ENSMUSG00000024357, ENSMUSG00000036693, ENSMUSG00000006456,…	5158	1136	12504	1.67944	6.93364e-86	2.31121e-86	1.363e-85
GOTERM_CC_FAT	GO:0031981~nuclear lumen	627	6.91977	2.0193e-76	ENSMUSG00000042729, ENSMUSG00000021109, ENSMUSG00000056476, ENSMUSG00000019777, ENSMUSG00000028907, ENSMUSG00000046179, ENSMUSG00000006058, ENSMUSG00000028707, ENSMUSG00000029687, ENSMUSG00000038510, ENSMUSG00000042308, ENSMUSG00000001016, ENSMUSG00000006392, ENSMUSG00000056209, ENSMUSG00000072872, ENSMUSG00000025782, ENSMUSG00000035293, ENSMUSG00000030538, ENSMUSG00000020116, ENSMUSG00000025216,…	5158	883	12504	1.72137	1.57101e-73	3.92753e-74	3.08827e-73
GOTERM_CC_FAT	GO:0043232~intracellular non-membrane-bounded organelle	1123	12.3938	1.02588e-61	ENSMUSG00000062647, ENSMUSG00000069272, ENSMUSG00000019773, ENSMUSG00000069274, ENSMUSG00000019777, ENSMUSG00000037815, ENSMUSG00000018707, ENSMUSG00000019370, ENSMUSG00000025480, ENSMUSG00000060636, ENSMUSG00000018509, ENSMUSG00000040034, ENSMUSG00000038510, ENSMUSG00000029684, ENSMUSG00000025209, ENSMUSG00000001016, ENSMUSG00000003279, ENSMUSG00000048758, ENSMUSG00000025208, ENSMUSG00000019971,…	5158	1919	12504	1.41864	7.98134e-59	1.59627e-59	1.56896e-58
GOTERM_CC_FAT	GO:0043228~non-membrane-bounded organelle	1123	12.3938	1.02588e-61	ENSMUSG00000062647, ENSMUSG00000069272, ENSMUSG00000019773, ENSMUSG00000069274, ENSMUSG00000019777, ENSMUSG00000037815, ENSMUSG00000018707, ENSMUSG00000019370, ENSMUSG00000025480, ENSMUSG00000060636, ENSMUSG00000018509, ENSMUSG00000040034, ENSMUSG00000038510, ENSMUSG00000029684, ENSMUSG00000025209, ENSMUSG00000001016, ENSMUSG00000003279, ENSMUSG00000048758, ENSMUSG00000025208, ENSMUSG00000019971,…	5158	1919	12504	1.41864	7.98134e-59	1.59627e-59	1.56896e-58
GOTERM_CC_FAT	GO:0005739~mitochondrion	797	8.79594	3.59828e-49	ENSMUSG00000019774, ENSMUSG00000025204, ENSMUSG00000003072, ENSMUSG00000043572, ENSMUSG00000026255, ENSMUSG00000039176, ENSMUSG00000006057, ENSMUSG00000060636, ENSMUSG00000046947, ENSMUSG00000042032, ENSMUSG00000033475, ENSMUSG00000025209, ENSMUSG00000025486, ENSMUSG00000025208, ENSMUSG00000030541, ENSMUSG00000059734, ENSMUSG00000032786, ENSMUSG00000019763, ENSMUSG00000037805, ENSMUSG00000039163,…	5158	1322	12504	1.46149	2.79946e-46	4.66577e-47	5.50314e-46
GOTERM_CC_FAT	GO:0030529~ribonucleoprotein complex	339	3.74131	1.16603e-45	ENSMUSG00000062647, ENSMUSG00000018199, ENSMUSG00000032399, ENSMUSG00000083325, ENSMUSG00000032777, ENSMUSG00000025794, ENSMUSG00000028907, ENSMUSG00000025103, ENSMUSG00000037563, ENSMUSG00000052707, ENSMUSG00000060636, ENSMUSG00000040824, ENSMUSG00000028902, ENSMUSG00000025208, ENSMUSG00000048758, ENSMUSG00000042699, ENSMUSG00000025508, ENSMUSG00000020409, ENSMUSG00000029169, ENSMUSG00000003660,…	5158	462	12504	1.77879	9.07169e-43	1.29596e-43	1.7833e-42
GOTERM_CC_FAT	GO:0005654~nucleoplasm	415	4.58007	1.99108e-45	ENSMUSG00000021109, ENSMUSG00000056476, ENSMUSG00000019777, ENSMUSG00000046179, ENSMUSG00000006058, ENSMUSG00000028707, ENSMUSG00000029687, ENSMUSG00000042308, ENSMUSG00000006392, ENSMUSG00000025782, ENSMUSG00000072872, ENSMUSG00000030538, ENSMUSG00000025216, ENSMUSG00000025880, ENSMUSG00000027641, ENSMUSG00000021500, ENSMUSG00000001910, ENSMUSG00000006456, ENSMUSG00000020708, ENSMUSG00000020801,…	5158	599	12504	1.67953	1.54906e-42	1.93632e-43	3.04512e-42
GOTERM_CC_FAT	GO:0005730~nucleolus	234	2.5825	9.4208e-35	ENSMUSG00000042729, ENSMUSG00000064030, ENSMUSG00000041057, ENSMUSG00000028907, ENSMUSG00000035575, ENSMUSG00000035576, ENSMUSG00000038510, ENSMUSG00000001016, ENSMUSG00000042699, ENSMUSG00000041966, ENSMUSG00000056209, ENSMUSG00000020116, ENSMUSG00000035293, ENSMUSG00000025785, ENSMUSG00000033166, ENSMUSG00000022772, ENSMUSG00000009575, ENSMUSG00000036693, ENSMUSG00000048039, ENSMUSG00000027304,…	5158	310	12504	1.82988	7.32938e-32	8.14375e-33	1.4408e-31
GOTERM_CC_FAT	GO:0044451~nucleoplasm part	346	3.81856	4.3564e-34	ENSMUSG00000000134, ENSMUSG00000021109, ENSMUSG00000056476, ENSMUSG00000019777, ENSMUSG00000026739, ENSMUSG00000046179, ENSMUSG00000006058, ENSMUSG00000028707, ENSMUSG00000029687, ENSMUSG00000021264, ENSMUSG00000026735, ENSMUSG00000042308, ENSMUSG00000030256, ENSMUSG00000081766, ENSMUSG00000006392, ENSMUSG00000001524, ENSMUSG00000020409, ENSMUSG00000025782, ENSMUSG00000025216, ENSMUSG00000025880,…	5158	513	12504	1.63503	3.38928e-31	3.38928e-32	6.66259e-31
GOTERM_CC_FAT	GO:0005694~chromosome	253	2.79219	2.65638e-24	ENSMUSG00000032397, ENSMUSG00000030254, ENSMUSG00000069272, ENSMUSG00000069274, ENSMUSG00000019777, ENSMUSG00000056895, ENSMUSG00000025480, ENSMUSG00000018509, ENSMUSG00000040034, ENSMUSG00000035576, ENSMUSG00000035198, ENSMUSG00000069268, ENSMUSG00000069266, ENSMUSG00000009575, ENSMUSG00000040044, ENSMUSG00000049232, ENSMUSG00000022779, ENSMUSG00000000934, ENSMUSG00000026646, ENSMUSG00000022391,…	5158	378	12504	1.62254	2.06666e-21	1.87878e-22	4.06261e-21
GOTERM_CC_FAT	GO:0031090~organelle membrane	472	5.20914	3.5972e-24	ENSMUSG00000037916, ENSMUSG00000030545, ENSMUSG00000038690, ENSMUSG00000025204, ENSMUSG00000025792, ENSMUSG00000039367, ENSMUSG00000003072, ENSMUSG00000028700, ENSMUSG00000030647, ENSMUSG00000033272, ENSMUSG00000026255, ENSMUSG00000039176, ENSMUSG00000006057, ENSMUSG00000026198, ENSMUSG00000038417, ENSMUSG00000022956, ENSMUSG00000046378, ENSMUSG00000025484, ENSMUSG00000033379, ENSMUSG00000033475,…	5158	809	12504	1.41436	2.79862e-21	2.33219e-22	5.50149e-21
GOTERM_CC_FAT	GO:0031967~organelle envelope	334	3.68613	7.33003e-23	ENSMUSG00000037916, ENSMUSG00000070425, ENSMUSG00000000131, ENSMUSG00000038690, ENSMUSG00000050856, ENSMUSG00000043940, ENSMUSG00000058076, ENSMUSG00000025204, ENSMUSG00000025792, ENSMUSG00000042590, ENSMUSG00000003072, ENSMUSG00000030647, ENSMUSG00000026255, ENSMUSG00000039176, ENSMUSG00000006057, ENSMUSG00000026198, ENSMUSG00000021265, ENSMUSG00000022956, ENSMUSG00000040034, ENSMUSG00000050192,…	5158	540	12504	1.49941	5.70276e-20	4.38674e-21	1.12104e-19
GOTERM_CC_FAT	GO:0031975~envelope	334	3.68613	1.76081e-22	ENSMUSG00000037916, ENSMUSG00000070425, ENSMUSG00000000131, ENSMUSG00000038690, ENSMUSG00000050856, ENSMUSG00000043940, ENSMUSG00000058076, ENSMUSG00000025204, ENSMUSG00000025792, ENSMUSG00000042590, ENSMUSG00000003072, ENSMUSG00000030647, ENSMUSG00000026255, ENSMUSG00000039176, ENSMUSG00000006057, ENSMUSG00000026198, ENSMUSG00000021265, ENSMUSG00000022956, ENSMUSG00000040034, ENSMUSG00000050192,…	5158	542	12504	1.49388	1.36991e-19	9.78506e-21	2.69294e-19
GOTERM_CC_FAT	GO:0015630~microtubule cytoskeleton	284	3.13431	2.32109e-21	ENSMUSG00000024269, ENSMUSG00000058070, ENSMUSG00000029381, ENSMUSG00000025795, ENSMUSG00000019773, ENSMUSG00000027654, ENSMUSG00000018707, ENSMUSG00000023764, ENSMUSG00000032254, ENSMUSG00000019370, ENSMUSG00000043051, ENSMUSG00000018509, ENSMUSG00000027254, ENSMUSG00000036438, ENSMUSG00000027459, ENSMUSG00000031787, ENSMUSG00000031788, ENSMUSG00000035437, ENSMUSG00000062380, ENSMUSG00000035439,…	5158	450	12504	1.52994	1.80581e-18	1.20387e-19	3.54983e-18
GOTERM_CC_FAT	GO:0012505~endomembrane system	327	3.60887	3.26156e-21	ENSMUSG00000039361, ENSMUSG00000004319, ENSMUSG00000070425, ENSMUSG00000000131, ENSMUSG00000043940, ENSMUSG00000039367, ENSMUSG00000042590, ENSMUSG00000028700, ENSMUSG00000033272, ENSMUSG00000017721, ENSMUSG00000022957, ENSMUSG00000046378, ENSMUSG00000040034, ENSMUSG00000050192, ENSMUSG00000025484, ENSMUSG00000032640, ENSMUSG00000031791, ENSMUSG00000048661, ENSMUSG00000025789, ENSMUSG00000027642,…	5158	535	12504	1.4817	2.53749e-18	1.58593e-19	4.98816e-18
GOTERM_CC_FAT	GO:0044427~chromosomal part	213	2.35073	1.20681e-20	ENSMUSG00000032397, ENSMUSG00000030254, ENSMUSG00000069272, ENSMUSG00000069274, ENSMUSG00000019777, ENSMUSG00000056895, ENSMUSG00000025480, ENSMUSG00000018509, ENSMUSG00000040034, ENSMUSG00000035576, ENSMUSG00000069268, ENSMUSG00000069266, ENSMUSG00000009575, ENSMUSG00000040044, ENSMUSG00000049232, ENSMUSG00000026646, ENSMUSG00000022391, ENSMUSG00000047246, ENSMUSG00000025395, ENSMUSG00000036036,…	5158	318	12504	1.62375	9.38901e-18	5.52295e-19	1.84568e-17
GOTERM_CC_FAT	GO:0005840~ribosome	143	1.57819	1.53352e-20	ENSMUSG00000062647, ENSMUSG00000022706, ENSMUSG00000032399, ENSMUSG00000029614, ENSMUSG00000025794, ENSMUSG00000000740, ENSMUSG00000071415, ENSMUSG00000062997, ENSMUSG00000037563, ENSMUSG00000060636, ENSMUSG00000024829, ENSMUSG00000034932, ENSMUSG00000020477, ENSMUSG00000025208, ENSMUSG00000048758, ENSMUSG00000025508, ENSMUSG00000021731, ENSMUSG00000034892, ENSMUSG00000058546, ENSMUSG00000063316,…	5158	192	12504	1.80552	1.19308e-17	6.62823e-19	2.34534e-17
GOTERM_CC_FAT	GO:0044429~mitochondrial part	315	3.47644	6.20937e-19	ENSMUSG00000037916, ENSMUSG00000038690, ENSMUSG00000050856, ENSMUSG00000058076, ENSMUSG00000025204, ENSMUSG00000025792, ENSMUSG00000003072, ENSMUSG00000030647, ENSMUSG00000026255, ENSMUSG00000043572, ENSMUSG00000039176, ENSMUSG00000006057, ENSMUSG00000026198, ENSMUSG00000021265, ENSMUSG00000022956, ENSMUSG00000033475, ENSMUSG00000025209, ENSMUSG00000025208, ENSMUSG00000027452, ENSMUSG00000049225,…	5158	524	12504	1.45729	4.83089e-16	2.54257e-17	9.49648e-16
GOTERM_CC_FAT	GO:0005829~cytosol	324	3.57576	8.68896e-18	ENSMUSG00000071866, ENSMUSG00000021127, ENSMUSG00000001018, ENSMUSG00000027510, ENSMUSG00000033065, ENSMUSG00000022503, ENSMUSG00000002797, ENSMUSG00000029580, ENSMUSG00000027254, ENSMUSG00000022789, ENSMUSG00000019979, ENSMUSG00000025487, ENSMUSG00000025485, ENSMUSG00000035437, ENSMUSG00000019971, ENSMUSG00000025509, ENSMUSG00000001525, ENSMUSG00000029993, ENSMUSG00000054855, ENSMUSG00000057342,…	5158	549	12504	1.43067	6.76001e-15	3.38e-16	1.32887e-14
GOTERM_CC_FAT	GO:0048471~perinuclear region of cytoplasm	131	1.44576	1.23044e-14	ENSMUSG00000044562, ENSMUSG00000038241, ENSMUSG00000022455, ENSMUSG00000020074, ENSMUSG00000075376, ENSMUSG00000022781, ENSMUSG00000052707, ENSMUSG00000029713, ENSMUSG00000019261, ENSMUSG00000031642, ENSMUSG00000030533, ENSMUSG00000025979, ENSMUSG00000042628, ENSMUSG00000027500, ENSMUSG00000028165, ENSMUSG00000010517, ENSMUSG00000039956, ENSMUSG00000062234, ENSMUSG00000056820, ENSMUSG00000022391,…	5158	189	12504	1.68026	9.58766e-12	4.56524e-13	1.88516e-11
GOTERM_CC_FAT	GO:0000228~nuclear chromosome	92	1.01534	2.58357e-14	ENSMUSG00000032397, ENSMUSG00000005370, ENSMUSG00000025925, ENSMUSG00000030254, ENSMUSG00000022702, ENSMUSG00000028884, ENSMUSG00000060743, ENSMUSG00000063049, ENSMUSG00000024054, ENSMUSG00000025480, ENSMUSG00000056758, ENSMUSG00000018537, ENSMUSG00000024325, ENSMUSG00000038000, ENSMUSG00000038331, ENSMUSG00000031609, ENSMUSG00000032481, ENSMUSG00000032409, ENSMUSG00000000902, ENSMUSG00000031921,…	5158	121	12504	1.84319	2.01255e-11	9.14824e-13	3.95572e-11
GOTERM_CC_FAT	GO:0044454~nuclear chromosome part	81	0.893941	4.35356e-14	ENSMUSG00000032397, ENSMUSG00000005370, ENSMUSG00000025925, ENSMUSG00000030254, ENSMUSG00000022702, ENSMUSG00000028884, ENSMUSG00000060743, ENSMUSG00000063049, ENSMUSG00000024054, ENSMUSG00000025480, ENSMUSG00000018537, ENSMUSG00000024325, ENSMUSG00000038000, ENSMUSG00000038331, ENSMUSG00000031609, ENSMUSG00000032481, ENSMUSG00000032409, ENSMUSG00000000902, ENSMUSG00000031921, ENSMUSG00000032498,…	5158	103	12504	1.90641	3.38591e-11	1.47216e-12	6.65579e-11
GOTERM_CC_FAT	GO:0005681~spliceosome	93	1.02638	7.64207e-14	ENSMUSG00000040767, ENSMUSG00000040383, ENSMUSG00000021413, ENSMUSG00000074088, ENSMUSG00000028809, ENSMUSG00000028882, ENSMUSG00000019470, ENSMUSG00000055760, ENSMUSG00000040824, ENSMUSG00000023932, ENSMUSG00000059208, ENSMUSG00000034931, ENSMUSG00000059005, ENSMUSG00000016018, ENSMUSG00000002455, ENSMUSG00000028902, ENSMUSG00000005687, ENSMUSG00000033732, ENSMUSG00000021039, ENSMUSG00000020409,…	5158	124	12504	1.81815	5.94262e-11	2.47613e-12	1.16818e-10
GOTERM_CC_FAT	GO:0019866~organelle inner membrane	194	2.14104	9.06996e-14	ENSMUSG00000037916, ENSMUSG00000050856, ENSMUSG00000038690, ENSMUSG00000058076, ENSMUSG00000025204, ENSMUSG00000025792, ENSMUSG00000030647, ENSMUSG00000003072, ENSMUSG00000026255, ENSMUSG00000039176, ENSMUSG00000006057, ENSMUSG00000021265, ENSMUSG00000022956, ENSMUSG00000030541, ENSMUSG00000048661, ENSMUSG00000032263, ENSMUSG00000020402, ENSMUSG00000040048, ENSMUSG00000061904, ENSMUSG00000025393,…	5158	312	12504	1.50735	7.05687e-11	2.82274e-12	1.38722e-10
GOTERM_CC_FAT	GO:0005794~Golgi apparatus	373	4.11654	4.24175e-13	ENSMUSG00000039361, ENSMUSG00000004319, ENSMUSG00000070425, ENSMUSG00000031504, ENSMUSG00000044562, ENSMUSG00000039367, ENSMUSG00000028700, ENSMUSG00000033272, ENSMUSG00000004415, ENSMUSG00000027864, ENSMUSG00000027255, ENSMUSG00000027455, ENSMUSG00000022500, ENSMUSG00000031642, ENSMUSG00000025484, ENSMUSG00000031788, ENSMUSG00000027257, ENSMUSG00000073421, ENSMUSG00000032640, ENSMUSG00000034040,…	5158	682	12504	1.32584	3.3004e-10	1.26938e-11	6.48792e-10
GOTERM_CC_FAT	GO:0005740~mitochondrial envelope	231	2.54939	8.75505e-13	ENSMUSG00000037916, ENSMUSG00000038690, ENSMUSG00000050856, ENSMUSG00000058076, ENSMUSG00000025204, ENSMUSG00000025792, ENSMUSG00000003072, ENSMUSG00000030647, ENSMUSG00000026255, ENSMUSG00000039176, ENSMUSG00000006057, ENSMUSG00000026198, ENSMUSG00000021265, ENSMUSG00000022956, ENSMUSG00000033475, ENSMUSG00000030541, ENSMUSG00000073422, ENSMUSG00000032263, ENSMUSG00000020402, ENSMUSG00000040048,…	5158	391	12504	1.4322	6.81156e-10	2.5228e-11	1.33901e-09
GOTERM_CC_FAT	GO:0031966~mitochondrial membrane	218	2.40592	2.80802e-12	ENSMUSG00000037916, ENSMUSG00000050856, ENSMUSG00000038690, ENSMUSG00000058076, ENSMUSG00000025204, ENSMUSG00000025792, ENSMUSG00000003072, ENSMUSG00000030647, ENSMUSG00000026255, ENSMUSG00000039176, ENSMUSG00000006057, ENSMUSG00000026198, ENSMUSG00000021265, ENSMUSG00000022956, ENSMUSG00000033475, ENSMUSG00000030541, ENSMUSG00000032263, ENSMUSG00000020402, ENSMUSG00000040048, ENSMUSG00000029592,…	5158	368	12504	1.43607	2.18461e-09	7.80216e-11	4.29446e-09
GOTERM_CC_FAT	GO:0016604~nuclear body	100	1.10363	5.05806e-12	ENSMUSG00000028248, ENSMUSG00000031311, ENSMUSG00000038384, ENSMUSG00000026739, ENSMUSG00000055760, ENSMUSG00000041777, ENSMUSG00000081766, ENSMUSG00000020409, ENSMUSG00000025580, ENSMUSG00000028233, ENSMUSG00000022838, ENSMUSG00000021938, ENSMUSG00000021500, ENSMUSG00000001910, ENSMUSG00000018449, ENSMUSG00000018379, ENSMUSG00000078676, ENSMUSG00000020705, ENSMUSG00000029634, ENSMUSG00000078765,…	5158	142	12504	1.70718	3.93517e-09	1.35696e-10	7.7357e-09
GOTERM_CC_FAT	GO:0005874~microtubule	152	1.67752	7.04678e-12	ENSMUSG00000024269, ENSMUSG00000058070, ENSMUSG00000029381, ENSMUSG00000025795, ENSMUSG00000036768, ENSMUSG00000018707, ENSMUSG00000032254, ENSMUSG00000028059, ENSMUSG00000043051, ENSMUSG00000019261, ENSMUSG00000066306, ENSMUSG00000027254, ENSMUSG00000031787, ENSMUSG00000018387, ENSMUSG00000031788, ENSMUSG00000026849, ENSMUSG00000062380, ENSMUSG00000035439, ENSMUSG00000020483, ENSMUSG00000001525,…	5158	240	12504	1.53532	5.48242e-09	1.82747e-10	1.07772e-08
GOTERM_CC_FAT	GO:0005743~mitochondrial inner membrane	180	1.98654	1.22645e-11	ENSMUSG00000037916, ENSMUSG00000025968, ENSMUSG00000022450, ENSMUSG00000038690, ENSMUSG00000050856, ENSMUSG00000031974, ENSMUSG00000027384, ENSMUSG00000058076, ENSMUSG00000025204, ENSMUSG00000038717, ENSMUSG00000025792, ENSMUSG00000030647, ENSMUSG00000018042, ENSMUSG00000021079, ENSMUSG00000003072, ENSMUSG00000026255, ENSMUSG00000032449, ENSMUSG00000039176, ENSMUSG00000028982, ENSMUSG00000006057,…	5158	296	12504	1.47417	9.5418e-09	3.078e-10	1.87571e-08
GOTERM_CC_FAT	GO:0005667~transcription factor complex	148	1.63337	1.58323e-11	ENSMUSG00000033837, ENSMUSG00000000134, ENSMUSG00000055044, ENSMUSG00000024968, ENSMUSG00000021109, ENSMUSG00000038718, ENSMUSG00000031585, ENSMUSG00000046179, ENSMUSG00000006058, ENSMUSG00000029238, ENSMUSG00000028707, ENSMUSG00000021264, ENSMUSG00000026735, ENSMUSG00000037373, ENSMUSG00000000346, ENSMUSG00000031314, ENSMUSG00000001524, ENSMUSG00000074622, ENSMUSG00000071359, ENSMUSG00000025782,…	5158	234	12504	1.53325	1.23176e-08	3.84924e-10	2.42137e-08
GOTERM_CC_FAT	GO:0005635~nuclear envelope	105	1.15881	1.71434e-11	ENSMUSG00000000131, ENSMUSG00000070425, ENSMUSG00000043940, ENSMUSG00000042590, ENSMUSG00000020074, ENSMUSG00000020377, ENSMUSG00000040034, ENSMUSG00000050192, ENSMUSG00000023830, ENSMUSG00000031791, ENSMUSG00000048661, ENSMUSG00000042524, ENSMUSG00000028063, ENSMUSG00000001855, ENSMUSG00000053293, ENSMUSG00000029501, ENSMUSG00000010517, ENSMUSG00000019969, ENSMUSG00000033365, ENSMUSG00000029361,…	5158	153	12504	1.66366	1.33376e-08	4.04169e-10	2.62188e-08
GOTERM_CC_FAT	GO:0005856~cytoskeleton	562	6.20241	3.35304e-10	ENSMUSG00000024269, ENSMUSG00000025795, ENSMUSG00000019773, ENSMUSG00000027654, ENSMUSG00000028906, ENSMUSG00000018707, ENSMUSG00000037815, ENSMUSG00000019370, ENSMUSG00000029580, ENSMUSG00000039943, ENSMUSG00000018509, ENSMUSG00000027459, ENSMUSG00000029684, ENSMUSG00000003279, ENSMUSG00000053693, ENSMUSG00000019971, ENSMUSG00000019578, ENSMUSG00000075415, ENSMUSG00000035198, ENSMUSG00000035299,…	5158	1122	12504	1.21426	2.60866e-07	7.67254e-09	5.12807e-07
GOTERM_CC_FAT	GO:0005815~microtubule organizing center	119	1.31332	2.72366e-09	ENSMUSG00000033585, ENSMUSG00000038241, ENSMUSG00000023764, ENSMUSG00000026944, ENSMUSG00000043051, ENSMUSG00000039842, ENSMUSG00000027459, ENSMUSG00000056919, ENSMUSG00000031787, ENSMUSG00000035437, ENSMUSG00000035439, ENSMUSG00000019971, ENSMUSG00000063439, ENSMUSG00000019578, ENSMUSG00000020687, ENSMUSG00000020308, ENSMUSG00000035198, ENSMUSG00000051786, ENSMUSG00000021068, ENSMUSG00000031592,…	5158	189	12504	1.52635	2.11901e-06	6.05431e-08	4.16551e-06
GOTERM_CC_FAT	GO:0005759~mitochondrial matrix	105	1.15881	4.29522e-09	ENSMUSG00000022706, ENSMUSG00000074210, ENSMUSG00000043572, ENSMUSG00000039176, ENSMUSG00000020079, ENSMUSG00000024158, ENSMUSG00000020477, ENSMUSG00000025209, ENSMUSG00000025208, ENSMUSG00000049225, ENSMUSG00000035202, ENSMUSG00000027452, ENSMUSG00000004610, ENSMUSG00000019143, ENSMUSG00000032786, ENSMUSG00000037772, ENSMUSG00000032263, ENSMUSG00000018446, ENSMUSG00000030934, ENSMUSG00000024782,…	5158	163	12504	1.5616	3.34168e-06	9.28245e-08	6.56902e-06
GOTERM_CC_FAT	GO:0031980~mitochondrial lumen	105	1.15881	4.29522e-09	ENSMUSG00000022706, ENSMUSG00000074210, ENSMUSG00000043572, ENSMUSG00000039176, ENSMUSG00000020079, ENSMUSG00000024158, ENSMUSG00000020477, ENSMUSG00000025209, ENSMUSG00000025208, ENSMUSG00000049225, ENSMUSG00000035202, ENSMUSG00000027452, ENSMUSG00000004610, ENSMUSG00000019143, ENSMUSG00000032786, ENSMUSG00000037772, ENSMUSG00000032263, ENSMUSG00000018446, ENSMUSG00000030934, ENSMUSG00000024782,…	5158	163	12504	1.5616	3.34168e-06	9.28245e-08	6.56902e-06
GOTERM_CC_FAT	GO:0000785~chromatin	106	1.16985	4.48175e-09	ENSMUSG00000032397, ENSMUSG00000030254, ENSMUSG00000069272, ENSMUSG00000022702, ENSMUSG00000069274, ENSMUSG00000005470, ENSMUSG00000060743, ENSMUSG00000019777, ENSMUSG00000056895, ENSMUSG00000024054, ENSMUSG00000035576, ENSMUSG00000046711, ENSMUSG00000000730, ENSMUSG00000069268, ENSMUSG00000020086, ENSMUSG00000069266, ENSMUSG00000063576, ENSMUSG00000009575, ENSMUSG00000031860, ENSMUSG00000050936,…	5158	165	12504	1.55736	3.4868e-06	9.42379e-08	6.8543e-06
GOTERM_CC_FAT	GO:0000775~chromosome, centromeric region	77	0.849796	5.46607e-09	ENSMUSG00000064302, ENSMUSG00000025144, ENSMUSG00000042557, ENSMUSG00000000708, ENSMUSG00000032400, ENSMUSG00000018509, ENSMUSG00000005233, ENSMUSG00000040034, ENSMUSG00000072980, ENSMUSG00000024056, ENSMUSG00000075266, ENSMUSG00000028873, ENSMUSG00000045098, ENSMUSG00000026708, ENSMUSG00000020739, ENSMUSG00000026683, ENSMUSG00000030801, ENSMUSG00000028549, ENSMUSG00000026605, ENSMUSG00000009575,…	5158	111	12504	1.68165	4.2526e-06	1.11911e-07	8.3597e-06
GOTERM_CC_FAT	GO:0005813~centrosome	103	1.13674	6.45619e-09	ENSMUSG00000033585, ENSMUSG00000038241, ENSMUSG00000023764, ENSMUSG00000043051, ENSMUSG00000039842, ENSMUSG00000027459, ENSMUSG00000056919, ENSMUSG00000031787, ENSMUSG00000035437, ENSMUSG00000035439, ENSMUSG00000019971, ENSMUSG00000019578, ENSMUSG00000020687, ENSMUSG00000020308, ENSMUSG00000035198, ENSMUSG00000021068, ENSMUSG00000031592, ENSMUSG00000029790, ENSMUSG00000079553, ENSMUSG00000039577,…	5158	160	12504	1.56058	5.0229e-06	1.28793e-07	9.87397e-06
GOTERM_CC_FAT	GO:0000793~condensed chromosome	74	0.816687	1.38651e-08	ENSMUSG00000064302, ENSMUSG00000032400, ENSMUSG00000020430, ENSMUSG00000017146, ENSMUSG00000025480, ENSMUSG00000005233, ENSMUSG00000018509, ENSMUSG00000040034, ENSMUSG00000035576, ENSMUSG00000032498, ENSMUSG00000024056, ENSMUSG00000029646, ENSMUSG00000042524, ENSMUSG00000035198, ENSMUSG00000045098, ENSMUSG00000000730, ENSMUSG00000020739, ENSMUSG00000026683, ENSMUSG00000026605, ENSMUSG00000025026,…	5158	107	12504	1.67655	1.0787e-05	2.69677e-07	2.1205e-05
GOTERM_CC_FAT	GO:0000790~nuclear chromatin	44	0.485598	2.46403e-08	ENSMUSG00000032397, ENSMUSG00000005370, ENSMUSG00000030254, ENSMUSG00000022702, ENSMUSG00000060743, ENSMUSG00000016559, ENSMUSG00000063049, ENSMUSG00000024054, ENSMUSG00000005566, ENSMUSG00000018537, ENSMUSG00000024325, ENSMUSG00000031609, ENSMUSG00000038331, ENSMUSG00000032481, ENSMUSG00000029836, ENSMUSG00000032409, ENSMUSG00000031622, ENSMUSG00000000902, ENSMUSG00000022009, ENSMUSG00000030619,…	5158	55	12504	1.93936	1.917e-05	4.67565e-07	3.76844e-05
GOTERM_CC_FAT	GO:0044431~Golgi apparatus part	135	1.4899	3.86903e-08	ENSMUSG00000070425, ENSMUSG00000044562, ENSMUSG00000040236, ENSMUSG00000056812, ENSMUSG00000039367, ENSMUSG00000022842, ENSMUSG00000028700, ENSMUSG00000033272, ENSMUSG00000027198, ENSMUSG00000015653, ENSMUSG00000056429, ENSMUSG00000027455, ENSMUSG00000050796, ENSMUSG00000025484, ENSMUSG00000006800, ENSMUSG00000023830, ENSMUSG00000027257, ENSMUSG00000032640, ENSMUSG00000030059, ENSMUSG00000034893,…	5158	227	12504	1.4417	3.01006e-05	7.16692e-07	5.91722e-05
GOTERM_CC_FAT	GO:0005643~nuclear pore	46	0.50767	4.49484e-08	ENSMUSG00000003226, ENSMUSG00000055334, ENSMUSG00000022142, ENSMUSG00000000131, ENSMUSG00000052798, ENSMUSG00000001440, ENSMUSG00000042590, ENSMUSG00000035351, ENSMUSG00000030298, ENSMUSG00000032939, ENSMUSG00000040034, ENSMUSG00000050192, ENSMUSG00000030662, ENSMUSG00000018362, ENSMUSG00000057322, ENSMUSG00000015023, ENSMUSG00000026999, ENSMUSG00000016619, ENSMUSG00000020739, ENSMUSG00000078812,…	5158	59	12504	1.89005	3.49693e-05	8.13253e-07	6.87432e-05
GOTERM_CC_FAT	GO:0009898~internal side of plasma membrane	164	1.80995	5.71314e-08	ENSMUSG00000031442, ENSMUSG00000019428, ENSMUSG00000031979, ENSMUSG00000001018, ENSMUSG00000043940, ENSMUSG00000029434, ENSMUSG00000018042, ENSMUSG00000029518, ENSMUSG00000038387, ENSMUSG00000037815, ENSMUSG00000030643, ENSMUSG00000027255, ENSMUSG00000022500, ENSMUSG00000021823, ENSMUSG00000050192, ENSMUSG00000022841, ENSMUSG00000026433, ENSMUSG00000020882, ENSMUSG00000022438, ENSMUSG00000053693,…	5158	287	12504	1.38525	4.44472e-05	1.01019e-06	8.73755e-05
GOTERM_CC_FAT	GO:0016607~nuclear speck	63	0.695287	9.74973e-08	ENSMUSG00000028248, ENSMUSG00000030216, ENSMUSG00000028809, ENSMUSG00000028882, ENSMUSG00000038384, ENSMUSG00000008730, ENSMUSG00000028676, ENSMUSG00000029474, ENSMUSG00000041777, ENSMUSG00000000787, ENSMUSG00000023932, ENSMUSG00000024325, ENSMUSG00000027829, ENSMUSG00000029068, ENSMUSG00000057113, ENSMUSG00000020409, ENSMUSG00000007817, ENSMUSG00000042133, ENSMUSG00000025580, ENSMUSG00000036180,…	5158	90	12504	1.69694	7.585e-05	1.68562e-06	0.00014911
GOTERM_CC_FAT	GO:0005768~endosome	146	1.6113	1.031e-07	ENSMUSG00000004319, ENSMUSG00000006906, ENSMUSG00000020375, ENSMUSG00000018774, ENSMUSG00000029434, ENSMUSG00000020078, ENSMUSG00000006058, ENSMUSG00000015653, ENSMUSG00000030452, ENSMUSG00000038417, ENSMUSG00000033379, ENSMUSG00000034109, ENSMUSG00000028788, ENSMUSG00000040760, ENSMUSG00000023830, ENSMUSG00000024772, ENSMUSG00000031447, ENSMUSG00000073421, ENSMUSG00000027519, ENSMUSG00000042524,…	5158	252	12504	1.40449	8.02088e-05	1.74374e-06	0.000157679
GOTERM_CC_FAT	GO:0044430~cytoskeletal part	389	4.29312	1.59848e-07	ENSMUSG00000024269, ENSMUSG00000025795, ENSMUSG00000019773, ENSMUSG00000027654, ENSMUSG00000018707, ENSMUSG00000019370, ENSMUSG00000018509, ENSMUSG00000039943, ENSMUSG00000027459, ENSMUSG00000003279, ENSMUSG00000019971, ENSMUSG00000019578, ENSMUSG00000035198, ENSMUSG00000035299, ENSMUSG00000022114, ENSMUSG00000029790, ENSMUSG00000020900, ENSMUSG00000006457, ENSMUSG00000039577, ENSMUSG00000019969,…	5158	774	12504	1.21836	0.000124354	2.64599e-06	0.000244468
GOTERM_CC_FAT	GO:0033279~ribosomal subunit	49	0.540779	2.04467e-07	ENSMUSG00000047215, ENSMUSG00000046756, ENSMUSG00000037563, ENSMUSG00000022889, ENSMUSG00000020477, ENSMUSG00000029066, ENSMUSG00000025208, ENSMUSG00000022601, ENSMUSG00000023723, ENSMUSG00000057113, ENSMUSG00000036850, ENSMUSG00000034892, ENSMUSG00000037772, ENSMUSG00000002767, ENSMUSG00000035772, ENSMUSG00000030744, ENSMUSG00000045948, ENSMUSG00000028234, ENSMUSG00000008682, ENSMUSG00000012848,…	5158	66	12504	1.79978	0.000159063	3.31407e-06	0.000312708
GOTERM_CC_FAT	GO:0005783~endoplasmic reticulum	417	4.60214	2.29279e-07	ENSMUSG00000046785, ENSMUSG00000025203, ENSMUSG00000029780, ENSMUSG00000020260, ENSMUSG00000039943, ENSMUSG00000046378, ENSMUSG00000019975, ENSMUSG00000050192, ENSMUSG00000025381, ENSMUSG00000019970, ENSMUSG00000030538, ENSMUSG00000027642, ENSMUSG00000034813, ENSMUSG00000023791, ENSMUSG00000053293, ENSMUSG00000024357, ENSMUSG00000039956, ENSMUSG00000020806, ENSMUSG00000019969, ENSMUSG00000039953,…	5158	838	12504	1.20631	0.000178363	3.64038e-06	0.000350654
GOTERM_CC_FAT	GO:0000792~heterochromatin	40	0.441452	3.19831e-07	ENSMUSG00000004099, ENSMUSG00000030254, ENSMUSG00000060743, ENSMUSG00000035478, ENSMUSG00000019777, ENSMUSG00000016559, ENSMUSG00000024054, ENSMUSG00000028800, ENSMUSG00000005566, ENSMUSG00000018537, ENSMUSG00000024325, ENSMUSG00000040054, ENSMUSG00000002307, ENSMUSG00000032481, ENSMUSG00000029836, ENSMUSG00000032409, ENSMUSG00000031622, ENSMUSG00000000902, ENSMUSG00000026037, ENSMUSG00000030619,…	5158	51	12504	1.90133	0.000248797	4.97655e-06	0.000489141
GOTERM_CC_FAT	GO:0044432~endoplasmic reticulum part	134	1.47887	3.28044e-07	ENSMUSG00000019428, ENSMUSG00000070425, ENSMUSG00000029616, ENSMUSG00000022844, ENSMUSG00000018042, ENSMUSG00000025823, ENSMUSG00000001467, ENSMUSG00000027198, ENSMUSG00000038383, ENSMUSG00000028980, ENSMUSG00000017721, ENSMUSG00000037470, ENSMUSG00000046378, ENSMUSG00000025198, ENSMUSG00000027963, ENSMUSG00000032042, ENSMUSG00000021313, ENSMUSG00000030062, ENSMUSG00000026849, ENSMUSG00000026848,…	5158	231	12504	1.40624	0.000255186	5.00427e-06	0.000501703
GOTERM_CC_FAT	GO:0000151~ubiquitin ligase complex	45	0.496634	4.46653e-07	ENSMUSG00000066892, ENSMUSG00000026988, ENSMUSG00000052139, ENSMUSG00000026965, ENSMUSG00000028960, ENSMUSG00000039615, ENSMUSG00000026739, ENSMUSG00000023977, ENSMUSG00000025578, ENSMUSG00000004364, ENSMUSG00000065990, ENSMUSG00000054115, ENSMUSG00000024019, ENSMUSG00000024807, ENSMUSG00000022663, ENSMUSG00000055401, ENSMUSG00000040327, ENSMUSG00000026196, ENSMUSG00000032216, ENSMUSG00000024325,…	5158	60	12504	1.81815	0.000347436	6.68259e-06	0.0006831
GOTERM_CC_FAT	GO:0005819~spindle	71	0.783578	9.98559e-07	ENSMUSG00000049086, ENSMUSG00000064302, ENSMUSG00000036768, ENSMUSG00000019773, ENSMUSG00000020745, ENSMUSG00000027654, ENSMUSG00000019370, ENSMUSG00000056752, ENSMUSG00000028059, ENSMUSG00000066306, ENSMUSG00000018509, ENSMUSG00000025035, ENSMUSG00000036438, ENSMUSG00000028849, ENSMUSG00000041775, ENSMUSG00000056919, ENSMUSG00000031787, ENSMUSG00000021866, ENSMUSG00000035439, ENSMUSG00000001175,…	5158	109	12504	1.57906	0.000776578	1.4658e-05	0.00152716
GOTERM_CC_FAT	GO:0031410~cytoplasmic vesicle	262	2.89151	1.61698e-06	ENSMUSG00000039361, ENSMUSG00000004319, ENSMUSG00000001018, ENSMUSG00000039367, ENSMUSG00000038696, ENSMUSG00000018507, ENSMUSG00000017721, ENSMUSG00000022957, ENSMUSG00000020122, ENSMUSG00000031788, ENSMUSG00000024772, ENSMUSG00000022269, ENSMUSG00000075415, ENSMUSG00000034813, ENSMUSG00000039959, ENSMUSG00000077450, ENSMUSG00000019969, ENSMUSG00000021270, ENSMUSG00000001918, ENSMUSG00000027248,…	5158	508	12504	1.25027	0.00125722	2.32963e-05	0.00247295
GOTERM_CC_FAT	GO:0031982~vesicle	267	2.94669	1.65917e-06	ENSMUSG00000039361, ENSMUSG00000004319, ENSMUSG00000001018, ENSMUSG00000039367, ENSMUSG00000038696, ENSMUSG00000018507, ENSMUSG00000017721, ENSMUSG00000022957, ENSMUSG00000020122, ENSMUSG00000031788, ENSMUSG00000024772, ENSMUSG00000022269, ENSMUSG00000075415, ENSMUSG00000034813, ENSMUSG00000039959, ENSMUSG00000077450, ENSMUSG00000019969, ENSMUSG00000021270, ENSMUSG00000001918, ENSMUSG00000027248,…	5158	519	12504	1.24713	0.00129	2.34695e-05	0.00253747
GOTERM_CC_FAT	GO:0046930~pore complex	51	0.562852	2.19952e-06	ENSMUSG00000003226, ENSMUSG00000055334, ENSMUSG00000000131, ENSMUSG00000042590, ENSMUSG00000030298, ENSMUSG00000032939, ENSMUSG00000040034, ENSMUSG00000050192, ENSMUSG00000021771, ENSMUSG00000020739, ENSMUSG00000020402, ENSMUSG00000009470, ENSMUSG00000001855, ENSMUSG00000053293, ENSMUSG00000036992, ENSMUSG00000031691, ENSMUSG00000033365, ENSMUSG00000028435, ENSMUSG00000017774, ENSMUSG00000066232,…	5158	73	12504	1.69362	0.00170976	3.05571e-05	0.00336384
GOTERM_CC_FAT	GO:0019898~extrinsic to membrane	244	2.69286	3.03386e-06	ENSMUSG00000036533, ENSMUSG00000043940, ENSMUSG00000028906, ENSMUSG00000035954, ENSMUSG00000038696, ENSMUSG00000022789, ENSMUSG00000003279, ENSMUSG00000031788, ENSMUSG00000024772, ENSMUSG00000032637, ENSMUSG00000000001, ENSMUSG00000022770, ENSMUSG00000035941, ENSMUSG00000029361, ENSMUSG00000059714, ENSMUSG00000038816, ENSMUSG00000025221, ENSMUSG00000009073, ENSMUSG00000035933, ENSMUSG00000026754,…	5158	472	12504	1.25319	0.00235756	4.14087e-05	0.00463982
GOTERM_CC_FAT	GO:0005720~nuclear heterochromatin	29	0.320053	3.20477e-06	ENSMUSG00000030254, ENSMUSG00000060743, ENSMUSG00000016559, ENSMUSG00000024054, ENSMUSG00000005566, ENSMUSG00000018537, ENSMUSG00000024325, ENSMUSG00000032481, ENSMUSG00000029836, ENSMUSG00000032409, ENSMUSG00000031622, ENSMUSG00000000902, ENSMUSG00000030619, ENSMUSG00000034748, ENSMUSG00000032187, ENSMUSG00000020661, ENSMUSG00000000730, ENSMUSG00000020086, ENSMUSG00000027478, ENSMUSG00000049932,…	5158	35	12504	2.00862	0.00249021	4.29872e-05	0.00490119
GOTERM_CC_FAT	GO:0000123~histone acetyltransferase complex	24	0.264871	3.28014e-06	ENSMUSG00000020171, ENSMUSG00000022338, ENSMUSG00000062270, ENSMUSG00000030330, ENSMUSG00000025764, ENSMUSG00000028899, ENSMUSG00000038909, ENSMUSG00000026283, ENSMUSG00000000708, ENSMUSG00000055024, ENSMUSG00000020918, ENSMUSG00000027671, ENSMUSG00000024926, ENSMUSG00000028863, ENSMUSG00000009640, ENSMUSG00000027569, ENSMUSG00000048930, ENSMUSG00000003868, ENSMUSG00000029670, ENSMUSG00000031540,…	5158	27	12504	2.15484	0.0025487	4.32525e-05	0.00501646
GOTERM_CC_FAT	GO:0034399~nuclear periphery	37	0.408343	4.68511e-06	ENSMUSG00000004880, ENSMUSG00000062075, ENSMUSG00000061360, ENSMUSG00000033585, ENSMUSG00000028809, ENSMUSG00000024287, ENSMUSG00000027342, ENSMUSG00000024560, ENSMUSG00000036986, ENSMUSG00000066306, ENSMUSG00000028820, ENSMUSG00000027613, ENSMUSG00000021264, ENSMUSG00000022009, ENSMUSG00000020661, ENSMUSG00000011751, ENSMUSG00000042133, ENSMUSG00000027525, ENSMUSG00000028063, ENSMUSG00000059791,…	5158	49	12504	1.83051	0.00363839	6.07485e-05	0.00716507
GOTERM_CC_FAT	GO:0000776~kinetochore	43	0.474561	2.16677e-05	ENSMUSG00000020492, ENSMUSG00000064302, ENSMUSG00000052798, ENSMUSG00000042557, ENSMUSG00000000708, ENSMUSG00000027635, ENSMUSG00000074476, ENSMUSG00000041133, ENSMUSG00000035351, ENSMUSG00000032400, ENSMUSG00000045273, ENSMUSG00000029414, ENSMUSG00000031629, ENSMUSG00000033392, ENSMUSG00000018509, ENSMUSG00000005233, ENSMUSG00000040034, ENSMUSG00000022521, ENSMUSG00000005871, ENSMUSG00000042323,…	5158	62	12504	1.6813	0.0167164	0.000276317	0.033133
GOTERM_CC_FAT	GO:0031252~cell leading edge	69	0.761505	2.35854e-05	ENSMUSG00000031442, ENSMUSG00000033278, ENSMUSG00000070425, ENSMUSG00000018001, ENSMUSG00000020476, ENSMUSG00000029516, ENSMUSG00000020745, ENSMUSG00000030733, ENSMUSG00000037815, ENSMUSG00000022957, ENSMUSG00000022995, ENSMUSG00000031642, ENSMUSG00000021262, ENSMUSG00000022788, ENSMUSG00000028745, ENSMUSG00000032491, ENSMUSG00000029684, ENSMUSG00000022607, ENSMUSG00000032740, ENSMUSG00000027002,…	5158	112	12504	1.49348	0.0181823	0.000295918	0.0360649
GOTERM_CC_FAT	GO:0048770~pigment granule	55	0.606997	2.66559e-05	ENSMUSG00000026880, ENSMUSG00000001424, ENSMUSG00000029430, ENSMUSG00000029616, ENSMUSG00000018340, ENSMUSG00000007891, ENSMUSG00000015656, ENSMUSG00000020849, ENSMUSG00000079477, ENSMUSG00000029518, ENSMUSG00000025823, ENSMUSG00000047187, ENSMUSG00000018507, ENSMUSG00000037720, ENSMUSG00000071650, ENSMUSG00000028645, ENSMUSG00000020570, ENSMUSG00000030062, ENSMUSG00000031447, ENSMUSG00000021866,…	5158	85	12504	1.5686	0.020525	0.000329129	0.0407592
GOTERM_CC_FAT	GO:0042470~melanosome	55	0.606997	2.66559e-05	ENSMUSG00000026880, ENSMUSG00000001424, ENSMUSG00000029430, ENSMUSG00000029616, ENSMUSG00000018340, ENSMUSG00000007891, ENSMUSG00000015656, ENSMUSG00000020849, ENSMUSG00000079477, ENSMUSG00000029518, ENSMUSG00000025823, ENSMUSG00000047187, ENSMUSG00000018507, ENSMUSG00000037720, ENSMUSG00000071650, ENSMUSG00000028645, ENSMUSG00000020570, ENSMUSG00000030062, ENSMUSG00000031447, ENSMUSG00000021866,…	5158	85	12504	1.5686	0.020525	0.000329129	0.0407592
GOTERM_CC_FAT	GO:0005769~early endosome	39	0.430416	2.67372e-05	ENSMUSG00000021910, ENSMUSG00000050732, ENSMUSG00000047037, ENSMUSG00000004319, ENSMUSG00000042870, ENSMUSG00000028868, ENSMUSG00000015653, ENSMUSG00000030452, ENSMUSG00000036989, ENSMUSG00000034867, ENSMUSG00000020817, ENSMUSG00000041845, ENSMUSG00000028788, ENSMUSG00000036499, ENSMUSG00000027411, ENSMUSG00000024301, ENSMUSG00000024772, ENSMUSG00000073421, ENSMUSG00000028136, ENSMUSG00000002059,…	5158	55	12504	1.71897	0.0205869	0.000324975	0.0408834
GOTERM_CC_FAT	GO:0031988~membrane-bounded vesicle	214	2.36177	4.21871e-05	ENSMUSG00000039361, ENSMUSG00000004319, ENSMUSG00000039367, ENSMUSG00000038696, ENSMUSG00000018507, ENSMUSG00000017721, ENSMUSG00000022957, ENSMUSG00000020122, ENSMUSG00000024772, ENSMUSG00000075415, ENSMUSG00000034813, ENSMUSG00000039959, ENSMUSG00000077450, ENSMUSG00000021270, ENSMUSG00000001918, ENSMUSG00000027248, ENSMUSG00000029361, ENSMUSG00000059714, ENSMUSG00000017831, ENSMUSG00000063260,…	5158	420	12504	1.23519	0.0322894	0.00050483	0.0645006
GOTERM_CC_FAT	GO:0005938~cell cortex	75	0.827723	5.23546e-05	ENSMUSG00000024425, ENSMUSG00000059248, ENSMUSG00000064302, ENSMUSG00000006219, ENSMUSG00000020476, ENSMUSG00000031402, ENSMUSG00000022456, ENSMUSG00000031543, ENSMUSG00000053799, ENSMUSG00000028906, ENSMUSG00000025401, ENSMUSG00000000486, ENSMUSG00000028649, ENSMUSG00000029580, ENSMUSG00000021357, ENSMUSG00000028745, ENSMUSG00000032300, ENSMUSG00000032737, ENSMUSG00000031068, ENSMUSG00000011751,…	5158	126	12504	1.44297	0.0399145	0.000616976	0.0800402
GOTERM_CC_FAT	GO:0000779~condensed chromosome, centromeric region	41	0.452489	5.9627e-05	ENSMUSG00000020492, ENSMUSG00000064302, ENSMUSG00000052798, ENSMUSG00000027635, ENSMUSG00000074476, ENSMUSG00000035351, ENSMUSG00000032400, ENSMUSG00000045273, ENSMUSG00000029414, ENSMUSG00000031629, ENSMUSG00000033392, ENSMUSG00000005233, ENSMUSG00000018509, ENSMUSG00000040034, ENSMUSG00000022521, ENSMUSG00000029836, ENSMUSG00000002055, ENSMUSG00000026039, ENSMUSG00000026037, ENSMUSG00000024056,…	5158	60	12504	1.65653	0.0453316	0.000692166	0.0911535
GOTERM_CC_FAT	GO:0016363~nuclear matrix	31	0.342126	7.13267e-05	ENSMUSG00000061360, ENSMUSG00000033585, ENSMUSG00000028809, ENSMUSG00000024287, ENSMUSG00000024560, ENSMUSG00000036986, ENSMUSG00000066306, ENSMUSG00000028820, ENSMUSG00000021264, ENSMUSG00000022009, ENSMUSG00000020661, ENSMUSG00000042133, ENSMUSG00000011751, ENSMUSG00000027525, ENSMUSG00000028063, ENSMUSG00000021694, ENSMUSG00000001157, ENSMUSG00000004934, ENSMUSG00000002625, ENSMUSG00000006678,…	5158	42	12504	1.78929	0.0539825	0.000815758	0.10903
GOTERM_CC_FAT	GO:0000932~cytoplasmic mRNA processing body	18	0.198654	7.43568e-05	ENSMUSG00000046139, ENSMUSG00000083325, ENSMUSG00000036698, ENSMUSG00000042500, ENSMUSG00000028675, ENSMUSG00000028842, ENSMUSG00000032097, ENSMUSG00000025103, ENSMUSG00000025586, ENSMUSG00000058301, ENSMUSG00000052707, ENSMUSG00000057706, ENSMUSG00000002803, ENSMUSG00000002227, ENSMUSG00000038957, ENSMUSG00000041530, ENSMUSG00000050966, ENSMUSG00000024472, ENSMUSG00000047888	5158	20	12504	2.18178	0.0562101	0.000838079	0.113659
GOTERM_CC_FAT	GO:0016023~cytoplasmic membrane-bounded vesicle	209	2.30659	0.000105445	ENSMUSG00000039361, ENSMUSG00000039367, ENSMUSG00000038696, ENSMUSG00000018507, ENSMUSG00000017721, ENSMUSG00000022957, ENSMUSG00000020122, ENSMUSG00000024772, ENSMUSG00000075415, ENSMUSG00000034813, ENSMUSG00000039959, ENSMUSG00000077450, ENSMUSG00000021270, ENSMUSG00000001918, ENSMUSG00000027248, ENSMUSG00000029361, ENSMUSG00000059714, ENSMUSG00000017831, ENSMUSG00000063260, ENSMUSG00000029767,…	5158	414	12504	1.22381	0.0787651	0.00117132	0.161143
GOTERM_CC_FAT	GO:0005905~coated pit	25	0.275908	0.000109659	ENSMUSG00000039361, ENSMUSG00000047547, ENSMUSG00000024924, ENSMUSG00000004849, ENSMUSG00000060279, ENSMUSG00000022841, ENSMUSG00000057230, ENSMUSG00000033577, ENSMUSG00000040249, ENSMUSG00000035152, ENSMUSG00000022892, ENSMUSG00000022150, ENSMUSG00000027070, ENSMUSG00000000915, ENSMUSG00000019518, ENSMUSG00000028478, ENSMUSG00000032193, ENSMUSG00000047126, ENSMUSG00000022305, ENSMUSG00000033419,…	5158	32	12504	1.8939	0.0817808	0.00120096	0.167578
GOTERM_CC_FAT	GO:0042995~cell projection	281	3.1012	0.000130521	ENSMUSG00000033278, ENSMUSG00000070425, ENSMUSG00000021109, ENSMUSG00000037815, ENSMUSG00000035954, ENSMUSG00000032259, ENSMUSG00000029581, ENSMUSG00000022957, ENSMUSG00000039943, ENSMUSG00000060261, ENSMUSG00000031642, ENSMUSG00000021262, ENSMUSG00000022788, ENSMUSG00000029684, ENSMUSG00000031787, ENSMUSG00000062380, ENSMUSG00000019971, ENSMUSG00000029168, ENSMUSG00000020308, ENSMUSG00000074030,…	5158	575	12504	1.18469	0.0965657	0.00140945	0.19943
GOTERM_CC_FAT	GO:0042175~nuclear envelope-endoplasmic reticulum network	90	0.993268	0.000155687	ENSMUSG00000036078, ENSMUSG00000019428, ENSMUSG00000039703, ENSMUSG00000041523, ENSMUSG00000070425, ENSMUSG00000036833, ENSMUSG00000025240, ENSMUSG00000050229, ENSMUSG00000031545, ENSMUSG00000018042, ENSMUSG00000028343, ENSMUSG00000001467, ENSMUSG00000028207, ENSMUSG00000019877, ENSMUSG00000027198, ENSMUSG00000041220, ENSMUSG00000038383, ENSMUSG00000017721, ENSMUSG00000027828, ENSMUSG00000046378,…	5158	160	12504	1.36361	0.114085	0.00165799	0.23784
GOTERM_CC_FAT	GO:0015935~small ribosomal subunit	23	0.253835	0.000160983	ENSMUSG00000063457, ENSMUSG00000034892, ENSMUSG00000006333, ENSMUSG00000032459, ENSMUSG00000035772, ENSMUSG00000058267, ENSMUSG00000061787, ENSMUSG00000030744, ENSMUSG00000045948, ENSMUSG00000028234, ENSMUSG00000046756, ENSMUSG00000044533, ENSMUSG00000037563, ENSMUSG00000032518, ENSMUSG00000012848, ENSMUSG00000058174, ENSMUSG00000020477, ENSMUSG00000014551, ENSMUSG00000031320, ENSMUSG00000040952,…	5158	29	12504	1.92264	0.117728	0.0016912	0.24592
GOTERM_CC_FAT	GO:0031301~integral to organelle membrane	55	0.606997	0.000162237	ENSMUSG00000019428, ENSMUSG00000024425, ENSMUSG00000030545, ENSMUSG00000035505, ENSMUSG00000041523, ENSMUSG00000056812, ENSMUSG00000031545, ENSMUSG00000028207, ENSMUSG00000028538, ENSMUSG00000015653, ENSMUSG00000038383, ENSMUSG00000041220, ENSMUSG00000022885, ENSMUSG00000017721, ENSMUSG00000027828, ENSMUSG00000046378, ENSMUSG00000044857, ENSMUSG00000031749, ENSMUSG00000022365, ENSMUSG00000030987,…	5158	89	12504	1.4981	0.118589	0.00168166	0.247835
GOTERM_CC_FAT	GO:0005657~replication fork	20	0.220726	0.000173512	ENSMUSG00000004099, ENSMUSG00000041164, ENSMUSG00000032113, ENSMUSG00000028884, ENSMUSG00000000751, ENSMUSG00000019777, ENSMUSG00000009640, ENSMUSG00000027342, ENSMUSG00000030528, ENSMUSG00000006678, ENSMUSG00000028224, ENSMUSG00000049932, ENSMUSG00000043991, ENSMUSG00000026134, ENSMUSG00000043909, ENSMUSG00000059552, ENSMUSG00000025395, ENSMUSG00000024833, ENSMUSG00000029191, ENSMUSG00000029363	5158	24	12504	2.02016	0.126288	0.0017748	0.265037
GOTERM_CC_FAT	GO:0005788~endoplasmic reticulum lumen	46	0.50767	0.000214124	ENSMUSG00000019732, ENSMUSG00000024896, ENSMUSG00000034807, ENSMUSG00000048482, ENSMUSG00000016552, ENSMUSG00000029616, ENSMUSG00000040462, ENSMUSG00000029767, ENSMUSG00000022844, ENSMUSG00000037072, ENSMUSG00000025538, ENSMUSG00000028343, ENSMUSG00000003814, ENSMUSG00000025823, ENSMUSG00000028980, ENSMUSG00000026864, ENSMUSG00000037470, ENSMUSG00000028567, ENSMUSG00000039787, ENSMUSG00000034064,…	5158	72	12504	1.54879	0.153467	0.00216138	0.326976
GOTERM_CC_FAT	GO:0031300~intrinsic to organelle membrane	66	0.728396	0.000235284	ENSMUSG00000019428, ENSMUSG00000024425, ENSMUSG00000030545, ENSMUSG00000035505, ENSMUSG00000041523, ENSMUSG00000056812, ENSMUSG00000031545, ENSMUSG00000028207, ENSMUSG00000027198, ENSMUSG00000028538, ENSMUSG00000015653, ENSMUSG00000038383, ENSMUSG00000041220, ENSMUSG00000022885, ENSMUSG00000017721, ENSMUSG00000029020, ENSMUSG00000027828, ENSMUSG00000046378, ENSMUSG00000044857, ENSMUSG00000027963,…	5158	112	12504	1.42854	0.167292	0.00234433	0.359233
GOTERM_CC_FAT	GO:0001739~sex chromatin	18	0.198654	0.000239528	ENSMUSG00000030254, ENSMUSG00000060743, ENSMUSG00000020086, ENSMUSG00000016559, ENSMUSG00000049932, ENSMUSG00000020390, ENSMUSG00000040669, ENSMUSG00000024054, ENSMUSG00000018537, ENSMUSG00000024325, ENSMUSG00000031860, ENSMUSG00000017548, ENSMUSG00000040629, ENSMUSG00000032481, ENSMUSG00000032409, ENSMUSG00000031622, ENSMUSG00000000902, ENSMUSG00000030619, ENSMUSG00000032187	5158	21	12504	2.07788	0.170038	0.0023564	0.365703
GOTERM_CC_FAT	GO:0000794~condensed nuclear chromosome	30	0.331089	0.000245435	ENSMUSG00000041408, ENSMUSG00000005493, ENSMUSG00000025480, ENSMUSG00000035024, ENSMUSG00000032065, ENSMUSG00000003824, ENSMUSG00000026039, ENSMUSG00000032498, ENSMUSG00000029646, ENSMUSG00000042524, ENSMUSG00000045098, ENSMUSG00000035198, ENSMUSG00000027379, ENSMUSG00000000730, ENSMUSG00000000751, ENSMUSG00000027855, ENSMUSG00000059851, ENSMUSG00000036928, ENSMUSG00000023940, ENSMUSG00000025026,…	5158	42	12504	1.73157	0.173844	0.0023843	0.374706
GOTERM_CC_FAT	GO:0005773~vacuole	110	1.21399	0.000265492	ENSMUSG00000005949, ENSMUSG00000029175, ENSMUSG00000043940, ENSMUSG00000029516, ENSMUSG00000018774, ENSMUSG00000029434, ENSMUSG00000026944, ENSMUSG00000020261, ENSMUSG00000022500, ENSMUSG00000033379, ENSMUSG00000023830, ENSMUSG00000025512, ENSMUSG00000031447, ENSMUSG00000028581, ENSMUSG00000028062, ENSMUSG00000075415, ENSMUSG00000007458, ENSMUSG00000029426, ENSMUSG00000031591, ENSMUSG00000038371,…	5158	204	12504	1.30716	0.186639	0.00254712	0.405269
GOTERM_CC_FAT	GO:0000139~Golgi membrane	78	0.860832	0.000272116	ENSMUSG00000024425, ENSMUSG00000070425, ENSMUSG00000056812, ENSMUSG00000055629, ENSMUSG00000040722, ENSMUSG00000028700, ENSMUSG00000033272, ENSMUSG00000027198, ENSMUSG00000028538, ENSMUSG00000015653, ENSMUSG00000018672, ENSMUSG00000022885, ENSMUSG00000025484, ENSMUSG00000032482, ENSMUSG00000031749, ENSMUSG00000040584, ENSMUSG00000032640, ENSMUSG00000030059, ENSMUSG00000026925, ENSMUSG00000025789,…	5158	137	12504	1.3802	0.190821	0.00257881	0.415361
GOTERM_CC_FAT	GO:0044445~cytosolic part	41	0.452489	0.000293931	ENSMUSG00000024309, ENSMUSG00000052033, ENSMUSG00000028159, ENSMUSG00000047215, ENSMUSG00000030007, ENSMUSG00000061787, ENSMUSG00000004267, ENSMUSG00000033065, ENSMUSG00000046756, ENSMUSG00000028698, ENSMUSG00000043716, ENSMUSG00000022601, ENSMUSG00000032462, ENSMUSG00000007739, ENSMUSG00000034892, ENSMUSG00000027472, ENSMUSG00000029447, ENSMUSG00000027665, ENSMUSG00000048029, ENSMUSG00000003873,…	5158	63	12504	1.57765	0.204442	0.00275177	0.448589
GOTERM_CC_FAT	GO:0030027~lamellipodium	41	0.452489	0.000293931	ENSMUSG00000031442, ENSMUSG00000033278, ENSMUSG00000037032, ENSMUSG00000009073, ENSMUSG00000020476, ENSMUSG00000029359, ENSMUSG00000037815, ENSMUSG00000028868, ENSMUSG00000025265, ENSMUSG00000001729, ENSMUSG00000022957, ENSMUSG00000029528, ENSMUSG00000022995, ENSMUSG00000021262, ENSMUSG00000031642, ENSMUSG00000022788, ENSMUSG00000028745, ENSMUSG00000032491, ENSMUSG00000029684, ENSMUSG00000004056,…	5158	63	12504	1.57765	0.204442	0.00275177	0.448589
GOTERM_CC_FAT	GO:0005789~endoplasmic reticulum membrane	85	0.938086	0.000313899	ENSMUSG00000036078, ENSMUSG00000019428, ENSMUSG00000041523, ENSMUSG00000070425, ENSMUSG00000036833, ENSMUSG00000025240, ENSMUSG00000050229, ENSMUSG00000031545, ENSMUSG00000018042, ENSMUSG00000028343, ENSMUSG00000001467, ENSMUSG00000028207, ENSMUSG00000019877, ENSMUSG00000027198, ENSMUSG00000041220, ENSMUSG00000038383, ENSMUSG00000017721, ENSMUSG00000027828, ENSMUSG00000046378, ENSMUSG00000025198,…	5158	152	12504	1.35564	0.21671	0.00290354	0.478996
[truncated: 316 more rows]
