# Supplementary material for: PHF13 is a molecular reader and transcriptional co-regulator of H3K4me2/3
Source: eLife. 2016 May 25;5:e10607. doi: 10.7554/eLife.10607 (PMC4915813; doi:10.7554/eLife.10607)
Supplement: Figure 6—source data 4. — DOI: http://dx.doi.org/10.7554/eLife.10607.023 [file elife-10607-fig6-data4.xlsx]

## Sheet: sh3.genesDown.BP_FAT.txt
Category	Term	Count	%	PValue	Genes	List Total	Pop Hits	Pop Total	Fold Enrichment	Bonferroni	Benjamini	FDR
GOTERM_BP_FAT	GO:0006350~transcription	124	16.3158	6.71461e-11	ENSMUSG00000033837, ENSMUSG00000029178, ENSMUSG00000026398, ENSMUSG00000020074, ENSMUSG00000026739, ENSMUSG00000020889, ENSMUSG00000061517, ENSMUSG00000021514, ENSMUSG00000055148, ENSMUSG00000060261, ENSMUSG00000030319, ENSMUSG00000021264, ENSMUSG00000048047, ENSMUSG00000072945, ENSMUSG00000078502, ENSMUSG00000028640, ENSMUSG00000030067, ENSMUSG00000016503, ENSMUSG00000071359, ENSMUSG00000064194,…	534	1772	13588	1.78062	1.46781e-07	1.46781e-07	1.16644e-07
GOTERM_BP_FAT	GO:0045449~regulation of transcription	144	18.9474	3.2195e-10	ENSMUSG00000033837, ENSMUSG00000029178, ENSMUSG00000025925, ENSMUSG00000026398, ENSMUSG00000020074, ENSMUSG00000026739, ENSMUSG00000020889, ENSMUSG00000061517, ENSMUSG00000021514, ENSMUSG00000055148, ENSMUSG00000060261, ENSMUSG00000030319, ENSMUSG00000021264, ENSMUSG00000048047, ENSMUSG00000072945, ENSMUSG00000078502, ENSMUSG00000028640, ENSMUSG00000037169, ENSMUSG00000030067, ENSMUSG00000016503,…	534	2227	13588	1.64534	7.03782e-07	3.51891e-07	5.59282e-07
GOTERM_BP_FAT	GO:0051276~chromosome organization	35	4.60526	2.34403e-05	ENSMUSG00000056216, ENSMUSG00000040363, ENSMUSG00000025925, ENSMUSG00000057406, ENSMUSG00000035478, ENSMUSG00000000708, ENSMUSG00000026739, ENSMUSG00000028224, ENSMUSG00000027630, ENSMUSG00000024054, ENSMUSG00000031540, ENSMUSG00000056608, ENSMUSG00000005045, ENSMUSG00000022521, ENSMUSG00000057133, ENSMUSG00000029836, ENSMUSG00000037315, ENSMUSG00000020661, ENSMUSG00000015937, ENSMUSG00000007880,…	534	404	13588	2.20445	0.0499505	0.0169353	0.040712
GOTERM_BP_FAT	GO:0007010~cytoskeleton organization	30	3.94737	3.40124e-05	ENSMUSG00000015222, ENSMUSG00000069135, ENSMUSG00000021662, ENSMUSG00000023004, ENSMUSG00000025085, ENSMUSG00000028059, ENSMUSG00000025265, ENSMUSG00000023022, ENSMUSG00000079523, ENSMUSG00000022995, ENSMUSG00000052566, ENSMUSG00000041112, ENSMUSG00000019978, ENSMUSG00000078954, ENSMUSG00000057113, ENSMUSG00000030265, ENSMUSG00000023015, ENSMUSG00000038729, ENSMUSG00000022678, ENSMUSG00000026490,…	534	326	13588	2.34163	0.0716555	0.0184164	0.0590689
GOTERM_BP_FAT	GO:0006325~chromatin organization	29	3.81579	4.7189e-05	ENSMUSG00000056216, ENSMUSG00000040363, ENSMUSG00000057406, ENSMUSG00000000708, ENSMUSG00000035478, ENSMUSG00000026739, ENSMUSG00000027630, ENSMUSG00000031540, ENSMUSG00000056608, ENSMUSG00000022521, ENSMUSG00000005045, ENSMUSG00000057133, ENSMUSG00000029836, ENSMUSG00000037315, ENSMUSG00000020661, ENSMUSG00000015937, ENSMUSG00000007880, ENSMUSG00000020086, ENSMUSG00000027478, ENSMUSG00000053470,…	534	315	13588	2.34262	0.0980151	0.0204201	0.0819436
GOTERM_BP_FAT	GO:0016568~chromatin modification	24	3.15789	5.50729e-05	ENSMUSG00000020661, ENSMUSG00000056216, ENSMUSG00000040363, ENSMUSG00000015937, ENSMUSG00000057406, ENSMUSG00000020086, ENSMUSG00000035478, ENSMUSG00000000708, ENSMUSG00000026739, ENSMUSG00000027478, ENSMUSG00000027630, ENSMUSG00000041235, ENSMUSG00000053470, ENSMUSG00000023018, ENSMUSG00000031540, ENSMUSG00000056608, ENSMUSG00000031099, ENSMUSG00000022521, ENSMUSG00000029913, ENSMUSG00000041096,…	534	236	13588	2.5877	0.113428	0.0198655	0.0956279
GOTERM_BP_FAT	GO:0032535~regulation of cellular component size	19	2.5	6.1117e-05	ENSMUSG00000025958, ENSMUSG00000021061, ENSMUSG00000021754, ENSMUSG00000035107, ENSMUSG00000038793, ENSMUSG00000026950, ENSMUSG00000029014, ENSMUSG00000022055, ENSMUSG00000023022, ENSMUSG00000079523, ENSMUSG00000066652, ENSMUSG00000028657, ENSMUSG00000057738, ENSMUSG00000027433, ENSMUSG00000022099, ENSMUSG00000026532, ENSMUSG00000030168, ENSMUSG00000018442, ENSMUSG00000057113	534	161	13588	3.00291	0.125065	0.0189055	0.106118
GOTERM_BP_FAT	GO:0051493~regulation of cytoskeleton organization	14	1.84211	0.000126547	ENSMUSG00000015222, ENSMUSG00000021061, ENSMUSG00000032479, ENSMUSG00000021754, ENSMUSG00000028059, ENSMUSG00000026950, ENSMUSG00000079523, ENSMUSG00000023022, ENSMUSG00000057738, ENSMUSG00000025758, ENSMUSG00000020580, ENSMUSG00000022099, ENSMUSG00000026532, ENSMUSG00000057113	534	99	13588	3.59838	0.24168	0.0339901	0.219606
GOTERM_BP_FAT	GO:0048863~stem cell differentiation	8	1.05263	0.000158929	ENSMUSG00000055799, ENSMUSG00000031540, ENSMUSG00000022521, ENSMUSG00000041415, ENSMUSG00000069769, ENSMUSG00000074637, ENSMUSG00000041359, ENSMUSG00000036202	534	31	13588	6.56663	0.29351	0.0378694	0.275728
GOTERM_BP_FAT	GO:0048864~stem cell development	7	0.921053	0.000202019	ENSMUSG00000031540, ENSMUSG00000022521, ENSMUSG00000041415, ENSMUSG00000069769, ENSMUSG00000074637, ENSMUSG00000041359, ENSMUSG00000036202	534	23	13588	7.74434	0.35703	0.0432047	0.350361
GOTERM_BP_FAT	GO:0043244~regulation of protein complex disassembly	9	1.18421	0.000229178	ENSMUSG00000023022, ENSMUSG00000015222, ENSMUSG00000021061, ENSMUSG00000032479, ENSMUSG00000057738, ENSMUSG00000022099, ENSMUSG00000026532, ENSMUSG00000030122, ENSMUSG00000028059	534	43	13588	5.32584	0.3941	0.0445274	0.397375
GOTERM_BP_FAT	GO:0000278~mitotic cell cycle	23	3.02632	0.000245594	ENSMUSG00000027552, ENSMUSG00000030867, ENSMUSG00000032113, ENSMUSG00000061665, ENSMUSG00000025925, ENSMUSG00000070348, ENSMUSG00000024277, ENSMUSG00000022678, ENSMUSG00000074476, ENSMUSG00000028059, ENSMUSG00000038482, ENSMUSG00000033952, ENSMUSG00000029014, ENSMUSG00000056758, ENSMUSG00000034906, ENSMUSG00000040549, ENSMUSG00000029913, ENSMUSG00000019982, ENSMUSG00000001403, ENSMUSG00000022601,…	534	244	13588	2.39857	0.415463	0.0437583	0.425782
GOTERM_BP_FAT	GO:0043242~negative regulation of protein complex disassembly	8	1.05263	0.000354748	ENSMUSG00000023022, ENSMUSG00000015222, ENSMUSG00000021061, ENSMUSG00000032479, ENSMUSG00000057738, ENSMUSG00000022099, ENSMUSG00000026532, ENSMUSG00000028059	534	35	13588	5.81616	0.539581	0.0579179	0.614472
GOTERM_BP_FAT	GO:0051494~negative regulation of cytoskeleton organization	9	1.18421	0.000502135	ENSMUSG00000079523, ENSMUSG00000023022, ENSMUSG00000015222, ENSMUSG00000021061, ENSMUSG00000032479, ENSMUSG00000057738, ENSMUSG00000022099, ENSMUSG00000026532, ENSMUSG00000028059	534	48	13588	4.77107	0.666443	0.0754281	0.868718
GOTERM_BP_FAT	GO:0022403~cell cycle phase	27	3.55263	0.000532419	ENSMUSG00000027552, ENSMUSG00000061665, ENSMUSG00000032113, ENSMUSG00000025925, ENSMUSG00000070348, ENSMUSG00000015597, ENSMUSG00000074476, ENSMUSG00000028224, ENSMUSG00000038482, ENSMUSG00000028059, ENSMUSG00000033952, ENSMUSG00000056758, ENSMUSG00000031928, ENSMUSG00000001403, ENSMUSG00000022601, ENSMUSG00000024033, ENSMUSG00000062380, ENSMUSG00000030867, ENSMUSG00000024277, ENSMUSG00000022678,…	534	328	13588	2.09461	0.68782	0.0746764	0.920882
GOTERM_BP_FAT	GO:0007049~cell cycle	42	5.52632	0.000556764	ENSMUSG00000027552, ENSMUSG00000032113, ENSMUSG00000061665, ENSMUSG00000025925, ENSMUSG00000070348, ENSMUSG00000015597, ENSMUSG00000020074, ENSMUSG00000000708, ENSMUSG00000074476, ENSMUSG00000028224, ENSMUSG00000033952, ENSMUSG00000028059, ENSMUSG00000038482, ENSMUSG00000000486, ENSMUSG00000056758, ENSMUSG00000031928, ENSMUSG00000026753, ENSMUSG00000001403, ENSMUSG00000024033, ENSMUSG00000022601,…	534	611	13588	1.74913	0.704009	0.0732664	0.9628
GOTERM_BP_FAT	GO:0022402~cell cycle process	30	3.94737	0.000830138	ENSMUSG00000027552, ENSMUSG00000061665, ENSMUSG00000032113, ENSMUSG00000025925, ENSMUSG00000070348, ENSMUSG00000015597, ENSMUSG00000074476, ENSMUSG00000028224, ENSMUSG00000038482, ENSMUSG00000028059, ENSMUSG00000033952, ENSMUSG00000056758, ENSMUSG00000031928, ENSMUSG00000001403, ENSMUSG00000024033, ENSMUSG00000022601, ENSMUSG00000062380, ENSMUSG00000057113, ENSMUSG00000030867, ENSMUSG00000026667,…	534	393	13588	1.94242	0.837233	0.101286	1.43233
GOTERM_BP_FAT	GO:0051252~regulation of RNA metabolic process	82	10.7895	0.00133333	ENSMUSG00000033837, ENSMUSG00000027552, ENSMUSG00000030213, ENSMUSG00000040728, ENSMUSG00000026398, ENSMUSG00000025246, ENSMUSG00000035478, ENSMUSG00000000708, ENSMUSG00000026739, ENSMUSG00000020889, ENSMUSG00000029131, ENSMUSG00000078496, ENSMUSG00000061517, ENSMUSG00000021514, ENSMUSG00000056758, ENSMUSG00000030788, ENSMUSG00000058186, ENSMUSG00000021264, ENSMUSG00000072945, ENSMUSG00000078502,…	534	1488	13588	1.40225	0.945883	0.149588	2.29112
GOTERM_BP_FAT	GO:0019827~stem cell maintenance	6	0.789474	0.00137796	ENSMUSG00000031540, ENSMUSG00000022521, ENSMUSG00000041415, ENSMUSG00000074637, ENSMUSG00000041359, ENSMUSG00000036202	534	22	13588	6.93973	0.95092	0.146703	2.36695
GOTERM_BP_FAT	GO:0051253~negative regulation of RNA metabolic process	24	3.15789	0.00258756	ENSMUSG00000033837, ENSMUSG00000020661, ENSMUSG00000030213, ENSMUSG00000040363, ENSMUSG00000068284, ENSMUSG00000027547, ENSMUSG00000025246, ENSMUSG00000035478, ENSMUSG00000026739, ENSMUSG00000027478, ENSMUSG00000074637, ENSMUSG00000027499, ENSMUSG00000029131, ENSMUSG00000027630, ENSMUSG00000055799, ENSMUSG00000072945, ENSMUSG00000020644, ENSMUSG00000029836, ENSMUSG00000036940, ENSMUSG00000022553,…	534	310	13588	1.96999	0.99653	0.246621	4.40108
GOTERM_BP_FAT	GO:0010639~negative regulation of organelle organization	9	1.18421	0.00278618	ENSMUSG00000079523, ENSMUSG00000023022, ENSMUSG00000015222, ENSMUSG00000021061, ENSMUSG00000032479, ENSMUSG00000057738, ENSMUSG00000022099, ENSMUSG00000026532, ENSMUSG00000028059	534	62	13588	3.69373	0.997755	0.25206	4.73124
GOTERM_BP_FAT	GO:0033043~regulation of organelle organization	15	1.97368	0.00295492	ENSMUSG00000015222, ENSMUSG00000021061, ENSMUSG00000032479, ENSMUSG00000021754, ENSMUSG00000028059, ENSMUSG00000026950, ENSMUSG00000023022, ENSMUSG00000079523, ENSMUSG00000057738, ENSMUSG00000025758, ENSMUSG00000020580, ENSMUSG00000022099, ENSMUSG00000026532, ENSMUSG00000027306, ENSMUSG00000057113	534	154	13588	2.47848	0.998449	0.254758	5.01089
GOTERM_BP_FAT	GO:0006355~regulation of transcription, DNA-dependent	79	10.3947	0.00303019	ENSMUSG00000033837, ENSMUSG00000027552, ENSMUSG00000030213, ENSMUSG00000026398, ENSMUSG00000025246, ENSMUSG00000035478, ENSMUSG00000000708, ENSMUSG00000026739, ENSMUSG00000020889, ENSMUSG00000029131, ENSMUSG00000078496, ENSMUSG00000061517, ENSMUSG00000021514, ENSMUSG00000056758, ENSMUSG00000030788, ENSMUSG00000058186, ENSMUSG00000021264, ENSMUSG00000072945, ENSMUSG00000078502, ENSMUSG00000028640,…	534	1465	13588	1.37216	0.998685	0.250566	5.13539
GOTERM_BP_FAT	GO:0030832~regulation of actin filament length	8	1.05263	0.00355741	ENSMUSG00000079523, ENSMUSG00000023022, ENSMUSG00000021061, ENSMUSG00000021754, ENSMUSG00000057738, ENSMUSG00000022099, ENSMUSG00000026532, ENSMUSG00000026950	534	51	13588	3.99148	0.999586	0.277182	6.00311
GOTERM_BP_FAT	GO:0051301~cell division	22	2.89474	0.00357377	ENSMUSG00000030867, ENSMUSG00000061665, ENSMUSG00000025925, ENSMUSG00000070348, ENSMUSG00000046323, ENSMUSG00000023015, ENSMUSG00000024277, ENSMUSG00000026739, ENSMUSG00000022678, ENSMUSG00000074476, ENSMUSG00000000486, ENSMUSG00000028059, ENSMUSG00000033952, ENSMUSG00000056758, ENSMUSG00000070544, ENSMUSG00000034906, ENSMUSG00000040549, ENSMUSG00000020580, ENSMUSG00000001403, ENSMUSG00000027306,…	534	281	13588	1.99219	0.999601	0.268787	6.02992
GOTERM_BP_FAT	GO:0009798~axis specification	6	0.789474	0.00359393	ENSMUSG00000055799, ENSMUSG00000025223, ENSMUSG00000072945, ENSMUSG00000073678, ENSMUSG00000027168, ENSMUSG00000038793	534	27	13588	5.6546	0.999618	0.261187	6.06294
GOTERM_BP_FAT	GO:0006333~chromatin assembly or disassembly	12	1.57895	0.0036363	ENSMUSG00000041235, ENSMUSG00000056216, ENSMUSG00000015937, ENSMUSG00000031540, ENSMUSG00000056608, ENSMUSG00000060081, ENSMUSG00000005045, ENSMUSG00000020086, ENSMUSG00000041096, ENSMUSG00000057133, ENSMUSG00000029836, ENSMUSG00000059288	534	109	13588	2.80136	0.999652	0.255425	6.13231
GOTERM_BP_FAT	GO:0009948~anterior/posterior axis specification	5	0.657895	0.00370593	ENSMUSG00000055799, ENSMUSG00000025223, ENSMUSG00000072945, ENSMUSG00000073678, ENSMUSG00000038793	534	17	13588	7.48403	0.999701	0.251635	6.2462
GOTERM_BP_FAT	GO:0000226~microtubule cytoskeleton organization	12	1.57895	0.0041822	ENSMUSG00000022055, ENSMUSG00000015222, ENSMUSG00000052566, ENSMUSG00000040549, ENSMUSG00000069135, ENSMUSG00000023004, ENSMUSG00000022678, ENSMUSG00000027306, ENSMUSG00000026490, ENSMUSG00000024974, ENSMUSG00000024068, ENSMUSG00000057113	534	111	13588	2.75089	0.999895	0.270876	7.02172
GOTERM_BP_FAT	GO:0022904~respiratory electron transport chain	6	0.789474	0.00423651	ENSMUSG00000027010, ENSMUSG00000064367, ENSMUSG00000030647, ENSMUSG00000064370, ENSMUSG00000064363, ENSMUSG00000064354	534	28	13588	5.45265	0.999907	0.26608	7.10977
GOTERM_BP_FAT	GO:0016569~covalent chromatin modification	11	1.44737	0.00434318	ENSMUSG00000020661, ENSMUSG00000031540, ENSMUSG00000022521, ENSMUSG00000029913, ENSMUSG00000035478, ENSMUSG00000000708, ENSMUSG00000027478, ENSMUSG00000026739, ENSMUSG00000036940, ENSMUSG00000025932, ENSMUSG00000037315	534	96	13588	2.91565	0.999926	0.264299	7.28249
GOTERM_BP_FAT	GO:0043009~chordate embryonic development	29	3.81579	0.00452233	ENSMUSG00000041703, ENSMUSG00000035478, ENSMUSG00000026739, ENSMUSG00000032346, ENSMUSG00000031548, ENSMUSG00000029131, ENSMUSG00000028224, ENSMUSG00000004364, ENSMUSG00000021660, ENSMUSG00000022995, ENSMUSG00000014773, ENSMUSG00000032366, ENSMUSG00000025758, ENSMUSG00000072945, ENSMUSG00000048402, ENSMUSG00000000142, ENSMUSG00000027547, ENSMUSG00000022587, ENSMUSG00000038151, ENSMUSG00000000303,…	534	421	13588	1.75279	0.99995	0.266284	7.57187
GOTERM_BP_FAT	GO:0045892~negative regulation of transcription, DNA-dependent	23	3.02632	0.00496953	ENSMUSG00000033837, ENSMUSG00000020661, ENSMUSG00000030213, ENSMUSG00000040363, ENSMUSG00000068284, ENSMUSG00000027547, ENSMUSG00000025246, ENSMUSG00000035478, ENSMUSG00000026739, ENSMUSG00000027478, ENSMUSG00000074637, ENSMUSG00000027499, ENSMUSG00000029131, ENSMUSG00000027630, ENSMUSG00000055799, ENSMUSG00000072945, ENSMUSG00000020644, ENSMUSG00000029836, ENSMUSG00000036940, ENSMUSG00000022553,…	534	308	13588	1.90017	0.999981	0.281087	8.29052
GOTERM_BP_FAT	GO:0009792~embryonic development ending in birth or egg hatching	29	3.81579	0.0051513	ENSMUSG00000041703, ENSMUSG00000035478, ENSMUSG00000026739, ENSMUSG00000032346, ENSMUSG00000031548, ENSMUSG00000029131, ENSMUSG00000028224, ENSMUSG00000004364, ENSMUSG00000021660, ENSMUSG00000022995, ENSMUSG00000014773, ENSMUSG00000032366, ENSMUSG00000025758, ENSMUSG00000072945, ENSMUSG00000048402, ENSMUSG00000000142, ENSMUSG00000027547, ENSMUSG00000022587, ENSMUSG00000038151, ENSMUSG00000000303,…	534	425	13588	1.73629	0.999988	0.282552	8.58112
GOTERM_BP_FAT	GO:0043933~macromolecular complex subunit organization	26	3.42105	0.0052556	ENSMUSG00000056216, ENSMUSG00000039361, ENSMUSG00000023004, ENSMUSG00000002985, ENSMUSG00000032346, ENSMUSG00000022995, ENSMUSG00000028134, ENSMUSG00000031540, ENSMUSG00000024030, ENSMUSG00000027433, ENSMUSG00000020962, ENSMUSG00000022601, ENSMUSG00000062380, ENSMUSG00000057113, ENSMUSG00000071359, ENSMUSG00000020409, ENSMUSG00000015937, ENSMUSG00000041415, ENSMUSG00000020086, ENSMUSG00000000303,…	534	367	13588	1.80269	0.99999	0.28044	8.74747
GOTERM_BP_FAT	GO:0045596~negative regulation of cell differentiation	16	2.10526	0.00539115	ENSMUSG00000025223, ENSMUSG00000070348, ENSMUSG00000000142, ENSMUSG00000041415, ENSMUSG00000074637, ENSMUSG00000033952, ENSMUSG00000014773, ENSMUSG00000047139, ENSMUSG00000031540, ENSMUSG00000024030, ENSMUSG00000022521, ENSMUSG00000041359, ENSMUSG00000036202, ENSMUSG00000027276, ENSMUSG00000027168, ENSMUSG00000048402	534	182	13588	2.23698	0.999993	0.279816	8.96324
GOTERM_BP_FAT	GO:0043161~proteasomal ubiquitin-dependent protein catabolic process	6	0.789474	0.0057602	ENSMUSG00000061665, ENSMUSG00000025246, ENSMUSG00000017843, ENSMUSG00000018442, ENSMUSG00000004364, ENSMUSG00000027630	534	30	13588	5.08914	0.999997	0.289156	9.54827
GOTERM_BP_FAT	GO:0010498~proteasomal protein catabolic process	6	0.789474	0.0057602	ENSMUSG00000061665, ENSMUSG00000025246, ENSMUSG00000017843, ENSMUSG00000018442, ENSMUSG00000004364, ENSMUSG00000027630	534	30	13588	5.08914	0.999997	0.289156	9.54827
GOTERM_BP_FAT	GO:0040029~regulation of gene expression, epigenetic	9	1.18421	0.00592574	ENSMUSG00000024054, ENSMUSG00000020661, ENSMUSG00000030213, ENSMUSG00000015937, ENSMUSG00000041415, ENSMUSG00000020086, ENSMUSG00000035478, ENSMUSG00000026723, ENSMUSG00000027478	534	70	13588	3.27159	0.999998	0.289581	9.80953
GOTERM_BP_FAT	GO:0016481~negative regulation of transcription	26	3.42105	0.00622012	ENSMUSG00000033837, ENSMUSG00000030213, ENSMUSG00000040363, ENSMUSG00000037608, ENSMUSG00000025246, ENSMUSG00000035478, ENSMUSG00000026739, ENSMUSG00000074637, ENSMUSG00000029131, ENSMUSG00000027630, ENSMUSG00000031540, ENSMUSG00000072945, ENSMUSG00000029836, ENSMUSG00000048402, ENSMUSG00000030067, ENSMUSG00000020653, ENSMUSG00000020661, ENSMUSG00000068284, ENSMUSG00000027547, ENSMUSG00000027478,…	534	372	13588	1.77846	0.999999	0.295125	10.2724
GOTERM_BP_FAT	GO:0035023~regulation of Rho protein signal transduction	10	1.31579	0.00646543	ENSMUSG00000031442, ENSMUSG00000039713, ENSMUSG00000017631, ENSMUSG00000022788, ENSMUSG00000020640, ENSMUSG00000021662, ENSMUSG00000021895, ENSMUSG00000028059, ENSMUSG00000031139, ENSMUSG00000025265	534	86	13588	2.9588	0.999999	0.298464	10.6564
GOTERM_BP_FAT	GO:0045664~regulation of neuron differentiation	11	1.44737	0.00666345	ENSMUSG00000022055, ENSMUSG00000047139, ENSMUSG00000014773, ENSMUSG00000021451, ENSMUSG00000020027, ENSMUSG00000074637, ENSMUSG00000025932, ENSMUSG00000033952, ENSMUSG00000066129, ENSMUSG00000027168, ENSMUSG00000048402	534	102	13588	2.74414	1	0.299853	10.9652
GOTERM_BP_FAT	GO:0009952~anterior/posterior pattern formation	14	1.84211	0.0072152	ENSMUSG00000033837, ENSMUSG00000025223, ENSMUSG00000000142, ENSMUSG00000073678, ENSMUSG00000026739, ENSMUSG00000031548, ENSMUSG00000038793, ENSMUSG00000055799, ENSMUSG00000025491, ENSMUSG00000014773, ENSMUSG00000021264, ENSMUSG00000072945, ENSMUSG00000021848, ENSMUSG00000027168	534	153	13588	2.32836	1	0.314012	11.8204
GOTERM_BP_FAT	GO:0045934~negative regulation of nucleobase, nucleoside, nucleotide and nucleic acid metabolic process	27	3.55263	0.00737208	ENSMUSG00000033837, ENSMUSG00000030213, ENSMUSG00000040363, ENSMUSG00000037608, ENSMUSG00000025246, ENSMUSG00000035478, ENSMUSG00000026739, ENSMUSG00000074637, ENSMUSG00000029131, ENSMUSG00000027630, ENSMUSG00000031540, ENSMUSG00000072945, ENSMUSG00000029836, ENSMUSG00000048402, ENSMUSG00000030067, ENSMUSG00000020653, ENSMUSG00000057113, ENSMUSG00000020661, ENSMUSG00000068284, ENSMUSG00000027547,…	534	397	13588	1.73056	1	0.31351	12.0622
GOTERM_BP_FAT	GO:0000279~M phase	21	2.76316	0.0080626	ENSMUSG00000030867, ENSMUSG00000061665, ENSMUSG00000025925, ENSMUSG00000024277, ENSMUSG00000015597, ENSMUSG00000022678, ENSMUSG00000074476, ENSMUSG00000028224, ENSMUSG00000028059, ENSMUSG00000033952, ENSMUSG00000056758, ENSMUSG00000031928, ENSMUSG00000034906, ENSMUSG00000040549, ENSMUSG00000031004, ENSMUSG00000001403, ENSMUSG00000024033, ENSMUSG00000022601, ENSMUSG00000027306, ENSMUSG00000062380,…	534	283	13588	1.8882	1	0.331145	13.1188
GOTERM_BP_FAT	GO:0030835~negative regulation of actin filament depolymerization	5	0.657895	0.00823175	ENSMUSG00000023022, ENSMUSG00000021061, ENSMUSG00000057738, ENSMUSG00000022099, ENSMUSG00000026532	534	21	13588	6.0585	1	0.330708	13.3758
GOTERM_BP_FAT	GO:0015931~nucleobase, nucleoside, nucleotide and nucleic acid transport	9	1.18421	0.00826082	ENSMUSG00000062078, ENSMUSG00000030091, ENSMUSG00000000838, ENSMUSG00000022855, ENSMUSG00000040549, ENSMUSG00000031633, ENSMUSG00000029405, ENSMUSG00000046434, ENSMUSG00000057113	534	74	13588	3.09475	1	0.32578	13.4199
GOTERM_BP_FAT	GO:0051172~negative regulation of nitrogen compound metabolic process	27	3.55263	0.00837824	ENSMUSG00000033837, ENSMUSG00000030213, ENSMUSG00000040363, ENSMUSG00000037608, ENSMUSG00000025246, ENSMUSG00000035478, ENSMUSG00000026739, ENSMUSG00000074637, ENSMUSG00000029131, ENSMUSG00000027630, ENSMUSG00000031540, ENSMUSG00000072945, ENSMUSG00000029836, ENSMUSG00000048402, ENSMUSG00000030067, ENSMUSG00000020653, ENSMUSG00000057113, ENSMUSG00000020661, ENSMUSG00000068284, ENSMUSG00000027547,…	534	401	13588	1.7133	1	0.323835	13.5978
GOTERM_BP_FAT	GO:0051056~regulation of small GTPase mediated signal transduction	18	2.36842	0.00845502	ENSMUSG00000032946, ENSMUSG00000031442, ENSMUSG00000039713, ENSMUSG00000027347, ENSMUSG00000031709, ENSMUSG00000017631, ENSMUSG00000030265, ENSMUSG00000020640, ENSMUSG00000021662, ENSMUSG00000028059, ENSMUSG00000066129, ENSMUSG00000025265, ENSMUSG00000022788, ENSMUSG00000020130, ENSMUSG00000026721, ENSMUSG00000021895, ENSMUSG00000031139, ENSMUSG00000049044	534	228	13588	2.00887	1	0.3207	13.714
GOTERM_BP_FAT	GO:0032956~regulation of actin cytoskeleton organization	8	1.05263	0.00877846	ENSMUSG00000079523, ENSMUSG00000023022, ENSMUSG00000021061, ENSMUSG00000021754, ENSMUSG00000057738, ENSMUSG00000022099, ENSMUSG00000026532, ENSMUSG00000026950	534	60	13588	3.39276	1	0.325211	14.2016
GOTERM_BP_FAT	GO:0030029~actin filament-based process	15	1.97368	0.00951005	ENSMUSG00000030265, ENSMUSG00000023015, ENSMUSG00000038729, ENSMUSG00000028059, ENSMUSG00000026950, ENSMUSG00000079523, ENSMUSG00000023022, ENSMUSG00000022995, ENSMUSG00000041112, ENSMUSG00000019978, ENSMUSG00000033985, ENSMUSG00000020580, ENSMUSG00000068699, ENSMUSG00000022353, ENSMUSG00000078954	534	176	13588	2.16867	1	0.341486	15.2951
GOTERM_BP_FAT	GO:0000087~M phase of mitotic cell cycle	16	2.10526	0.00952945	ENSMUSG00000030867, ENSMUSG00000061665, ENSMUSG00000025925, ENSMUSG00000024277, ENSMUSG00000022678, ENSMUSG00000074476, ENSMUSG00000028059, ENSMUSG00000033952, ENSMUSG00000056758, ENSMUSG00000034906, ENSMUSG00000040549, ENSMUSG00000001403, ENSMUSG00000022601, ENSMUSG00000027306, ENSMUSG00000062380, ENSMUSG00000024974	534	194	13588	2.09861	1	0.336626	15.3239
GOTERM_BP_FAT	GO:0032970~regulation of actin filament-based process	8	1.05263	0.00959092	ENSMUSG00000079523, ENSMUSG00000023022, ENSMUSG00000021061, ENSMUSG00000021754, ENSMUSG00000057738, ENSMUSG00000022099, ENSMUSG00000026532, ENSMUSG00000026950	534	61	13588	3.33714	1	0.333112	15.4151
GOTERM_BP_FAT	GO:0003002~regionalization	17	2.23684	0.0101753	ENSMUSG00000033837, ENSMUSG00000025223, ENSMUSG00000000142, ENSMUSG00000073678, ENSMUSG00000026739, ENSMUSG00000031548, ENSMUSG00000038793, ENSMUSG00000055799, ENSMUSG00000025491, ENSMUSG00000014773, ENSMUSG00000021466, ENSMUSG00000021264, ENSMUSG00000072945, ENSMUSG00000021848, ENSMUSG00000022911, ENSMUSG00000027168, ENSMUSG00000048402	534	214	13588	2.02139	1	0.344155	16.2779
GOTERM_BP_FAT	GO:0051129~negative regulation of cellular component organization	10	1.31579	0.0106428	ENSMUSG00000079523, ENSMUSG00000023022, ENSMUSG00000015222, ENSMUSG00000021061, ENSMUSG00000032479, ENSMUSG00000057738, ENSMUSG00000022099, ENSMUSG00000026532, ENSMUSG00000028059, ENSMUSG00000013663	534	93	13588	2.7361	1	0.351533	16.9622
GOTERM_BP_FAT	GO:0010629~negative regulation of gene expression	27	3.55263	0.0109178	ENSMUSG00000033837, ENSMUSG00000030213, ENSMUSG00000040363, ENSMUSG00000037608, ENSMUSG00000025246, ENSMUSG00000035478, ENSMUSG00000026739, ENSMUSG00000074637, ENSMUSG00000029131, ENSMUSG00000027630, ENSMUSG00000031540, ENSMUSG00000072945, ENSMUSG00000029836, ENSMUSG00000048402, ENSMUSG00000030067, ENSMUSG00000020653, ENSMUSG00000020661, ENSMUSG00000068284, ENSMUSG00000027547, ENSMUSG00000041415,…	534	410	13588	1.67569	1	0.353588	17.3622
GOTERM_BP_FAT	GO:0009880~embryonic pattern specification	6	0.789474	0.0111795	ENSMUSG00000055799, ENSMUSG00000014773, ENSMUSG00000072945, ENSMUSG00000073678, ENSMUSG00000032346, ENSMUSG00000048402	534	35	13588	4.36212	1	0.355227	17.7413
GOTERM_BP_FAT	GO:0016573~histone acetylation	6	0.789474	0.0111795	ENSMUSG00000031540, ENSMUSG00000022521, ENSMUSG00000035478, ENSMUSG00000000708, ENSMUSG00000026739, ENSMUSG00000037315	534	35	13588	4.36212	1	0.355227	17.7413
GOTERM_BP_FAT	GO:0009891~positive regulation of biosynthetic process	34	4.47368	0.0120791	ENSMUSG00000033837, ENSMUSG00000030213, ENSMUSG00000056216, ENSMUSG00000043962, ENSMUSG00000036098, ENSMUSG00000026398, ENSMUSG00000000708, ENSMUSG00000060206, ENSMUSG00000074637, ENSMUSG00000025085, ENSMUSG00000038482, ENSMUSG00000020248, ENSMUSG00000055148, ENSMUSG00000031540, ENSMUSG00000022521, ENSMUSG00000024030, ENSMUSG00000031805, ENSMUSG00000021848, ENSMUSG00000031601, ENSMUSG00000066551,…	534	557	13588	1.55324	1	0.372532	19.0316
GOTERM_BP_FAT	GO:0070507~regulation of microtubule cytoskeleton organization	6	0.789474	0.0125746	ENSMUSG00000015222, ENSMUSG00000032479, ENSMUSG00000025758, ENSMUSG00000020580, ENSMUSG00000028059, ENSMUSG00000057113	534	36	13588	4.24095	1	0.379319	19.7343
GOTERM_BP_FAT	GO:0006473~protein amino acid acetylation	6	0.789474	0.0125746	ENSMUSG00000031540, ENSMUSG00000022521, ENSMUSG00000035478, ENSMUSG00000000708, ENSMUSG00000026739, ENSMUSG00000037315	534	36	13588	4.24095	1	0.379319	19.7343
GOTERM_BP_FAT	GO:0008064~regulation of actin polymerization or depolymerization	7	0.921053	0.0130219	ENSMUSG00000079523, ENSMUSG00000023022, ENSMUSG00000021061, ENSMUSG00000021754, ENSMUSG00000057738, ENSMUSG00000022099, ENSMUSG00000026532	534	50	13588	3.5624	1	0.384698	20.3636
GOTERM_BP_FAT	GO:0030036~actin cytoskeleton organization	14	1.84211	0.0131378	ENSMUSG00000030265, ENSMUSG00000023015, ENSMUSG00000038729, ENSMUSG00000028059, ENSMUSG00000026950, ENSMUSG00000079523, ENSMUSG00000023022, ENSMUSG00000022995, ENSMUSG00000041112, ENSMUSG00000019978, ENSMUSG00000033985, ENSMUSG00000020580, ENSMUSG00000022353, ENSMUSG00000078954	534	165	13588	2.15903	1	0.382345	20.5258
GOTERM_BP_FAT	GO:0030834~regulation of actin filament depolymerization	5	0.657895	0.0133226	ENSMUSG00000023022, ENSMUSG00000021061, ENSMUSG00000057738, ENSMUSG00000022099, ENSMUSG00000026532	534	24	13588	5.30119	1	0.381611	20.784
GOTERM_BP_FAT	GO:0043254~regulation of protein complex assembly	8	1.05263	0.0133957	ENSMUSG00000079523, ENSMUSG00000030213, ENSMUSG00000021061, ENSMUSG00000047139, ENSMUSG00000021754, ENSMUSG00000057738, ENSMUSG00000022099, ENSMUSG00000026532	534	65	13588	3.13178	1	0.378425	20.8859
GOTERM_BP_FAT	GO:0009265~2'-deoxyribonucleotide biosynthetic process	3	0.394737	0.0141931	ENSMUSG00000071359, ENSMUSG00000025747, ENSMUSG00000039197	534	5	13588	15.2674	1	0.391042	21.9893
GOTERM_BP_FAT	GO:0006346~methylation-dependent chromatin silencing	3	0.394737	0.0141931	ENSMUSG00000020661, ENSMUSG00000035478, ENSMUSG00000027478	534	5	13588	15.2674	1	0.391042	21.9893
GOTERM_BP_FAT	GO:0050658~RNA transport	8	1.05263	0.014495	ENSMUSG00000062078, ENSMUSG00000030091, ENSMUSG00000000838, ENSMUSG00000022855, ENSMUSG00000040549, ENSMUSG00000029405, ENSMUSG00000046434, ENSMUSG00000057113	534	66	13588	3.08433	1	0.392692	22.4033
GOTERM_BP_FAT	GO:0051236~establishment of RNA localization	8	1.05263	0.014495	ENSMUSG00000062078, ENSMUSG00000030091, ENSMUSG00000000838, ENSMUSG00000022855, ENSMUSG00000040549, ENSMUSG00000029405, ENSMUSG00000046434, ENSMUSG00000057113	534	66	13588	3.08433	1	0.392692	22.4033
GOTERM_BP_FAT	GO:0050657~nucleic acid transport	8	1.05263	0.014495	ENSMUSG00000062078, ENSMUSG00000030091, ENSMUSG00000000838, ENSMUSG00000022855, ENSMUSG00000040549, ENSMUSG00000029405, ENSMUSG00000046434, ENSMUSG00000057113	534	66	13588	3.08433	1	0.392692	22.4033
GOTERM_BP_FAT	GO:0030837~negative regulation of actin filament polymerization	5	0.657895	0.0153797	ENSMUSG00000079523, ENSMUSG00000021061, ENSMUSG00000057738, ENSMUSG00000022099, ENSMUSG00000026532	534	25	13588	5.08914	1	0.406221	23.6045
GOTERM_BP_FAT	GO:0051173~positive regulation of nitrogen compound metabolic process	32	4.21053	0.0153999	ENSMUSG00000033837, ENSMUSG00000030213, ENSMUSG00000056216, ENSMUSG00000043962, ENSMUSG00000036098, ENSMUSG00000026398, ENSMUSG00000000708, ENSMUSG00000060206, ENSMUSG00000074637, ENSMUSG00000025085, ENSMUSG00000038482, ENSMUSG00000020248, ENSMUSG00000055148, ENSMUSG00000031540, ENSMUSG00000022521, ENSMUSG00000031805, ENSMUSG00000021848, ENSMUSG00000031601, ENSMUSG00000066551, ENSMUSG00000048402,…	534	526	13588	1.54803	1	0.40192	23.6318
GOTERM_BP_FAT	GO:0006403~RNA localization	8	1.05263	0.0156572	ENSMUSG00000062078, ENSMUSG00000030091, ENSMUSG00000000838, ENSMUSG00000022855, ENSMUSG00000040549, ENSMUSG00000029405, ENSMUSG00000046434, ENSMUSG00000057113	534	67	13588	3.03829	1	0.402432	23.9778
GOTERM_BP_FAT	GO:0010628~positive regulation of gene expression	30	3.94737	0.0170471	ENSMUSG00000033837, ENSMUSG00000030213, ENSMUSG00000043962, ENSMUSG00000036098, ENSMUSG00000026398, ENSMUSG00000000708, ENSMUSG00000060206, ENSMUSG00000074637, ENSMUSG00000025085, ENSMUSG00000038482, ENSMUSG00000020248, ENSMUSG00000055148, ENSMUSG00000031540, ENSMUSG00000022521, ENSMUSG00000031805, ENSMUSG00000021848, ENSMUSG00000031601, ENSMUSG00000066551, ENSMUSG00000048402, ENSMUSG00000025958,…	534	488	13588	1.56428	1	0.424627	25.821
GOTERM_BP_FAT	GO:0045935~positive regulation of nucleobase, nucleoside, nucleotide and nucleic acid metabolic process	31	4.07895	0.0176294	ENSMUSG00000033837, ENSMUSG00000030213, ENSMUSG00000056216, ENSMUSG00000043962, ENSMUSG00000036098, ENSMUSG00000026398, ENSMUSG00000000708, ENSMUSG00000060206, ENSMUSG00000074637, ENSMUSG00000025085, ENSMUSG00000038482, ENSMUSG00000020248, ENSMUSG00000055148, ENSMUSG00000031540, ENSMUSG00000022521, ENSMUSG00000031805, ENSMUSG00000021848, ENSMUSG00000031601, ENSMUSG00000066551, ENSMUSG00000048402,…	534	510	13588	1.5467	1	0.430788	26.5808
GOTERM_BP_FAT	GO:0000280~nuclear division	15	1.97368	0.0176553	ENSMUSG00000030867, ENSMUSG00000061665, ENSMUSG00000025925, ENSMUSG00000024277, ENSMUSG00000022678, ENSMUSG00000074476, ENSMUSG00000028059, ENSMUSG00000033952, ENSMUSG00000056758, ENSMUSG00000034906, ENSMUSG00000040549, ENSMUSG00000001403, ENSMUSG00000027306, ENSMUSG00000062380, ENSMUSG00000024974	534	190	13588	2.00887	1	0.426659	26.6144
GOTERM_BP_FAT	GO:0007067~mitosis	15	1.97368	0.0176553	ENSMUSG00000030867, ENSMUSG00000061665, ENSMUSG00000025925, ENSMUSG00000024277, ENSMUSG00000022678, ENSMUSG00000074476, ENSMUSG00000028059, ENSMUSG00000033952, ENSMUSG00000056758, ENSMUSG00000034906, ENSMUSG00000040549, ENSMUSG00000001403, ENSMUSG00000027306, ENSMUSG00000062380, ENSMUSG00000024974	534	190	13588	2.00887	1	0.426659	26.6144
GOTERM_BP_FAT	GO:0031328~positive regulation of cellular biosynthetic process	33	4.34211	0.0177058	ENSMUSG00000033837, ENSMUSG00000030213, ENSMUSG00000056216, ENSMUSG00000043962, ENSMUSG00000036098, ENSMUSG00000026398, ENSMUSG00000000708, ENSMUSG00000060206, ENSMUSG00000074637, ENSMUSG00000025085, ENSMUSG00000038482, ENSMUSG00000020248, ENSMUSG00000055148, ENSMUSG00000031540, ENSMUSG00000022521, ENSMUSG00000031805, ENSMUSG00000021848, ENSMUSG00000031601, ENSMUSG00000066551, ENSMUSG00000048402,…	534	552	13588	1.52121	1	0.423063	26.6799
GOTERM_BP_FAT	GO:0001701~in utero embryonic development	19	2.5	0.0179351	ENSMUSG00000027547, ENSMUSG00000035478, ENSMUSG00000026739, ENSMUSG00000032346, ENSMUSG00000022587, ENSMUSG00000029131, ENSMUSG00000028224, ENSMUSG00000004364, ENSMUSG00000021660, ENSMUSG00000038151, ENSMUSG00000000303, ENSMUSG00000041235, ENSMUSG00000014773, ENSMUSG00000032366, ENSMUSG00000025758, ENSMUSG00000019982, ENSMUSG00000073988, ENSMUSG00000036940, ENSMUSG00000048402	534	267	13588	1.81074	1	0.422746	26.9767
GOTERM_BP_FAT	GO:0035282~segmentation	7	0.921053	0.0185755	ENSMUSG00000055799, ENSMUSG00000025491, ENSMUSG00000014773, ENSMUSG00000000142, ENSMUSG00000072945, ENSMUSG00000031548, ENSMUSG00000048402	534	54	13588	3.29852	1	0.429635	27.7995
GOTERM_BP_FAT	GO:0022613~ribonucleoprotein complex biogenesis	12	1.57895	0.0189646	ENSMUSG00000020409, ENSMUSG00000060739, ENSMUSG00000028134, ENSMUSG00000022191, ENSMUSG00000030216, ENSMUSG00000021243, ENSMUSG00000041415, ENSMUSG00000022601, ENSMUSG00000032288, ENSMUSG00000063785, ENSMUSG00000025266, ENSMUSG00000057113	534	137	13588	2.22882	1	0.431984	28.2951
GOTERM_BP_FAT	GO:0001676~long-chain fatty acid metabolic process	4	0.526316	0.0192014	ENSMUSG00000022040, ENSMUSG00000062078, ENSMUSG00000027359, ENSMUSG00000072949	534	15	13588	6.78552	1	0.431697	28.5952
GOTERM_BP_FAT	GO:0031333~negative regulation of protein complex assembly	5	0.657895	0.0200664	ENSMUSG00000079523, ENSMUSG00000021061, ENSMUSG00000057738, ENSMUSG00000022099, ENSMUSG00000026532	534	27	13588	4.71217	1	0.441803	29.6814
GOTERM_BP_FAT	GO:0006220~pyrimidine nucleotide metabolic process	5	0.657895	0.0200664	ENSMUSG00000071359, ENSMUSG00000027203, ENSMUSG00000025747, ENSMUSG00000060090, ENSMUSG00000020407	534	27	13588	4.71217	1	0.441803	29.6814
GOTERM_BP_FAT	GO:0032272~negative regulation of protein polymerization	5	0.657895	0.0200664	ENSMUSG00000079523, ENSMUSG00000021061, ENSMUSG00000057738, ENSMUSG00000022099, ENSMUSG00000026532	534	27	13588	4.71217	1	0.441803	29.6814
GOTERM_BP_FAT	GO:0010824~regulation of centrosome duplication	3	0.394737	0.0207404	ENSMUSG00000025758, ENSMUSG00000020580, ENSMUSG00000057113	534	6	13588	12.7228	1	0.448439	30.5168
GOTERM_BP_FAT	GO:0045941~positive regulation of transcription	29	3.81579	0.0208405	ENSMUSG00000033837, ENSMUSG00000030213, ENSMUSG00000043962, ENSMUSG00000036098, ENSMUSG00000026398, ENSMUSG00000000708, ENSMUSG00000060206, ENSMUSG00000074637, ENSMUSG00000025085, ENSMUSG00000038482, ENSMUSG00000020248, ENSMUSG00000055148, ENSMUSG00000031540, ENSMUSG00000022521, ENSMUSG00000031805, ENSMUSG00000021848, ENSMUSG00000031601, ENSMUSG00000066551, ENSMUSG00000048402, ENSMUSG00000025958,…	534	475	13588	1.55353	1	0.445806	30.6401
GOTERM_BP_FAT	GO:0006796~phosphate metabolic process	47	6.18421	0.0224075	ENSMUSG00000033295, ENSMUSG00000032113, ENSMUSG00000015222, ENSMUSG00000032936, ENSMUSG00000070348, ENSMUSG00000021413, ENSMUSG00000031155, ENSMUSG00000030647, ENSMUSG00000032562, ENSMUSG00000034573, ENSMUSG00000032346, ENSMUSG00000004285, ENSMUSG00000022781, ENSMUSG00000064363, ENSMUSG00000035064, ENSMUSG00000064367, ENSMUSG00000022788, ENSMUSG00000025758, ENSMUSG00000035725, ENSMUSG00000026753,…	534	866	13588	1.381	1	0.465855	32.5433
GOTERM_BP_FAT	GO:0006793~phosphorus metabolic process	47	6.18421	0.0224075	ENSMUSG00000033295, ENSMUSG00000032113, ENSMUSG00000015222, ENSMUSG00000032936, ENSMUSG00000070348, ENSMUSG00000021413, ENSMUSG00000031155, ENSMUSG00000030647, ENSMUSG00000032562, ENSMUSG00000034573, ENSMUSG00000032346, ENSMUSG00000004285, ENSMUSG00000022781, ENSMUSG00000064363, ENSMUSG00000035064, ENSMUSG00000064367, ENSMUSG00000022788, ENSMUSG00000025758, ENSMUSG00000035725, ENSMUSG00000026753,…	534	866	13588	1.381	1	0.465855	32.5433
GOTERM_BP_FAT	GO:0045893~positive regulation of transcription, DNA-dependent	26	3.42105	0.0226096	ENSMUSG00000033837, ENSMUSG00000030213, ENSMUSG00000025958, ENSMUSG00000043962, ENSMUSG00000036098, ENSMUSG00000050567, ENSMUSG00000026398, ENSMUSG00000027547, ENSMUSG00000035158, ENSMUSG00000000708, ENSMUSG00000060206, ENSMUSG00000074637, ENSMUSG00000038482, ENSMUSG00000025085, ENSMUSG00000020248, ENSMUSG00000055799, ENSMUSG00000022521, ENSMUSG00000031099, ENSMUSG00000031805, ENSMUSG00000036940,…	534	416	13588	1.59036	1	0.464684	32.7851
GOTERM_BP_FAT	GO:0009394~2'-deoxyribonucleotide metabolic process	4	0.526316	0.0229578	ENSMUSG00000071359, ENSMUSG00000027203, ENSMUSG00000025747, ENSMUSG00000039197	534	16	13588	6.36142	1	0.465702	33.1999
GOTERM_BP_FAT	GO:0048285~organelle fission	15	1.97368	0.0233302	ENSMUSG00000030867, ENSMUSG00000061665, ENSMUSG00000025925, ENSMUSG00000024277, ENSMUSG00000022678, ENSMUSG00000074476, ENSMUSG00000028059, ENSMUSG00000033952, ENSMUSG00000056758, ENSMUSG00000034906, ENSMUSG00000040549, ENSMUSG00000001403, ENSMUSG00000027306, ENSMUSG00000062380, ENSMUSG00000024974	534	197	13588	1.93749	1	0.467046	33.6409
GOTERM_BP_FAT	GO:0044087~regulation of cellular component biogenesis	9	1.18421	0.0233526	ENSMUSG00000079523, ENSMUSG00000030213, ENSMUSG00000021061, ENSMUSG00000047139, ENSMUSG00000021754, ENSMUSG00000057738, ENSMUSG00000022099, ENSMUSG00000026532, ENSMUSG00000013663	534	89	13588	2.57316	1	0.463313	33.6672
GOTERM_BP_FAT	GO:0010558~negative regulation of macromolecule biosynthetic process	26	3.42105	0.0236947	ENSMUSG00000033837, ENSMUSG00000030213, ENSMUSG00000040363, ENSMUSG00000037608, ENSMUSG00000025246, ENSMUSG00000035478, ENSMUSG00000026739, ENSMUSG00000074637, ENSMUSG00000029131, ENSMUSG00000027630, ENSMUSG00000031540, ENSMUSG00000072945, ENSMUSG00000029836, ENSMUSG00000048402, ENSMUSG00000030067, ENSMUSG00000020653, ENSMUSG00000020661, ENSMUSG00000068284, ENSMUSG00000027547, ENSMUSG00000027478,…	534	418	13588	1.58275	1	0.46423	34.0698
GOTERM_BP_FAT	GO:0051254~positive regulation of RNA metabolic process	26	3.42105	0.0244073	ENSMUSG00000033837, ENSMUSG00000030213, ENSMUSG00000025958, ENSMUSG00000043962, ENSMUSG00000036098, ENSMUSG00000050567, ENSMUSG00000026398, ENSMUSG00000027547, ENSMUSG00000035158, ENSMUSG00000000708, ENSMUSG00000060206, ENSMUSG00000074637, ENSMUSG00000038482, ENSMUSG00000025085, ENSMUSG00000020248, ENSMUSG00000055799, ENSMUSG00000022521, ENSMUSG00000031099, ENSMUSG00000031805, ENSMUSG00000036940,…	534	419	13588	1.57897	1	0.470322	34.9007
GOTERM_BP_FAT	GO:0016310~phosphorylation	40	5.26316	0.0245153	ENSMUSG00000032113, ENSMUSG00000015222, ENSMUSG00000032936, ENSMUSG00000070348, ENSMUSG00000021413, ENSMUSG00000031155, ENSMUSG00000030647, ENSMUSG00000032562, ENSMUSG00000032346, ENSMUSG00000004285, ENSMUSG00000022781, ENSMUSG00000064363, ENSMUSG00000035064, ENSMUSG00000064367, ENSMUSG00000022788, ENSMUSG00000025758, ENSMUSG00000035725, ENSMUSG00000031805, ENSMUSG00000027298, ENSMUSG00000063410,…	534	718	13588	1.41759	1	0.467893	35.0258
GOTERM_BP_FAT	GO:0031175~neuron projection development	16	2.10526	0.0247296	ENSMUSG00000025958, ENSMUSG00000015222, ENSMUSG00000000120, ENSMUSG00000026782, ENSMUSG00000021662, ENSMUSG00000069601, ENSMUSG00000025085, ENSMUSG00000022055, ENSMUSG00000026235, ENSMUSG00000022995, ENSMUSG00000047139, ENSMUSG00000022601, ENSMUSG00000027168, ENSMUSG00000048402, ENSMUSG00000031139, ENSMUSG00000013663	534	218	13588	1.86757	1	0.466971	35.2733
GOTERM_BP_FAT	GO:0030182~neuron differentiation	25	3.28947	0.0248915	ENSMUSG00000000120, ENSMUSG00000025958, ENSMUSG00000015222, ENSMUSG00000025223, ENSMUSG00000026782, ENSMUSG00000021662, ENSMUSG00000063810, ENSMUSG00000069601, ENSMUSG00000074637, ENSMUSG00000066129, ENSMUSG00000025085, ENSMUSG00000022055, ENSMUSG00000026235, ENSMUSG00000022995, ENSMUSG00000014773, ENSMUSG00000047139, ENSMUSG00000031099, ENSMUSG00000022601, ENSMUSG00000062380, ENSMUSG00000021848,…	534	399	13588	1.59434	1	0.465355	35.4597
GOTERM_BP_FAT	GO:0021983~pituitary gland development	5	0.657895	0.0255444	ENSMUSG00000025958, ENSMUSG00000074637, ENSMUSG00000036940, ENSMUSG00000027168, ENSMUSG00000048402	534	29	13588	4.38719	1	0.470366	36.2063
GOTERM_BP_FAT	GO:0008361~regulation of cell size	10	1.31579	0.0259863	ENSMUSG00000029014, ENSMUSG00000025958, ENSMUSG00000066652, ENSMUSG00000028657, ENSMUSG00000027433, ENSMUSG00000030168, ENSMUSG00000035107, ENSMUSG00000018442, ENSMUSG00000038793, ENSMUSG00000057113	534	108	13588	2.35608	1	0.472457	36.707
GOTERM_BP_FAT	GO:0046578~regulation of Ras protein signal transduction	14	1.84211	0.0261379	ENSMUSG00000031442, ENSMUSG00000039713, ENSMUSG00000031709, ENSMUSG00000017631, ENSMUSG00000022788, ENSMUSG00000030265, ENSMUSG00000020640, ENSMUSG00000020130, ENSMUSG00000021662, ENSMUSG00000026721, ENSMUSG00000021895, ENSMUSG00000028059, ENSMUSG00000031139, ENSMUSG00000025265	534	181	13588	1.96818	1	0.470719	36.8779
GOTERM_BP_FAT	GO:0030004~cellular monovalent inorganic cation homeostasis	4	0.526316	0.0270832	ENSMUSG00000007107, ENSMUSG00000028657, ENSMUSG00000022125, ENSMUSG00000019970	534	17	13588	5.98722	1	0.479204	37.9339
GOTERM_BP_FAT	GO:0010557~positive regulation of macromolecule biosynthetic process	31	4.07895	0.0273738	ENSMUSG00000033837, ENSMUSG00000030213, ENSMUSG00000056216, ENSMUSG00000043962, ENSMUSG00000036098, ENSMUSG00000026398, ENSMUSG00000000708, ENSMUSG00000060206, ENSMUSG00000074637, ENSMUSG00000025085, ENSMUSG00000038482, ENSMUSG00000020248, ENSMUSG00000055148, ENSMUSG00000031540, ENSMUSG00000022521, ENSMUSG00000031805, ENSMUSG00000021848, ENSMUSG00000031601, ENSMUSG00000066551, ENSMUSG00000048402,…	534	530	13588	1.48833	1	0.479207	38.2551
GOTERM_BP_FAT	GO:0045333~cellular respiration	7	0.921053	0.0275487	ENSMUSG00000027010, ENSMUSG00000064367, ENSMUSG00000030647, ENSMUSG00000002010, ENSMUSG00000064370, ENSMUSG00000064363, ENSMUSG00000064354	534	59	13588	3.01898	1	0.477768	38.4477
GOTERM_BP_FAT	GO:0016570~histone modification	9	1.18421	0.0278357	ENSMUSG00000031540, ENSMUSG00000022521, ENSMUSG00000029913, ENSMUSG00000035478, ENSMUSG00000000708, ENSMUSG00000026739, ENSMUSG00000036940, ENSMUSG00000025932, ENSMUSG00000037315	534	92	13588	2.48925	1	0.477744	38.7626
GOTERM_BP_FAT	GO:0006091~generation of precursor metabolites and energy	18	2.36842	0.0281412	ENSMUSG00000027010, ENSMUSG00000021072, ENSMUSG00000022490, ENSMUSG00000021913, ENSMUSG00000017390, ENSMUSG00000030647, ENSMUSG00000002010, ENSMUSG00000064370, ENSMUSG00000004285, ENSMUSG00000064363, ENSMUSG00000064354, ENSMUSG00000064341, ENSMUSG00000064367, ENSMUSG00000044894, ENSMUSG00000038600, ENSMUSG00000030246, ENSMUSG00000057666, ENSMUSG00000021114	534	261	13588	1.75488	1	0.477948	39.096
GOTERM_BP_FAT	GO:0006357~regulation of transcription from RNA polymerase II promoter	35	4.60526	0.0282747	ENSMUSG00000033837, ENSMUSG00000030213, ENSMUSG00000056216, ENSMUSG00000040363, ENSMUSG00000043962, ENSMUSG00000026398, ENSMUSG00000025246, ENSMUSG00000035478, ENSMUSG00000000708, ENSMUSG00000060206, ENSMUSG00000026739, ENSMUSG00000074637, ENSMUSG00000025085, ENSMUSG00000022521, ENSMUSG00000031805, ENSMUSG00000028640, ENSMUSG00000001604, ENSMUSG00000021848, ENSMUSG00000031601, ENSMUSG00000066551,…	534	616	13588	1.44578	1	0.476063	39.2412
GOTERM_BP_FAT	GO:0046605~regulation of centrosome cycle	3	0.394737	0.02829	ENSMUSG00000025758, ENSMUSG00000020580, ENSMUSG00000057113	534	7	13588	10.9053	1	0.47278	39.2578
GOTERM_BP_FAT	GO:0007549~dosage compensation	3	0.394737	0.02829	ENSMUSG00000024054, ENSMUSG00000015937, ENSMUSG00000020086	534	7	13588	10.9053	1	0.47278	39.2578
GOTERM_BP_FAT	GO:0016071~mRNA metabolic process	20	2.63158	0.0289096	ENSMUSG00000062078, ENSMUSG00000056216, ENSMUSG00000020409, ENSMUSG00000030216, ENSMUSG00000021413, ENSMUSG00000040728, ENSMUSG00000032621, ENSMUSG00000028675, ENSMUSG00000027498, ENSMUSG00000022283, ENSMUSG00000028180, ENSMUSG00000000568, ENSMUSG00000020994, ENSMUSG00000028134, ENSMUSG00000027433, ENSMUSG00000038446, ENSMUSG00000061479, ENSMUSG00000031256, ENSMUSG00000024472, ENSMUSG00000046434	534	302	13588	1.68515	1	0.476782	39.9271
GOTERM_BP_FAT	GO:0030833~regulation of actin filament polymerization	6	0.789474	0.0306254	ENSMUSG00000079523, ENSMUSG00000021061, ENSMUSG00000021754, ENSMUSG00000057738, ENSMUSG00000022099, ENSMUSG00000026532	534	45	13588	3.39276	1	0.493352	41.7446
GOTERM_BP_FAT	GO:0032886~regulation of microtubule-based process	6	0.789474	0.0306254	ENSMUSG00000015222, ENSMUSG00000032479, ENSMUSG00000025758, ENSMUSG00000020580, ENSMUSG00000028059, ENSMUSG00000057113	534	45	13588	3.39276	1	0.493352	41.7446
GOTERM_BP_FAT	GO:0007389~pattern specification process	19	2.5	0.0308429	ENSMUSG00000033837, ENSMUSG00000025223, ENSMUSG00000000142, ENSMUSG00000073678, ENSMUSG00000026739, ENSMUSG00000032346, ENSMUSG00000031548, ENSMUSG00000038793, ENSMUSG00000055799, ENSMUSG00000025491, ENSMUSG00000014773, ENSMUSG00000021466, ENSMUSG00000021264, ENSMUSG00000072945, ENSMUSG00000025932, ENSMUSG00000021848, ENSMUSG00000022911, ENSMUSG00000027168, ENSMUSG00000048402	534	284	13588	1.70235	1	0.4924	41.9712
GOTERM_BP_FAT	GO:0051960~regulation of nervous system development	12	1.57895	0.0313293	ENSMUSG00000022055, ENSMUSG00000036098, ENSMUSG00000047139, ENSMUSG00000014773, ENSMUSG00000021451, ENSMUSG00000020027, ENSMUSG00000074637, ENSMUSG00000025932, ENSMUSG00000033952, ENSMUSG00000066129, ENSMUSG00000027168, ENSMUSG00000048402	534	148	13588	2.06316	1	0.494482	42.475
GOTERM_BP_FAT	GO:0033014~tetrapyrrole biosynthetic process	4	0.526316	0.0315761	ENSMUSG00000021061, ENSMUSG00000022742, ENSMUSG00000026532, ENSMUSG00000032126	534	18	13588	5.6546	1	0.493868	42.7291
GOTERM_BP_FAT	GO:0006779~porphyrin biosynthetic process	4	0.526316	0.0315761	ENSMUSG00000021061, ENSMUSG00000022742, ENSMUSG00000026532, ENSMUSG00000032126	534	18	13588	5.6546	1	0.493868	42.7291
GOTERM_BP_FAT	GO:0031327~negative regulation of cellular biosynthetic process	26	3.42105	0.0317087	ENSMUSG00000033837, ENSMUSG00000030213, ENSMUSG00000040363, ENSMUSG00000037608, ENSMUSG00000025246, ENSMUSG00000035478, ENSMUSG00000026739, ENSMUSG00000074637, ENSMUSG00000029131, ENSMUSG00000027630, ENSMUSG00000031540, ENSMUSG00000072945, ENSMUSG00000029836, ENSMUSG00000048402, ENSMUSG00000030067, ENSMUSG00000020653, ENSMUSG00000020661, ENSMUSG00000068284, ENSMUSG00000027547, ENSMUSG00000027478,…	534	430	13588	1.53858	1	0.492008	42.8652
GOTERM_BP_FAT	GO:0016055~Wnt receptor signaling pathway	11	1.44737	0.0318638	ENSMUSG00000055799, ENSMUSG00000032280, ENSMUSG00000025223, ENSMUSG00000070348, ENSMUSG00000022855, ENSMUSG00000000142, ENSMUSG00000048047, ENSMUSG00000035158, ENSMUSG00000041075, ENSMUSG00000031548, ENSMUSG00000021319	534	130	13588	2.1531	1	0.490423	43.024
GOTERM_BP_FAT	GO:0034621~cellular macromolecular complex subunit organization	17	2.23684	0.0320413	ENSMUSG00000056216, ENSMUSG00000020409, ENSMUSG00000039361, ENSMUSG00000015937, ENSMUSG00000020086, ENSMUSG00000041415, ENSMUSG00000023004, ENSMUSG00000032346, ENSMUSG00000022995, ENSMUSG00000028134, ENSMUSG00000031540, ENSMUSG00000060081, ENSMUSG00000027433, ENSMUSG00000041096, ENSMUSG00000022601, ENSMUSG00000062380, ENSMUSG00000022353	534	245	13588	1.76562	1	0.489106	43.2051
GOTERM_BP_FAT	GO:0050767~regulation of neurogenesis	11	1.44737	0.0348662	ENSMUSG00000022055, ENSMUSG00000047139, ENSMUSG00000014773, ENSMUSG00000021451, ENSMUSG00000020027, ENSMUSG00000074637, ENSMUSG00000025932, ENSMUSG00000033952, ENSMUSG00000066129, ENSMUSG00000027168, ENSMUSG00000048402	534	132	13588	2.12047	1	0.515689	46.0167
GOTERM_BP_FAT	GO:0009890~negative regulation of biosynthetic process	26	3.42105	0.0349777	ENSMUSG00000033837, ENSMUSG00000030213, ENSMUSG00000040363, ENSMUSG00000037608, ENSMUSG00000025246, ENSMUSG00000035478, ENSMUSG00000026739, ENSMUSG00000074637, ENSMUSG00000029131, ENSMUSG00000027630, ENSMUSG00000031540, ENSMUSG00000072945, ENSMUSG00000029836, ENSMUSG00000048402, ENSMUSG00000030067, ENSMUSG00000020653, ENSMUSG00000020661, ENSMUSG00000068284, ENSMUSG00000027547, ENSMUSG00000027478,…	534	434	13588	1.5244	1	0.513565	46.125
GOTERM_BP_FAT	GO:0051693~actin filament capping	4	0.526316	0.0364332	ENSMUSG00000021061, ENSMUSG00000057738, ENSMUSG00000022099, ENSMUSG00000026532	534	19	13588	5.35699	1	0.524939	47.5193
GOTERM_BP_FAT	GO:0009263~deoxyribonucleotide biosynthetic process	3	0.394737	0.0367535	ENSMUSG00000071359, ENSMUSG00000025747, ENSMUSG00000039197	534	8	13588	9.54213	1	0.524863	47.8215
GOTERM_BP_FAT	GO:0006396~RNA processing	26	3.42105	0.0377423	ENSMUSG00000062078, ENSMUSG00000030216, ENSMUSG00000025260, ENSMUSG00000021413, ENSMUSG00000040728, ENSMUSG00000052488, ENSMUSG00000032621, ENSMUSG00000022283, ENSMUSG00000028180, ENSMUSG00000028134, ENSMUSG00000021243, ENSMUSG00000027433, ENSMUSG00000013736, ENSMUSG00000061479, ENSMUSG00000031256, ENSMUSG00000063785, ENSMUSG00000020409, ENSMUSG00000060739, ENSMUSG00000041415, ENSMUSG00000032288,…	534	437	13588	1.51393	1	0.531245	48.7442
GOTERM_BP_FAT	GO:0007017~microtubule-based process	15	1.97368	0.0386079	ENSMUSG00000015222, ENSMUSG00000022629, ENSMUSG00000069135, ENSMUSG00000023004, ENSMUSG00000022678, ENSMUSG00000026490, ENSMUSG00000022055, ENSMUSG00000052566, ENSMUSG00000027433, ENSMUSG00000040549, ENSMUSG00000027306, ENSMUSG00000062380, ENSMUSG00000057113, ENSMUSG00000024068, ENSMUSG00000024974	534	211	13588	1.80894	1	0.536281	49.5393
GOTERM_BP_FAT	GO:0043543~protein amino acid acylation	6	0.789474	0.0390505	ENSMUSG00000031540, ENSMUSG00000022521, ENSMUSG00000035478, ENSMUSG00000000708, ENSMUSG00000026739, ENSMUSG00000037315	534	48	13588	3.18071	1	0.537257	49.9413
GOTERM_BP_FAT	GO:0010605~negative regulation of macromolecule metabolic process	29	3.81579	0.0417696	ENSMUSG00000033837, ENSMUSG00000030213, ENSMUSG00000040363, ENSMUSG00000037608, ENSMUSG00000025246, ENSMUSG00000035478, ENSMUSG00000026739, ENSMUSG00000074637, ENSMUSG00000029131, ENSMUSG00000027630, ENSMUSG00000031540, ENSMUSG00000072945, ENSMUSG00000029836, ENSMUSG00000048402, ENSMUSG00000030067, ENSMUSG00000020653, ENSMUSG00000057113, ENSMUSG00000020661, ENSMUSG00000068284, ENSMUSG00000027547,…	534	506	13588	1.45835	1	0.558757	52.3458
GOTERM_BP_FAT	GO:0051329~interphase of mitotic cell cycle	6	0.789474	0.0421426	ENSMUSG00000029014, ENSMUSG00000027552, ENSMUSG00000032113, ENSMUSG00000070348, ENSMUSG00000019982, ENSMUSG00000038482	534	49	13588	3.1158	1	0.558883	52.667
GOTERM_BP_FAT	GO:0050885~neuromuscular process controlling balance	5	0.657895	0.0428383	ENSMUSG00000022055, ENSMUSG00000031996, ENSMUSG00000021665, ENSMUSG00000074637, ENSMUSG00000028224	534	34	13588	3.74201	1	0.561801	53.2606
GOTERM_BP_FAT	GO:0045665~negative regulation of neuron differentiation	5	0.657895	0.0428383	ENSMUSG00000047139, ENSMUSG00000014773, ENSMUSG00000074637, ENSMUSG00000033952, ENSMUSG00000027168	534	34	13588	3.74201	1	0.561801	53.2606
GOTERM_BP_FAT	GO:0048232~male gamete generation	17	2.23684	0.043399	ENSMUSG00000020661, ENSMUSG00000062078, ENSMUSG00000071359, ENSMUSG00000026915, ENSMUSG00000040850, ENSMUSG00000026790, ENSMUSG00000032280, ENSMUSG00000049470, ENSMUSG00000023015, ENSMUSG00000001157, ENSMUSG00000063810, ENSMUSG00000053470, ENSMUSG00000022652, ENSMUSG00000027433, ENSMUSG00000032431, ENSMUSG00000033985, ENSMUSG00000039224	534	255	13588	1.69638	1	0.563505	53.734
GOTERM_BP_FAT	GO:0007283~spermatogenesis	17	2.23684	0.043399	ENSMUSG00000020661, ENSMUSG00000062078, ENSMUSG00000071359, ENSMUSG00000026915, ENSMUSG00000040850, ENSMUSG00000026790, ENSMUSG00000032280, ENSMUSG00000049470, ENSMUSG00000023015, ENSMUSG00000001157, ENSMUSG00000063810, ENSMUSG00000053470, ENSMUSG00000022652, ENSMUSG00000027433, ENSMUSG00000032431, ENSMUSG00000033985, ENSMUSG00000039224	534	255	13588	1.69638	1	0.563505	53.734
GOTERM_BP_FAT	GO:0065003~macromolecular complex assembly	21	2.76316	0.043995	ENSMUSG00000020409, ENSMUSG00000071359, ENSMUSG00000039361, ENSMUSG00000015937, ENSMUSG00000020086, ENSMUSG00000041415, ENSMUSG00000023004, ENSMUSG00000032346, ENSMUSG00000000303, ENSMUSG00000001910, ENSMUSG00000001930, ENSMUSG00000028134, ENSMUSG00000031540, ENSMUSG00000060081, ENSMUSG00000041096, ENSMUSG00000020962, ENSMUSG00000022601, ENSMUSG00000062380, ENSMUSG00000022353, ENSMUSG00000057113,…	534	338	13588	1.58095	1	0.565474	54.2322
GOTERM_BP_FAT	GO:0001654~eye development	12	1.57895	0.0450466	ENSMUSG00000041235, ENSMUSG00000021754, ENSMUSG00000026782, ENSMUSG00000021264, ENSMUSG00000035158, ENSMUSG00000063810, ENSMUSG00000022601, ENSMUSG00000074637, ENSMUSG00000021848, ENSMUSG00000027168, ENSMUSG00000066551, ENSMUSG00000022656	534	157	13588	1.94489	1	0.571177	55.099
GOTERM_BP_FAT	GO:0030030~cell projection organization	20	2.63158	0.0457199	ENSMUSG00000025958, ENSMUSG00000015222, ENSMUSG00000000120, ENSMUSG00000026782, ENSMUSG00000021662, ENSMUSG00000063810, ENSMUSG00000069601, ENSMUSG00000025085, ENSMUSG00000022055, ENSMUSG00000023022, ENSMUSG00000026235, ENSMUSG00000022995, ENSMUSG00000047139, ENSMUSG00000022788, ENSMUSG00000022601, ENSMUSG00000022353, ENSMUSG00000031139, ENSMUSG00000027168, ENSMUSG00000048402, ENSMUSG00000013663	534	319	13588	1.59534	1	0.573654	55.6458
GOTERM_BP_FAT	GO:0048732~gland development	14	1.84211	0.0467779	ENSMUSG00000000303, ENSMUSG00000025958, ENSMUSG00000070348, ENSMUSG00000021466, ENSMUSG00000020027, ENSMUSG00000074637, ENSMUSG00000036940, ENSMUSG00000022587, ENSMUSG00000032796, ENSMUSG00000027239, ENSMUSG00000031548, ENSMUSG00000027168, ENSMUSG00000048402, ENSMUSG00000013663	534	197	13588	1.80832	1	0.579159	56.4923
GOTERM_BP_FAT	GO:0060284~regulation of cell development	12	1.57895	0.0485782	ENSMUSG00000022055, ENSMUSG00000047139, ENSMUSG00000014773, ENSMUSG00000021451, ENSMUSG00000020027, ENSMUSG00000020427, ENSMUSG00000074637, ENSMUSG00000025932, ENSMUSG00000033952, ENSMUSG00000066129, ENSMUSG00000027168, ENSMUSG00000048402	534	159	13588	1.92043	1	0.590279	57.8979
GOTERM_BP_FAT	GO:0051325~interphase	6	0.789474	0.048758	ENSMUSG00000029014, ENSMUSG00000027552, ENSMUSG00000032113, ENSMUSG00000070348, ENSMUSG00000019982, ENSMUSG00000038482	534	51	13588	2.99361	1	0.58868	58.0359
GOTERM_BP_FAT	GO:0018130~heterocycle biosynthetic process	6	0.789474	0.048758	ENSMUSG00000021061, ENSMUSG00000022742, ENSMUSG00000026532, ENSMUSG00000029735, ENSMUSG00000039197, ENSMUSG00000032126	534	51	13588	2.99361	1	0.58868	58.0359
GOTERM_BP_FAT	GO:0051130~positive regulation of cellular component organization	10	1.31579	0.0505461	ENSMUSG00000022055, ENSMUSG00000047139, ENSMUSG00000021754, ENSMUSG00000028657, ENSMUSG00000021451, ENSMUSG00000025758, ENSMUSG00000020580, ENSMUSG00000030122, ENSMUSG00000027306, ENSMUSG00000057113	534	122	13588	2.08571	1	0.599238	59.3853
GOTERM_BP_FAT	GO:0042127~regulation of cell proliferation	30	3.94737	0.0513436	ENSMUSG00000052488, ENSMUSG00000009073, ENSMUSG00000026398, ENSMUSG00000026739, ENSMUSG00000074637, ENSMUSG00000032562, ENSMUSG00000033307, ENSMUSG00000028224, ENSMUSG00000038793, ENSMUSG00000022101, ENSMUSG00000047139, ENSMUSG00000037169, ENSMUSG00000030067, ENSMUSG00000048402, ENSMUSG00000066551, ENSMUSG00000057113, ENSMUSG00000013663, ENSMUSG00000001435, ENSMUSG00000000120, ENSMUSG00000030265,…	534	538	13588	1.4189	1	0.602185	59.9739
GOTERM_BP_FAT	GO:0007155~cell adhesion	31	4.07895	0.0530378	ENSMUSG00000033295, ENSMUSG00000025969, ENSMUSG00000047501, ENSMUSG00000061665, ENSMUSG00000005397, ENSMUSG00000035107, ENSMUSG00000029131, ENSMUSG00000047139, ENSMUSG00000026193, ENSMUSG00000027298, ENSMUSG00000048758, ENSMUSG00000021806, ENSMUSG00000032796, ENSMUSG00000035493, ENSMUSG00000001435, ENSMUSG00000029304, ENSMUSG00000023118, ENSMUSG00000061048, ENSMUSG00000021614, ENSMUSG00000022656,…	534	561	13588	1.40609	1	0.611501	61.1977
GOTERM_BP_FAT	GO:0006213~pyrimidine nucleoside metabolic process	4	0.526316	0.0531347	ENSMUSG00000071359, ENSMUSG00000027203, ENSMUSG00000060090, ENSMUSG00000020407	534	22	13588	4.62649	1	0.609287	61.2666
GOTERM_BP_FAT	GO:0007040~lysosome organization	4	0.526316	0.0531347	ENSMUSG00000052566, ENSMUSG00000021665, ENSMUSG00000028657, ENSMUSG00000022125	534	22	13588	4.62649	1	0.609287	61.2666
GOTERM_BP_FAT	GO:0006928~cell motion	22	2.89474	0.0532611	ENSMUSG00000025969, ENSMUSG00000039713, ENSMUSG00000026915, ENSMUSG00000000120, ENSMUSG00000061665, ENSMUSG00000007107, ENSMUSG00000026782, ENSMUSG00000039552, ENSMUSG00000022678, ENSMUSG00000069601, ENSMUSG00000025608, ENSMUSG00000038793, ENSMUSG00000025085, ENSMUSG00000022995, ENSMUSG00000026235, ENSMUSG00000047139, ENSMUSG00000041112, ENSMUSG00000027777, ENSMUSG00000022601, ENSMUSG00000048402,…	534	367	13588	1.52535	1	0.607304	61.3564
GOTERM_BP_FAT	GO:0022610~biological adhesion	31	4.07895	0.0542646	ENSMUSG00000033295, ENSMUSG00000025969, ENSMUSG00000047501, ENSMUSG00000061665, ENSMUSG00000005397, ENSMUSG00000035107, ENSMUSG00000029131, ENSMUSG00000047139, ENSMUSG00000026193, ENSMUSG00000027298, ENSMUSG00000048758, ENSMUSG00000021806, ENSMUSG00000032796, ENSMUSG00000035493, ENSMUSG00000001435, ENSMUSG00000029304, ENSMUSG00000023118, ENSMUSG00000061048, ENSMUSG00000021614, ENSMUSG00000022656,…	534	562	13588	1.40359	1	0.611493	62.0618
GOTERM_BP_FAT	GO:0007507~heart development	15	1.97368	0.0558247	ENSMUSG00000025969, ENSMUSG00000033837, ENSMUSG00000041415, ENSMUSG00000027547, ENSMUSG00000021614, ENSMUSG00000022587, ENSMUSG00000041235, ENSMUSG00000021466, ENSMUSG00000032366, ENSMUSG00000020644, ENSMUSG00000011256, ENSMUSG00000030067, ENSMUSG00000041957, ENSMUSG00000048402, ENSMUSG00000013663	534	223	13588	1.71159	1	0.619372	63.1344
GOTERM_BP_FAT	GO:0031575~G1/S transition checkpoint	3	0.394737	0.0560951	ENSMUSG00000070348, ENSMUSG00000022601, ENSMUSG00000028224	534	10	13588	7.63371	1	0.618384	63.3174
GOTERM_BP_FAT	GO:0009219~pyrimidine deoxyribonucleotide metabolic process	3	0.394737	0.0560951	ENSMUSG00000071359, ENSMUSG00000027203, ENSMUSG00000025747	534	10	13588	7.63371	1	0.618384	63.3174
GOTERM_BP_FAT	GO:0044265~cellular macromolecule catabolic process	33	4.34211	0.0567991	ENSMUSG00000032307, ENSMUSG00000061665, ENSMUSG00000047879, ENSMUSG00000025246, ENSMUSG00000042572, ENSMUSG00000022124, ENSMUSG00000028675, ENSMUSG00000002985, ENSMUSG00000027630, ENSMUSG00000004364, ENSMUSG00000030319, ENSMUSG00000027433, ENSMUSG00000020027, ENSMUSG00000017843, ENSMUSG00000018363, ENSMUSG00000001403, ENSMUSG00000025860, ENSMUSG00000034391, ENSMUSG00000020738, ENSMUSG00000014769,…	534	609	13588	1.37883	1	0.620309	63.7898
GOTERM_BP_FAT	GO:0010604~positive regulation of macromolecule metabolic process	34	4.47368	0.0583125	ENSMUSG00000033837, ENSMUSG00000030213, ENSMUSG00000056216, ENSMUSG00000043962, ENSMUSG00000036098, ENSMUSG00000026398, ENSMUSG00000000708, ENSMUSG00000060206, ENSMUSG00000074637, ENSMUSG00000025085, ENSMUSG00000038482, ENSMUSG00000020248, ENSMUSG00000055148, ENSMUSG00000047139, ENSMUSG00000031540, ENSMUSG00000022521, ENSMUSG00000031805, ENSMUSG00000021848, ENSMUSG00000031601, ENSMUSG00000066551,…	534	633	13588	1.36675	1	0.627497	64.7859
GOTERM_BP_FAT	GO:0006305~DNA alkylation	4	0.526316	0.0593875	ENSMUSG00000020661, ENSMUSG00000030213, ENSMUSG00000026723, ENSMUSG00000027478	534	23	13588	4.42534	1	0.631669	65.4777
GOTERM_BP_FAT	GO:0006306~DNA methylation	4	0.526316	0.0593875	ENSMUSG00000020661, ENSMUSG00000030213, ENSMUSG00000026723, ENSMUSG00000027478	534	23	13588	4.42534	1	0.631669	65.4777
GOTERM_BP_FAT	GO:0009262~deoxyribonucleotide metabolic process	4	0.526316	0.0593875	ENSMUSG00000071359, ENSMUSG00000027203, ENSMUSG00000025747, ENSMUSG00000039197	534	23	13588	4.42534	1	0.631669	65.4777
GOTERM_BP_FAT	GO:0045926~negative regulation of growth	7	0.921053	0.0595002	ENSMUSG00000029014, ENSMUSG00000021466, ENSMUSG00000028657, ENSMUSG00000020027, ENSMUSG00000002010, ENSMUSG00000030168, ENSMUSG00000035107	534	71	13588	2.50873	1	0.629654	65.5496
GOTERM_BP_FAT	GO:0021536~diencephalon development	5	0.657895	0.0604249	ENSMUSG00000025958, ENSMUSG00000074637, ENSMUSG00000036940, ENSMUSG00000027168, ENSMUSG00000048402	534	38	13588	3.34812	1	0.632791	66.1332
GOTERM_BP_FAT	GO:0035270~endocrine system development	7	0.921053	0.0628665	ENSMUSG00000025958, ENSMUSG00000074637, ENSMUSG00000036940, ENSMUSG00000022587, ENSMUSG00000027239, ENSMUSG00000027168, ENSMUSG00000048402	534	72	13588	2.47389	1	0.645139	67.6299
GOTERM_BP_FAT	GO:0030900~forebrain development	12	1.57895	0.0645662	ENSMUSG00000025958, ENSMUSG00000031996, ENSMUSG00000041703, ENSMUSG00000073678, ENSMUSG00000022678, ENSMUSG00000074637, ENSMUSG00000036940, ENSMUSG00000021848, ENSMUSG00000027070, ENSMUSG00000033952, ENSMUSG00000027168, ENSMUSG00000048402	534	167	13588	1.82843	1	0.6526	68.6349
GOTERM_BP_FAT	GO:0021532~neural tube patterning	4	0.526316	0.0659682	ENSMUSG00000021466, ENSMUSG00000026739, ENSMUSG00000027168, ENSMUSG00000048402	534	24	13588	4.24095	1	0.658108	69.4415
GOTERM_BP_FAT	GO:0006304~DNA modification	4	0.526316	0.0659682	ENSMUSG00000020661, ENSMUSG00000030213, ENSMUSG00000026723, ENSMUSG00000027478	534	24	13588	4.24095	1	0.658108	69.4415
GOTERM_BP_FAT	GO:0006468~protein amino acid phosphorylation	34	4.47368	0.0661545	ENSMUSG00000032113, ENSMUSG00000015222, ENSMUSG00000032936, ENSMUSG00000070348, ENSMUSG00000021413, ENSMUSG00000031155, ENSMUSG00000032562, ENSMUSG00000032346, ENSMUSG00000022781, ENSMUSG00000035064, ENSMUSG00000022788, ENSMUSG00000035725, ENSMUSG00000025758, ENSMUSG00000031805, ENSMUSG00000027298, ENSMUSG00000063410, ENSMUSG00000026074, ENSMUSG00000019970, ENSMUSG00000014932, ENSMUSG00000009555,…	534	640	13588	1.3518	1	0.656548	69.5472
GOTERM_BP_FAT	GO:0007379~segment specification	3	0.394737	0.0668222	ENSMUSG00000014773, ENSMUSG00000072945, ENSMUSG00000048402	534	11	13588	6.93973	1	0.657751	69.9233
GOTERM_BP_FAT	GO:0009116~nucleoside metabolic process	6	0.789474	0.067826	ENSMUSG00000071359, ENSMUSG00000027203, ENSMUSG00000020528, ENSMUSG00000060090, ENSMUSG00000039197, ENSMUSG00000020407	534	56	13588	2.72632	1	0.660824	70.4804
GOTERM_BP_FAT	GO:0006119~oxidative phosphorylation	6	0.789474	0.067826	ENSMUSG00000064367, ENSMUSG00000030647, ENSMUSG00000038600, ENSMUSG00000004285, ENSMUSG00000021114, ENSMUSG00000064363	534	56	13588	2.72632	1	0.660824	70.4804
GOTERM_BP_FAT	GO:0045944~positive regulation of transcription from RNA polymerase II promoter	21	2.76316	0.0704644	ENSMUSG00000033837, ENSMUSG00000025958, ENSMUSG00000043962, ENSMUSG00000050567, ENSMUSG00000026398, ENSMUSG00000027547, ENSMUSG00000035158, ENSMUSG00000000708, ENSMUSG00000060206, ENSMUSG00000074637, ENSMUSG00000025085, ENSMUSG00000055799, ENSMUSG00000022521, ENSMUSG00000031805, ENSMUSG00000036940, ENSMUSG00000021848, ENSMUSG00000031601, ENSMUSG00000027168, ENSMUSG00000066551, ENSMUSG00000048402,…	534	358	13588	1.49262	1	0.672741	71.8987
GOTERM_BP_FAT	GO:0032271~regulation of protein polymerization	6	0.789474	0.0720714	ENSMUSG00000079523, ENSMUSG00000021061, ENSMUSG00000021754, ENSMUSG00000057738, ENSMUSG00000022099, ENSMUSG00000026532	534	57	13588	2.67849	1	0.678743	72.7308
GOTERM_BP_FAT	GO:0031589~cell-substrate adhesion	6	0.789474	0.0720714	ENSMUSG00000001930, ENSMUSG00000005397, ENSMUSG00000026193, ENSMUSG00000033985, ENSMUSG00000048758, ENSMUSG00000021806	534	57	13588	2.67849	1	0.678743	72.7308
GOTERM_BP_FAT	GO:0022900~electron transport chain	9	1.18421	0.0731891	ENSMUSG00000064341, ENSMUSG00000027010, ENSMUSG00000021072, ENSMUSG00000064367, ENSMUSG00000044894, ENSMUSG00000030647, ENSMUSG00000064370, ENSMUSG00000064363, ENSMUSG00000064354	534	112	13588	2.04474	1	0.682047	73.2958
GOTERM_BP_FAT	GO:0042254~ribosome biogenesis	9	1.18421	0.0731891	ENSMUSG00000060739, ENSMUSG00000022191, ENSMUSG00000030216, ENSMUSG00000021243, ENSMUSG00000022601, ENSMUSG00000032288, ENSMUSG00000063785, ENSMUSG00000025266, ENSMUSG00000057113	534	112	13588	2.04474	1	0.682047	73.2958
GOTERM_BP_FAT	GO:0001756~somitogenesis	5	0.657895	0.0757595	ENSMUSG00000025491, ENSMUSG00000014773, ENSMUSG00000000142, ENSMUSG00000072945, ENSMUSG00000031548	534	41	13588	3.10313	1	0.692594	74.5536
GOTERM_BP_FAT	GO:0030003~cellular cation homeostasis	11	1.44737	0.0761102	ENSMUSG00000031996, ENSMUSG00000047139, ENSMUSG00000007107, ENSMUSG00000021665, ENSMUSG00000028657, ENSMUSG00000052488, ENSMUSG00000039953, ENSMUSG00000022125, ENSMUSG00000002985, ENSMUSG00000019970, ENSMUSG00000031765	534	152	13588	1.84146	1	0.691861	74.7208
GOTERM_BP_FAT	GO:0034374~low-density lipoprotein particle remodeling	2	0.263158	0.0769157	ENSMUSG00000024030, ENSMUSG00000002985	534	2	13588	25.4457	1	0.693376	75.1009
GOTERM_BP_FAT	GO:0010508~positive regulation of autophagy	2	0.263158	0.0769157	ENSMUSG00000031155, ENSMUSG00000035086	534	2	13588	25.4457	1	0.693376	75.1009
GOTERM_BP_FAT	GO:0009202~deoxyribonucleoside triphosphate biosynthetic process	2	0.263158	0.0769157	ENSMUSG00000071359, ENSMUSG00000039197	534	2	13588	25.4457	1	0.693376	75.1009
GOTERM_BP_FAT	GO:0010872~regulation of cholesterol esterification	2	0.263158	0.0769157	ENSMUSG00000024030, ENSMUSG00000002985	534	2	13588	25.4457	1	0.693376	75.1009
GOTERM_BP_FAT	GO:0010825~positive regulation of centrosome duplication	2	0.263158	0.0769157	ENSMUSG00000020580, ENSMUSG00000057113	534	2	13588	25.4457	1	0.693376	75.1009
GOTERM_BP_FAT	GO:0051726~regulation of cell cycle	14	1.84211	0.0779431	ENSMUSG00000027552, ENSMUSG00000032113, ENSMUSG00000070348, ENSMUSG00000030265, ENSMUSG00000028224, ENSMUSG00000027499, ENSMUSG00000021514, ENSMUSG00000020580, ENSMUSG00000025758, ENSMUSG00000027306, ENSMUSG00000022601, ENSMUSG00000066551, ENSMUSG00000057113, ENSMUSG00000013663	534	214	13588	1.66467	1	0.695943	75.578
GOTERM_BP_FAT	GO:0030641~regulation of cellular pH	3	0.394737	0.0781604	ENSMUSG00000007107, ENSMUSG00000028657, ENSMUSG00000022125	534	12	13588	6.36142	1	0.694571	75.6778
GOTERM_BP_FAT	GO:0009142~nucleoside triphosphate biosynthetic process	8	1.05263	0.079363	ENSMUSG00000071359, ENSMUSG00000007107, ENSMUSG00000038600, ENSMUSG00000004285, ENSMUSG00000060090, ENSMUSG00000021114, ENSMUSG00000025324, ENSMUSG00000039197	534	95	13588	2.1428	1	0.697925	76.2231
GOTERM_BP_FAT	GO:0042632~cholesterol homeostasis	4	0.526316	0.0800719	ENSMUSG00000047139, ENSMUSG00000026398, ENSMUSG00000063810, ENSMUSG00000002985	534	26	13588	3.91472	1	0.698891	76.5392
GOTERM_BP_FAT	GO:0033013~tetrapyrrole metabolic process	4	0.526316	0.0800719	ENSMUSG00000021061, ENSMUSG00000022742, ENSMUSG00000026532, ENSMUSG00000032126	534	26	13588	3.91472	1	0.698891	76.5392
GOTERM_BP_FAT	GO:0006778~porphyrin metabolic process	4	0.526316	0.0800719	ENSMUSG00000021061, ENSMUSG00000022742, ENSMUSG00000026532, ENSMUSG00000032126	534	26	13588	3.91472	1	0.698891	76.5392
GOTERM_BP_FAT	GO:0055092~sterol homeostasis	4	0.526316	0.0800719	ENSMUSG00000047139, ENSMUSG00000026398, ENSMUSG00000063810, ENSMUSG00000002985	534	26	13588	3.91472	1	0.698891	76.5392
GOTERM_BP_FAT	GO:0007265~Ras protein signal transduction	6	0.789474	0.0809878	ENSMUSG00000031442, ENSMUSG00000041112, ENSMUSG00000030265, ENSMUSG00000020580, ENSMUSG00000041444, ENSMUSG00000038816	534	59	13588	2.5877	1	0.700808	76.9417
GOTERM_BP_FAT	GO:0009057~macromolecule catabolic process	34	4.47368	0.0821362	ENSMUSG00000032307, ENSMUSG00000061665, ENSMUSG00000047879, ENSMUSG00000025246, ENSMUSG00000042572, ENSMUSG00000022124, ENSMUSG00000028675, ENSMUSG00000002985, ENSMUSG00000027630, ENSMUSG00000004364, ENSMUSG00000030319, ENSMUSG00000027433, ENSMUSG00000020027, ENSMUSG00000017843, ENSMUSG00000018363, ENSMUSG00000001403, ENSMUSG00000025860, ENSMUSG00000034391, ENSMUSG00000020738, ENSMUSG00000014769,…	534	654	13588	1.32286	1	0.70376	77.4371
GOTERM_BP_FAT	GO:0009141~nucleoside triphosphate metabolic process	9	1.18421	0.0824843	ENSMUSG00000071359, ENSMUSG00000027203, ENSMUSG00000007107, ENSMUSG00000038600, ENSMUSG00000004285, ENSMUSG00000060090, ENSMUSG00000021114, ENSMUSG00000025324, ENSMUSG00000039197	534	115	13588	1.9914	1	0.703018	77.5853
GOTERM_BP_FAT	GO:0045597~positive regulation of cell differentiation	12	1.57895	0.0836397	ENSMUSG00000022055, ENSMUSG00000020198, ENSMUSG00000021451, ENSMUSG00000020027, ENSMUSG00000020427, ENSMUSG00000021270, ENSMUSG00000020644, ENSMUSG00000074637, ENSMUSG00000027276, ENSMUSG00000027168, ENSMUSG00000048402, ENSMUSG00000066551	534	175	13588	1.74485	1	0.705936	78.0706
GOTERM_BP_FAT	GO:0034622~cellular macromolecular complex assembly	14	1.84211	0.084692	ENSMUSG00000020409, ENSMUSG00000015937, ENSMUSG00000039361, ENSMUSG00000028134, ENSMUSG00000031540, ENSMUSG00000060081, ENSMUSG00000020086, ENSMUSG00000041415, ENSMUSG00000041096, ENSMUSG00000023004, ENSMUSG00000022601, ENSMUSG00000032346, ENSMUSG00000062380, ENSMUSG00000022353	534	217	13588	1.64166	1	0.708339	78.504
GOTERM_BP_FAT	GO:0048729~tissue morphogenesis	15	1.97368	0.0850134	ENSMUSG00000000120, ENSMUSG00000041703, ENSMUSG00000009073, ENSMUSG00000022587, ENSMUSG00000031548, ENSMUSG00000055799, ENSMUSG00000037016, ENSMUSG00000022995, ENSMUSG00000021466, ENSMUSG00000032366, ENSMUSG00000025932, ENSMUSG00000032796, ENSMUSG00000027276, ENSMUSG00000048402, ENSMUSG00000061524	534	238	13588	1.60372	1	0.70748	78.6348
GOTERM_BP_FAT	GO:0044271~nitrogen compound biosynthetic process	18	2.36842	0.0853958	ENSMUSG00000081752, ENSMUSG00000071359, ENSMUSG00000003526, ENSMUSG00000021061, ENSMUSG00000022742, ENSMUSG00000007107, ENSMUSG00000004285, ENSMUSG00000039197, ENSMUSG00000071708, ENSMUSG00000025747, ENSMUSG00000020528, ENSMUSG00000026532, ENSMUSG00000021270, ENSMUSG00000038600, ENSMUSG00000029735, ENSMUSG00000060090, ENSMUSG00000025324, ENSMUSG00000021114, ENSMUSG00000032126	534	302	13588	1.51663	1	0.706899	78.7894
GOTERM_BP_FAT	GO:0022604~regulation of cell morphogenesis	8	1.05263	0.0864777	ENSMUSG00000022055, ENSMUSG00000019978, ENSMUSG00000021451, ENSMUSG00000026193, ENSMUSG00000026532, ENSMUSG00000038729, ENSMUSG00000066129, ENSMUSG00000025265	534	97	13588	2.09861	1	0.70938	79.221
GOTERM_BP_FAT	GO:0007266~Rho protein signal transduction	4	0.526316	0.0875726	ENSMUSG00000031442, ENSMUSG00000020580, ENSMUSG00000041444, ENSMUSG00000038816	534	27	13588	3.76973	1	0.711871	79.6494
GOTERM_BP_FAT	GO:0000910~cytokinesis	4	0.526316	0.0875726	ENSMUSG00000020580, ENSMUSG00000023015, ENSMUSG00000027306, ENSMUSG00000024068	534	27	13588	3.76973	1	0.711871	79.6494
GOTERM_BP_FAT	GO:0009200~deoxyribonucleoside triphosphate metabolic process	3	0.394737	0.0900456	ENSMUSG00000071359, ENSMUSG00000027203, ENSMUSG00000039197	534	13	13588	5.87208	1	0.72009	80.5866
GOTERM_BP_FAT	GO:0031331~positive regulation of cellular catabolic process	3	0.394737	0.0900456	ENSMUSG00000031155, ENSMUSG00000035086, ENSMUSG00000066551	534	13	13588	5.87208	1	0.72009	80.5866
GOTERM_BP_FAT	GO:0015980~energy derivation by oxidation of organic compounds	8	1.05263	0.0901669	ENSMUSG00000027010, ENSMUSG00000064367, ENSMUSG00000022490, ENSMUSG00000030647, ENSMUSG00000002010, ENSMUSG00000064370, ENSMUSG00000064363, ENSMUSG00000064354	534	98	13588	2.0772	1	0.718399	80.6315
GOTERM_BP_FAT	GO:0007411~axon guidance	8	1.05263	0.0901669	ENSMUSG00000000120, ENSMUSG00000026235, ENSMUSG00000022995, ENSMUSG00000022601, ENSMUSG00000069601, ENSMUSG00000027168, ENSMUSG00000048402, ENSMUSG00000025085	534	98	13588	2.0772	1	0.718399	80.6315
GOTERM_BP_FAT	GO:0006397~mRNA processing	16	2.10526	0.0911368	ENSMUSG00000062078, ENSMUSG00000020409, ENSMUSG00000030216, ENSMUSG00000021413, ENSMUSG00000040728, ENSMUSG00000032621, ENSMUSG00000027498, ENSMUSG00000022283, ENSMUSG00000028180, ENSMUSG00000020994, ENSMUSG00000028134, ENSMUSG00000027433, ENSMUSG00000038446, ENSMUSG00000061479, ENSMUSG00000031256, ENSMUSG00000046434	534	262	13588	1.55394	1	0.720221	80.9871
GOTERM_BP_FAT	GO:0008284~positive regulation of cell proliferation	17	2.23684	0.0924618	ENSMUSG00000001435, ENSMUSG00000000120, ENSMUSG00000030265, ENSMUSG00000026739, ENSMUSG00000074637, ENSMUSG00000032562, ENSMUSG00000022101, ENSMUSG00000021175, ENSMUSG00000001910, ENSMUSG00000047139, ENSMUSG00000037169, ENSMUSG00000018442, ENSMUSG00000048402, ENSMUSG00000030067, ENSMUSG00000027168, ENSMUSG00000066551, ENSMUSG00000057113	534	284	13588	1.52316	1	0.72345	81.4629
GOTERM_BP_FAT	GO:0051028~mRNA transport	6	0.789474	0.0954063	ENSMUSG00000062078, ENSMUSG00000030091, ENSMUSG00000000838, ENSMUSG00000022855, ENSMUSG00000029405, ENSMUSG00000046434	534	62	13588	2.46249	1	0.732976	82.4804
GOTERM_BP_FAT	GO:0032989~cellular component morphogenesis	20	2.63158	0.0963998	ENSMUSG00000001435, ENSMUSG00000071359, ENSMUSG00000025958, ENSMUSG00000000120, ENSMUSG00000021662, ENSMUSG00000063810, ENSMUSG00000069601, ENSMUSG00000032346, ENSMUSG00000028059, ENSMUSG00000004364, ENSMUSG00000026950, ENSMUSG00000025085, ENSMUSG00000022055, ENSMUSG00000026235, ENSMUSG00000022995, ENSMUSG00000019982, ENSMUSG00000022601, ENSMUSG00000032796, ENSMUSG00000048402, ENSMUSG00000027168	534	351	13588	1.4499	1	0.734699	82.8117
GOTERM_BP_FAT	GO:0008380~RNA splicing	13	1.71053	0.0978453	ENSMUSG00000062078, ENSMUSG00000020409, ENSMUSG00000030216, ENSMUSG00000021413, ENSMUSG00000032621, ENSMUSG00000040728, ENSMUSG00000022283, ENSMUSG00000028180, ENSMUSG00000020994, ENSMUSG00000028134, ENSMUSG00000038446, ENSMUSG00000061479, ENSMUSG00000046434	534	201	13588	1.64574	1	0.738109	83.2831
GOTERM_CC_FAT	GO:0043228~non-membrane-bounded organelle	122	16.0526	6.61807e-12	ENSMUSG00000024269, ENSMUSG00000061665, ENSMUSG00000025925, ENSMUSG00000029614, ENSMUSG00000069135, ENSMUSG00000034573, ENSMUSG00000000486, ENSMUSG00000028059, ENSMUSG00000024054, ENSMUSG00000019823, ENSMUSG00000023022, ENSMUSG00000019820, ENSMUSG00000052566, ENSMUSG00000022788, ENSMUSG00000041112, ENSMUSG00000019978, ENSMUSG00000026532, ENSMUSG00000048758, ENSMUSG00000062380, ENSMUSG00000060739,…	434	1919	12504	1.83166	2.44206e-09	2.44206e-09	9.12246e-09
GOTERM_CC_FAT	GO:0043232~intracellular non-membrane-bounded organelle	122	16.0526	6.61807e-12	ENSMUSG00000024269, ENSMUSG00000061665, ENSMUSG00000025925, ENSMUSG00000029614, ENSMUSG00000069135, ENSMUSG00000034573, ENSMUSG00000000486, ENSMUSG00000028059, ENSMUSG00000024054, ENSMUSG00000019823, ENSMUSG00000023022, ENSMUSG00000019820, ENSMUSG00000052566, ENSMUSG00000022788, ENSMUSG00000041112, ENSMUSG00000019978, ENSMUSG00000026532, ENSMUSG00000048758, ENSMUSG00000062380, ENSMUSG00000060739,…	434	1919	12504	1.83166	2.44206e-09	2.44206e-09	9.12246e-09
GOTERM_CC_FAT	GO:0031981~nuclear lumen	63	8.28947	6.10154e-08	ENSMUSG00000027552, ENSMUSG00000033837, ENSMUSG00000030213, ENSMUSG00000032113, ENSMUSG00000030216, ENSMUSG00000029614, ENSMUSG00000025246, ENSMUSG00000035478, ENSMUSG00000000708, ENSMUSG00000026739, ENSMUSG00000031540, ENSMUSG00000027829, ENSMUSG00000021264, ENSMUSG00000025758, ENSMUSG00000031601, ENSMUSG00000035049, ENSMUSG00000057113, ENSMUSG00000060739, ENSMUSG00000020409, ENSMUSG00000071359,…	434	883	12504	2.0556	2.25144e-05	1.12573e-05	8.41051e-05
GOTERM_CC_FAT	GO:0005856~cytoskeleton	71	9.34211	7.57483e-07	ENSMUSG00000024269, ENSMUSG00000026915, ENSMUSG00000032113, ENSMUSG00000061665, ENSMUSG00000025925, ENSMUSG00000007617, ENSMUSG00000069135, ENSMUSG00000000708, ENSMUSG00000034573, ENSMUSG00000000486, ENSMUSG00000028059, ENSMUSG00000019823, ENSMUSG00000023022, ENSMUSG00000022995, ENSMUSG00000019820, ENSMUSG00000052566, ENSMUSG00000022788, ENSMUSG00000041112, ENSMUSG00000019978, ENSMUSG00000025758,…	434	1122	12504	1.82316	0.000279472	9.31661e-05	0.00104413
GOTERM_CC_FAT	GO:0005694~chromosome	33	4.34211	2.81656e-06	ENSMUSG00000032113, ENSMUSG00000025925, ENSMUSG00000021413, ENSMUSG00000035478, ENSMUSG00000000708, ENSMUSG00000074476, ENSMUSG00000028224, ENSMUSG00000003038, ENSMUSG00000024054, ENSMUSG00000056758, ENSMUSG00000000568, ENSMUSG00000031540, ENSMUSG00000056608, ENSMUSG00000005045, ENSMUSG00000022521, ENSMUSG00000069996, ENSMUSG00000057133, ENSMUSG00000029836, ENSMUSG00000066551, ENSMUSG00000020661,…	434	378	12504	2.51525	0.00103877	0.000259794	0.00388235
GOTERM_CC_FAT	GO:0031974~membrane-enclosed lumen	71	9.34211	3.8504e-06	ENSMUSG00000033837, ENSMUSG00000027552, ENSMUSG00000030213, ENSMUSG00000032113, ENSMUSG00000022742, ENSMUSG00000030216, ENSMUSG00000029614, ENSMUSG00000025246, ENSMUSG00000035478, ENSMUSG00000020074, ENSMUSG00000022125, ENSMUSG00000000708, ENSMUSG00000026739, ENSMUSG00000027861, ENSMUSG00000031540, ENSMUSG00000027829, ENSMUSG00000021264, ENSMUSG00000025758, ENSMUSG00000027452, ENSMUSG00000031601,…	434	1174	12504	1.74241	0.00141979	0.000284119	0.00530735
GOTERM_CC_FAT	GO:0070013~intracellular organelle lumen	68	8.94737	8.49745e-06	ENSMUSG00000033837, ENSMUSG00000027552, ENSMUSG00000030213, ENSMUSG00000032113, ENSMUSG00000030216, ENSMUSG00000029614, ENSMUSG00000025246, ENSMUSG00000035478, ENSMUSG00000022125, ENSMUSG00000000708, ENSMUSG00000026739, ENSMUSG00000027861, ENSMUSG00000031540, ENSMUSG00000027829, ENSMUSG00000021264, ENSMUSG00000025758, ENSMUSG00000027452, ENSMUSG00000031601, ENSMUSG00000035049, ENSMUSG00000057113,…	434	1133	12504	1.72917	0.00313066	0.000522459	0.0117124
GOTERM_CC_FAT	GO:0043233~organelle lumen	68	8.94737	9.30858e-06	ENSMUSG00000033837, ENSMUSG00000027552, ENSMUSG00000030213, ENSMUSG00000032113, ENSMUSG00000030216, ENSMUSG00000029614, ENSMUSG00000025246, ENSMUSG00000035478, ENSMUSG00000022125, ENSMUSG00000000708, ENSMUSG00000026739, ENSMUSG00000027861, ENSMUSG00000031540, ENSMUSG00000027829, ENSMUSG00000021264, ENSMUSG00000025758, ENSMUSG00000027452, ENSMUSG00000031601, ENSMUSG00000035049, ENSMUSG00000057113,…	434	1136	12504	1.72461	0.00342899	0.000490577	0.0128304
GOTERM_CC_FAT	GO:0005654~nucleoplasm	43	5.65789	1.03382e-05	ENSMUSG00000027552, ENSMUSG00000033837, ENSMUSG00000030213, ENSMUSG00000032113, ENSMUSG00000043962, ENSMUSG00000030216, ENSMUSG00000070348, ENSMUSG00000025246, ENSMUSG00000035478, ENSMUSG00000000708, ENSMUSG00000005198, ENSMUSG00000026739, ENSMUSG00000074637, ENSMUSG00000038482, ENSMUSG00000020248, ENSMUSG00000038069, ENSMUSG00000031540, ENSMUSG00000027829, ENSMUSG00000022521, ENSMUSG00000021264,…	434	599	12504	2.06824	0.00380756	0.00047674	0.0142495
GOTERM_CC_FAT	GO:0044427~chromosomal part	28	3.68421	1.61133e-05	ENSMUSG00000032113, ENSMUSG00000025925, ENSMUSG00000000708, ENSMUSG00000035478, ENSMUSG00000074476, ENSMUSG00000028224, ENSMUSG00000003038, ENSMUSG00000024054, ENSMUSG00000056758, ENSMUSG00000031540, ENSMUSG00000056608, ENSMUSG00000022521, ENSMUSG00000069996, ENSMUSG00000005045, ENSMUSG00000057133, ENSMUSG00000029836, ENSMUSG00000020661, ENSMUSG00000015937, ENSMUSG00000020086, ENSMUSG00000027478,…	434	318	12504	2.53682	0.00592822	0.000660433	0.0222087
GOTERM_CC_FAT	GO:0015629~actin cytoskeleton	20	2.63158	9.25243e-05	ENSMUSG00000060180, ENSMUSG00000021061, ENSMUSG00000041444, ENSMUSG00000032232, ENSMUSG00000000708, ENSMUSG00000026950, ENSMUSG00000025085, ENSMUSG00000023022, ENSMUSG00000022995, ENSMUSG00000022272, ENSMUSG00000019820, ENSMUSG00000057738, ENSMUSG00000019978, ENSMUSG00000005103, ENSMUSG00000032366, ENSMUSG00000026532, ENSMUSG00000068699, ENSMUSG00000038816, ENSMUSG00000022353, ENSMUSG00000032127	434	205	12504	2.81084	0.0335668	0.00340848	0.127462
GOTERM_CC_FAT	GO:0048471~perinuclear region of cytoplasm	19	2.5	9.9468e-05	ENSMUSG00000039713, ENSMUSG00000061665, ENSMUSG00000025979, ENSMUSG00000052488, ENSMUSG00000060675, ENSMUSG00000018340, ENSMUSG00000024533, ENSMUSG00000026672, ENSMUSG00000036257, ENSMUSG00000022125, ENSMUSG00000020074, ENSMUSG00000015013, ENSMUSG00000028165, ENSMUSG00000029131, ENSMUSG00000022781, ENSMUSG00000062234, ENSMUSG00000030494, ENSMUSG00000027506, ENSMUSG00000024068	434	189	12504	2.89635	0.03604	0.0033313	0.137022
GOTERM_CC_FAT	GO:0000785~chromatin	17	2.23684	0.000194683	ENSMUSG00000020661, ENSMUSG00000015937, ENSMUSG00000020086, ENSMUSG00000035478, ENSMUSG00000027478, ENSMUSG00000003038, ENSMUSG00000040669, ENSMUSG00000024054, ENSMUSG00000056758, ENSMUSG00000041235, ENSMUSG00000031540, ENSMUSG00000056608, ENSMUSG00000060081, ENSMUSG00000069996, ENSMUSG00000005045, ENSMUSG00000057133, ENSMUSG00000029836, ENSMUSG00000059288	434	165	12504	2.96841	0.069325	0.00596921	0.268023
GOTERM_CC_FAT	GO:0044451~nucleoplasm part	35	4.60526	0.000216511	ENSMUSG00000027552, ENSMUSG00000033837, ENSMUSG00000030213, ENSMUSG00000043962, ENSMUSG00000030216, ENSMUSG00000025246, ENSMUSG00000035478, ENSMUSG00000000708, ENSMUSG00000026739, ENSMUSG00000005198, ENSMUSG00000074637, ENSMUSG00000038482, ENSMUSG00000020248, ENSMUSG00000031540, ENSMUSG00000027829, ENSMUSG00000021264, ENSMUSG00000022521, ENSMUSG00000021144, ENSMUSG00000020962, ENSMUSG00000031601,…	434	513	12504	1.96567	0.0767924	0.00612739	0.298031
GOTERM_CC_FAT	GO:0005730~nucleolus	24	3.15789	0.000496133	ENSMUSG00000060739, ENSMUSG00000030216, ENSMUSG00000029614, ENSMUSG00000067367, ENSMUSG00000035478, ENSMUSG00000042644, ENSMUSG00000044149, ENSMUSG00000032288, ENSMUSG00000031843, ENSMUSG00000025266, ENSMUSG00000026234, ENSMUSG00000000838, ENSMUSG00000024002, ENSMUSG00000021243, ENSMUSG00000070544, ENSMUSG00000027433, ENSMUSG00000059669, ENSMUSG00000031004, ENSMUSG00000025758, ENSMUSG00000032178,…	434	310	12504	2.23053	0.167331	0.0129947	0.681717
GOTERM_CC_FAT	GO:0005720~nuclear heterochromatin	7	0.921053	0.00115141	ENSMUSG00000024054, ENSMUSG00000040669, ENSMUSG00000020661, ENSMUSG00000015937, ENSMUSG00000020086, ENSMUSG00000027478, ENSMUSG00000029836	434	35	12504	5.76221	0.346304	0.0279431	1.5755
GOTERM_CC_FAT	GO:0005938~cell cortex	13	1.71053	0.00140335	ENSMUSG00000061665, ENSMUSG00000021061, ENSMUSG00000041444, ENSMUSG00000053799, ENSMUSG00000032346, ENSMUSG00000002006, ENSMUSG00000000486, ENSMUSG00000019820, ENSMUSG00000057738, ENSMUSG00000022099, ENSMUSG00000026532, ENSMUSG00000041359, ENSMUSG00000039735	434	126	12504	2.97257	0.404408	0.0318686	1.91715
GOTERM_CC_FAT	GO:0000792~heterochromatin	8	1.05263	0.00176356	ENSMUSG00000024054, ENSMUSG00000040669, ENSMUSG00000020661, ENSMUSG00000015937, ENSMUSG00000020086, ENSMUSG00000035478, ENSMUSG00000027478, ENSMUSG00000029836	434	51	12504	4.51938	0.478648	0.0375888	2.40372
GOTERM_CC_FAT	GO:0030529~ribonucleoprotein complex	29	3.81579	0.00290884	ENSMUSG00000021413, ENSMUSG00000029614, ENSMUSG00000032621, ENSMUSG00000028675, ENSMUSG00000023495, ENSMUSG00000022283, ENSMUSG00000000568, ENSMUSG00000028134, ENSMUSG00000000948, ENSMUSG00000060499, ENSMUSG00000048758, ENSMUSG00000069769, ENSMUSG00000061479, ENSMUSG00000022601, ENSMUSG00000063785, ENSMUSG00000057113, ENSMUSG00000057322, ENSMUSG00000020409, ENSMUSG00000060739, ENSMUSG00000041415,…	434	462	12504	1.80849	0.658677	0.05797	3.93591
GOTERM_CC_FAT	GO:0005667~transcription factor complex	18	2.36842	0.0032359	ENSMUSG00000033837, ENSMUSG00000027552, ENSMUSG00000071359, ENSMUSG00000030213, ENSMUSG00000025958, ENSMUSG00000027547, ENSMUSG00000025246, ENSMUSG00000074637, ENSMUSG00000038482, ENSMUSG00000020248, ENSMUSG00000037343, ENSMUSG00000021264, ENSMUSG00000022521, ENSMUSG00000059669, ENSMUSG00000020962, ENSMUSG00000036940, ENSMUSG00000027168, ENSMUSG00000031601	434	234	12504	2.21624	0.697594	0.0610063	4.36935
GOTERM_CC_FAT	GO:0070161~anchoring junction	12	1.57895	0.00358633	ENSMUSG00000021782, ENSMUSG00000000303, ENSMUSG00000023022, ENSMUSG00000022995, ENSMUSG00000062234, ENSMUSG00000020994, ENSMUSG00000057738, ENSMUSG00000026782, ENSMUSG00000009073, ENSMUSG00000061048, ENSMUSG00000041957, ENSMUSG00000022656	434	123	12504	2.81084	0.734393	0.0641376	4.83174
GOTERM_CC_FAT	GO:0005912~adherens junction	11	1.44737	0.00367391	ENSMUSG00000021782, ENSMUSG00000000303, ENSMUSG00000023022, ENSMUSG00000022995, ENSMUSG00000062234, ENSMUSG00000057738, ENSMUSG00000026782, ENSMUSG00000009073, ENSMUSG00000061048, ENSMUSG00000041957, ENSMUSG00000022656	434	106	12504	2.98983	0.742869	0.0626277	4.94698
GOTERM_CC_FAT	GO:0005913~cell-cell adherens junction	6	0.789474	0.00392799	ENSMUSG00000021782, ENSMUSG00000000303, ENSMUSG00000057738, ENSMUSG00000026782, ENSMUSG00000061048, ENSMUSG00000022656	434	31	12504	5.57633	0.765965	0.0638812	5.28057
GOTERM_CC_FAT	GO:0044430~cytoskeletal part	42	5.52632	0.00428613	ENSMUSG00000024269, ENSMUSG00000015222, ENSMUSG00000022629, ENSMUSG00000026790, ENSMUSG00000039298, ENSMUSG00000007617, ENSMUSG00000041444, ENSMUSG00000069135, ENSMUSG00000032232, ENSMUSG00000000708, ENSMUSG00000023004, ENSMUSG00000000486, ENSMUSG00000028059, ENSMUSG00000033952, ENSMUSG00000023022, ENSMUSG00000022995, ENSMUSG00000019820, ENSMUSG00000052566, ENSMUSG00000057738, ENSMUSG00000025758,…	434	774	12504	1.56339	0.795048	0.0665913	5.74893
GOTERM_CC_FAT	GO:0001740~Barr body	3	0.394737	0.0068532	ENSMUSG00000024054, ENSMUSG00000015937, ENSMUSG00000020086	434	4	12504	21.6083	0.920939	0.100333	9.04373
GOTERM_CC_FAT	GO:0015630~microtubule cytoskeleton	27	3.55263	0.00738891	ENSMUSG00000024269, ENSMUSG00000026915, ENSMUSG00000022629, ENSMUSG00000015222, ENSMUSG00000026790, ENSMUSG00000039298, ENSMUSG00000069135, ENSMUSG00000023004, ENSMUSG00000028059, ENSMUSG00000033952, ENSMUSG00000052566, ENSMUSG00000025758, ENSMUSG00000062380, ENSMUSG00000057113, ENSMUSG00000015937, ENSMUSG00000032479, ENSMUSG00000023015, ENSMUSG00000021068, ENSMUSG00000024277, ENSMUSG00000022678,…	434	450	12504	1.72866	0.935212	0.103687	9.71769
GOTERM_CC_FAT	GO:0005813~centrosome	13	1.71053	0.00972899	ENSMUSG00000026790, ENSMUSG00000015937, ENSMUSG00000039298, ENSMUSG00000052566, ENSMUSG00000025758, ENSMUSG00000020580, ENSMUSG00000069135, ENSMUSG00000021068, ENSMUSG00000021699, ENSMUSG00000022678, ENSMUSG00000063810, ENSMUSG00000024068, ENSMUSG00000057113	434	160	12504	2.3409	0.972883	0.129557	12.6077
GOTERM_CC_FAT	GO:0016604~nuclear body	12	1.57895	0.0103746	ENSMUSG00000040669, ENSMUSG00000020409, ENSMUSG00000040850, ENSMUSG00000001910, ENSMUSG00000020994, ENSMUSG00000030216, ENSMUSG00000027829, ENSMUSG00000022521, ENSMUSG00000050567, ENSMUSG00000026739, ENSMUSG00000022897, ENSMUSG00000057113	434	142	12504	2.43474	0.978682	0.132836	13.3898
GOTERM_CC_FAT	GO:0000790~nuclear chromatin	7	0.921053	0.0115174	ENSMUSG00000024054, ENSMUSG00000040669, ENSMUSG00000020661, ENSMUSG00000015937, ENSMUSG00000020086, ENSMUSG00000027478, ENSMUSG00000029836	434	55	12504	3.66686	0.986082	0.141582	14.7584
GOTERM_CC_FAT	GO:0042995~cell projection	31	4.07895	0.0162354	ENSMUSG00000031442, ENSMUSG00000025969, ENSMUSG00000061665, ENSMUSG00000015222, ENSMUSG00000026790, ENSMUSG00000009073, ENSMUSG00000041444, ENSMUSG00000039552, ENSMUSG00000028059, ENSMUSG00000066129, ENSMUSG00000025265, ENSMUSG00000022995, ENSMUSG00000019820, ENSMUSG00000060261, ENSMUSG00000047139, ENSMUSG00000022788, ENSMUSG00000062380, ENSMUSG00000066551, ENSMUSG00000048402, ENSMUSG00000032946,…	434	575	12504	1.55329	0.997619	0.188018	20.1986
GOTERM_CC_FAT	GO:0000805~X chromosome	3	0.394737	0.0163601	ENSMUSG00000024054, ENSMUSG00000015937, ENSMUSG00000020086	434	6	12504	14.4055	0.997727	0.183635	20.3379
GOTERM_CC_FAT	GO:0005911~cell-cell junction	13	1.71053	0.0172366	ENSMUSG00000021782, ENSMUSG00000047501, ENSMUSG00000026782, ENSMUSG00000032232, ENSMUSG00000023118, ENSMUSG00000061048, ENSMUSG00000028059, ENSMUSG00000022656, ENSMUSG00000000303, ENSMUSG00000020994, ENSMUSG00000057738, ENSMUSG00000023906, ENSMUSG00000040584	434	173	12504	2.16499	0.998364	0.186948	21.3109
GOTERM_CC_FAT	GO:0000228~nuclear chromosome	10	1.31579	0.0245967	ENSMUSG00000024054, ENSMUSG00000040669, ENSMUSG00000020661, ENSMUSG00000056758, ENSMUSG00000015937, ENSMUSG00000025925, ENSMUSG00000020086, ENSMUSG00000027478, ENSMUSG00000029836, ENSMUSG00000024974	434	121	12504	2.38108	0.999898	0.249621	29.0565
GOTERM_CC_FAT	GO:0070469~respiratory chain	7	0.921053	0.0246418	ENSMUSG00000064341, ENSMUSG00000064367, ENSMUSG00000044894, ENSMUSG00000030647, ENSMUSG00000064370, ENSMUSG00000064363, ENSMUSG00000064354	434	65	12504	3.10273	0.9999	0.243454	29.1017
GOTERM_CC_FAT	GO:0044454~nuclear chromosome part	9	1.18421	0.0263922	ENSMUSG00000024054, ENSMUSG00000040669, ENSMUSG00000020661, ENSMUSG00000015937, ENSMUSG00000025925, ENSMUSG00000020086, ENSMUSG00000027478, ENSMUSG00000029836, ENSMUSG00000024974	434	103	12504	2.51747	0.999948	0.251946	30.8355
GOTERM_CC_FAT	GO:0005829~cytosol	29	3.81579	0.0269409	ENSMUSG00000022040, ENSMUSG00000027347, ENSMUSG00000070348, ENSMUSG00000023004, ENSMUSG00000032562, ENSMUSG00000039197, ENSMUSG00000034024, ENSMUSG00000026753, ENSMUSG00000036499, ENSMUSG00000060499, ENSMUSG00000022601, ENSMUSG00000033396, ENSMUSG00000014932, ENSMUSG00000031765, ENSMUSG00000057113, ENSMUSG00000049044, ENSMUSG00000032946, ENSMUSG00000030793, ENSMUSG00000040850, ENSMUSG00000026782,…	434	549	12504	1.5219	0.999958	0.250186	31.371
GOTERM_CC_FAT	GO:0005815~microtubule organizing center	13	1.71053	0.0316518	ENSMUSG00000026790, ENSMUSG00000015937, ENSMUSG00000039298, ENSMUSG00000052566, ENSMUSG00000025758, ENSMUSG00000020580, ENSMUSG00000069135, ENSMUSG00000021068, ENSMUSG00000021699, ENSMUSG00000022678, ENSMUSG00000063810, ENSMUSG00000024068, ENSMUSG00000057113	434	189	12504	1.98171	0.999993	0.280844	35.8118
GOTERM_CC_FAT	GO:0001739~sex chromatin	4	0.526316	0.0345172	ENSMUSG00000024054, ENSMUSG00000040669, ENSMUSG00000015937, ENSMUSG00000020086	434	21	12504	5.48782	0.999998	0.295538	38.381
GOTERM_CC_FAT	GO:0016607~nuclear speck	8	1.05263	0.0363266	ENSMUSG00000020409, ENSMUSG00000040850, ENSMUSG00000020994, ENSMUSG00000030216, ENSMUSG00000027829, ENSMUSG00000050567, ENSMUSG00000022897, ENSMUSG00000057113	434	90	12504	2.56098	0.999999	0.301847	39.9538
GOTERM_CC_FAT	GO:0000775~chromosome, centromeric region	9	1.18421	0.0387543	ENSMUSG00000020661, ENSMUSG00000043909, ENSMUSG00000022521, ENSMUSG00000031004, ENSMUSG00000000708, ENSMUSG00000027478, ENSMUSG00000029836, ENSMUSG00000022678, ENSMUSG00000074476	434	111	12504	2.33603	1	0.312002	42.0057
GOTERM_CC_FAT	GO:0030864~cortical actin cytoskeleton	4	0.526316	0.0389695	ENSMUSG00000021061, ENSMUSG00000019820, ENSMUSG00000057738, ENSMUSG00000026532	434	22	12504	5.23837	1	0.306973	42.1844
GOTERM_CC_FAT	GO:0030175~filopodium	4	0.526316	0.0389695	ENSMUSG00000022995, ENSMUSG00000022788, ENSMUSG00000026782, ENSMUSG00000009073	434	22	12504	5.23837	1	0.306973	42.1844
GOTERM_CC_FAT	GO:0000803~sex chromosome	4	0.526316	0.0389695	ENSMUSG00000024054, ENSMUSG00000040669, ENSMUSG00000015937, ENSMUSG00000020086	434	22	12504	5.23837	1	0.306973	42.1844
GOTERM_CC_FAT	GO:0044448~cell cortex part	7	0.921053	0.0404544	ENSMUSG00000021061, ENSMUSG00000019820, ENSMUSG00000057738, ENSMUSG00000022099, ENSMUSG00000053799, ENSMUSG00000026532, ENSMUSG00000000486	434	73	12504	2.7627	1	0.310411	43.4037
GOTERM_CC_FAT	GO:0000922~spindle pole	4	0.526316	0.0436984	ENSMUSG00000020580, ENSMUSG00000022678, ENSMUSG00000033952, ENSMUSG00000024974	434	23	12504	5.01062	1	0.324676	45.9849
GOTERM_CC_FAT	GO:0043005~neuron projection	15	1.97368	0.0455951	ENSMUSG00000025969, ENSMUSG00000022055, ENSMUSG00000062901, ENSMUSG00000015222, ENSMUSG00000019820, ENSMUSG00000028657, ENSMUSG00000026782, ENSMUSG00000041444, ENSMUSG00000024008, ENSMUSG00000069601, ENSMUSG00000062380, ENSMUSG00000024501, ENSMUSG00000066551, ENSMUSG00000066129, ENSMUSG00000028059	434	245	12504	1.76394	1	0.329995	47.443
GOTERM_CC_FAT	GO:0043292~contractile fiber	8	1.05263	0.0465119	ENSMUSG00000060180, ENSMUSG00000007617, ENSMUSG00000057738, ENSMUSG00000032366, ENSMUSG00000000708, ENSMUSG00000068699, ENSMUSG00000026950, ENSMUSG00000022565	434	95	12504	2.42619	1	0.329297	48.1347
GOTERM_CC_FAT	GO:0045177~apical part of cell	10	1.31579	0.0467099	ENSMUSG00000000303, ENSMUSG00000029304, ENSMUSG00000045394, ENSMUSG00000026193, ENSMUSG00000018340, ENSMUSG00000038600, ENSMUSG00000041488, ENSMUSG00000032346, ENSMUSG00000027070, ENSMUSG00000040584	434	136	12504	2.11846	1	0.324469	48.283
GOTERM_CC_FAT	GO:0030017~sarcomere	7	0.921053	0.0586045	ENSMUSG00000060180, ENSMUSG00000007617, ENSMUSG00000057738, ENSMUSG00000032366, ENSMUSG00000000708, ENSMUSG00000068699, ENSMUSG00000026950	434	80	12504	2.52097	1	0.383963	56.5021
GOTERM_CC_FAT	GO:0030054~cell junction	24	3.15789	0.0601713	ENSMUSG00000021782, ENSMUSG00000047501, ENSMUSG00000032946, ENSMUSG00000007617, ENSMUSG00000009073, ENSMUSG00000026782, ENSMUSG00000041444, ENSMUSG00000032232, ENSMUSG00000023118, ENSMUSG00000061048, ENSMUSG00000028059, ENSMUSG00000022656, ENSMUSG00000023022, ENSMUSG00000000303, ENSMUSG00000022995, ENSMUSG00000019820, ENSMUSG00000020994, ENSMUSG00000062234, ENSMUSG00000057738, ENSMUSG00000039953,…	434	470	12504	1.4712	1	0.385667	57.4895
GOTERM_CC_FAT	GO:0030863~cortical cytoskeleton	5	0.657895	0.0606291	ENSMUSG00000021061, ENSMUSG00000019820, ENSMUSG00000057738, ENSMUSG00000022099, ENSMUSG00000026532	434	43	12504	3.35012	1	0.38172	57.774
GOTERM_CC_FAT	GO:0005681~spliceosome	9	1.18421	0.0661492	ENSMUSG00000022283, ENSMUSG00000020409, ENSMUSG00000028134, ENSMUSG00000020994, ENSMUSG00000021413, ENSMUSG00000032621, ENSMUSG00000038446, ENSMUSG00000061479, ENSMUSG00000046434	434	124	12504	2.09113	1	0.402729	61.0688
GOTERM_CC_FAT	GO:0030027~lamellipodium	6	0.789474	0.0666119	ENSMUSG00000031442, ENSMUSG00000022995, ENSMUSG00000022788, ENSMUSG00000026782, ENSMUSG00000009073, ENSMUSG00000025265	434	63	12504	2.74391	1	0.398744	61.3338
GOTERM_CC_FAT	GO:0042579~microbody	8	1.05263	0.0690724	ENSMUSG00000022040, ENSMUSG00000026664, ENSMUSG00000017453, ENSMUSG00000024601, ENSMUSG00000027359, ENSMUSG00000024981, ENSMUSG00000036257, ENSMUSG00000028127	434	104	12504	2.21624	1	0.404204	62.7154
GOTERM_CC_FAT	GO:0005777~peroxisome	8	1.05263	0.0690724	ENSMUSG00000022040, ENSMUSG00000026664, ENSMUSG00000017453, ENSMUSG00000024601, ENSMUSG00000027359, ENSMUSG00000024981, ENSMUSG00000036257, ENSMUSG00000028127	434	104	12504	2.21624	1	0.404204	62.7154
GOTERM_CC_FAT	GO:0005874~microtubule	14	1.84211	0.0741414	ENSMUSG00000024269, ENSMUSG00000015222, ENSMUSG00000022629, ENSMUSG00000026790, ENSMUSG00000032479, ENSMUSG00000021068, ENSMUSG00000024277, ENSMUSG00000023004, ENSMUSG00000022678, ENSMUSG00000028059, ENSMUSG00000052566, ENSMUSG00000027306, ENSMUSG00000062380, ENSMUSG00000024068	434	240	12504	1.68065	1	0.42111	65.4185
GOTERM_CC_FAT	GO:0005783~endoplasmic reticulum	38	5	0.0766129	ENSMUSG00000021072, ENSMUSG00000027347, ENSMUSG00000025260, ENSMUSG00000026675, ENSMUSG00000052488, ENSMUSG00000041444, ENSMUSG00000029330, ENSMUSG00000073678, ENSMUSG00000022125, ENSMUSG00000036257, ENSMUSG00000015013, ENSMUSG00000001467, ENSMUSG00000027861, ENSMUSG00000006800, ENSMUSG00000024981, ENSMUSG00000048040, ENSMUSG00000058793, ENSMUSG00000038007, ENSMUSG00000019970, ENSMUSG00000027359,…	434	838	12504	1.30647	1	0.425893	66.6695
GOTERM_CC_FAT	GO:0044449~contractile fiber part	7	0.921053	0.0774818	ENSMUSG00000060180, ENSMUSG00000007617, ENSMUSG00000057738, ENSMUSG00000032366, ENSMUSG00000000708, ENSMUSG00000068699, ENSMUSG00000026950	434	86	12504	2.34509	1	0.423682	67.0992
GOTERM_CC_FAT	GO:0000793~condensed chromosome	8	1.05263	0.0778269	ENSMUSG00000015937, ENSMUSG00000043909, ENSMUSG00000022521, ENSMUSG00000031004, ENSMUSG00000029836, ENSMUSG00000022678, ENSMUSG00000074476, ENSMUSG00000024974	434	107	12504	2.1541	1	0.419338	67.2685
GOTERM_CC_FAT	GO:0005819~spindle	8	1.05263	0.0840068	ENSMUSG00000020580, ENSMUSG00000023015, ENSMUSG00000022678, ENSMUSG00000027306, ENSMUSG00000033952, ENSMUSG00000028059, ENSMUSG00000024974, ENSMUSG00000024068	434	109	12504	2.11457	1	0.439085	70.1659
GOTERM_CC_FAT	GO:0016585~chromatin remodeling complex	5	0.657895	0.0940942	ENSMUSG00000007880, ENSMUSG00000031099, ENSMUSG00000035478, ENSMUSG00000000708, ENSMUSG00000021144	434	50	12504	2.88111	1	0.472565	74.3892
GOTERM_CC_FAT	GO:0030016~myofibril	7	0.921053	0.0955408	ENSMUSG00000060180, ENSMUSG00000007617, ENSMUSG00000057738, ENSMUSG00000032366, ENSMUSG00000000708, ENSMUSG00000068699, ENSMUSG00000026950	434	91	12504	2.21624	1	0.47211	74.9473
GOTERM_MF_FAT	GO:0003677~DNA binding	114	15	4.88013e-07	ENSMUSG00000033837, ENSMUSG00000029178, ENSMUSG00000025925, ENSMUSG00000026398, ENSMUSG00000020889, ENSMUSG00000061517, ENSMUSG00000021514, ENSMUSG00000055148, ENSMUSG00000060261, ENSMUSG00000021264, ENSMUSG00000048047, ENSMUSG00000028640, ENSMUSG00000037169, ENSMUSG00000030067, ENSMUSG00000016503, ENSMUSG00000071359, ENSMUSG00000020086, ENSMUSG00000070544, ENSMUSG00000059669, ENSMUSG00000029913,…	540	1781	13288	1.5751	0.000303498	0.000303498	0.000724307
GOTERM_MF_FAT	GO:0008270~zinc ion binding	124	16.3158	9.8538e-06	ENSMUSG00000029178, ENSMUSG00000043940, ENSMUSG00000026398, ENSMUSG00000026739, ENSMUSG00000020889, ENSMUSG00000028059, ENSMUSG00000019823, ENSMUSG00000046949, ENSMUSG00000021514, ENSMUSG00000023022, ENSMUSG00000055148, ENSMUSG00000019820, ENSMUSG00000022788, ENSMUSG00000021264, ENSMUSG00000048047, ENSMUSG00000078502, ENSMUSG00000030067, ENSMUSG00000016503, ENSMUSG00000020409, ENSMUSG00000025979,…	540	2105	13288	1.44956	0.00611035	0.00305986	0.014624
GOTERM_MF_FAT	GO:0003682~chromatin binding	18	2.36842	0.000183673	ENSMUSG00000020661, ENSMUSG00000015937, ENSMUSG00000025246, ENSMUSG00000035158, ENSMUSG00000035478, ENSMUSG00000026739, ENSMUSG00000074637, ENSMUSG00000040669, ENSMUSG00000041235, ENSMUSG00000056608, ENSMUSG00000031099, ENSMUSG00000022521, ENSMUSG00000005045, ENSMUSG00000057133, ENSMUSG00000029836, ENSMUSG00000059288, ENSMUSG00000030067, ENSMUSG00000048402	540	155	13288	2.85763	0.10797	0.0373689	0.272262
GOTERM_MF_FAT	GO:0046914~transition metal ion binding	139	18.2895	0.000331068	ENSMUSG00000029178, ENSMUSG00000043940, ENSMUSG00000026398, ENSMUSG00000026739, ENSMUSG00000001467, ENSMUSG00000020889, ENSMUSG00000028059, ENSMUSG00000019823, ENSMUSG00000046949, ENSMUSG00000021514, ENSMUSG00000023022, ENSMUSG00000055148, ENSMUSG00000019820, ENSMUSG00000022788, ENSMUSG00000021264, ENSMUSG00000048047, ENSMUSG00000078502, ENSMUSG00000030067, ENSMUSG00000016503, ENSMUSG00000020409,…	540	2608	13288	1.31151	0.186133	0.0501865	0.490247
GOTERM_MF_FAT	GO:0003723~RNA binding	46	6.05263	0.000639753	ENSMUSG00000027201, ENSMUSG00000033581, ENSMUSG00000062078, ENSMUSG00000026915, ENSMUSG00000027677, ENSMUSG00000040296, ENSMUSG00000052488, ENSMUSG00000040728, ENSMUSG00000028034, ENSMUSG00000021662, ENSMUSG00000044149, ENSMUSG00000032346, ENSMUSG00000031586, ENSMUSG00000023495, ENSMUSG00000022283, ENSMUSG00000028180, ENSMUSG00000028134, ENSMUSG00000000568, ENSMUSG00000038069, ENSMUSG00000000948,…	540	672	13288	1.68444	0.328374	0.0765243	0.94533
GOTERM_MF_FAT	GO:0008092~cytoskeletal protein binding	32	4.21053	0.000758162	ENSMUSG00000021782, ENSMUSG00000015222, ENSMUSG00000009073, ENSMUSG00000025085, ENSMUSG00000028059, ENSMUSG00000023022, ENSMUSG00000079523, ENSMUSG00000022995, ENSMUSG00000019820, ENSMUSG00000052566, ENSMUSG00000022788, ENSMUSG00000057738, ENSMUSG00000019978, ENSMUSG00000032366, ENSMUSG00000015804, ENSMUSG00000026532, ENSMUSG00000027238, ENSMUSG00000022565, ENSMUSG00000060180, ENSMUSG00000021061,…	540	414	13288	1.90202	0.376094	0.0756144	1.11938
GOTERM_MF_FAT	GO:0030695~GTPase regulator activity	29	3.81579	0.000796892	ENSMUSG00000031442, ENSMUSG00000078185, ENSMUSG00000027347, ENSMUSG00000041444, ENSMUSG00000044447, ENSMUSG00000021662, ENSMUSG00000066129, ENSMUSG00000028059, ENSMUSG00000025265, ENSMUSG00000020817, ENSMUSG00000022788, ENSMUSG00000026594, ENSMUSG00000030257, ENSMUSG00000035697, ENSMUSG00000026074, ENSMUSG00000031139, ENSMUSG00000078954, ENSMUSG00000049044, ENSMUSG00000032946, ENSMUSG00000039713,…	540	361	13288	1.97677	0.390956	0.068387	1.17625
GOTERM_MF_FAT	GO:0005085~guanyl-nucleotide exchange factor activity	16	2.10526	0.000926356	ENSMUSG00000032946, ENSMUSG00000031442, ENSMUSG00000039713, ENSMUSG00000027347, ENSMUSG00000017631, ENSMUSG00000020640, ENSMUSG00000044447, ENSMUSG00000021662, ENSMUSG00000028059, ENSMUSG00000066129, ENSMUSG00000025265, ENSMUSG00000022788, ENSMUSG00000026594, ENSMUSG00000021895, ENSMUSG00000031139, ENSMUSG00000049044	540	147	13288	2.67836	0.438116	0.0695226	1.36612
GOTERM_MF_FAT	GO:0060589~nucleoside-triphosphatase regulator activity	29	3.81579	0.00101647	ENSMUSG00000031442, ENSMUSG00000078185, ENSMUSG00000027347, ENSMUSG00000041444, ENSMUSG00000044447, ENSMUSG00000021662, ENSMUSG00000066129, ENSMUSG00000028059, ENSMUSG00000025265, ENSMUSG00000020817, ENSMUSG00000022788, ENSMUSG00000026594, ENSMUSG00000030257, ENSMUSG00000035697, ENSMUSG00000026074, ENSMUSG00000031139, ENSMUSG00000078954, ENSMUSG00000049044, ENSMUSG00000032946, ENSMUSG00000039713,…	540	367	13288	1.94445	0.468774	0.0678722	1.49808
GOTERM_MF_FAT	GO:0043169~cation binding	190	25	0.00161351	ENSMUSG00000029178, ENSMUSG00000060126, ENSMUSG00000043940, ENSMUSG00000026398, ENSMUSG00000026739, ENSMUSG00000001467, ENSMUSG00000020889, ENSMUSG00000054662, ENSMUSG00000028059, ENSMUSG00000021514, ENSMUSG00000019823, ENSMUSG00000046949, ENSMUSG00000023022, ENSMUSG00000055148, ENSMUSG00000019820, ENSMUSG00000027861, ENSMUSG00000014773, ENSMUSG00000022788, ENSMUSG00000021264, ENSMUSG00000048047,…	540	3885	13288	1.20345	0.633741	0.095562	2.36822
GOTERM_MF_FAT	GO:0005088~Ras guanyl-nucleotide exchange factor activity	11	1.44737	0.00188455	ENSMUSG00000031442, ENSMUSG00000039713, ENSMUSG00000017631, ENSMUSG00000022788, ENSMUSG00000020640, ENSMUSG00000021662, ENSMUSG00000021895, ENSMUSG00000028059, ENSMUSG00000066129, ENSMUSG00000031139, ENSMUSG00000025265	540	83	13288	3.26122	0.690653	0.101171	2.76086
GOTERM_MF_FAT	GO:0005089~Rho guanyl-nucleotide exchange factor activity	10	1.31579	0.00220329	ENSMUSG00000031442, ENSMUSG00000039713, ENSMUSG00000017631, ENSMUSG00000022788, ENSMUSG00000020640, ENSMUSG00000021662, ENSMUSG00000021895, ENSMUSG00000028059, ENSMUSG00000031139, ENSMUSG00000025265	540	71	13288	3.46583	0.74639	0.108036	3.22073
GOTERM_MF_FAT	GO:0019992~diacylglycerol binding	9	1.18421	0.00249251	ENSMUSG00000032946, ENSMUSG00000027347, ENSMUSG00000020580, ENSMUSG00000025357, ENSMUSG00000023015, ENSMUSG00000021662, ENSMUSG00000035697, ENSMUSG00000026490, ENSMUSG00000028059	540	59	13288	3.75367	0.788235	0.112553	3.63625
GOTERM_MF_FAT	GO:0046872~metal ion binding	187	24.6053	0.00252479	ENSMUSG00000029178, ENSMUSG00000060126, ENSMUSG00000043940, ENSMUSG00000026398, ENSMUSG00000026739, ENSMUSG00000001467, ENSMUSG00000020889, ENSMUSG00000054662, ENSMUSG00000028059, ENSMUSG00000021514, ENSMUSG00000019823, ENSMUSG00000046949, ENSMUSG00000023022, ENSMUSG00000055148, ENSMUSG00000019820, ENSMUSG00000027861, ENSMUSG00000014773, ENSMUSG00000022788, ENSMUSG00000021264, ENSMUSG00000048047,…	540	3850	13288	1.19522	0.792455	0.106237	3.68252
GOTERM_MF_FAT	GO:0043167~ion binding	190	25	0.00298137	ENSMUSG00000029178, ENSMUSG00000060126, ENSMUSG00000043940, ENSMUSG00000026398, ENSMUSG00000026739, ENSMUSG00000001467, ENSMUSG00000020889, ENSMUSG00000054662, ENSMUSG00000028059, ENSMUSG00000021514, ENSMUSG00000019823, ENSMUSG00000046949, ENSMUSG00000023022, ENSMUSG00000055148, ENSMUSG00000019820, ENSMUSG00000027861, ENSMUSG00000014773, ENSMUSG00000022788, ENSMUSG00000021264, ENSMUSG00000048047,…	540	3934	13288	1.18846	0.843888	0.116454	4.3348
GOTERM_MF_FAT	GO:0005545~phosphatidylinositol binding	4	0.526316	0.00319011	ENSMUSG00000031442, ENSMUSG00000039361, ENSMUSG00000043940, ENSMUSG00000036499	540	8	13288	12.3037	0.862951	0.116809	4.63164
GOTERM_MF_FAT	GO:0008289~lipid binding	26	3.42105	0.00367707	ENSMUSG00000032946, ENSMUSG00000031442, ENSMUSG00000027347, ENSMUSG00000039361, ENSMUSG00000043940, ENSMUSG00000041444, ENSMUSG00000026398, ENSMUSG00000018340, ENSMUSG00000023015, ENSMUSG00000021662, ENSMUSG00000042644, ENSMUSG00000074643, ENSMUSG00000002985, ENSMUSG00000026490, ENSMUSG00000028059, ENSMUSG00000028488, ENSMUSG00000038301, ENSMUSG00000021466, ENSMUSG00000028773, ENSMUSG00000049929,…	540	345	13288	1.85447	0.89887	0.126097	5.32079
GOTERM_MF_FAT	GO:0042623~ATPase activity, coupled	19	2.5	0.00427064	ENSMUSG00000020228, ENSMUSG00000040296, ENSMUSG00000007107, ENSMUSG00000041415, ENSMUSG00000038774, ENSMUSG00000004285, ENSMUSG00000041235, ENSMUSG00000032849, ENSMUSG00000005045, ENSMUSG00000031099, ENSMUSG00000069045, ENSMUSG00000028127, ENSMUSG00000057133, ENSMUSG00000038600, ENSMUSG00000039224, ENSMUSG00000025324, ENSMUSG00000040584, ENSMUSG00000021114, ENSMUSG00000024068	540	223	13288	2.0966	0.930193	0.137474	6.15452
GOTERM_MF_FAT	GO:0017124~SH3 domain binding	10	1.31579	0.00457872	ENSMUSG00000019823, ENSMUSG00000062078, ENSMUSG00000061665, ENSMUSG00000022995, ENSMUSG00000039361, ENSMUSG00000041112, ENSMUSG00000029603, ENSMUSG00000011256, ENSMUSG00000027070, ENSMUSG00000022353	540	79	13288	3.11486	0.942416	0.139496	6.58456
GOTERM_MF_FAT	GO:0016887~ATPase activity	22	2.89474	0.00525885	ENSMUSG00000030213, ENSMUSG00000020228, ENSMUSG00000040296, ENSMUSG00000007107, ENSMUSG00000041415, ENSMUSG00000038774, ENSMUSG00000004285, ENSMUSG00000022360, ENSMUSG00000041235, ENSMUSG00000032849, ENSMUSG00000024030, ENSMUSG00000005045, ENSMUSG00000031099, ENSMUSG00000069045, ENSMUSG00000028127, ENSMUSG00000057133, ENSMUSG00000038600, ENSMUSG00000039224, ENSMUSG00000025324, ENSMUSG00000040584,…	540	281	13288	1.92656	0.962358	0.151242	7.52741
GOTERM_MF_FAT	GO:0000166~nucleotide binding	112	14.7368	0.00537733	ENSMUSG00000033581, ENSMUSG00000032307, ENSMUSG00000031586, ENSMUSG00000000486, ENSMUSG00000031584, ENSMUSG00000022781, ENSMUSG00000024054, ENSMUSG00000031256, ENSMUSG00000062380, ENSMUSG00000027452, ENSMUSG00000019970, ENSMUSG00000049044, ENSMUSG00000069793, ENSMUSG00000030265, ENSMUSG00000021068, ENSMUSG00000032849, ENSMUSG00000062234, ENSMUSG00000070544, ENSMUSG00000020580, ENSMUSG00000020680,…	540	2183	13288	1.2625	0.965046	0.147602	7.69075
GOTERM_MF_FAT	GO:0004386~helicase activity	13	1.71053	0.00617038	ENSMUSG00000041235, ENSMUSG00000020228, ENSMUSG00000056608, ENSMUSG00000040296, ENSMUSG00000005045, ENSMUSG00000031099, ENSMUSG00000069045, ENSMUSG00000041415, ENSMUSG00000057133, ENSMUSG00000030986, ENSMUSG00000038774, ENSMUSG00000039224, ENSMUSG00000036086	540	129	13288	2.47982	0.978717	0.160538	8.77713
GOTERM_MF_FAT	GO:0042162~telomeric DNA binding	4	0.526316	0.00858163	ENSMUSG00000026234, ENSMUSG00000000568, ENSMUSG00000025925, ENSMUSG00000043909	540	11	13288	8.94815	0.995303	0.207909	12.0075
GOTERM_MF_FAT	GO:0003725~double-stranded RNA binding	6	0.789474	0.0113302	ENSMUSG00000026915, ENSMUSG00000022191, ENSMUSG00000038069, ENSMUSG00000041415, ENSMUSG00000044149, ENSMUSG00000032178	540	34	13288	4.34248	0.999165	0.255705	15.5595
GOTERM_MF_FAT	GO:0032559~adenyl ribonucleotide binding	77	10.1316	0.0130093	ENSMUSG00000032307, ENSMUSG00000032113, ENSMUSG00000032936, ENSMUSG00000020228, ENSMUSG00000031155, ENSMUSG00000021413, ENSMUSG00000022781, ENSMUSG00000024054, ENSMUSG00000022360, ENSMUSG00000025758, ENSMUSG00000027298, ENSMUSG00000030986, ENSMUSG00000060090, ENSMUSG00000027452, ENSMUSG00000040584, ENSMUSG00000019970, ENSMUSG00000049044, ENSMUSG00000069793, ENSMUSG00000027359, ENSMUSG00000036086,…	540	1460	13288	1.29779	0.99971	0.278047	17.6631
GOTERM_MF_FAT	GO:0005524~ATP binding	76	10	0.0140636	ENSMUSG00000032307, ENSMUSG00000032113, ENSMUSG00000032936, ENSMUSG00000020228, ENSMUSG00000031155, ENSMUSG00000021413, ENSMUSG00000022781, ENSMUSG00000024054, ENSMUSG00000022360, ENSMUSG00000025758, ENSMUSG00000027298, ENSMUSG00000030986, ENSMUSG00000060090, ENSMUSG00000027452, ENSMUSG00000040584, ENSMUSG00000019970, ENSMUSG00000069793, ENSMUSG00000027359, ENSMUSG00000036086, ENSMUSG00000041235,…	540	1443	13288	1.29602	0.999851	0.287398	18.9589
GOTERM_MF_FAT	GO:0030554~adenyl nucleotide binding	79	10.3947	0.0200355	ENSMUSG00000032307, ENSMUSG00000032113, ENSMUSG00000032936, ENSMUSG00000020228, ENSMUSG00000031155, ENSMUSG00000021413, ENSMUSG00000031584, ENSMUSG00000022781, ENSMUSG00000024054, ENSMUSG00000022360, ENSMUSG00000025758, ENSMUSG00000027298, ENSMUSG00000030986, ENSMUSG00000060090, ENSMUSG00000027452, ENSMUSG00000040584, ENSMUSG00000019970, ENSMUSG00000049044, ENSMUSG00000069793, ENSMUSG00000027359,…	540	1535	13288	1.26644	0.999997	0.372646	25.9468
GOTERM_MF_FAT	GO:0001882~nucleoside binding	80	10.5263	0.0202271	ENSMUSG00000032307, ENSMUSG00000032113, ENSMUSG00000032936, ENSMUSG00000020228, ENSMUSG00000031155, ENSMUSG00000021413, ENSMUSG00000031584, ENSMUSG00000022781, ENSMUSG00000024054, ENSMUSG00000022360, ENSMUSG00000025758, ENSMUSG00000027298, ENSMUSG00000030986, ENSMUSG00000060090, ENSMUSG00000027452, ENSMUSG00000040584, ENSMUSG00000019970, ENSMUSG00000049044, ENSMUSG00000069793, ENSMUSG00000027359,…	540	1558	13288	1.26354	0.999997	0.364878	26.1615
GOTERM_MF_FAT	GO:0003785~actin monomer binding	3	0.394737	0.0220989	ENSMUSG00000079523, ENSMUSG00000023022, ENSMUSG00000022353	540	6	13288	12.3037	0.999999	0.380783	28.2276
GOTERM_MF_FAT	GO:0070035~purine NTP-dependent helicase activity	9	1.18421	0.0231726	ENSMUSG00000041235, ENSMUSG00000020228, ENSMUSG00000040296, ENSMUSG00000005045, ENSMUSG00000069045, ENSMUSG00000041415, ENSMUSG00000057133, ENSMUSG00000038774, ENSMUSG00000039224	540	86	13288	2.57519	1	0.384979	29.3884
GOTERM_MF_FAT	GO:0008026~ATP-dependent helicase activity	9	1.18421	0.0231726	ENSMUSG00000041235, ENSMUSG00000020228, ENSMUSG00000040296, ENSMUSG00000005045, ENSMUSG00000069045, ENSMUSG00000041415, ENSMUSG00000057133, ENSMUSG00000038774, ENSMUSG00000039224	540	86	13288	2.57519	1	0.384979	29.3884
GOTERM_MF_FAT	GO:0001883~purine nucleoside binding	79	10.3947	0.0245527	ENSMUSG00000032307, ENSMUSG00000032113, ENSMUSG00000032936, ENSMUSG00000020228, ENSMUSG00000031155, ENSMUSG00000021413, ENSMUSG00000031584, ENSMUSG00000022781, ENSMUSG00000024054, ENSMUSG00000022360, ENSMUSG00000025758, ENSMUSG00000027298, ENSMUSG00000030986, ENSMUSG00000060090, ENSMUSG00000027452, ENSMUSG00000040584, ENSMUSG00000019970, ENSMUSG00000049044, ENSMUSG00000069793, ENSMUSG00000027359,…	540	1548	13288	1.2558	1	0.392733	30.8547
GOTERM_MF_FAT	GO:0019904~protein domain specific binding	15	1.97368	0.0246705	ENSMUSG00000030793, ENSMUSG00000062078, ENSMUSG00000061665, ENSMUSG00000039361, ENSMUSG00000025223, ENSMUSG00000029603, ENSMUSG00000027070, ENSMUSG00000019823, ENSMUSG00000022995, ENSMUSG00000041112, ENSMUSG00000019978, ENSMUSG00000021270, ENSMUSG00000011256, ENSMUSG00000022353, ENSMUSG00000013663	540	192	13288	1.92245	1	0.384639	30.9785
GOTERM_MF_FAT	GO:0008047~enzyme activator activity	18	2.36842	0.0252138	ENSMUSG00000030793, ENSMUSG00000078185, ENSMUSG00000031709, ENSMUSG00000017631, ENSMUSG00000041444, ENSMUSG00000023015, ENSMUSG00000020427, ENSMUSG00000002985, ENSMUSG00000041219, ENSMUSG00000020817, ENSMUSG00000047139, ENSMUSG00000026193, ENSMUSG00000020130, ENSMUSG00000030257, ENSMUSG00000026721, ENSMUSG00000035697, ENSMUSG00000066551, ENSMUSG00000078954	540	249	13288	1.77885	1	0.382043	31.547
GOTERM_MF_FAT	GO:0015631~tubulin binding	8	1.05263	0.0341555	ENSMUSG00000052566, ENSMUSG00000040549, ENSMUSG00000023015, ENSMUSG00000024277, ENSMUSG00000022678, ENSMUSG00000027306, ENSMUSG00000028059, ENSMUSG00000024068	540	76	13288	2.59025	1	0.47047	40.2975
GOTERM_MF_FAT	GO:0008017~microtubule binding	7	0.921053	0.0365889	ENSMUSG00000052566, ENSMUSG00000040549, ENSMUSG00000024277, ENSMUSG00000022678, ENSMUSG00000027306, ENSMUSG00000028059, ENSMUSG00000024068	540	61	13288	2.8238	1	0.484404	42.4915
GOTERM_MF_FAT	GO:0005083~small GTPase regulator activity	16	2.10526	0.0378592	ENSMUSG00000031442, ENSMUSG00000039713, ENSMUSG00000031709, ENSMUSG00000017631, ENSMUSG00000020640, ENSMUSG00000021662, ENSMUSG00000026490, ENSMUSG00000028059, ENSMUSG00000066129, ENSMUSG00000025265, ENSMUSG00000022788, ENSMUSG00000020130, ENSMUSG00000026721, ENSMUSG00000026074, ENSMUSG00000021895, ENSMUSG00000031139	540	223	13288	1.76555	1	0.486665	43.6067
GOTERM_MF_FAT	GO:0032555~purine ribonucleotide binding	88	11.5789	0.0422371	ENSMUSG00000032307, ENSMUSG00000032113, ENSMUSG00000032936, ENSMUSG00000020228, ENSMUSG00000021413, ENSMUSG00000031155, ENSMUSG00000000486, ENSMUSG00000031160, ENSMUSG00000022781, ENSMUSG00000024054, ENSMUSG00000022360, ENSMUSG00000025758, ENSMUSG00000027298, ENSMUSG00000030986, ENSMUSG00000060090, ENSMUSG00000027452, ENSMUSG00000062380, ENSMUSG00000022911, ENSMUSG00000040584, ENSMUSG00000019970,…	540	1796	13288	1.20571	1	0.515903	47.2975
GOTERM_MF_FAT	GO:0032553~ribonucleotide binding	88	11.5789	0.0422371	ENSMUSG00000032307, ENSMUSG00000032113, ENSMUSG00000032936, ENSMUSG00000020228, ENSMUSG00000021413, ENSMUSG00000031155, ENSMUSG00000000486, ENSMUSG00000031160, ENSMUSG00000022781, ENSMUSG00000024054, ENSMUSG00000022360, ENSMUSG00000025758, ENSMUSG00000027298, ENSMUSG00000030986, ENSMUSG00000060090, ENSMUSG00000027452, ENSMUSG00000062380, ENSMUSG00000022911, ENSMUSG00000040584, ENSMUSG00000019970,…	540	1796	13288	1.20571	1	0.515903	47.2975
GOTERM_MF_FAT	GO:0004402~histone acetyltransferase activity	4	0.526316	0.0452867	ENSMUSG00000031540, ENSMUSG00000022521, ENSMUSG00000000708, ENSMUSG00000059288	540	20	13288	4.92148	1	0.53167	49.734
GOTERM_MF_FAT	GO:0008013~beta-catenin binding	4	0.526316	0.0452867	ENSMUSG00000021782, ENSMUSG00000055799, ENSMUSG00000000303, ENSMUSG00000061665	540	20	13288	4.92148	1	0.53167	49.734
GOTERM_MF_FAT	GO:0004468~lysine N-acetyltransferase activity	4	0.526316	0.0452867	ENSMUSG00000031540, ENSMUSG00000022521, ENSMUSG00000000708, ENSMUSG00000059288	540	20	13288	4.92148	1	0.53167	49.734
GOTERM_MF_FAT	GO:0008134~transcription factor binding	19	2.5	0.0458847	ENSMUSG00000056216, ENSMUSG00000030213, ENSMUSG00000040363, ENSMUSG00000043962, ENSMUSG00000068284, ENSMUSG00000025223, ENSMUSG00000050567, ENSMUSG00000025246, ENSMUSG00000000708, ENSMUSG00000028224, ENSMUSG00000027630, ENSMUSG00000000861, ENSMUSG00000043909, ENSMUSG00000031540, ENSMUSG00000007029, ENSMUSG00000023026, ENSMUSG00000022521, ENSMUSG00000036940, ENSMUSG00000057113	540	288	13288	1.62341	1	0.527219	50.1993
GOTERM_MF_FAT	GO:0003779~actin binding	19	2.5	0.0458847	ENSMUSG00000060180, ENSMUSG00000021061, ENSMUSG00000024533, ENSMUSG00000025085, ENSMUSG00000023022, ENSMUSG00000079523, ENSMUSG00000022995, ENSMUSG00000019820, ENSMUSG00000022788, ENSMUSG00000057738, ENSMUSG00000019978, ENSMUSG00000005103, ENSMUSG00000032366, ENSMUSG00000022099, ENSMUSG00000015804, ENSMUSG00000026532, ENSMUSG00000068699, ENSMUSG00000022353, ENSMUSG00000022565	540	288	13288	1.62341	1	0.527219	50.1993
GOTERM_MF_FAT	GO:0042802~identical protein binding	19	2.5	0.0485351	ENSMUSG00000030793, ENSMUSG00000047501, ENSMUSG00000056216, ENSMUSG00000025223, ENSMUSG00000021754, ENSMUSG00000022678, ENSMUSG00000022656, ENSMUSG00000039193, ENSMUSG00000001930, ENSMUSG00000030101, ENSMUSG00000021665, ENSMUSG00000024827, ENSMUSG00000027777, ENSMUSG00000021270, ENSMUSG00000024594, ENSMUSG00000023906, ENSMUSG00000030168, ENSMUSG00000027506, ENSMUSG00000030067	540	290	13288	1.61221	1	0.538675	52.2135
GOTERM_MF_FAT	GO:0008201~heparin binding	8	1.05263	0.0511502	ENSMUSG00000029103, ENSMUSG00000021466, ENSMUSG00000023885, ENSMUSG00000026193, ENSMUSG00000048758, ENSMUSG00000002985, ENSMUSG00000027239, ENSMUSG00000066551	540	83	13288	2.3718	1	0.549112	54.1262
GOTERM_MF_FAT	GO:0005543~phospholipid binding	10	1.31579	0.052745	ENSMUSG00000031442, ENSMUSG00000038301, ENSMUSG00000039361, ENSMUSG00000043940, ENSMUSG00000018340, ENSMUSG00000041444, ENSMUSG00000025357, ENSMUSG00000036499, ENSMUSG00000042644, ENSMUSG00000074643	540	119	13288	2.06785	1	0.551785	55.2574
GOTERM_MF_FAT	GO:0030528~transcription regulator activity	61	8.02632	0.0557329	ENSMUSG00000027552, ENSMUSG00000033837, ENSMUSG00000030213, ENSMUSG00000026398, ENSMUSG00000025246, ENSMUSG00000000708, ENSMUSG00000026739, ENSMUSG00000020889, ENSMUSG00000029131, ENSMUSG00000061517, ENSMUSG00000021514, ENSMUSG00000005718, ENSMUSG00000055148, ENSMUSG00000031540, ENSMUSG00000021264, ENSMUSG00000028640, ENSMUSG00000037169, ENSMUSG00000001604, ENSMUSG00000031601, ENSMUSG00000048402,…	540	1206	13288	1.24465	1	0.563741	57.3069
GOTERM_MF_FAT	GO:0017076~purine nucleotide binding	90	11.8421	0.0568773	ENSMUSG00000032307, ENSMUSG00000032113, ENSMUSG00000032936, ENSMUSG00000020228, ENSMUSG00000021413, ENSMUSG00000031155, ENSMUSG00000000486, ENSMUSG00000031160, ENSMUSG00000031584, ENSMUSG00000022781, ENSMUSG00000024054, ENSMUSG00000022360, ENSMUSG00000025758, ENSMUSG00000027298, ENSMUSG00000030986, ENSMUSG00000060090, ENSMUSG00000027452, ENSMUSG00000062380, ENSMUSG00000022911, ENSMUSG00000040584,…	540	1871	13288	1.18368	1	0.562995	58.0685
GOTERM_MF_FAT	GO:0003954~NADH dehydrogenase activity	4	0.526316	0.0714585	ENSMUSG00000064341, ENSMUSG00000064367, ENSMUSG00000030647, ENSMUSG00000064363	540	24	13288	4.10123	1	0.641125	66.7259
GOTERM_MF_FAT	GO:0050136~NADH dehydrogenase (quinone) activity	4	0.526316	0.0714585	ENSMUSG00000064341, ENSMUSG00000064367, ENSMUSG00000030647, ENSMUSG00000064363	540	24	13288	4.10123	1	0.641125	66.7259
GOTERM_MF_FAT	GO:0008137~NADH dehydrogenase (ubiquinone) activity	4	0.526316	0.0714585	ENSMUSG00000064341, ENSMUSG00000064367, ENSMUSG00000030647, ENSMUSG00000064363	540	24	13288	4.10123	1	0.641125	66.7259
GOTERM_MF_FAT	GO:0030247~polysaccharide binding	10	1.31579	0.0761403	ENSMUSG00000006342, ENSMUSG00000029103, ENSMUSG00000021466, ENSMUSG00000023885, ENSMUSG00000026193, ENSMUSG00000048758, ENSMUSG00000021614, ENSMUSG00000002985, ENSMUSG00000027239, ENSMUSG00000066551	540	128	13288	1.92245	1	0.657285	69.1309
GOTERM_MF_FAT	GO:0001871~pattern binding	10	1.31579	0.0761403	ENSMUSG00000006342, ENSMUSG00000029103, ENSMUSG00000021466, ENSMUSG00000023885, ENSMUSG00000026193, ENSMUSG00000048758, ENSMUSG00000021614, ENSMUSG00000002985, ENSMUSG00000027239, ENSMUSG00000066551	540	128	13288	1.92245	1	0.657285	69.1309
GOTERM_MF_FAT	GO:0004605~phosphatidate cytidylyltransferase activity	2	0.263158	0.0794834	ENSMUSG00000029330, ENSMUSG00000058793	540	2	13288	24.6074	1	0.66581	70.7479
GOTERM_MF_FAT	GO:0005315~inorganic phosphate transmembrane transporter activity	2	0.263158	0.0794834	ENSMUSG00000027397, ENSMUSG00000037656	540	2	13288	24.6074	1	0.66581	70.7479
GOTERM_MF_FAT	GO:0035091~phosphoinositide binding	7	0.921053	0.0834368	ENSMUSG00000031442, ENSMUSG00000038301, ENSMUSG00000039361, ENSMUSG00000043940, ENSMUSG00000041444, ENSMUSG00000036499, ENSMUSG00000042644	540	75	13288	2.29669	1	0.676639	72.5581
GOTERM_MF_FAT	GO:0016564~transcription repressor activity	14	1.84211	0.0884083	ENSMUSG00000030213, ENSMUSG00000001910, ENSMUSG00000040363, ENSMUSG00000068284, ENSMUSG00000037608, ENSMUSG00000025246, ENSMUSG00000029913, ENSMUSG00000029836, ENSMUSG00000026739, ENSMUSG00000036940, ENSMUSG00000029131, ENSMUSG00000027630, ENSMUSG00000030067, ENSMUSG00000000861	540	211	13288	1.63272	1	0.691176	74.6863
GOTERM_MF_FAT	GO:0031072~heat shock protein binding	6	0.789474	0.0903806	ENSMUSG00000029014, ENSMUSG00000054405, ENSMUSG00000062234, ENSMUSG00000040697, ENSMUSG00000031701, ENSMUSG00000029131	540	59	13288	2.50245	1	0.692238	75.4871
GOTERM_MF_FAT	GO:0005539~glycosaminoglycan binding	9	1.18421	0.0919182	ENSMUSG00000029103, ENSMUSG00000021466, ENSMUSG00000023885, ENSMUSG00000026193, ENSMUSG00000048758, ENSMUSG00000021614, ENSMUSG00000002985, ENSMUSG00000027239, ENSMUSG00000066551	540	114	13288	1.94269	1	0.691476	76.0949
GOTERM_MF_FAT	GO:0042803~protein homodimerization activity	13	1.71053	0.0939509	ENSMUSG00000030793, ENSMUSG00000039193, ENSMUSG00000056216, ENSMUSG00000001930, ENSMUSG00000030101, ENSMUSG00000025223, ENSMUSG00000021665, ENSMUSG00000024827, ENSMUSG00000027777, ENSMUSG00000021270, ENSMUSG00000027506, ENSMUSG00000030067, ENSMUSG00000022656	540	193	13288	1.65749	1	0.692766	76.8769
GOTERM_MF_FAT	GO:0016655~oxidoreductase activity, acting on NADH or NADPH, quinone or similar compound as acceptor	4	0.526316	0.0945976	ENSMUSG00000064341, ENSMUSG00000064367, ENSMUSG00000030647, ENSMUSG00000064363	540	27	13288	3.64554	1	0.68847	77.1207
GOTERM_MF_FAT	GO:0042626~ATPase activity, coupled to transmembrane movement of substances	8	1.05263	0.0988705	ENSMUSG00000032849, ENSMUSG00000007107, ENSMUSG00000028127, ENSMUSG00000038600, ENSMUSG00000004285, ENSMUSG00000021114, ENSMUSG00000025324, ENSMUSG00000040584	540	97	13288	2.02948	1	0.69855	78.672
GOTERM_MF_FAT	GO:0043492~ATPase activity, coupled to movement of substances	8	1.05263	0.0988705	ENSMUSG00000032849, ENSMUSG00000007107, ENSMUSG00000028127, ENSMUSG00000038600, ENSMUSG00000004285, ENSMUSG00000021114, ENSMUSG00000025324, ENSMUSG00000040584	540	97	13288	2.02948	1	0.69855	78.672
GOTERM_MF_FAT	GO:0016820~hydrolase activity, acting on acid anhydrides, catalyzing transmembrane movement of substances	8	1.05263	0.0988705	ENSMUSG00000032849, ENSMUSG00000007107, ENSMUSG00000028127, ENSMUSG00000038600, ENSMUSG00000004285, ENSMUSG00000021114, ENSMUSG00000025324, ENSMUSG00000040584	540	97	13288	2.02948	1	0.69855	78.672
