# Supplementary material for: PHF13 is a molecular reader and transcriptional co-regulator of H3K4me2/3
Source: eLife. 2016 May 25;5:e10607. doi: 10.7554/eLife.10607 (PMC4915813; doi:10.7554/eLife.10607)
Supplement: Figure 6—source data 5. — DOI: http://dx.doi.org/10.7554/eLife.10607.024 [file elife-10607-fig6-data5.xlsx]

## Sheet: sh3.genesUp.BP_FAT.txt
Category	Term	Count	%	PValue	Genes	List Total	Pop Hits	Pop Total	Fold Enrichment	Bonferroni	Benjamini	FDR
GOTERM_BP_FAT	GO:0007049~cell cycle	37	6.61896	1.09957e-05	ENSMUSG00000022432, ENSMUSG00000069631, ENSMUSG00000020415, ENSMUSG00000021701, ENSMUSG00000030641, ENSMUSG00000024659, ENSMUSG00000050379, ENSMUSG00000054115, ENSMUSG00000036390, ENSMUSG00000025480, ENSMUSG00000009628, ENSMUSG00000034165, ENSMUSG00000020059, ENSMUSG00000027339, ENSMUSG00000038393, ENSMUSG00000028211, ENSMUSG00000057469, ENSMUSG00000017499, ENSMUSG00000028161, ENSMUSG00000026749,…	371	611	13588	2.2179	0.0179146	0.0179146	0.0184706
GOTERM_BP_FAT	GO:0007127~meiosis I	8	1.43113	3.65075e-05	ENSMUSG00000025480, ENSMUSG00000040629, ENSMUSG00000022429, ENSMUSG00000020415, ENSMUSG00000009628, ENSMUSG00000033644, ENSMUSG00000020059, ENSMUSG00000009670	371	35	13588	8.37151	0.0582538	0.0295639	0.0613133
GOTERM_BP_FAT	GO:0022403~cell cycle phase	22	3.9356	0.000259926	ENSMUSG00000057469, ENSMUSG00000017499, ENSMUSG00000022432, ENSMUSG00000028161, ENSMUSG00000026749, ENSMUSG00000020415, ENSMUSG00000033644, ENSMUSG00000036928, ENSMUSG00000009670, ENSMUSG00000020184, ENSMUSG00000054115, ENSMUSG00000036390, ENSMUSG00000039994, ENSMUSG00000028109, ENSMUSG00000025480, ENSMUSG00000000184, ENSMUSG00000040629, ENSMUSG00000020326, ENSMUSG00000022429, ENSMUSG00000009628,…	371	328	13588	2.45658	0.34778	0.132776	0.435768
GOTERM_BP_FAT	GO:0009069~serine family amino acid metabolic process	6	1.07335	0.000261756	ENSMUSG00000032350, ENSMUSG00000024640, ENSMUSG00000032607, ENSMUSG00000029446, ENSMUSG00000028179, ENSMUSG00000024039	371	22	13588	9.98873	0.34974	0.102009	0.43883
GOTERM_BP_FAT	GO:0016053~organic acid biosynthetic process	13	2.32558	0.00047248	ENSMUSG00000029446, ENSMUSG00000028179, ENSMUSG00000032262, ENSMUSG00000025068, ENSMUSG00000041220, ENSMUSG00000032349, ENSMUSG00000024640, ENSMUSG00000047250, ENSMUSG00000030268, ENSMUSG00000041926, ENSMUSG00000031604, ENSMUSG00000024039, ENSMUSG00000076441	371	141	13588	3.3768	0.54019	0.143917	0.79079
GOTERM_BP_FAT	GO:0046394~carboxylic acid biosynthetic process	13	2.32558	0.00047248	ENSMUSG00000029446, ENSMUSG00000028179, ENSMUSG00000032262, ENSMUSG00000025068, ENSMUSG00000041220, ENSMUSG00000032349, ENSMUSG00000024640, ENSMUSG00000047250, ENSMUSG00000030268, ENSMUSG00000041926, ENSMUSG00000031604, ENSMUSG00000024039, ENSMUSG00000076441	371	141	13588	3.3768	0.54019	0.143917	0.79079
GOTERM_BP_FAT	GO:0022402~cell cycle process	24	4.29338	0.000482099	ENSMUSG00000057469, ENSMUSG00000028211, ENSMUSG00000017499, ENSMUSG00000022432, ENSMUSG00000028161, ENSMUSG00000026749, ENSMUSG00000020415, ENSMUSG00000033644, ENSMUSG00000030641, ENSMUSG00000036928, ENSMUSG00000009670, ENSMUSG00000020184, ENSMUSG00000054115, ENSMUSG00000039994, ENSMUSG00000036390, ENSMUSG00000028109, ENSMUSG00000025480, ENSMUSG00000000184, ENSMUSG00000040629, ENSMUSG00000020326,…	371	393	13588	2.23666	0.547407	0.12377	0.806828
GOTERM_BP_FAT	GO:0007126~meiosis	10	1.78891	0.000640959	ENSMUSG00000025480, ENSMUSG00000040629, ENSMUSG00000022432, ENSMUSG00000022429, ENSMUSG00000020415, ENSMUSG00000009628, ENSMUSG00000033644, ENSMUSG00000020059, ENSMUSG00000036928, ENSMUSG00000009670	371	88	13588	4.16197	0.651485	0.139793	1.07135
GOTERM_BP_FAT	GO:0051327~M phase of meiotic cell cycle	10	1.78891	0.000640959	ENSMUSG00000025480, ENSMUSG00000040629, ENSMUSG00000022432, ENSMUSG00000022429, ENSMUSG00000020415, ENSMUSG00000009628, ENSMUSG00000033644, ENSMUSG00000020059, ENSMUSG00000036928, ENSMUSG00000009670	371	88	13588	4.16197	0.651485	0.139793	1.07135
GOTERM_BP_FAT	GO:0051321~meiotic cell cycle	10	1.78891	0.000755496	ENSMUSG00000025480, ENSMUSG00000040629, ENSMUSG00000022432, ENSMUSG00000022429, ENSMUSG00000020415, ENSMUSG00000009628, ENSMUSG00000033644, ENSMUSG00000020059, ENSMUSG00000036928, ENSMUSG00000009670	371	90	13588	4.06948	0.71134	0.143853	1.26165
GOTERM_BP_FAT	GO:0007129~synapsis	5	0.894454	0.000971662	ENSMUSG00000025480, ENSMUSG00000040629, ENSMUSG00000009628, ENSMUSG00000020059, ENSMUSG00000009670	371	17	13588	10.7722	0.797738	0.162703	1.61988
GOTERM_BP_FAT	GO:0070192~chromosome organization involved in meiosis	5	0.894454	0.000971662	ENSMUSG00000025480, ENSMUSG00000040629, ENSMUSG00000009628, ENSMUSG00000020059, ENSMUSG00000009670	371	17	13588	10.7722	0.797738	0.162703	1.61988
GOTERM_BP_FAT	GO:0009070~serine family amino acid biosynthetic process	4	0.715564	0.00101289	ENSMUSG00000024640, ENSMUSG00000029446, ENSMUSG00000028179, ENSMUSG00000024039	371	8	13588	18.3127	0.811006	0.153465	1.68807
GOTERM_BP_FAT	GO:0007130~synaptonemal complex assembly	4	0.715564	0.00148876	ENSMUSG00000025480, ENSMUSG00000009628, ENSMUSG00000020059, ENSMUSG00000009670	371	9	13588	16.2779	0.91365	0.199619	2.47185
GOTERM_BP_FAT	GO:0007140~male meiosis	5	0.894454	0.00151574	ENSMUSG00000040629, ENSMUSG00000022429, ENSMUSG00000009628, ENSMUSG00000036928, ENSMUSG00000009670	371	19	13588	9.63825	0.917401	0.187642	2.51611
GOTERM_BP_FAT	GO:0070193~synaptonemal complex organization	4	0.715564	0.00208406	ENSMUSG00000025480, ENSMUSG00000009628, ENSMUSG00000020059, ENSMUSG00000009670	371	10	13588	14.6501	0.967605	0.231894	3.44407
GOTERM_BP_FAT	GO:0006974~response to DNA damage stimulus	18	3.22004	0.00227391	ENSMUSG00000048756, ENSMUSG00000027663, ENSMUSG00000034206, ENSMUSG00000020415, ENSMUSG00000039187, ENSMUSG00000020423, ENSMUSG00000024742, ENSMUSG00000036390, ENSMUSG00000039994, ENSMUSG00000029591, ENSMUSG00000006818, ENSMUSG00000021668, ENSMUSG00000002083, ENSMUSG00000038569, ENSMUSG00000022429, ENSMUSG00000020038, ENSMUSG00000041801, ENSMUSG00000030609	371	287	13588	2.29706	0.976307	0.234576	3.75221
GOTERM_BP_FAT	GO:0006979~response to oxidative stress	9	1.61002	0.00251741	ENSMUSG00000032802, ENSMUSG00000038393, ENSMUSG00000032350, ENSMUSG00000006818, ENSMUSG00000047250, ENSMUSG00000003849, ENSMUSG00000027809, ENSMUSG00000026701, ENSMUSG00000033685	371	87	13588	3.78883	0.984138	0.241381	4.14606
GOTERM_BP_FAT	GO:0042325~regulation of phosphorylation	18	3.22004	0.00252081	ENSMUSG00000000276, ENSMUSG00000067336, ENSMUSG00000030203, ENSMUSG00000069631, ENSMUSG00000032601, ENSMUSG00000042626, ENSMUSG00000036390, ENSMUSG00000032501, ENSMUSG00000031383, ENSMUSG00000026483, ENSMUSG00000037706, ENSMUSG00000026177, ENSMUSG00000040653, ENSMUSG00000042228, ENSMUSG00000027317, ENSMUSG00000022469, ENSMUSG00000032494, ENSMUSG00000024039	371	290	13588	2.2733	0.984227	0.228439	4.15156
GOTERM_BP_FAT	GO:0006259~DNA metabolic process	23	4.11449	0.00271843	ENSMUSG00000026970, ENSMUSG00000017499, ENSMUSG00000026283, ENSMUSG00000034206, ENSMUSG00000012483, ENSMUSG00000020415, ENSMUSG00000039187, ENSMUSG00000033644, ENSMUSG00000024742, ENSMUSG00000009670, ENSMUSG00000078566, ENSMUSG00000029591, ENSMUSG00000052751, ENSMUSG00000006818, ENSMUSG00000031669, ENSMUSG00000040629, ENSMUSG00000021668, ENSMUSG00000038569, ENSMUSG00000022429, ENSMUSG00000020038,…	371	421	13588	2.00091	0.988612	0.231447	4.47007
GOTERM_BP_FAT	GO:0045132~meiotic chromosome segregation	4	0.715564	0.00280806	ENSMUSG00000020415, ENSMUSG00000020059, ENSMUSG00000036928, ENSMUSG00000009670	371	11	13588	13.3183	0.990176	0.226501	4.61421
GOTERM_BP_FAT	GO:0006260~DNA replication	12	2.14669	0.00296897	ENSMUSG00000026970, ENSMUSG00000017499, ENSMUSG00000052751, ENSMUSG00000031669, ENSMUSG00000026283, ENSMUSG00000021668, ENSMUSG00000034206, ENSMUSG00000012483, ENSMUSG00000002068, ENSMUSG00000025395, ENSMUSG00000026037, ENSMUSG00000024742	371	152	13588	2.89147	0.992465	0.226845	4.87245
GOTERM_BP_FAT	GO:0051174~regulation of phosphorus metabolic process	18	3.22004	0.00371228	ENSMUSG00000000276, ENSMUSG00000067336, ENSMUSG00000030203, ENSMUSG00000069631, ENSMUSG00000032601, ENSMUSG00000042626, ENSMUSG00000036390, ENSMUSG00000032501, ENSMUSG00000031383, ENSMUSG00000026483, ENSMUSG00000037706, ENSMUSG00000026177, ENSMUSG00000040653, ENSMUSG00000042228, ENSMUSG00000027317, ENSMUSG00000022469, ENSMUSG00000032494, ENSMUSG00000024039	371	301	13588	2.19022	0.997789	0.263405	6.05688
GOTERM_BP_FAT	GO:0019220~regulation of phosphate metabolic process	18	3.22004	0.00371228	ENSMUSG00000000276, ENSMUSG00000067336, ENSMUSG00000030203, ENSMUSG00000069631, ENSMUSG00000032601, ENSMUSG00000042626, ENSMUSG00000036390, ENSMUSG00000032501, ENSMUSG00000031383, ENSMUSG00000026483, ENSMUSG00000037706, ENSMUSG00000026177, ENSMUSG00000040653, ENSMUSG00000042228, ENSMUSG00000027317, ENSMUSG00000022469, ENSMUSG00000032494, ENSMUSG00000024039	371	301	13588	2.19022	0.997789	0.263405	6.05688
GOTERM_BP_FAT	GO:0051324~prophase	4	0.715564	0.00467428	ENSMUSG00000025480, ENSMUSG00000040629, ENSMUSG00000022429, ENSMUSG00000033644	371	13	13588	11.2693	0.999548	0.307043	7.5692
GOTERM_BP_FAT	GO:0007128~meiotic prophase I	4	0.715564	0.00467428	ENSMUSG00000025480, ENSMUSG00000040629, ENSMUSG00000022429, ENSMUSG00000033644	371	13	13588	11.2693	0.999548	0.307043	7.5692
GOTERM_BP_FAT	GO:0048010~vascular endothelial growth factor receptor signaling pathway	4	0.715564	0.00583017	ENSMUSG00000023951, ENSMUSG00000031520, ENSMUSG00000067336, ENSMUSG00000062960	371	14	13588	10.4644	0.999933	0.353995	9.35604
GOTERM_BP_FAT	GO:0008652~cellular amino acid biosynthetic process	6	1.07335	0.00661704	ENSMUSG00000024640, ENSMUSG00000029446, ENSMUSG00000030268, ENSMUSG00000028179, ENSMUSG00000024039, ENSMUSG00000076441	371	44	13588	4.99436	0.999982	0.377833	10.5538
GOTERM_BP_FAT	GO:0000278~mitotic cell cycle	15	2.68336	0.0070155	ENSMUSG00000057469, ENSMUSG00000017499, ENSMUSG00000028161, ENSMUSG00000026749, ENSMUSG00000020415, ENSMUSG00000021701, ENSMUSG00000020184, ENSMUSG00000054115, ENSMUSG00000036390, ENSMUSG00000039994, ENSMUSG00000028109, ENSMUSG00000000184, ENSMUSG00000020326, ENSMUSG00000029385, ENSMUSG00000020059	371	244	13588	2.25156	0.999991	0.382611	11.1546
GOTERM_BP_FAT	GO:0010608~posttranscriptional regulation of gene expression	11	1.9678	0.00728477	ENSMUSG00000026483, ENSMUSG00000023951, ENSMUSG00000026177, ENSMUSG00000031167, ENSMUSG00000022718, ENSMUSG00000045896, ENSMUSG00000040613, ENSMUSG00000033644, ENSMUSG00000029814, ENSMUSG00000025451, ENSMUSG00000010592	371	148	13588	2.72215	0.999994	0.381711	11.5585
GOTERM_BP_FAT	GO:0045137~development of primary sexual characteristics	9	1.61002	0.00746142	ENSMUSG00000026311, ENSMUSG00000023951, ENSMUSG00000022893, ENSMUSG00000048756, ENSMUSG00000062960, ENSMUSG00000022429, ENSMUSG00000021765, ENSMUSG00000009628, ENSMUSG00000009670	371	104	13588	3.1695	0.999996	0.377219	11.8225
GOTERM_BP_FAT	GO:0033554~cellular response to stress	21	3.75671	0.00754164	ENSMUSG00000048756, ENSMUSG00000027663, ENSMUSG00000024079, ENSMUSG00000034206, ENSMUSG00000020415, ENSMUSG00000039187, ENSMUSG00000020423, ENSMUSG00000024742, ENSMUSG00000026864, ENSMUSG00000036390, ENSMUSG00000039994, ENSMUSG00000026483, ENSMUSG00000029591, ENSMUSG00000006818, ENSMUSG00000002083, ENSMUSG00000021668, ENSMUSG00000038569, ENSMUSG00000022429, ENSMUSG00000020038, ENSMUSG00000041801,…	371	404	13588	1.90379	0.999996	0.369311	11.9422
GOTERM_BP_FAT	GO:0016265~death	25	4.47227	0.00818041	ENSMUSG00000028211, ENSMUSG00000021408, ENSMUSG00000034457, ENSMUSG00000021403, ENSMUSG00000019851, ENSMUSG00000027663, ENSMUSG00000020340, ENSMUSG00000024079, ENSMUSG00000026749, ENSMUSG00000028163, ENSMUSG00000034930, ENSMUSG00000035799, ENSMUSG00000030641, ENSMUSG00000063694, ENSMUSG00000078566, ENSMUSG00000026181, ENSMUSG00000056436, ENSMUSG00000006818, ENSMUSG00000068079, ENSMUSG00000002083,…	371	519	13588	1.76423	0.999999	0.382627	12.8895
GOTERM_BP_FAT	GO:0048255~mRNA stabilization	3	0.536673	0.0103155	ENSMUSG00000023951, ENSMUSG00000026177, ENSMUSG00000040613	371	6	13588	18.3127	1	0.444464	15.9868
GOTERM_BP_FAT	GO:0043489~RNA stabilization	3	0.536673	0.0103155	ENSMUSG00000023951, ENSMUSG00000026177, ENSMUSG00000040613	371	6	13588	18.3127	1	0.444464	15.9868
GOTERM_BP_FAT	GO:0051329~interphase of mitotic cell cycle	6	1.07335	0.0104068	ENSMUSG00000057469, ENSMUSG00000000184, ENSMUSG00000028161, ENSMUSG00000054115, ENSMUSG00000020184, ENSMUSG00000036390	371	49	13588	4.48474	1	0.436328	16.1169
GOTERM_BP_FAT	GO:0012501~programmed cell death	23	4.11449	0.0104103	ENSMUSG00000028211, ENSMUSG00000034457, ENSMUSG00000021408, ENSMUSG00000019851, ENSMUSG00000027663, ENSMUSG00000020340, ENSMUSG00000024079, ENSMUSG00000026749, ENSMUSG00000028163, ENSMUSG00000034930, ENSMUSG00000035799, ENSMUSG00000063694, ENSMUSG00000030641, ENSMUSG00000078566, ENSMUSG00000026181, ENSMUSG00000056436, ENSMUSG00000006818, ENSMUSG00000002083, ENSMUSG00000022074, ENSMUSG00000010911,…	371	473	13588	1.78094	1	0.425913	16.1218
GOTERM_BP_FAT	GO:0000279~M phase	16	2.86225	0.0108585	ENSMUSG00000017499, ENSMUSG00000022432, ENSMUSG00000026749, ENSMUSG00000020415, ENSMUSG00000033644, ENSMUSG00000036928, ENSMUSG00000009670, ENSMUSG00000039994, ENSMUSG00000028109, ENSMUSG00000025480, ENSMUSG00000040629, ENSMUSG00000020326, ENSMUSG00000022429, ENSMUSG00000029385, ENSMUSG00000009628, ENSMUSG00000020059	371	283	13588	2.07069	1	0.42931	16.7578
GOTERM_BP_FAT	GO:0008610~lipid biosynthetic process	16	2.86225	0.0115179	ENSMUSG00000028381, ENSMUSG00000003721, ENSMUSG00000032262, ENSMUSG00000041220, ENSMUSG00000027035, ENSMUSG00000032349, ENSMUSG00000056536, ENSMUSG00000031381, ENSMUSG00000037706, ENSMUSG00000021518, ENSMUSG00000047250, ENSMUSG00000030682, ENSMUSG00000041926, ENSMUSG00000031604, ENSMUSG00000006731, ENSMUSG00000008206	371	285	13588	2.05616	1	0.438492	17.6851
GOTERM_BP_FAT	GO:0008219~cell death	24	4.29338	0.0117195	ENSMUSG00000028211, ENSMUSG00000034457, ENSMUSG00000021408, ENSMUSG00000019851, ENSMUSG00000021403, ENSMUSG00000027663, ENSMUSG00000020340, ENSMUSG00000024079, ENSMUSG00000026749, ENSMUSG00000028163, ENSMUSG00000034930, ENSMUSG00000035799, ENSMUSG00000063694, ENSMUSG00000030641, ENSMUSG00000078566, ENSMUSG00000026181, ENSMUSG00000056436, ENSMUSG00000006818, ENSMUSG00000002083, ENSMUSG00000022074,…	371	507	13588	1.73374	1	0.434486	17.9668
GOTERM_BP_FAT	GO:0051325~interphase	6	1.07335	0.0122689	ENSMUSG00000057469, ENSMUSG00000000184, ENSMUSG00000028161, ENSMUSG00000054115, ENSMUSG00000020184, ENSMUSG00000036390	371	51	13588	4.30886	1	0.440019	18.7295
GOTERM_BP_FAT	GO:0010035~response to inorganic substance	8	1.43113	0.0126973	ENSMUSG00000032350, ENSMUSG00000027610, ENSMUSG00000006818, ENSMUSG00000026114, ENSMUSG00000026701, ENSMUSG00000033685, ENSMUSG00000028970, ENSMUSG00000003559	371	92	13588	3.18481	1	0.44209	19.3197
GOTERM_BP_FAT	GO:0003006~reproductive developmental process	15	2.68336	0.0134829	ENSMUSG00000022893, ENSMUSG00000048756, ENSMUSG00000000561, ENSMUSG00000009596, ENSMUSG00000009670, ENSMUSG00000010592, ENSMUSG00000026311, ENSMUSG00000031755, ENSMUSG00000023951, ENSMUSG00000015846, ENSMUSG00000062960, ENSMUSG00000000365, ENSMUSG00000022429, ENSMUSG00000021765, ENSMUSG00000009628	371	264	13588	2.08099	1	0.452916	20.3914
GOTERM_BP_FAT	GO:0006563~L-serine metabolic process	3	0.536673	0.0141833	ENSMUSG00000024640, ENSMUSG00000029446, ENSMUSG00000024039	371	7	13588	15.6966	1	0.460983	21.3356
GOTERM_BP_FAT	GO:0006534~cysteine metabolic process	3	0.536673	0.0141833	ENSMUSG00000032350, ENSMUSG00000028179, ENSMUSG00000024039	371	7	13588	15.6966	1	0.460983	21.3356
GOTERM_BP_FAT	GO:0008585~female gonad development	6	1.07335	0.0143447	ENSMUSG00000023951, ENSMUSG00000022893, ENSMUSG00000048756, ENSMUSG00000062960, ENSMUSG00000022429, ENSMUSG00000021765	371	53	13588	4.14626	1	0.456141	21.5517
GOTERM_BP_FAT	GO:0009309~amine biosynthetic process	7	1.25224	0.0144108	ENSMUSG00000079834, ENSMUSG00000024640, ENSMUSG00000029446, ENSMUSG00000030268, ENSMUSG00000028179, ENSMUSG00000024039, ENSMUSG00000076441	371	73	13588	3.51202	1	0.449315	21.6399
GOTERM_BP_FAT	GO:0006915~apoptosis	22	3.9356	0.0164705	ENSMUSG00000028211, ENSMUSG00000021408, ENSMUSG00000019851, ENSMUSG00000027663, ENSMUSG00000020340, ENSMUSG00000024079, ENSMUSG00000026749, ENSMUSG00000028163, ENSMUSG00000034930, ENSMUSG00000035799, ENSMUSG00000063694, ENSMUSG00000030641, ENSMUSG00000078566, ENSMUSG00000026181, ENSMUSG00000056436, ENSMUSG00000006818, ENSMUSG00000002083, ENSMUSG00000022074, ENSMUSG00000010911, ENSMUSG00000044636,…	371	465	13588	1.73281	1	0.486202	24.3461
GOTERM_BP_FAT	GO:0048511~rhythmic process	8	1.43113	0.0174842	ENSMUSG00000023951, ENSMUSG00000022893, ENSMUSG00000048756, ENSMUSG00000062960, ENSMUSG00000022429, ENSMUSG00000020038, ENSMUSG00000023087, ENSMUSG00000039994	371	98	13588	2.98982	1	0.498642	25.6454
GOTERM_BP_FAT	GO:0007292~female gamete generation	6	1.07335	0.0178804	ENSMUSG00000022893, ENSMUSG00000048756, ENSMUSG00000022429, ENSMUSG00000033644, ENSMUSG00000027794, ENSMUSG00000010592	371	56	13588	3.92414	1	0.498323	26.1475
GOTERM_BP_FAT	GO:0046942~carboxylic acid transport	8	1.43113	0.0183906	ENSMUSG00000041313, ENSMUSG00000035199, ENSMUSG00000026177, ENSMUSG00000022464, ENSMUSG00000020805, ENSMUSG00000001918, ENSMUSG00000031904, ENSMUSG00000024659	371	99	13588	2.95962	1	0.500194	26.7894
GOTERM_BP_FAT	GO:0019953~sexual reproduction	19	3.39893	0.0191301	ENSMUSG00000015365, ENSMUSG00000011751, ENSMUSG00000022893, ENSMUSG00000048756, ENSMUSG00000001507, ENSMUSG00000020530, ENSMUSG00000033644, ENSMUSG00000009596, ENSMUSG00000009670, ENSMUSG00000010592, ENSMUSG00000031755, ENSMUSG00000040629, ENSMUSG00000000365, ENSMUSG00000022429, ENSMUSG00000021765, ENSMUSG00000009628, ENSMUSG00000020059, ENSMUSG00000006731, ENSMUSG00000027794	371	386	13588	1.8028	1	0.506216	27.7104
GOTERM_BP_FAT	GO:0046545~development of primary female sexual characteristics	6	1.07335	0.0191759	ENSMUSG00000023951, ENSMUSG00000022893, ENSMUSG00000048756, ENSMUSG00000062960, ENSMUSG00000022429, ENSMUSG00000021765	371	57	13588	3.8553	1	0.49942	27.7672
GOTERM_BP_FAT	GO:0015849~organic acid transport	8	1.43113	0.0193294	ENSMUSG00000041313, ENSMUSG00000035199, ENSMUSG00000026177, ENSMUSG00000022464, ENSMUSG00000020805, ENSMUSG00000001918, ENSMUSG00000031904, ENSMUSG00000024659	371	100	13588	2.93003	1	0.494769	27.9569
GOTERM_BP_FAT	GO:0048477~oogenesis	5	0.894454	0.0210088	ENSMUSG00000048756, ENSMUSG00000022429, ENSMUSG00000033644, ENSMUSG00000027794, ENSMUSG00000010592	371	39	13588	4.69556	1	0.516748	30.0017
GOTERM_BP_FAT	GO:0007062~sister chromatid cohesion	3	0.536673	0.0234548	ENSMUSG00000022432, ENSMUSG00000020059, ENSMUSG00000036928	371	9	13588	12.2084	1	0.549009	32.8825
GOTERM_BP_FAT	GO:0048608~reproductive structure development	9	1.61002	0.0257769	ENSMUSG00000023951, ENSMUSG00000015846, ENSMUSG00000022893, ENSMUSG00000048756, ENSMUSG00000062960, ENSMUSG00000022429, ENSMUSG00000021765, ENSMUSG00000000561, ENSMUSG00000009670	371	130	13588	2.5356	1	0.57627	35.5138
GOTERM_BP_FAT	GO:0007548~sex differentiation	9	1.61002	0.0257769	ENSMUSG00000026311, ENSMUSG00000023951, ENSMUSG00000022893, ENSMUSG00000048756, ENSMUSG00000062960, ENSMUSG00000022429, ENSMUSG00000021765, ENSMUSG00000009628, ENSMUSG00000009670	371	130	13588	2.5356	1	0.57627	35.5138
GOTERM_BP_FAT	GO:0043405~regulation of MAP kinase activity	7	1.25224	0.0269053	ENSMUSG00000031383, ENSMUSG00000037706, ENSMUSG00000030203, ENSMUSG00000042626, ENSMUSG00000032494, ENSMUSG00000024039, ENSMUSG00000032501	371	84	13588	3.05211	1	0.584877	36.7572
GOTERM_BP_FAT	GO:0055085~transmembrane transport	21	3.75671	0.0270231	ENSMUSG00000018470, ENSMUSG00000052459, ENSMUSG00000027663, ENSMUSG00000054099, ENSMUSG00000011034, ENSMUSG00000040918, ENSMUSG00000026114, ENSMUSG00000020873, ENSMUSG00000028970, ENSMUSG00000026198, ENSMUSG00000041313, ENSMUSG00000037994, ENSMUSG00000020805, ENSMUSG00000025161, ENSMUSG00000024645, ENSMUSG00000017774, ENSMUSG00000028435, ENSMUSG00000034320, ENSMUSG00000031904, ENSMUSG00000033685,…	371	460	13588	1.67203	1	0.579411	36.8857
GOTERM_BP_FAT	GO:0007059~chromosome segregation	6	1.07335	0.0299794	ENSMUSG00000022432, ENSMUSG00000026749, ENSMUSG00000020415, ENSMUSG00000020059, ENSMUSG00000036928, ENSMUSG00000009670	371	64	13588	3.43363	1	0.61099	40.0311
GOTERM_BP_FAT	GO:0046660~female sex differentiation	6	1.07335	0.0299794	ENSMUSG00000023951, ENSMUSG00000022893, ENSMUSG00000048756, ENSMUSG00000062960, ENSMUSG00000022429, ENSMUSG00000021765	371	64	13588	3.43363	1	0.61099	40.0311
GOTERM_BP_FAT	GO:0048609~reproductive process in a multicellular organism	19	3.39893	0.0304676	ENSMUSG00000015365, ENSMUSG00000022893, ENSMUSG00000048756, ENSMUSG00000020530, ENSMUSG00000033644, ENSMUSG00000009596, ENSMUSG00000024513, ENSMUSG00000010592, ENSMUSG00000031755, ENSMUSG00000023951, ENSMUSG00000040629, ENSMUSG00000062960, ENSMUSG00000000365, ENSMUSG00000022429, ENSMUSG00000021765, ENSMUSG00000009628, ENSMUSG00000020059, ENSMUSG00000006731, ENSMUSG00000027794	371	409	13588	1.70142	1	0.61015	40.5361
GOTERM_BP_FAT	GO:0032504~multicellular organism reproduction	19	3.39893	0.0304676	ENSMUSG00000015365, ENSMUSG00000022893, ENSMUSG00000048756, ENSMUSG00000020530, ENSMUSG00000033644, ENSMUSG00000009596, ENSMUSG00000024513, ENSMUSG00000010592, ENSMUSG00000031755, ENSMUSG00000023951, ENSMUSG00000040629, ENSMUSG00000062960, ENSMUSG00000000365, ENSMUSG00000022429, ENSMUSG00000021765, ENSMUSG00000009628, ENSMUSG00000020059, ENSMUSG00000006731, ENSMUSG00000027794	371	409	13588	1.70142	1	0.61015	40.5361
GOTERM_BP_FAT	GO:0045859~regulation of protein kinase activity	11	1.9678	0.0311914	ENSMUSG00000000276, ENSMUSG00000031383, ENSMUSG00000037706, ENSMUSG00000030203, ENSMUSG00000026177, ENSMUSG00000069631, ENSMUSG00000042626, ENSMUSG00000032494, ENSMUSG00000024039, ENSMUSG00000032501, ENSMUSG00000036390	371	186	13588	2.16601	1	0.612171	41.2776
GOTERM_BP_FAT	GO:0008406~gonad development	7	1.25224	0.0328153	ENSMUSG00000023951, ENSMUSG00000022893, ENSMUSG00000048756, ENSMUSG00000062960, ENSMUSG00000022429, ENSMUSG00000021765, ENSMUSG00000009670	371	88	13588	2.91338	1	0.62451	42.9094
GOTERM_BP_FAT	GO:0043549~regulation of kinase activity	11	1.9678	0.0375202	ENSMUSG00000000276, ENSMUSG00000031383, ENSMUSG00000037706, ENSMUSG00000030203, ENSMUSG00000026177, ENSMUSG00000069631, ENSMUSG00000042626, ENSMUSG00000032494, ENSMUSG00000024039, ENSMUSG00000032501, ENSMUSG00000036390	371	192	13588	2.09833	1	0.668121	47.3999
GOTERM_BP_FAT	GO:0007276~gamete generation	16	2.86225	0.0377305	ENSMUSG00000015365, ENSMUSG00000022893, ENSMUSG00000048756, ENSMUSG00000020530, ENSMUSG00000033644, ENSMUSG00000009596, ENSMUSG00000010592, ENSMUSG00000031755, ENSMUSG00000040629, ENSMUSG00000000365, ENSMUSG00000022429, ENSMUSG00000021765, ENSMUSG00000009628, ENSMUSG00000020059, ENSMUSG00000006731, ENSMUSG00000027794	371	331	13588	1.77041	1	0.663838	47.5926
GOTERM_BP_FAT	GO:0022602~ovulation cycle process	5	0.894454	0.0385167	ENSMUSG00000023951, ENSMUSG00000022893, ENSMUSG00000048756, ENSMUSG00000062960, ENSMUSG00000022429	371	47	13588	3.89631	1	0.665279	48.3073
GOTERM_BP_FAT	GO:0000082~G1/S transition of mitotic cell cycle	4	0.715564	0.0396734	ENSMUSG00000057469, ENSMUSG00000000184, ENSMUSG00000028161, ENSMUSG00000054115	371	28	13588	5.23219	1	0.670178	49.3422
GOTERM_BP_FAT	GO:0031532~actin cytoskeleton reorganization	3	0.536673	0.0407537	ENSMUSG00000026270, ENSMUSG00000042626, ENSMUSG00000020593	371	12	13588	9.15633	1	0.674162	50.2911
GOTERM_BP_FAT	GO:0042698~ovulation cycle	5	0.894454	0.0411497	ENSMUSG00000023951, ENSMUSG00000022893, ENSMUSG00000048756, ENSMUSG00000062960, ENSMUSG00000022429	371	48	13588	3.81514	1	0.671828	50.6348
GOTERM_BP_FAT	GO:0006790~sulfur metabolic process	7	1.25224	0.0431591	ENSMUSG00000032350, ENSMUSG00000015536, ENSMUSG00000027610, ENSMUSG00000006818, ENSMUSG00000028179, ENSMUSG00000021638, ENSMUSG00000024039	371	94	13588	2.72742	1	0.683767	52.3442
GOTERM_BP_FAT	GO:0031047~gene silencing by RNA	4	0.715564	0.0433859	ENSMUSG00000040629, ENSMUSG00000031167, ENSMUSG00000022718, ENSMUSG00000033644	371	29	13588	5.05177	1	0.679981	52.5336
GOTERM_BP_FAT	GO:0006865~amino acid transport	6	1.07335	0.0439921	ENSMUSG00000041313, ENSMUSG00000035199, ENSMUSG00000026177, ENSMUSG00000022464, ENSMUSG00000001918, ENSMUSG00000031904	371	71	13588	3.0951	1	0.679502	53.0364
GOTERM_BP_FAT	GO:0051301~cell division	14	2.50447	0.0443039	ENSMUSG00000017499, ENSMUSG00000026749, ENSMUSG00000020415, ENSMUSG00000050379, ENSMUSG00000039994, ENSMUSG00000025480, ENSMUSG00000000184, ENSMUSG00000019917, ENSMUSG00000020326, ENSMUSG00000034165, ENSMUSG00000029385, ENSMUSG00000002068, ENSMUSG00000020059, ENSMUSG00000015932	371	281	13588	1.82475	1	0.676567	53.293
GOTERM_BP_FAT	GO:0051338~regulation of transferase activity	11	1.9678	0.0459358	ENSMUSG00000000276, ENSMUSG00000031383, ENSMUSG00000037706, ENSMUSG00000030203, ENSMUSG00000026177, ENSMUSG00000069631, ENSMUSG00000042626, ENSMUSG00000032494, ENSMUSG00000024039, ENSMUSG00000032501, ENSMUSG00000036390	371	199	13588	2.02452	1	0.68458	54.6149
GOTERM_BP_FAT	GO:0001655~urogenital system development	9	1.61002	0.04633	ENSMUSG00000026768, ENSMUSG00000015846, ENSMUSG00000029994, ENSMUSG00000022893, ENSMUSG00000011034, ENSMUSG00000032220, ENSMUSG00000000561, ENSMUSG00000027803, ENSMUSG00000039994	371	146	13588	2.25773	1	0.682372	54.9289
GOTERM_BP_FAT	GO:0007283~spermatogenesis	13	2.32558	0.0467609	ENSMUSG00000015365, ENSMUSG00000031755, ENSMUSG00000040629, ENSMUSG00000000365, ENSMUSG00000022429, ENSMUSG00000020530, ENSMUSG00000009628, ENSMUSG00000033644, ENSMUSG00000020059, ENSMUSG00000009596, ENSMUSG00000006731, ENSMUSG00000027794, ENSMUSG00000010592	371	255	13588	1.86717	1	0.680507	55.2698
GOTERM_BP_FAT	GO:0048232~male gamete generation	13	2.32558	0.0467609	ENSMUSG00000015365, ENSMUSG00000031755, ENSMUSG00000040629, ENSMUSG00000000365, ENSMUSG00000022429, ENSMUSG00000020530, ENSMUSG00000009628, ENSMUSG00000033644, ENSMUSG00000020059, ENSMUSG00000009596, ENSMUSG00000006731, ENSMUSG00000027794, ENSMUSG00000010592	371	255	13588	1.86717	1	0.680507	55.2698
GOTERM_BP_FAT	GO:0048610~reproductive cellular process	10	1.78891	0.0472777	ENSMUSG00000031755, ENSMUSG00000015846, ENSMUSG00000048756, ENSMUSG00000040629, ENSMUSG00000000365, ENSMUSG00000022429, ENSMUSG00000000561, ENSMUSG00000033644, ENSMUSG00000009596, ENSMUSG00000010592	371	173	13588	2.11707	1	0.679366	55.6755
GOTERM_BP_FAT	GO:0043488~regulation of mRNA stability	3	0.536673	0.0473136	ENSMUSG00000023951, ENSMUSG00000026177, ENSMUSG00000040613	371	13	13588	8.452	1	0.674472	55.7036
GOTERM_BP_FAT	GO:0042981~regulation of apoptosis	23	4.11449	0.0490991	ENSMUSG00000028211, ENSMUSG00000031511, ENSMUSG00000019851, ENSMUSG00000048756, ENSMUSG00000026270, ENSMUSG00000018166, ENSMUSG00000024431, ENSMUSG00000063694, ENSMUSG00000020423, ENSMUSG00000009670, ENSMUSG00000054115, ENSMUSG00000078566, ENSMUSG00000024026, ENSMUSG00000023951, ENSMUSG00000032350, ENSMUSG00000006818, ENSMUSG00000040629, ENSMUSG00000002083, ENSMUSG00000022074, ENSMUSG00000010911,…	371	553	13588	1.5233	1	0.683222	57.0778
GOTERM_BP_FAT	GO:0051276~chromosome organization	18	3.22004	0.0511599	ENSMUSG00000022421, ENSMUSG00000026283, ENSMUSG00000022432, ENSMUSG00000055027, ENSMUSG00000024431, ENSMUSG00000020415, ENSMUSG00000016559, ENSMUSG00000059851, ENSMUSG00000036928, ENSMUSG00000009670, ENSMUSG00000078566, ENSMUSG00000067567, ENSMUSG00000025480, ENSMUSG00000040629, ENSMUSG00000026803, ENSMUSG00000035021, ENSMUSG00000009628, ENSMUSG00000020059	371	404	13588	1.63182	1	0.693539	58.614
GOTERM_BP_FAT	GO:0019344~cysteine biosynthetic process	2	0.357782	0.0537203	ENSMUSG00000028179, ENSMUSG00000024039	371	2	13588	36.6253	1	0.706746	60.4507
GOTERM_BP_FAT	GO:0042771~DNA damage response, signal transduction by p53 class mediator resulting in induction of apoptosis	3	0.536673	0.0542275	ENSMUSG00000002083, ENSMUSG00000041801, ENSMUSG00000030609	371	14	13588	7.84829	1	0.705392	60.8053
GOTERM_BP_FAT	GO:0043067~regulation of programmed cell death	23	4.11449	0.0546391	ENSMUSG00000028211, ENSMUSG00000031511, ENSMUSG00000019851, ENSMUSG00000048756, ENSMUSG00000026270, ENSMUSG00000018166, ENSMUSG00000024431, ENSMUSG00000063694, ENSMUSG00000020423, ENSMUSG00000009670, ENSMUSG00000054115, ENSMUSG00000078566, ENSMUSG00000024026, ENSMUSG00000023951, ENSMUSG00000032350, ENSMUSG00000006818, ENSMUSG00000040629, ENSMUSG00000002083, ENSMUSG00000022074, ENSMUSG00000010911,…	371	560	13588	1.50425	1	0.703422	61.0909
GOTERM_BP_FAT	GO:0051241~negative regulation of multicellular organismal process	7	1.25224	0.0553442	ENSMUSG00000031755, ENSMUSG00000023951, ENSMUSG00000067336, ENSMUSG00000026177, ENSMUSG00000027712, ENSMUSG00000028163, ENSMUSG00000001985	371	100	13588	2.56377	1	0.703466	61.5756
GOTERM_BP_FAT	GO:0032270~positive regulation of cellular protein metabolic process	7	1.25224	0.0553442	ENSMUSG00000026483, ENSMUSG00000032350, ENSMUSG00000037706, ENSMUSG00000067336, ENSMUSG00000042228, ENSMUSG00000033644, ENSMUSG00000010592	371	100	13588	2.56377	1	0.703466	61.5756
GOTERM_BP_FAT	GO:0010941~regulation of cell death	23	4.11449	0.0575329	ENSMUSG00000028211, ENSMUSG00000031511, ENSMUSG00000019851, ENSMUSG00000048756, ENSMUSG00000026270, ENSMUSG00000018166, ENSMUSG00000024431, ENSMUSG00000063694, ENSMUSG00000020423, ENSMUSG00000009670, ENSMUSG00000054115, ENSMUSG00000078566, ENSMUSG00000024026, ENSMUSG00000023951, ENSMUSG00000032350, ENSMUSG00000006818, ENSMUSG00000040629, ENSMUSG00000002083, ENSMUSG00000022074, ENSMUSG00000010911,…	371	563	13588	1.49624	1	0.713179	63.0441
GOTERM_BP_FAT	GO:0001541~ovarian follicle development	4	0.715564	0.0598807	ENSMUSG00000023951, ENSMUSG00000048756, ENSMUSG00000062960, ENSMUSG00000022429	371	33	13588	4.43943	1	0.723348	64.5607
GOTERM_BP_FAT	GO:0045727~positive regulation of translation	3	0.536673	0.0614714	ENSMUSG00000026483, ENSMUSG00000033644, ENSMUSG00000010592	371	15	13588	7.32507	1	0.728483	65.5546
GOTERM_BP_FAT	GO:0043066~negative regulation of apoptosis	12	2.14669	0.0628401	ENSMUSG00000078566, ENSMUSG00000024026, ENSMUSG00000032350, ENSMUSG00000023951, ENSMUSG00000006818, ENSMUSG00000040629, ENSMUSG00000018166, ENSMUSG00000010911, ENSMUSG00000020059, ENSMUSG00000020423, ENSMUSG00000009670, ENSMUSG00000054115	371	239	13588	1.83893	1	0.732131	66.3889
GOTERM_BP_FAT	GO:0006767~water-soluble vitamin metabolic process	4	0.715564	0.0644015	ENSMUSG00000079834, ENSMUSG00000032350, ENSMUSG00000042751, ENSMUSG00000025068	371	34	13588	4.30886	1	0.736743	67.3174
GOTERM_BP_FAT	GO:0006631~fatty acid metabolic process	10	1.78891	0.0647396	ENSMUSG00000020333, ENSMUSG00000047250, ENSMUSG00000041926, ENSMUSG00000031604, ENSMUSG00000032262, ENSMUSG00000050737, ENSMUSG00000041220, ENSMUSG00000028167, ENSMUSG00000021884, ENSMUSG00000032349	371	184	13588	1.99051	1	0.734384	67.5152
GOTERM_BP_FAT	GO:0006606~protein import into nucleus	5	0.894454	0.0657791	ENSMUSG00000038393, ENSMUSG00000026177, ENSMUSG00000031691, ENSMUSG00000028161, ENSMUSG00000066232	371	56	13588	3.27012	1	0.735968	68.1165
GOTERM_BP_FAT	GO:0051726~regulation of cell cycle	11	1.9678	0.0681978	ENSMUSG00000015365, ENSMUSG00000000184, ENSMUSG00000073542, ENSMUSG00000026749, ENSMUSG00000029385, ENSMUSG00000034165, ENSMUSG00000002068, ENSMUSG00000054115, ENSMUSG00000020184, ENSMUSG00000036390, ENSMUSG00000010592	371	214	13588	1.88261	1	0.744915	69.4752
GOTERM_BP_FAT	GO:0043487~regulation of RNA stability	3	0.536673	0.0690222	ENSMUSG00000023951, ENSMUSG00000026177, ENSMUSG00000040613	371	16	13588	6.86725	1	0.745179	69.9258
GOTERM_BP_FAT	GO:0006338~chromatin remodeling	4	0.715564	0.0690748	ENSMUSG00000078566, ENSMUSG00000026803, ENSMUSG00000035021, ENSMUSG00000055027	371	35	13588	4.18575	1	0.741419	69.9543
GOTERM_BP_FAT	GO:0006633~fatty acid biosynthetic process	6	1.07335	0.0698248	ENSMUSG00000047250, ENSMUSG00000041926, ENSMUSG00000031604, ENSMUSG00000032262, ENSMUSG00000041220, ENSMUSG00000032349	371	81	13588	2.71299	1	0.741338	70.3584
GOTERM_BP_FAT	GO:0043069~negative regulation of programmed cell death	12	2.14669	0.069861	ENSMUSG00000078566, ENSMUSG00000024026, ENSMUSG00000032350, ENSMUSG00000023951, ENSMUSG00000006818, ENSMUSG00000040629, ENSMUSG00000018166, ENSMUSG00000010911, ENSMUSG00000020059, ENSMUSG00000020423, ENSMUSG00000009670, ENSMUSG00000054115	371	244	13588	1.80125	1	0.737567	70.3777
GOTERM_BP_FAT	GO:0006605~protein targeting	8	1.43113	0.0713415	ENSMUSG00000038393, ENSMUSG00000027828, ENSMUSG00000021709, ENSMUSG00000026177, ENSMUSG00000031691, ENSMUSG00000069631, ENSMUSG00000028161, ENSMUSG00000066232	371	133	13588	2.20303	1	0.741276	71.16
GOTERM_BP_FAT	GO:0001822~kidney development	7	1.25224	0.0719387	ENSMUSG00000026768, ENSMUSG00000029994, ENSMUSG00000022893, ENSMUSG00000011034, ENSMUSG00000032220, ENSMUSG00000027803, ENSMUSG00000039994	371	107	13588	2.39605	1	0.740437	71.47
GOTERM_BP_FAT	GO:0060548~negative regulation of cell death	12	2.14669	0.0721582	ENSMUSG00000078566, ENSMUSG00000024026, ENSMUSG00000032350, ENSMUSG00000023951, ENSMUSG00000006818, ENSMUSG00000040629, ENSMUSG00000018166, ENSMUSG00000010911, ENSMUSG00000020059, ENSMUSG00000020423, ENSMUSG00000009670, ENSMUSG00000054115	371	245	13588	1.79389	1	0.737715	71.5831
GOTERM_BP_FAT	GO:0051170~nuclear import	5	0.894454	0.0729085	ENSMUSG00000038393, ENSMUSG00000026177, ENSMUSG00000031691, ENSMUSG00000028161, ENSMUSG00000066232	371	58	13588	3.15736	1	0.737692	71.9667
GOTERM_BP_FAT	GO:0045598~regulation of fat cell differentiation	3	0.536673	0.0768581	ENSMUSG00000006818, ENSMUSG00000020593, ENSMUSG00000027803	371	17	13588	6.46329	1	0.753074	73.9069
GOTERM_BP_FAT	GO:0051247~positive regulation of protein metabolic process	7	1.25224	0.0771516	ENSMUSG00000026483, ENSMUSG00000032350, ENSMUSG00000037706, ENSMUSG00000067336, ENSMUSG00000042228, ENSMUSG00000033644, ENSMUSG00000010592	371	109	13588	2.35209	1	0.750786	74.0459
GOTERM_BP_FAT	GO:0043065~positive regulation of apoptosis	12	2.14669	0.0772709	ENSMUSG00000078566, ENSMUSG00000028211, ENSMUSG00000031511, ENSMUSG00000019851, ENSMUSG00000048756, ENSMUSG00000002083, ENSMUSG00000026270, ENSMUSG00000024431, ENSMUSG00000063694, ENSMUSG00000041801, ENSMUSG00000054115, ENSMUSG00000030609	371	248	13588	1.77219	1	0.747712	74.1022
GOTERM_BP_FAT	GO:0006352~transcription initiation	4	0.715564	0.0788648	ENSMUSG00000028899, ENSMUSG00000026803, ENSMUSG00000009596, ENSMUSG00000004044	371	37	13588	3.9595	1	0.751494	74.8436
GOTERM_BP_FAT	GO:0051307~meiotic chromosome separation	2	0.357782	0.0794912	ENSMUSG00000020059, ENSMUSG00000009670	371	3	13588	24.4169	1	0.750799	75.1294
GOTERM_BP_FAT	GO:0051304~chromosome separation	2	0.357782	0.0794912	ENSMUSG00000020059, ENSMUSG00000009670	371	3	13588	24.4169	1	0.750799	75.1294
GOTERM_BP_FAT	GO:0006564~L-serine biosynthetic process	2	0.357782	0.0794912	ENSMUSG00000024640, ENSMUSG00000029446	371	3	13588	24.4169	1	0.750799	75.1294
GOTERM_BP_FAT	GO:0043068~positive regulation of programmed cell death	12	2.14669	0.0800217	ENSMUSG00000078566, ENSMUSG00000028211, ENSMUSG00000031511, ENSMUSG00000019851, ENSMUSG00000048756, ENSMUSG00000002083, ENSMUSG00000026270, ENSMUSG00000024431, ENSMUSG00000063694, ENSMUSG00000041801, ENSMUSG00000054115, ENSMUSG00000030609	371	250	13588	1.75802	1	0.749684	75.3692
GOTERM_BP_FAT	GO:0032268~regulation of cellular protein metabolic process	13	2.32558	0.0816639	ENSMUSG00000067336, ENSMUSG00000045896, ENSMUSG00000032601, ENSMUSG00000033644, ENSMUSG00000010592, ENSMUSG00000026483, ENSMUSG00000032350, ENSMUSG00000037706, ENSMUSG00000042228, ENSMUSG00000022469, ENSMUSG00000024039, ENSMUSG00000029814, ENSMUSG00000025451	371	280	13588	1.70046	1	0.753539	76.0974
GOTERM_BP_FAT	GO:0010942~positive regulation of cell death	12	2.14669	0.0841593	ENSMUSG00000078566, ENSMUSG00000028211, ENSMUSG00000031511, ENSMUSG00000019851, ENSMUSG00000048756, ENSMUSG00000002083, ENSMUSG00000026270, ENSMUSG00000024431, ENSMUSG00000063694, ENSMUSG00000041801, ENSMUSG00000054115, ENSMUSG00000030609	371	252	13588	1.74406	1	0.760925	77.1655
GOTERM_BP_FAT	GO:0034504~protein localization in nucleus	5	0.894454	0.0843047	ENSMUSG00000038393, ENSMUSG00000026177, ENSMUSG00000031691, ENSMUSG00000028161, ENSMUSG00000066232	371	61	13588	3.00208	1	0.758167	77.2263
GOTERM_BP_FAT	GO:0016311~dephosphorylation	8	1.43113	0.0906792	ENSMUSG00000031383, ENSMUSG00000037926, ENSMUSG00000026181, ENSMUSG00000044573, ENSMUSG00000030203, ENSMUSG00000031337, ENSMUSG00000028161, ENSMUSG00000048371	371	141	13588	2.07803	1	0.780681	79.7481
GOTERM_BP_FAT	GO:0006461~protein complex assembly	11	1.9678	0.0922295	ENSMUSG00000026880, ENSMUSG00000028899, ENSMUSG00000031691, ENSMUSG00000027712, ENSMUSG00000026803, ENSMUSG00000067702, ENSMUSG00000009596, ENSMUSG00000066232, ENSMUSG00000004044, ENSMUSG00000024513, ENSMUSG00000001473	371	227	13588	1.7748	1	0.78338	80.3204
GOTERM_BP_FAT	GO:0070271~protein complex biogenesis	11	1.9678	0.0922295	ENSMUSG00000026880, ENSMUSG00000028899, ENSMUSG00000031691, ENSMUSG00000027712, ENSMUSG00000026803, ENSMUSG00000067702, ENSMUSG00000009596, ENSMUSG00000066232, ENSMUSG00000004044, ENSMUSG00000024513, ENSMUSG00000001473	371	227	13588	1.7748	1	0.78338	80.3204
GOTERM_BP_FAT	GO:0030330~DNA damage response, signal transduction by p53 class mediator	3	0.536673	0.0933017	ENSMUSG00000002083, ENSMUSG00000041801, ENSMUSG00000030609	371	19	13588	5.78295	1	0.784231	80.7073
GOTERM_CC_FAT	GO:0005783~endoplasmic reticulum	47	8.40787	1.16639e-06	ENSMUSG00000020869, ENSMUSG00000020333, ENSMUSG00000032374, ENSMUSG00000028381, ENSMUSG00000032932, ENSMUSG00000003721, ENSMUSG00000027822, ENSMUSG00000041220, ENSMUSG00000027035, ENSMUSG00000050812, ENSMUSG00000032349, ENSMUSG00000026864, ENSMUSG00000027828, ENSMUSG00000020282, ENSMUSG00000019188, ENSMUSG00000047250, ENSMUSG00000027963, ENSMUSG00000030682, ENSMUSG00000017747, ENSMUSG00000021236,…	327	838	12504	2.14464	0.000410485	0.000410485	0.00159659
GOTERM_CC_FAT	GO:0000228~nuclear chromosome	14	2.50447	1.58088e-05	ENSMUSG00000057469, ENSMUSG00000042524, ENSMUSG00000022432, ENSMUSG00000059851, ENSMUSG00000016559, ENSMUSG00000036928, ENSMUSG00000009670, ENSMUSG00000025480, ENSMUSG00000040629, ENSMUSG00000022429, ENSMUSG00000035021, ENSMUSG00000025395, ENSMUSG00000020059, ENSMUSG00000026037	327	121	12504	4.42429	0.0055493	0.00277851	0.0216376
GOTERM_CC_FAT	GO:0044454~nuclear chromosome part	12	2.14669	7.51561e-05	ENSMUSG00000025480, ENSMUSG00000057469, ENSMUSG00000042524, ENSMUSG00000040629, ENSMUSG00000022432, ENSMUSG00000025395, ENSMUSG00000020059, ENSMUSG00000016559, ENSMUSG00000059851, ENSMUSG00000026037, ENSMUSG00000036928, ENSMUSG00000009670	327	103	12504	4.45497	0.026109	0.00877988	0.102827
GOTERM_CC_FAT	GO:0000794~condensed nuclear chromosome	8	1.43113	9.4457e-05	ENSMUSG00000025480, ENSMUSG00000042524, ENSMUSG00000022432, ENSMUSG00000022429, ENSMUSG00000020059, ENSMUSG00000059851, ENSMUSG00000036928, ENSMUSG00000009670	327	42	12504	7.28353	0.0327037	0.00827815	0.129219
GOTERM_CC_FAT	GO:0044448~cell cortex part	10	1.78891	0.0001115	ENSMUSG00000038366, ENSMUSG00000011751, ENSMUSG00000018398, ENSMUSG00000033769, ENSMUSG00000019917, ENSMUSG00000029761, ENSMUSG00000070372, ENSMUSG00000024300, ENSMUSG00000050379, ENSMUSG00000015932	327	73	12504	5.23816	0.0384899	0.00781931	0.152518
GOTERM_CC_FAT	GO:0005739~mitochondrion	55	9.839	0.000547695	ENSMUSG00000020333, ENSMUSG00000032607, ENSMUSG00000022805, ENSMUSG00000041220, ENSMUSG00000042198, ENSMUSG00000026198, ENSMUSG00000079834, ENSMUSG00000037994, ENSMUSG00000005683, ENSMUSG00000020038, ENSMUSG00000030541, ENSMUSG00000032047, ENSMUSG00000006494, ENSMUSG00000052459, ENSMUSG00000054099, ENSMUSG00000028161, ENSMUSG00000042626, ENSMUSG00000031700, ENSMUSG00000028970, ENSMUSG00000038302,…	327	1322	12504	1.59086	0.175387	0.0316292	0.747106
GOTERM_CC_FAT	GO:0000795~synaptonemal complex	5	0.894454	0.00157896	ENSMUSG00000025480, ENSMUSG00000022432, ENSMUSG00000020059, ENSMUSG00000036928, ENSMUSG00000009670	327	20	12504	9.55963	0.426634	0.0763866	2.13982
GOTERM_CC_FAT	GO:0012505~endomembrane system	27	4.83005	0.00171338	ENSMUSG00000032997, ENSMUSG00000050737, ENSMUSG00000016534, ENSMUSG00000041220, ENSMUSG00000078566, ENSMUSG00000027828, ENSMUSG00000026177, ENSMUSG00000019188, ENSMUSG00000027963, ENSMUSG00000017747, ENSMUSG00000072944, ENSMUSG00000006731, ENSMUSG00000040249, ENSMUSG00000042524, ENSMUSG00000031770, ENSMUSG00000030659, ENSMUSG00000028970, ENSMUSG00000056536, ENSMUSG00000031381, ENSMUSG00000028838,…	327	535	12504	1.9298	0.453175	0.0726769	2.32001
GOTERM_CC_FAT	GO:0000793~condensed chromosome	10	1.78891	0.00190235	ENSMUSG00000025480, ENSMUSG00000042524, ENSMUSG00000022432, ENSMUSG00000022429, ENSMUSG00000020059, ENSMUSG00000059851, ENSMUSG00000026037, ENSMUSG00000036928, ENSMUSG00000009670, ENSMUSG00000036672	327	107	12504	3.57369	0.488428	0.0717684	2.57282
GOTERM_CC_FAT	GO:0030864~cortical actin cytoskeleton	5	0.894454	0.00228801	ENSMUSG00000038366, ENSMUSG00000011751, ENSMUSG00000029761, ENSMUSG00000024300, ENSMUSG00000015932	327	22	12504	8.69058	0.553494	0.0774653	3.08686
GOTERM_CC_FAT	GO:0005694~chromosome	20	3.57782	0.00487078	ENSMUSG00000057469, ENSMUSG00000022421, ENSMUSG00000026626, ENSMUSG00000042524, ENSMUSG00000022432, ENSMUSG00000039187, ENSMUSG00000016559, ENSMUSG00000059851, ENSMUSG00000009596, ENSMUSG00000036928, ENSMUSG00000009670, ENSMUSG00000024513, ENSMUSG00000025480, ENSMUSG00000040629, ENSMUSG00000022429, ENSMUSG00000035021, ENSMUSG00000025395, ENSMUSG00000020059, ENSMUSG00000026037, ENSMUSG00000036672	327	378	12504	2.0232	0.820701	0.144651	6.46514
GOTERM_CC_FAT	GO:0030863~cortical cytoskeleton	6	1.07335	0.00499091	ENSMUSG00000038366, ENSMUSG00000011751, ENSMUSG00000029761, ENSMUSG00000070372, ENSMUSG00000024300, ENSMUSG00000015932	327	43	12504	5.33561	0.828161	0.136505	6.61958
GOTERM_CC_FAT	GO:0008305~integrin complex	5	0.894454	0.00566455	ENSMUSG00000020689, ENSMUSG00000026768, ENSMUSG00000039115, ENSMUSG00000001507, ENSMUSG00000028102	327	28	12504	6.82831	0.864609	0.142569	7.48125
GOTERM_CC_FAT	GO:0005938~cell cortex	10	1.78891	0.00569217	ENSMUSG00000038366, ENSMUSG00000011751, ENSMUSG00000018398, ENSMUSG00000033769, ENSMUSG00000019917, ENSMUSG00000029761, ENSMUSG00000070372, ENSMUSG00000024300, ENSMUSG00000050379, ENSMUSG00000015932	327	126	12504	3.0348	0.865927	0.133702	7.51643
GOTERM_CC_FAT	GO:0044427~chromosomal part	17	3.04114	0.00928895	ENSMUSG00000057469, ENSMUSG00000022421, ENSMUSG00000042524, ENSMUSG00000026626, ENSMUSG00000022432, ENSMUSG00000016559, ENSMUSG00000059851, ENSMUSG00000009596, ENSMUSG00000036928, ENSMUSG00000009670, ENSMUSG00000024513, ENSMUSG00000025480, ENSMUSG00000040629, ENSMUSG00000025395, ENSMUSG00000020059, ENSMUSG00000026037, ENSMUSG00000036672	327	318	12504	2.0442	0.962559	0.196678	11.9922
GOTERM_CC_FAT	GO:0000267~cell fraction	26	4.65116	0.0132323	ENSMUSG00000026208, ENSMUSG00000020333, ENSMUSG00000020869, ENSMUSG00000048756, ENSMUSG00000032932, ENSMUSG00000029761, ENSMUSG00000050737, ENSMUSG00000016534, ENSMUSG00000047250, ENSMUSG00000040653, ENSMUSG00000006373, ENSMUSG00000003559, ENSMUSG00000040249, ENSMUSG00000037242, ENSMUSG00000047676, ENSMUSG00000001999, ENSMUSG00000020340, ENSMUSG00000001507, ENSMUSG00000028161, ENSMUSG00000022206,…	327	596	12504	1.66812	0.990803	0.254019	16.6681
GOTERM_CC_FAT	GO:0005768~endosome	14	2.50447	0.0150167	ENSMUSG00000081534, ENSMUSG00000042524, ENSMUSG00000051343, ENSMUSG00000031438, ENSMUSG00000021706, ENSMUSG00000016534, ENSMUSG00000015652, ENSMUSG00000050812, ENSMUSG00000025351, ENSMUSG00000026177, ENSMUSG00000020297, ENSMUSG00000034109, ENSMUSG00000031479, ENSMUSG00000037295	327	252	12504	2.12436	0.995136	0.268965	18.7073
GOTERM_CC_FAT	GO:0030666~endocytic vesicle membrane	3	0.536673	0.0216124	ENSMUSG00000026177, ENSMUSG00000016534, ENSMUSG00000037295	327	9	12504	12.7462	0.999543	0.347716	25.8501
GOTERM_CC_FAT	GO:0031975~envelope	23	4.11449	0.0266465	ENSMUSG00000020333, ENSMUSG00000042524, ENSMUSG00000051343, ENSMUSG00000054099, ENSMUSG00000050737, ENSMUSG00000030659, ENSMUSG00000078566, ENSMUSG00000026198, ENSMUSG00000026425, ENSMUSG00000006818, ENSMUSG00000026177, ENSMUSG00000031691, ENSMUSG00000002083, ENSMUSG00000022551, ENSMUSG00000072944, ENSMUSG00000017747, ENSMUSG00000017774, ENSMUSG00000027809, ENSMUSG00000066232, ENSMUSG00000031776,…	327	542	12504	1.62267	0.999926	0.393687	30.9055
GOTERM_CC_FAT	GO:0031980~mitochondrial lumen	10	1.78891	0.0270303	ENSMUSG00000079834, ENSMUSG00000056436, ENSMUSG00000006494, ENSMUSG00000006818, ENSMUSG00000005683, ENSMUSG00000028527, ENSMUSG00000027809, ENSMUSG00000029455, ENSMUSG00000063694, ENSMUSG00000024782	327	163	12504	2.34592	0.999935	0.382627	31.2775
GOTERM_CC_FAT	GO:0005759~mitochondrial matrix	10	1.78891	0.0270303	ENSMUSG00000079834, ENSMUSG00000056436, ENSMUSG00000006494, ENSMUSG00000006818, ENSMUSG00000005683, ENSMUSG00000028527, ENSMUSG00000027809, ENSMUSG00000029455, ENSMUSG00000063694, ENSMUSG00000024782	327	163	12504	2.34592	0.999935	0.382627	31.2775
GOTERM_CC_FAT	GO:0005770~late endosome	5	0.894454	0.0271664	ENSMUSG00000025351, ENSMUSG00000026177, ENSMUSG00000031438, ENSMUSG00000031479, ENSMUSG00000016534	327	44	12504	4.34529	0.999938	0.369763	31.4089
GOTERM_CC_FAT	GO:0016323~basolateral plasma membrane	9	1.61002	0.0313279	ENSMUSG00000037926, ENSMUSG00000038366, ENSMUSG00000021709, ENSMUSG00000001507, ENSMUSG00000038403, ENSMUSG00000028435, ENSMUSG00000031207, ENSMUSG00000024659, ENSMUSG00000037295	327	141	12504	2.44076	0.999986	0.399063	35.3181
GOTERM_CC_FAT	GO:0031090~organelle membrane	31	5.54562	0.0322427	ENSMUSG00000020333, ENSMUSG00000032997, ENSMUSG00000016534, ENSMUSG00000041220, ENSMUSG00000026198, ENSMUSG00000078566, ENSMUSG00000027828, ENSMUSG00000026177, ENSMUSG00000019188, ENSMUSG00000027963, ENSMUSG00000027809, ENSMUSG00000006731, ENSMUSG00000030541, ENSMUSG00000032047, ENSMUSG00000028581, ENSMUSG00000031770, ENSMUSG00000051343, ENSMUSG00000054099, ENSMUSG00000030659, ENSMUSG00000028970,…	327	809	12504	1.46526	0.99999	0.39443	36.1493
GOTERM_CC_FAT	GO:0044420~extracellular matrix part	7	1.25224	0.0329764	ENSMUSG00000042116, ENSMUSG00000023951, ENSMUSG00000027204, ENSMUSG00000022893, ENSMUSG00000041445, ENSMUSG00000026479, ENSMUSG00000028763	327	92	12504	2.90945	0.999993	0.388481	36.8087
GOTERM_CC_FAT	GO:0044429~mitochondrial part	22	3.9356	0.0334976	ENSMUSG00000006494, ENSMUSG00000020333, ENSMUSG00000051343, ENSMUSG00000054099, ENSMUSG00000028527, ENSMUSG00000029455, ENSMUSG00000063694, ENSMUSG00000078566, ENSMUSG00000079834, ENSMUSG00000026198, ENSMUSG00000056436, ENSMUSG00000026425, ENSMUSG00000006818, ENSMUSG00000002083, ENSMUSG00000005683, ENSMUSG00000022551, ENSMUSG00000027809, ENSMUSG00000031776, ENSMUSG00000024782, ENSMUSG00000033685,…	327	524	12504	1.60543	0.999994	0.381048	37.2734
GOTERM_CC_FAT	GO:0005604~basement membrane	6	1.07335	0.0416017	ENSMUSG00000042116, ENSMUSG00000023951, ENSMUSG00000022893, ENSMUSG00000041445, ENSMUSG00000026479, ENSMUSG00000028763	327	73	12504	3.14289	1	0.437449	44.1021
GOTERM_CC_FAT	GO:0031967~organelle envelope	22	3.9356	0.043794	ENSMUSG00000020333, ENSMUSG00000042524, ENSMUSG00000051343, ENSMUSG00000054099, ENSMUSG00000050737, ENSMUSG00000030659, ENSMUSG00000078566, ENSMUSG00000026198, ENSMUSG00000026425, ENSMUSG00000006818, ENSMUSG00000031691, ENSMUSG00000002083, ENSMUSG00000022551, ENSMUSG00000072944, ENSMUSG00000017747, ENSMUSG00000017774, ENSMUSG00000027809, ENSMUSG00000066232, ENSMUSG00000031776, ENSMUSG00000033685,…	327	540	12504	1.55787	1	0.442238	45.8272
GOTERM_CC_FAT	GO:0005635~nuclear envelope	9	1.61002	0.0470697	ENSMUSG00000078566, ENSMUSG00000042524, ENSMUSG00000031691, ENSMUSG00000072944, ENSMUSG00000017747, ENSMUSG00000017774, ENSMUSG00000050737, ENSMUSG00000066232, ENSMUSG00000030659	327	153	12504	2.24933	1	0.454533	48.3131
GOTERM_CC_FAT	GO:0031105~septin complex	3	0.536673	0.0501582	ENSMUSG00000018398, ENSMUSG00000019917, ENSMUSG00000050379	327	14	12504	8.19397	1	0.464533	50.5596
GOTERM_CC_FAT	GO:0032156~septin cytoskeleton	3	0.536673	0.0501582	ENSMUSG00000018398, ENSMUSG00000019917, ENSMUSG00000050379	327	14	12504	8.19397	1	0.464533	50.5596
GOTERM_CC_FAT	GO:0005829~cytosol	22	3.9356	0.0511685	ENSMUSG00000032802, ENSMUSG00000022421, ENSMUSG00000042770, ENSMUSG00000015536, ENSMUSG00000052459, ENSMUSG00000028161, ENSMUSG00000020176, ENSMUSG00000028228, ENSMUSG00000028163, ENSMUSG00000024431, ENSMUSG00000021638, ENSMUSG00000063694, ENSMUSG00000018411, ENSMUSG00000026893, ENSMUSG00000060073, ENSMUSG00000032350, ENSMUSG00000030268, ENSMUSG00000029223, ENSMUSG00000026701, ENSMUSG00000004044,…	327	549	12504	1.53233	1	0.460052	51.2746
GOTERM_CC_FAT	GO:0008287~protein serine/threonine phosphatase complex	4	0.715564	0.0579934	ENSMUSG00000026181, ENSMUSG00000026626, ENSMUSG00000028161, ENSMUSG00000048371	327	34	12504	4.49865	1	0.492558	55.8592
GOTERM_CC_FAT	GO:0042175~nuclear envelope-endoplasmic reticulum network	9	1.61002	0.0582874	ENSMUSG00000027828, ENSMUSG00000031381, ENSMUSG00000031770, ENSMUSG00000028838, ENSMUSG00000019188, ENSMUSG00000027963, ENSMUSG00000030659, ENSMUSG00000041220, ENSMUSG00000056536	327	160	12504	2.15092	1	0.483462	56.0474
GOTERM_CC_FAT	GO:0031300~intrinsic to organelle membrane	7	1.25224	0.072555	ENSMUSG00000078566, ENSMUSG00000027828, ENSMUSG00000028838, ENSMUSG00000027963, ENSMUSG00000028102, ENSMUSG00000006731, ENSMUSG00000041220	327	112	12504	2.38991	1	0.55221	64.3361
GOTERM_CC_FAT	GO:0000802~transverse filament	2	0.357782	0.0761994	ENSMUSG00000020059, ENSMUSG00000036928	327	3	12504	25.4924	1	0.559817	66.2074
GOTERM_CC_FAT	GO:0044432~endoplasmic reticulum part	11	1.9678	0.0808988	ENSMUSG00000027828, ENSMUSG00000031381, ENSMUSG00000031770, ENSMUSG00000028838, ENSMUSG00000019188, ENSMUSG00000005973, ENSMUSG00000027963, ENSMUSG00000021236, ENSMUSG00000041220, ENSMUSG00000056536, ENSMUSG00000026864	327	231	12504	1.82088	1	0.571906	68.486
GOTERM_CC_FAT	GO:0005794~Golgi apparatus	25	4.47227	0.0835162	ENSMUSG00000033114, ENSMUSG00000019851, ENSMUSG00000030161, ENSMUSG00000031438, ENSMUSG00000032997, ENSMUSG00000028086, ENSMUSG00000042751, ENSMUSG00000038170, ENSMUSG00000028970, ENSMUSG00000020088, ENSMUSG00000042428, ENSMUSG00000032549, ENSMUSG00000032226, ENSMUSG00000020282, ENSMUSG00000020297, ENSMUSG00000034109, ENSMUSG00000028480, ENSMUSG00000037280, ENSMUSG00000042228, ENSMUSG00000030682,…	327	682	12504	1.40171	1	0.57375	69.6925
GOTERM_CC_FAT	GO:0019867~outer membrane	6	1.07335	0.0858948	ENSMUSG00000078566, ENSMUSG00000026198, ENSMUSG00000020333, ENSMUSG00000051343, ENSMUSG00000026177, ENSMUSG00000030659	327	90	12504	2.54924	1	0.574464	70.7517
GOTERM_CC_FAT	GO:0005773~vacuole	10	1.78891	0.0864569	ENSMUSG00000030560, ENSMUSG00000081534, ENSMUSG00000025351, ENSMUSG00000030161, ENSMUSG00000026177, ENSMUSG00000025512, ENSMUSG00000031479, ENSMUSG00000016534, ENSMUSG00000026701, ENSMUSG00000028581	327	204	12504	1.87444	1	0.56726	70.9969
GOTERM_CC_FAT	GO:0005764~lysosome	9	1.61002	0.0943532	ENSMUSG00000030560, ENSMUSG00000081534, ENSMUSG00000025351, ENSMUSG00000026177, ENSMUSG00000025512, ENSMUSG00000031479, ENSMUSG00000016534, ENSMUSG00000026701, ENSMUSG00000028581	327	178	12504	1.93341	1	0.591186	74.2465
GOTERM_CC_FAT	GO:0043228~non-membrane-bounded organelle	60	10.7335	0.0955381	ENSMUSG00000026880, ENSMUSG00000022432, ENSMUSG00000050812, ENSMUSG00000025480, ENSMUSG00000030064, ENSMUSG00000011751, ENSMUSG00000047676, ENSMUSG00000042524, ENSMUSG00000017499, ENSMUSG00000035199, ENSMUSG00000030161, ENSMUSG00000032220, ENSMUSG00000031207, ENSMUSG00000068744, ENSMUSG00000009670, ENSMUSG00000024513, ENSMUSG00000001473, ENSMUSG00000020184, ENSMUSG00000038175, ENSMUSG00000017774,…	327	1919	12504	1.19558	1	0.58673	74.7039
GOTERM_CC_FAT	GO:0043232~intracellular non-membrane-bounded organelle	60	10.7335	0.0955381	ENSMUSG00000026880, ENSMUSG00000022432, ENSMUSG00000050812, ENSMUSG00000025480, ENSMUSG00000030064, ENSMUSG00000011751, ENSMUSG00000047676, ENSMUSG00000042524, ENSMUSG00000017499, ENSMUSG00000035199, ENSMUSG00000030161, ENSMUSG00000032220, ENSMUSG00000031207, ENSMUSG00000068744, ENSMUSG00000009670, ENSMUSG00000024513, ENSMUSG00000001473, ENSMUSG00000020184, ENSMUSG00000038175, ENSMUSG00000017774,…	327	1919	12504	1.19558	1	0.58673	74.7039
GOTERM_CC_FAT	GO:0000323~lytic vacuole	9	1.61002	0.0966637	ENSMUSG00000030560, ENSMUSG00000081534, ENSMUSG00000025351, ENSMUSG00000026177, ENSMUSG00000025512, ENSMUSG00000031479, ENSMUSG00000016534, ENSMUSG00000026701, ENSMUSG00000028581	327	179	12504	1.92261	1	0.582216	75.1314
GOTERM_CC_FAT	GO:0005626~insoluble fraction	20	3.57782	0.0971975	ENSMUSG00000040249, ENSMUSG00000047676, ENSMUSG00000026208, ENSMUSG00000020869, ENSMUSG00000020333, ENSMUSG00000048756, ENSMUSG00000020340, ENSMUSG00000032932, ENSMUSG00000001507, ENSMUSG00000028161, ENSMUSG00000029761, ENSMUSG00000022206, ENSMUSG00000050737, ENSMUSG00000016534, ENSMUSG00000027162, ENSMUSG00000024313, ENSMUSG00000047250, ENSMUSG00000040653, ENSMUSG00000006373, ENSMUSG00000004044	327	528	12504	1.44843	1	0.575552	75.3318
GOTERM_MF_FAT	GO:0008483~transaminase activity	7	1.25224	3.53709e-05	ENSMUSG00000024640, ENSMUSG00000032607, ENSMUSG00000075023, ENSMUSG00000030268, ENSMUSG00000039720, ENSMUSG00000040213, ENSMUSG00000031700	364	24	13288	10.6474	0.0203758	0.0203758	0.0520097
GOTERM_MF_FAT	GO:0016769~transferase activity, transferring nitrogenous groups	7	1.25224	0.000197991	ENSMUSG00000024640, ENSMUSG00000032607, ENSMUSG00000075023, ENSMUSG00000030268, ENSMUSG00000039720, ENSMUSG00000040213, ENSMUSG00000031700	364	32	13288	7.98558	0.10885	0.0559925	0.290804
GOTERM_MF_FAT	GO:0019842~vitamin binding	12	2.14669	0.000473658	ENSMUSG00000079834, ENSMUSG00000024640, ENSMUSG00000032374, ENSMUSG00000075023, ENSMUSG00000033059, ENSMUSG00000039720, ENSMUSG00000028179, ENSMUSG00000040213, ENSMUSG00000040918, ENSMUSG00000024039, ENSMUSG00000031700, ENSMUSG00000021884	364	121	13288	3.62038	0.240985	0.087814	0.694383
GOTERM_MF_FAT	GO:0070279~vitamin B6 binding	8	1.43113	0.000628279	ENSMUSG00000024640, ENSMUSG00000075023, ENSMUSG00000033059, ENSMUSG00000039720, ENSMUSG00000028179, ENSMUSG00000040213, ENSMUSG00000024039, ENSMUSG00000031700	364	54	13288	5.40822	0.30634	0.087387	0.920084
GOTERM_MF_FAT	GO:0030170~pyridoxal phosphate binding	8	1.43113	0.000628279	ENSMUSG00000024640, ENSMUSG00000075023, ENSMUSG00000033059, ENSMUSG00000039720, ENSMUSG00000028179, ENSMUSG00000040213, ENSMUSG00000024039, ENSMUSG00000031700	364	54	13288	5.40822	0.30634	0.087387	0.920084
GOTERM_MF_FAT	GO:0048037~cofactor binding	16	2.86225	0.00139418	ENSMUSG00000040213, ENSMUSG00000028179, ENSMUSG00000031700, ENSMUSG00000015652, ENSMUSG00000028167, ENSMUSG00000032558, ENSMUSG00000024640, ENSMUSG00000032350, ENSMUSG00000075023, ENSMUSG00000033059, ENSMUSG00000003849, ENSMUSG00000039720, ENSMUSG00000024039, ENSMUSG00000020648, ENSMUSG00000030541, ENSMUSG00000021884	364	226	13288	2.58446	0.556021	0.149895	2.03103
GOTERM_MF_FAT	GO:0000166~nucleotide binding	82	14.6691	0.00190925	ENSMUSG00000032802, ENSMUSG00000024422, ENSMUSG00000020333, ENSMUSG00000031441, ENSMUSG00000032932, ENSMUSG00000022432, ENSMUSG00000031167, ENSMUSG00000069631, ENSMUSG00000032601, ENSMUSG00000034206, ENSMUSG00000034930, ENSMUSG00000042751, ENSMUSG00000015652, ENSMUSG00000032501, ENSMUSG00000032549, ENSMUSG00000026198, ENSMUSG00000027610, ENSMUSG00000020038, ENSMUSG00000030541, ENSMUSG00000029814,…	364	2183	13288	1.37126	0.67118	0.169207	2.77161
GOTERM_MF_FAT	GO:0017076~purine nucleotide binding	72	12.8801	0.0021461	ENSMUSG00000032802, ENSMUSG00000024422, ENSMUSG00000020333, ENSMUSG00000031441, ENSMUSG00000032932, ENSMUSG00000022432, ENSMUSG00000069631, ENSMUSG00000032601, ENSMUSG00000034206, ENSMUSG00000034930, ENSMUSG00000042751, ENSMUSG00000015652, ENSMUSG00000032501, ENSMUSG00000032549, ENSMUSG00000026198, ENSMUSG00000027610, ENSMUSG00000000276, ENSMUSG00000021408, ENSMUSG00000006494, ENSMUSG00000067336,…	364	1871	13288	1.40481	0.713602	0.16358	3.11041
GOTERM_MF_FAT	GO:0016846~carbon-sulfur lyase activity	4	0.715564	0.0028335	ENSMUSG00000024026, ENSMUSG00000075023, ENSMUSG00000028179, ENSMUSG00000040213	364	11	13288	13.2747	0.808226	0.186517	4.08745
GOTERM_MF_FAT	GO:0032555~purine ribonucleotide binding	69	12.3435	0.00290033	ENSMUSG00000032802, ENSMUSG00000024422, ENSMUSG00000020333, ENSMUSG00000031441, ENSMUSG00000032932, ENSMUSG00000022432, ENSMUSG00000069631, ENSMUSG00000032601, ENSMUSG00000034206, ENSMUSG00000034930, ENSMUSG00000042751, ENSMUSG00000032501, ENSMUSG00000032549, ENSMUSG00000026198, ENSMUSG00000027610, ENSMUSG00000000276, ENSMUSG00000021408, ENSMUSG00000006494, ENSMUSG00000067336, ENSMUSG00000017499,…	364	1796	13288	1.40249	0.815563	0.171242	4.18195
GOTERM_MF_FAT	GO:0032553~ribonucleotide binding	69	12.3435	0.00290033	ENSMUSG00000032802, ENSMUSG00000024422, ENSMUSG00000020333, ENSMUSG00000031441, ENSMUSG00000032932, ENSMUSG00000022432, ENSMUSG00000069631, ENSMUSG00000032601, ENSMUSG00000034206, ENSMUSG00000034930, ENSMUSG00000042751, ENSMUSG00000032501, ENSMUSG00000032549, ENSMUSG00000026198, ENSMUSG00000027610, ENSMUSG00000000276, ENSMUSG00000021408, ENSMUSG00000006494, ENSMUSG00000067336, ENSMUSG00000017499,…	364	1796	13288	1.40249	0.815563	0.171242	4.18195
GOTERM_MF_FAT	GO:0005544~calcium-dependent phospholipid binding	5	0.894454	0.00377502	ENSMUSG00000029994, ENSMUSG00000029484, ENSMUSG00000027712, ENSMUSG00000024659, ENSMUSG00000016200	364	24	13288	7.60531	0.889332	0.197579	5.4108
GOTERM_MF_FAT	GO:0019001~guanyl nucleotide binding	20	3.57782	0.00525085	ENSMUSG00000019944, ENSMUSG00000028527, ENSMUSG00000036894, ENSMUSG00000067702, ENSMUSG00000026114, ENSMUSG00000034930, ENSMUSG00000032553, ENSMUSG00000050379, ENSMUSG00000001473, ENSMUSG00000020088, ENSMUSG00000032549, ENSMUSG00000018398, ENSMUSG00000015087, ENSMUSG00000040618, ENSMUSG00000019917, ENSMUSG00000032470, ENSMUSG00000002233, ENSMUSG00000039716, ENSMUSG00000070284, ENSMUSG00000024782	364	363	13288	2.01132	0.953302	0.243119	7.45093
GOTERM_MF_FAT	GO:0032561~guanyl ribonucleotide binding	20	3.57782	0.00525085	ENSMUSG00000019944, ENSMUSG00000028527, ENSMUSG00000036894, ENSMUSG00000067702, ENSMUSG00000026114, ENSMUSG00000034930, ENSMUSG00000032553, ENSMUSG00000050379, ENSMUSG00000001473, ENSMUSG00000020088, ENSMUSG00000032549, ENSMUSG00000018398, ENSMUSG00000015087, ENSMUSG00000040618, ENSMUSG00000019917, ENSMUSG00000032470, ENSMUSG00000002233, ENSMUSG00000039716, ENSMUSG00000070284, ENSMUSG00000024782	364	363	13288	2.01132	0.953302	0.243119	7.45093
GOTERM_MF_FAT	GO:0043167~ion binding	131	23.4347	0.00568168	ENSMUSG00000031441, ENSMUSG00000015652, ENSMUSG00000021456, ENSMUSG00000022120, ENSMUSG00000079834, ENSMUSG00000043639, ENSMUSG00000065979, ENSMUSG00000055560, ENSMUSG00000047250, ENSMUSG00000027963, ENSMUSG00000025512, ENSMUSG00000030541, ENSMUSG00000024150, ENSMUSG00000032047, ENSMUSG00000000276, ENSMUSG00000040249, ENSMUSG00000001999, ENSMUSG00000029994, ENSMUSG00000022464, ENSMUSG00000028161,…	364	3934	13288	1.21561	0.963708	0.241451	8.03873
GOTERM_MF_FAT	GO:0005525~GTP binding	19	3.39893	0.00863203	ENSMUSG00000019944, ENSMUSG00000028527, ENSMUSG00000036894, ENSMUSG00000067702, ENSMUSG00000034930, ENSMUSG00000032553, ENSMUSG00000050379, ENSMUSG00000020088, ENSMUSG00000001473, ENSMUSG00000032549, ENSMUSG00000018398, ENSMUSG00000015087, ENSMUSG00000040618, ENSMUSG00000019917, ENSMUSG00000032470, ENSMUSG00000002233, ENSMUSG00000039716, ENSMUSG00000070284, ENSMUSG00000024782	364	354	13288	1.95933	0.993563	0.321674	11.9714
GOTERM_MF_FAT	GO:0046872~metal ion binding	127	22.7191	0.00933317	ENSMUSG00000031441, ENSMUSG00000015652, ENSMUSG00000021456, ENSMUSG00000022120, ENSMUSG00000079834, ENSMUSG00000043639, ENSMUSG00000065979, ENSMUSG00000055560, ENSMUSG00000047250, ENSMUSG00000027963, ENSMUSG00000030541, ENSMUSG00000024150, ENSMUSG00000032047, ENSMUSG00000000276, ENSMUSG00000040249, ENSMUSG00000001999, ENSMUSG00000029994, ENSMUSG00000022464, ENSMUSG00000028161, ENSMUSG00000031651,…	364	3850	13288	1.20421	0.995735	0.322818	12.8826
GOTERM_MF_FAT	GO:0043169~cation binding	128	22.898	0.0093502	ENSMUSG00000031441, ENSMUSG00000015652, ENSMUSG00000021456, ENSMUSG00000022120, ENSMUSG00000079834, ENSMUSG00000043639, ENSMUSG00000065979, ENSMUSG00000055560, ENSMUSG00000047250, ENSMUSG00000027963, ENSMUSG00000025512, ENSMUSG00000030541, ENSMUSG00000024150, ENSMUSG00000032047, ENSMUSG00000000276, ENSMUSG00000040249, ENSMUSG00000001999, ENSMUSG00000029994, ENSMUSG00000022464, ENSMUSG00000028161,…	364	3885	13288	1.20276	0.995778	0.305452	12.9046
GOTERM_MF_FAT	GO:0000287~magnesium ion binding	20	3.57782	0.0171708	ENSMUSG00000032802, ENSMUSG00000020333, ENSMUSG00000067336, ENSMUSG00000031441, ENSMUSG00000029446, ENSMUSG00000016526, ENSMUSG00000026749, ENSMUSG00000039480, ENSMUSG00000027546, ENSMUSG00000021456, ENSMUSG00000024742, ENSMUSG00000025584, ENSMUSG00000026102, ENSMUSG00000026181, ENSMUSG00000032350, ENSMUSG00000021668, ENSMUSG00000021236, ENSMUSG00000048371, ENSMUSG00000030541, ENSMUSG00000021884	364	409	13288	1.78511	0.999958	0.467414	22.4878
GOTERM_MF_FAT	GO:0030145~manganese ion binding	10	1.78891	0.0203452	ENSMUSG00000026181, ENSMUSG00000067336, ENSMUSG00000006818, ENSMUSG00000040618, ENSMUSG00000027963, ENSMUSG00000037280, ENSMUSG00000030682, ENSMUSG00000030541, ENSMUSG00000024742, ENSMUSG00000025584	364	148	13288	2.46659	0.999994	0.505252	26.0896
GOTERM_MF_FAT	GO:0016791~phosphatase activity	13	2.32558	0.0301489	ENSMUSG00000037926, ENSMUSG00000044573, ENSMUSG00000030203, ENSMUSG00000031337, ENSMUSG00000029446, ENSMUSG00000028161, ENSMUSG00000021456, ENSMUSG00000026102, ENSMUSG00000026181, ENSMUSG00000031383, ENSMUSG00000026176, ENSMUSG00000020593, ENSMUSG00000048371	364	238	13288	1.994	1	0.628353	36.2526
GOTERM_MF_FAT	GO:0001883~purine nucleoside binding	55	9.839	0.0349779	ENSMUSG00000032802, ENSMUSG00000031441, ENSMUSG00000020333, ENSMUSG00000024422, ENSMUSG00000032932, ENSMUSG00000022432, ENSMUSG00000069631, ENSMUSG00000034206, ENSMUSG00000032601, ENSMUSG00000042751, ENSMUSG00000015652, ENSMUSG00000032501, ENSMUSG00000026198, ENSMUSG00000027610, ENSMUSG00000000276, ENSMUSG00000021408, ENSMUSG00000006494, ENSMUSG00000067336, ENSMUSG00000017499, ENSMUSG00000052459,…	364	1548	13288	1.29703	1	0.663991	40.7649
GOTERM_MF_FAT	GO:0001882~nucleoside binding	55	9.839	0.0383663	ENSMUSG00000032802, ENSMUSG00000031441, ENSMUSG00000020333, ENSMUSG00000024422, ENSMUSG00000032932, ENSMUSG00000022432, ENSMUSG00000069631, ENSMUSG00000034206, ENSMUSG00000032601, ENSMUSG00000042751, ENSMUSG00000015652, ENSMUSG00000032501, ENSMUSG00000026198, ENSMUSG00000027610, ENSMUSG00000000276, ENSMUSG00000021408, ENSMUSG00000006494, ENSMUSG00000067336, ENSMUSG00000017499, ENSMUSG00000052459,…	364	1558	13288	1.2887	1	0.679682	43.7514
GOTERM_MF_FAT	GO:0046914~transition metal ion binding	86	15.3846	0.0399662	ENSMUSG00000058240, ENSMUSG00000020020, ENSMUSG00000027820, ENSMUSG00000074656, ENSMUSG00000015652, ENSMUSG00000022120, ENSMUSG00000079834, ENSMUSG00000043639, ENSMUSG00000042408, ENSMUSG00000055560, ENSMUSG00000047250, ENSMUSG00000037999, ENSMUSG00000021668, ENSMUSG00000027963, ENSMUSG00000030682, ENSMUSG00000041926, ENSMUSG00000031604, ENSMUSG00000030541, ENSMUSG00000000276, ENSMUSG00000001999,…	364	2608	13288	1.20379	1	0.677088	45.1122
GOTERM_MF_FAT	GO:0030554~adenyl nucleotide binding	54	9.66011	0.0419909	ENSMUSG00000032802, ENSMUSG00000031441, ENSMUSG00000020333, ENSMUSG00000024422, ENSMUSG00000032932, ENSMUSG00000022432, ENSMUSG00000069631, ENSMUSG00000034206, ENSMUSG00000032601, ENSMUSG00000042751, ENSMUSG00000015652, ENSMUSG00000032501, ENSMUSG00000026198, ENSMUSG00000027610, ENSMUSG00000000276, ENSMUSG00000021408, ENSMUSG00000006494, ENSMUSG00000067336, ENSMUSG00000017499, ENSMUSG00000052459,…	364	1535	13288	1.28423	1	0.678529	46.7903
GOTERM_MF_FAT	GO:0005543~phospholipid binding	8	1.43113	0.0446029	ENSMUSG00000029994, ENSMUSG00000029484, ENSMUSG00000027712, ENSMUSG00000031557, ENSMUSG00000017774, ENSMUSG00000024659, ENSMUSG00000041801, ENSMUSG00000016200	364	119	13288	2.45415	1	0.684814	48.8846
GOTERM_MF_FAT	GO:0005506~iron ion binding	16	2.86225	0.0498839	ENSMUSG00000042770, ENSMUSG00000032374, ENSMUSG00000050708, ENSMUSG00000022718, ENSMUSG00000028161, ENSMUSG00000063694, ENSMUSG00000015652, ENSMUSG00000082062, ENSMUSG00000079834, ENSMUSG00000056436, ENSMUSG00000026177, ENSMUSG00000047250, ENSMUSG00000022551, ENSMUSG00000027809, ENSMUSG00000006373, ENSMUSG00000031604, ENSMUSG00000024039	364	343	13288	1.70288	1	0.710876	52.8864
GOTERM_MF_FAT	GO:0032559~adenyl ribonucleotide binding	51	9.12343	0.0542024	ENSMUSG00000032802, ENSMUSG00000031441, ENSMUSG00000020333, ENSMUSG00000024422, ENSMUSG00000032932, ENSMUSG00000022432, ENSMUSG00000069631, ENSMUSG00000034206, ENSMUSG00000032601, ENSMUSG00000042751, ENSMUSG00000032501, ENSMUSG00000026198, ENSMUSG00000027610, ENSMUSG00000000276, ENSMUSG00000021408, ENSMUSG00000006494, ENSMUSG00000067336, ENSMUSG00000052459, ENSMUSG00000017499, ENSMUSG00000026749,…	364	1460	13288	1.27519	1	0.726736	55.9396
GOTERM_MF_FAT	GO:0004721~phosphoprotein phosphatase activity	9	1.61002	0.0570403	ENSMUSG00000031383, ENSMUSG00000037926, ENSMUSG00000026181, ENSMUSG00000044573, ENSMUSG00000026176, ENSMUSG00000030203, ENSMUSG00000031337, ENSMUSG00000028161, ENSMUSG00000048371	364	152	13288	2.16151	1	0.731442	57.8446
GOTERM_MF_FAT	GO:0008092~cytoskeletal protein binding	18	3.22004	0.0614125	ENSMUSG00000026705, ENSMUSG00000037926, ENSMUSG00000062014, ENSMUSG00000038366, ENSMUSG00000011751, ENSMUSG00000030161, ENSMUSG00000051343, ENSMUSG00000029761, ENSMUSG00000070372, ENSMUSG00000031207, ENSMUSG00000068744, ENSMUSG00000024376, ENSMUSG00000018411, ENSMUSG00000038175, ENSMUSG00000017774, ENSMUSG00000020592, ENSMUSG00000024300, ENSMUSG00000015932	364	414	13288	1.5872	1	0.744919	60.6298
GOTERM_MF_FAT	GO:0008375~acetylglucosaminyltransferase activity	4	0.715564	0.0648946	ENSMUSG00000042428, ENSMUSG00000032226, ENSMUSG00000028838, ENSMUSG00000027963	364	34	13288	4.29476	1	0.752077	62.7242
GOTERM_MF_FAT	GO:0019888~protein phosphatase regulator activity	4	0.715564	0.0794547	ENSMUSG00000026626, ENSMUSG00000040653, ENSMUSG00000036398, ENSMUSG00000027317	364	37	13288	3.94654	1	0.810144	70.4071
GOTERM_MF_FAT	GO:0003716~RNA polymerase I transcription termination factor activity	2	0.357782	0.0797411	ENSMUSG00000026803, ENSMUSG00000004044	364	3	13288	24.337	1	0.80054	70.5422
GOTERM_MF_FAT	GO:0019834~phospholipase A2 inhibitor activity	2	0.357782	0.0797411	ENSMUSG00000029484, ENSMUSG00000024659	364	3	13288	24.337	1	0.80054	70.5422
GOTERM_MF_FAT	GO:0003715~transcription termination factor activity	2	0.357782	0.0797411	ENSMUSG00000026803, ENSMUSG00000004044	364	3	13288	24.337	1	0.80054	70.5422
GOTERM_MF_FAT	GO:0005524~ATP binding	49	8.76565	0.0860384	ENSMUSG00000032802, ENSMUSG00000031441, ENSMUSG00000020333, ENSMUSG00000024422, ENSMUSG00000032932, ENSMUSG00000022432, ENSMUSG00000069631, ENSMUSG00000034206, ENSMUSG00000042751, ENSMUSG00000032501, ENSMUSG00000026198, ENSMUSG00000027610, ENSMUSG00000000276, ENSMUSG00000021408, ENSMUSG00000006494, ENSMUSG00000067336, ENSMUSG00000052459, ENSMUSG00000017499, ENSMUSG00000026749, ENSMUSG00000027546,…	364	1443	13288	1.23962	1	0.815306	73.3719
GOTERM_MF_FAT	GO:0019208~phosphatase regulator activity	4	0.715564	0.0952933	ENSMUSG00000026626, ENSMUSG00000040653, ENSMUSG00000036398, ENSMUSG00000027317	364	40	13288	3.65055	1	0.838197	77.0739
GOTERM_MF_FAT	GO:0016209~antioxidant activity	4	0.715564	0.0952933	ENSMUSG00000032802, ENSMUSG00000006818, ENSMUSG00000047250, ENSMUSG00000026701	364	40	13288	3.65055	1	0.838197	77.0739
