# Supplementary material for: PHF13 is a molecular reader and transcriptional co-regulator of H3K4me2/3
Source: eLife journal article supplement (doi:10.7554/elife.10607), 2016-05-25

### Motif 1 oligos\_6nt\_mkv4\_m1

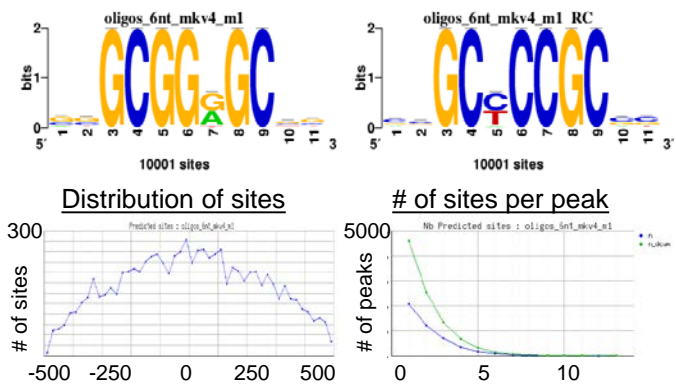

### Motif 2 oligos\_6nt\_mkv4\_m2

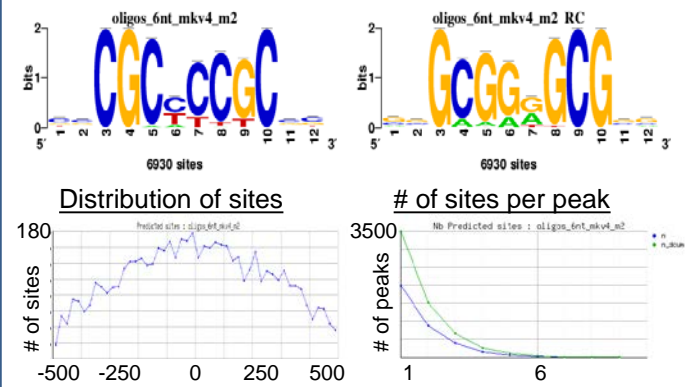

### Motif 3 oligos\_6nt\_mkv4\_m3

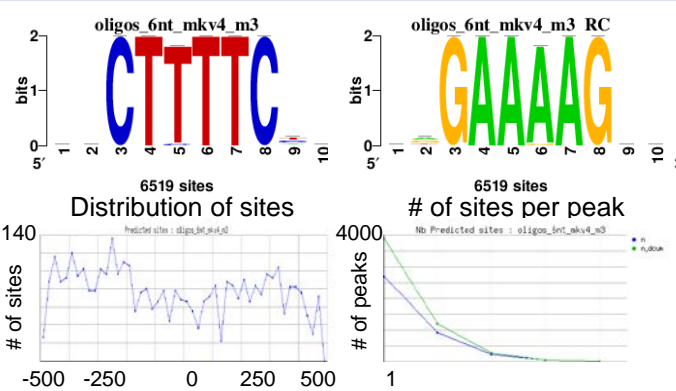

### Motif 4 local\_words\_6nt\_m1

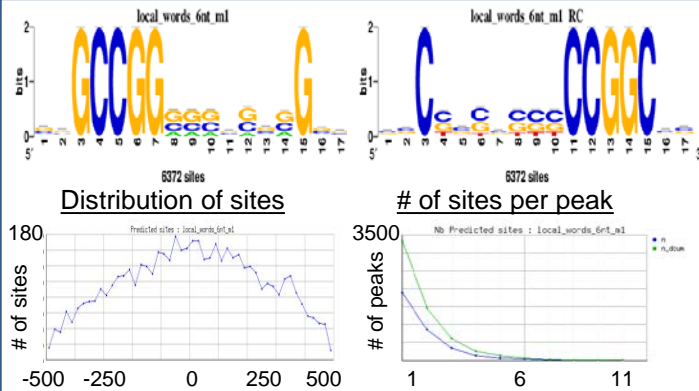

### Motif 5 local\_words\_6nt\_m2

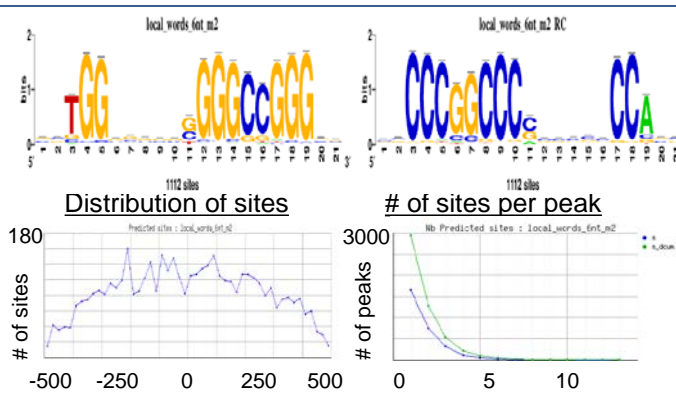

### Motif 6 local\_words\_6nt\_m3

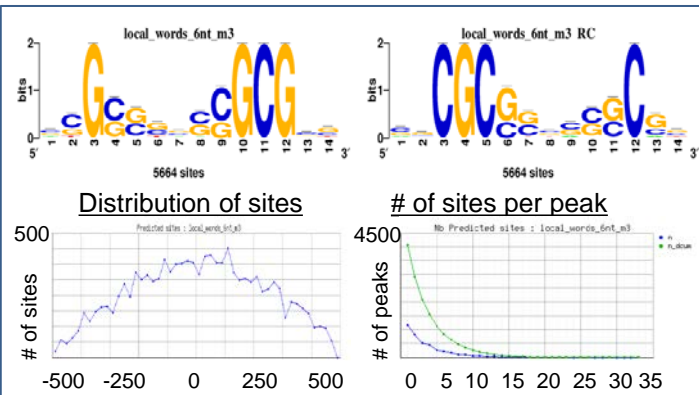

### Motif 7 positions\_6nt\_m1

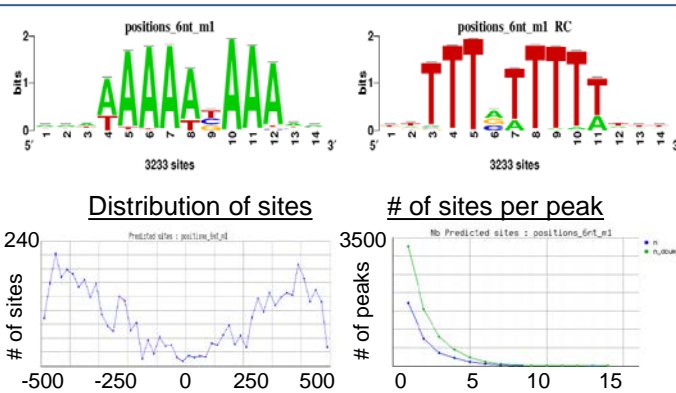

### Motif 8 positions\_6nt\_m2

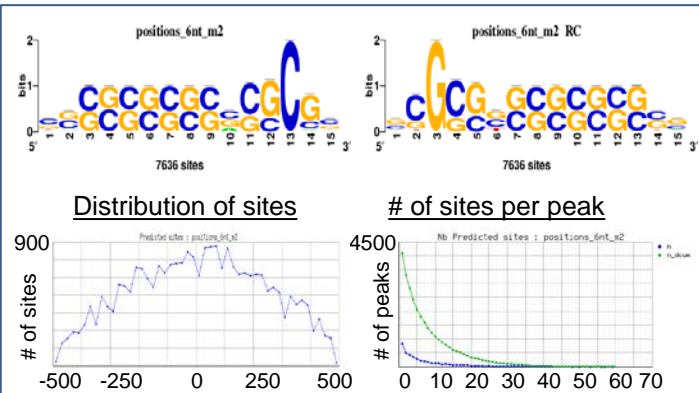

Supplement: supp [file elife-10607-supp-v2.zip]
